# Supplementary material
Source: ML conference proceedings conference paper supplement (https://openreview.net/forum?id=RHRN3zY3IA)
Supplement: supplementary_material [file attachment]

## Sheet: News
发布日期	资讯标题	资讯正文
20230529	【李云泽：坚决遏制增量风险 牢牢守住不发生系统性风险的底线】财联社5月29日电，5月25日至29日，国家金融监督管理总局党委举办学习贯彻习近平新时代中国特色社会主义思想主题教育第二期读书班暨党委理论学习中心组集体学习研讨。李云泽在总结发言中强调，要以习近平新时代中国特色社会主义思想的世界观和方法论为指导，不断加强和完善现代金融监管。一是要深刻领会金融工作的政治性和人民性，始终坚持党对金融工作的集中统一领导。坚决拥护“两个确立”，切实做到“两个维护”，进一步提高政治判断力、政治领悟力、政治执行力，将加强党的全面领导贯穿于金融工作的全过程、各方面，把党的领导制度优势转化为金融治理效能。二是要准确把握中国国情和金融工作规律，着力构建中国特色金融监管体系。深刻把握职责定位，主动担当作为，全面强化机构监管、行为监管、功能监管、穿透式监管、持续监管，切实提高监管质效。三是要坚持稳中求进、开拓创新，妥…	23:58:27_x000D_ 【李云泽：坚决遏制增量风险 牢牢守住不发生系统性风险的底线】财联社5月29日电，5月25日至29日，国家金融监督管理总局党委举办学习贯彻习近平新时代中国特色社会主义思想主题教育第二期读书班暨党委理论学习中心组集体学习研讨。李云泽在总结发言中强调，要以习近平新时代中国特色社会主义思想的世界观和方法论为指导，不断加强和完善现代金融监管。一是要深刻领会金融工作的政治性和人民性，始终坚持党对金融工作的集中统一领导。坚决拥护“两个确立”，切实做到“两个维护”，进一步提高政治判断力、政治领悟力、政治执行力，将加强党的全面领导贯穿于金融工作的全过程、各方面，把党的领导制度优势转化为金融治理效能。二是要准确把握中国国情和金融工作规律，着力构建中国特色金融监管体系。深刻把握职责定位，主动担当作为，全面强化机构监管、行为监管、功能监管、穿透式监管、持续监管，切实提高监管质效。…
20230604	【主要产油国部长级会议今日将决定是否减产】财联社6月4日电，石油输出国组织（欧佩克）当地时间6月3日在维也纳举行部长级会议。据悉，以沙特为首的产油国希望在此次会议上推动进一步削减原油产量，以提振国际油价，具体方案是每天减产100万桶。不过在当天的会议上，与会代表们并没有就此进行讨论，这一问题需要在4日的会议上，与非欧佩克主要产油国俄罗斯进行讨论之后，才会作出最后决定。	12:09:00_x000D_ 【主要产油国部长级会议今日将决定是否减产】财联社6月4日电，石油输出国组织（欧佩克）当地时间6月3日在维也纳举行部长级会议。据悉，以沙特为首的产油国希望在此次会议上推动进一步削减原油产量，以提振国际油价，具体方案是每天减产100万桶。不过在当天的会议上，与会代表们并没有就此进行讨论，这一问题需要在4日的会议上，与非欧佩克主要产油国俄罗斯进行讨论之后，才会作出最后决定。
20230606	【科美诊断：股东拟合计减持不超过6%公司股份】《科创板日报》6日讯，科美诊断公告，股东横琴君联致康及其一致行动人LOYAL CLASS合计持有公司10.35%股份，拟合计减持不超过6%。	16:26:07_x000D_ 【科美诊断：股东拟合计减持不超过6%公司股份】《科创板日报》6日讯，科美诊断公告，股东横琴君联致康及其一致行动人LOYAL CLASS合计持有公司10.35%股份，拟合计减持不超过6%。
20230617	【江西工职院“6·1”食品安全事件调查处理情况公布：判定异物为老鼠类啮齿动物的头部】财联社6月17日电，江西工业职业技术学院“6·1”食品安全事件调查结果公布，针对江西工业职业技术学院“6·1”食品安全事件，江西省教育厅、省公安厅、省国资委、省市场监督管理局组成的联合调查组，本着实事求是原则开展调查，现将有关情况通报如下。联合调查组经勘查现场，调取监控视频发现，6月1日，学生在食堂吃出疑似为“鼠头”的异物，被涉事食堂工作人员事发当日丢弃。通过查看食堂后厨视频，查阅采购清单，询问涉事食堂负责人、后厨相关当事人、当事学生和现场围观学生等，判定异物不是鸭脖。根据国内权威动物专家对提取的当事学生所拍现场照片和视频进行专业辨识，判定异物为老鼠类啮齿动物的头部。南昌高新区市场监督管理局昌东分局、江西工业职业技术学院未认真调查取证，发布“异物为鸭脖”结论是错误的。经认定，江西工业职业技术学院对此次事件…	12:31:37_x000D_ 【江西工职院“6·1”食品安全事件调查处理情况公布：判定异物为老鼠类啮齿动物的头部】财联社6月17日电，江西工业职业技术学院“6·1”食品安全事件调查结果公布，针对江西工业职业技术学院“6·1”食品安全事件，江西省教育厅、省公安厅、省国资委、省市场监督管理局组成的联合调查组，本着实事求是原则开展调查，现将有关情况通报如下。_x000D_ _x000D_ _x000D_ _x000D_ 联合调查组经勘查现场，调取监控视频发现，6月1日，学生在食堂吃出疑似为“鼠头”的异物，被涉事食堂工作人员事发当日丢弃。通过查看食堂后厨视频，查阅采购清单，询问涉事食堂负责人、后厨相关当事人、当事学生和现场围观学生等，判定异物不是鸭脖。根据国内权威动物专家对提取的当事学生所拍现场照片和视频进行专业辨识，判定异物为老鼠类啮齿动物的头部。南昌高新区市场监督管理局昌东分局、江西工业职…
20230605	【午评：创业板指低开低走跌近1.5% AI应用方向再度活跃】财联社6月5日电，市场早盘震荡分化，沪指小幅上涨，创业板指陷入调整，宁德时代、阳光电源一度跌超5%。盘面上，AI应用方向再度活跃，传媒、游戏股领涨，北京文化、天地在线、中广天择、中国出版等涨停。通信概念股震荡走强，本川智能20CM涨停，长江通信、中瓷电子涨停。旅游股震荡反弹，峨眉山A涨停，长白山涨超8%。半导体板块开盘冲高，北方华创一度涨停。下跌方面，白酒等消费股走势低迷，舍得酒业跌停。总体上个股上涨和下跌家数基本相当。沪深两市今日成交额5702亿，较上个交易日缩量284亿。板块方面，旅游、传媒、通信服务、手机游戏等板块涨幅居前，家电、猪肉、白酒、CRO等板块跌幅居前。截至上午收盘，沪指涨0.08%，深成指跌0.62%，创业板指跌1.47%。北向资金方面，沪股通早盘净流入6.09亿，深股通早盘净流出8.13亿。	11:32:15_x000D_ 【午评：创业板指低开低走跌近1.5% AI应用方向再度活跃】财联社6月5日电，市场早盘震荡分化，沪指小幅上涨，创业板指陷入调整，宁德时代、阳光电源一度跌超5%。盘面上，AI应用方向再度活跃，传媒、游戏股领涨，北京文化、天地在线、中广天择、中国出版等涨停。通信概念股震荡走强，本川智能20CM涨停，长江通信、中瓷电子涨停。旅游股震荡反弹，峨眉山A涨停，长白山涨超8%。半导体板块开盘冲高，北方华创一度涨停。下跌方面，白酒等消费股走势低迷，舍得酒业跌停。总体上个股上涨和下跌家数基本相当。沪深两市今日成交额5702亿，较上个交易日缩量284亿。板块方面，旅游、传媒、通信服务、手机游戏等板块涨幅居前，家电、猪肉、白酒、CRO等板块跌幅居前。截至上午收盘，沪指涨0.08%，深成指跌0.62%，创业板指跌1.47%。北向资金方面，沪股通早盘净流入6.09亿，深股通早盘净流…
20230606	【中金：美元指数或将在下半年进一步走弱】财联社6月6日电，中金公司研报指出，在经历了上半年的区间波动后，驱动美元指数波动的因素料将在下半年发生变化。我们认为美联储的加息周期将达到顶点，尽管年内降息的可能性还相对较低，但随着加息对于经济的滞后效应逐渐显现，美国经济增速与通胀料将逐渐放缓，而市场对于降息的预期或也将逐步走高，进而推动美债收益率从当前的相对高点回落。数据显示一年内美国迈入衰退的概率或明显大于欧洲，且随着中国下半年继续温和复苏，美国与中欧的经济基本面或趋于收敛，总体来看，美元的趋势性逆转的转折点可能要等到美联储停止加息乃至降息预期逐步升温后才能够真正获得确认。在基准情形下，我们认为美元指数或将在下半年进一步走弱。	07:57:49_x000D_ 【中金：美元指数或将在下半年进一步走弱】财联社6月6日电，中金公司研报指出，在经历了上半年的区间波动后，驱动美元指数波动的因素料将在下半年发生变化。我们认为美联储的加息周期将达到顶点，尽管年内降息的可能性还相对较低，但随着加息对于经济的滞后效应逐渐显现，美国经济增速与通胀料将逐渐放缓，而市场对于降息的预期或也将逐步走高，进而推动美债收益率从当前的相对高点回落。数据显示一年内美国迈入衰退的概率或明显大于欧洲，且随着中国下半年继续温和复苏，美国与中欧的经济基本面或趋于收敛，总体来看，美元的趋势性逆转的转折点可能要等到美联储停止加息乃至降息预期逐步升温后才能够真正获得确认。在基准情形下，我们认为美元指数或将在下半年进一步走弱。
20230609	【海康威视回应股价下跌：公司经营正常 股价下跌可能和基金仓位调整有关】财联社6月9日电，今天上午，海康威视盘中闪崩跌超8%，股价逼近年内低点，成交额近11亿元环比显著放大。今早，记者以投资人身份致电海康威视，公司表示不清楚是什么原因，目前经营状况一切正常，工作人员表示可能和公募基金仓位调整有关。 (第一财经)	11:28:53_x000D_ 【海康威视回应股价下跌：公司经营正常 股价下跌可能和基金仓位调整有关】财联社6月9日电，今天上午，海康威视盘中闪崩跌超8%，股价逼近年内低点，成交额近11亿元环比显著放大。今早，记者以投资人身份致电海康威视，公司表示不清楚是什么原因，目前经营状况一切正常，工作人员表示可能和公募基金仓位调整有关。 (第一财经)
20230613	【盛通股份：公司已打造覆盖青少年科技教育全产业链生态的教育集团】财联社6月13日电，盛通股份发布股价异动公告，公司已经打造了覆盖青少年科技教育全产业链生态的教育集团。受人工智能普及以及相关AI应用落地影响，公司所处的科技教育赛道校内外需求端可能有所变化，需要一段时间进行验证，且基本面改善仍需要一些时间。	16:59:59_x000D_ 【盛通股份：公司已打造覆盖青少年科技教育全产业链生态的教育集团】财联社6月13日电，盛通股份发布股价异动公告，公司已经打造了覆盖青少年科技教育全产业链生态的教育集团。受人工智能普及以及相关AI应用落地影响，公司所处的科技教育赛道校内外需求端可能有所变化，需要一段时间进行验证，且基本面改善仍需要一些时间。
20230614	财联社6月14日电，城地香江披露股票交易异常波动的公告，目前市场上有流传关于公司将为特斯拉FSD提供相关算力中心的不实消息，经公司内部核实，暂不存在涉及上述新闻报道的工作内容、计划及安排，如未来有涉及相关工作内容、计划及安排，公司将第一时间就相关事项进行披露。	18:49:24_x000D_ 财联社6月14日电，城地香江披露股票交易异常波动的公告，目前市场上有流传关于公司将为特斯拉FSD提供相关算力中心的不实消息，经公司内部核实，暂不存在涉及上述新闻报道的工作内容、计划及安排，如未来有涉及相关工作内容、计划及安排，公司将第一时间就相关事项进行披露。
20230628	【金证股份：拟转让金智维部分股权并放弃增资优先认购权】财联社6月28日电，金证股份公告，公司拟以4590.3万元对价向银河源汇和共青城和炜转让所持有的参股公司珠海金智维信息科技有限公司（简称“金智维”）对应约58万元的注册资本。同时金智维计划通过增资扩股引入外部投资者，银河源汇将出资1500万元认购金智维新增注册资本约19万元，公司放弃行使优先认购权。本次交易完成后，公司将持有金智维12.14%的股权，为金智维第二大股东。	16:31:01_x000D_ 【金证股份：拟转让金智维部分股权并放弃增资优先认购权】财联社6月28日电，金证股份公告，公司拟以4590.3万元对价向银河源汇和共青城和炜转让所持有的参股公司珠海金智维信息科技有限公司（简称“金智维”）对应约58万元的注册资本。同时金智维计划通过增资扩股引入外部投资者，银河源汇将出资1500万元认购金智维新增注册资本约19万元，公司放弃行使优先认购权。本次交易完成后，公司将持有金智维12.14%的股权，为金智维第二大股东。
20230703	【收评：沪指高开高走收涨1.31% 两市成交金额重上万亿】财联社7月3日电，大盘全天强势震荡，三大指数全线收高，权重板块表现强势，沪指收涨超1%。盘面上，旅游酒店、零售、食品饮料等大消费板块表现活跃，长白山、同庆楼、人人乐、麦趣尔涨停。汽车产业链全天维持强势，众泰汽车、中通客车、赛力斯、金龙汽车、浙江世宝、广东鸿图涨停。复合集流体板块涨势延续，英联股份、宝明科技涨停。风、光、储新能源赛道活跃，金晶科技、兆新股份、大金重工、科华数据涨停。大金融、中字头等权重股午后拉升沪指，中钢国际、中国软件涨停，新华保险、东吴证券大涨超6%。下跌方面，游戏股持续领跌AI概念，姚记科技、电魂网络、世纪华通跌停。机器人板块震荡调整，中大力德、鸣志电器跌停。总体上个股涨多跌少，两市超3000只个股上涨。沪深两市今日成交额10151亿，较上个交易日放量965亿，两市成交金额重回万亿元上方。板块方面，民航、旅游酒店…	15:01:53_x000D_ 【收评：沪指高开高走收涨1.31% 两市成交金额重上万亿】财联社7月3日电，大盘全天强势震荡，三大指数全线收高，权重板块表现强势，沪指收涨超1%。盘面上，旅游酒店、零售、食品饮料等大消费板块表现活跃，长白山、同庆楼、人人乐、麦趣尔涨停。汽车产业链全天维持强势，众泰汽车、中通客车、赛力斯、金龙汽车、浙江世宝、广东鸿图涨停。复合集流体板块涨势延续，英联股份、宝明科技涨停。风、光、储新能源赛道活跃，金晶科技、兆新股份、大金重工、科华数据涨停。大金融、中字头等权重股午后拉升沪指，中钢国际、中国软件涨停，新华保险、东吴证券大涨超6%。下跌方面，游戏股持续领跌AI概念，姚记科技、电魂网络、世纪华通跌停。机器人板块震荡调整，中大力德、鸣志电器跌停。总体上个股涨多跌少，两市超3000只个股上涨。沪深两市今日成交额10151亿，较上个交易日放量965亿，两市成交金额重回万亿…
20230707	【让利型公募基金或将获批 收益6%以下仅收取千分之六管理费】财联社7月7日电，据悉，此前多家大型公募基金公司上报的合理让利型基金或将获批。据了解，让利型公募基金的产品形态为三年定期开放式基金，管理费采用按照业绩分档收费的模式，即基金收益6%以下收取千分之六管理费；收益超过6%可在1.2%-1.8%之间收取管理费。2022年年中，易方达、汇添富、华夏、嘉实、富国、银华等十余家知名基金公司正式上报合理让利型产品相关方案，不过当时尚未有明确的产品形态和管理费收取方案。 (中证金牛座)	08:10:37_x000D_ 【让利型公募基金或将获批 收益6%以下仅收取千分之六管理费】财联社7月7日电，据悉，此前多家大型公募基金公司上报的合理让利型基金或将获批。据了解，让利型公募基金的产品形态为三年定期开放式基金，管理费采用按照业绩分档收费的模式，即基金收益6%以下收取千分之六管理费；收益超过6%可在1.2%-1.8%之间收取管理费。2022年年中，易方达、汇添富、华夏、嘉实、富国、银华等十余家知名基金公司正式上报合理让利型产品相关方案，不过当时尚未有明确的产品形态和管理费收取方案。 (中证金牛座)
20230324	【部分资源类港股走低 中煤能源H股跌6%】财联社3月24日电，部分资源类港股早盘走低。截至发稿，中煤能源(01898.HK)跌6%，中国石油股份(00857.HK)跌近3%，中国石油化工股份(00386.HK)跌2%，中国海洋石油(00883.HK)跌1%。消息面上，中煤能源3月23日晚间发布年度报告，2022年实现营业收入2205.77亿元，同比下降8%；归母净利润182.41亿元，同比增长32.8%。此外，3月23日纽约商品交易所5月交货的轻质原油期货价格下跌0.94美元，收于每桶69.96美元，跌幅为1.33%。	10:15_x000D_ 【部分资源类港股走低 中煤能源H股跌6%】财联社3月24日电，部分资源类港股早盘走低。截至发稿，中煤能源(01898.HK)跌6%，中国石油股份(00857.HK)跌近3%，中国石油化工股份(00386.HK)跌2%，中国海洋石油(00883.HK)跌1%。消息面上，中煤能源3月23日晚间发布年度报告，2022年实现营业收入2205.77亿元，同比下降8%；归母净利润182.41亿元，同比增长32.8%。此外，3月23日纽约商品交易所5月交货的轻质原油期货价格下跌0.94美元，收于每桶69.96美元，跌幅为1.33%。
20230329	【安徽建工：2022年净利同比增25.94% 拟10派2.5元】财联社3月29日电，安徽建工披露年报，公司2022年实现营业收入801.2亿元，同比增长12.31%；净利润13.8亿元，同比增长25.94%；基本每股收益0.8元；公司拟每10股派发红利2.5元（含税）。报告期内，公司工程施工业务新签合同540项，合同总额1327.36亿元，新签合同金额同比增长74.87%。	19:59_x000D_ 【安徽建工：2022年净利同比增25.94% 拟10派2.5元】财联社3月29日电，安徽建工披露年报，公司2022年实现营业收入801.2亿元，同比增长12.31%；净利润13.8亿元，同比增长25.94%；基本每股收益0.8元；公司拟每10股派发红利2.5元（含税）。报告期内，公司工程施工业务新签合同540项，合同总额1327.36亿元，新签合同金额同比增长74.87%。
20230330	【金龙鱼：正在评估“中巴以本币开展大规模贸易”消息的影响】财联社3月30日电，针对外媒“中国与巴西已达成协议，使用本币开展大规模贸易”的消息，金龙鱼内部人士对财联社记者透露，公司方面刚刚获悉，“（本币贸易）应该还只是在消息层面，具体细则估计不会很快下来，影响尚待仔细评估。”小财注：据法新社等多家外媒30日报道，巴西政府周三表示，巴西已与中国达成协议，不再使用美元作为中间货币，而是以本币进行贸易。巴西贸易和投资促进局(ApexBrasil)在一份声明中表示：“预计这将降低成本，同时促进更大的双边贸易，并为投资提供便利。（财联社记者 邢祺欣）	14:58_x000D_ 【金龙鱼：正在评估“中巴以本币开展大规模贸易”消息的影响】财联社3月30日电，针对外媒“中国与巴西已达成协议，使用本币开展大规模贸易”的消息，金龙鱼内部人士对财联社记者透露，公司方面刚刚获悉，“（本币贸易）应该还只是在消息层面，具体细则估计不会很快下来，影响尚待仔细评估。”小财注：据法新社等多家外媒30日报道，巴西政府周三表示，巴西已与中国达成协议，不再使用美元作为中间货币，而是以本币进行贸易。巴西贸易和投资促进局(ApexBrasil)在一份声明中表示：“预计这将降低成本，同时促进更大的双边贸易，并为投资提供便利。（财联社记者 邢祺欣）
20230330	【阿里首席财务官：业务集团上市后 会进一步评估是保持控制还是放弃控制】财联社3月30日电，在阿里巴巴电话会上，阿里首席财务官徐宏在回应哪个业务板块会先独立上市时表示，在所有的业务板块和业务公司里，除了现在淘宝天猫商业集团之外，其他所有的业务集团和业务公司都会形成可独立融资和分拆，包括寻找独立上市主体，阿里认为整个市场是最好的试金石，“未来所有具备条件的业务集团和公司，当他们都有独立融资和上市的主体后，我们会准备好一个上一个。在它们上市后，会进一步评估他们对整个阿里集团的重要性，来决定是不是保持控制，还是可以放弃控制。”	08:21_x000D_ 【阿里首席财务官：业务集团上市后 会进一步评估是保持控制还是放弃控制】财联社3月30日电，在阿里巴巴电话会上，阿里首席财务官徐宏在回应哪个业务板块会先独立上市时表示，在所有的业务板块和业务公司里，除了现在淘宝天猫商业集团之外，其他所有的业务集团和业务公司都会形成可独立融资和分拆，包括寻找独立上市主体，阿里认为整个市场是最好的试金石，“未来所有具备条件的业务集团和公司，当他们都有独立融资和上市的主体后，我们会准备好一个上一个。在它们上市后，会进一步评估他们对整个阿里集团的重要性，来决定是不是保持控制，还是可以放弃控制。”
20230606	20:23 _x000D_ [[+_+]]_x000D_ 专享 专享_x000D_ 【风口研报·公司】打破海外厂商垄断，这家公司的5G终端关键射频元件今年将实现批量出货，今明年两年或实现10倍业绩增幅；“天降”180亿元长期增量市场，公司股	20:23 _x000D_ [[+_+]]_x000D_ 专享 专享_x000D_ 【风口研报·公司】打破海外厂商垄断，这家公司的5G终端关键射频元件今年将实现批量出货，今明年两年或实现10倍业绩增幅；“天降”180亿元长期增量市场，公司股权转让后有望成为保利旗下唯一装配式装修平台 解锁直达>>
20230617	【江西工职院“6·1”食品安全事件调查处理情况公布：判定异物为老鼠类啮齿动物的头部】财联社6月17日电，江西工业职业技术学院“6·1”食品安全事件调查结果公布，针对江西工业职业技术学院“6·1”食品安全事件，江西省教育厅、省公安厅、省国资委、省市场监督管理局组成的联合调查组，本着实事求是原则开展调查，现将有关情况通报如下。联合调查组经勘查现场，调取监控视频发现，6月1日，学生在食堂吃出疑似为“鼠头”的异物，被涉事食堂工作人员事发当日丢弃。通过查看食堂后厨视频，查阅采购清单，询问涉事食堂负责人、后厨相关当事人、当事学生和现场围观学生等，判定异物不是鸭脖。根据国内权威动物专家对提取的当事学生所拍现场照片和视频进行专业辨识，判定异物为老鼠类啮齿动物的头部。南昌高新区市场监督管理局昌东分局、江西工业职业技术学院未认真调查取证，发布“异物为鸭脖”结论是错误的。经认定，江西工业职业技术学院对此次事件…	12:31:37_x000D_ 【江西工职院“6·1”食品安全事件调查处理情况公布：判定异物为老鼠类啮齿动物的头部】财联社6月17日电，江西工业职业技术学院“6·1”食品安全事件调查结果公布，针对江西工业职业技术学院“6·1”食品安全事件，江西省教育厅、省公安厅、省国资委、省市场监督管理局组成的联合调查组，本着实事求是原则开展调查，现将有关情况通报如下。_x000D_ _x000D_ _x000D_ _x000D_ 联合调查组经勘查现场，调取监控视频发现，6月1日，学生在食堂吃出疑似为“鼠头”的异物，被涉事食堂工作人员事发当日丢弃。通过查看食堂后厨视频，查阅采购清单，询问涉事食堂负责人、后厨相关当事人、当事学生和现场围观学生等，判定异物不是鸭脖。根据国内权威动物专家对提取的当事学生所拍现场照片和视频进行专业辨识，判定异物为老鼠类啮齿动物的头部。南昌高新区市场监督管理局昌东分局、江西工业职…
20230620	【西藏矿业：拟将白银扎布耶100%股权挂牌转让底价调整为4.79亿元】财联社6月20日电，西藏矿业公告，截至2023年5月22日第三次挂牌期满后，公司尚未征集到控股子公司白银扎布耶锂业有限公司100%股权意向受让方。公司决定将白银扎布耶100%股权挂牌转让底价调整为4.79亿元（在首次挂牌价格的基础上降价30%），并委托上海联合产权交易所进行第四轮公开挂牌转让。	18:19:30_x000D_ 【西藏矿业：拟将白银扎布耶100%股权挂牌转让底价调整为4.79亿元】财联社6月20日电，西藏矿业公告，截至2023年5月22日第三次挂牌期满后，公司尚未征集到控股子公司白银扎布耶锂业有限公司100%股权意向受让方。公司决定将白银扎布耶100%股权挂牌转让底价调整为4.79亿元（在首次挂牌价格的基础上降价30%），并委托上海联合产权交易所进行第四轮公开挂牌转让。
20230611	【去年结婚人数创37年来新低 近9年结婚人数下降49.3%】财联社6月11日电，民政部最新发布的统计季报数据显示，2022年我国结婚人数为683.3万对。梳理数据发现，这一数据创下了1986年（民政部网站公布有1986年以来的数据）来的新低。同时，这也是自2013年达到1346.9万对的最高峰后，结婚人数连续9年下降。从数据来看，2022年结婚登记人数比上一年减少了80.3万对，下降10.5%。与2013年最高峰相比，9年来，我国结婚人数下降了49.3%，下降幅度近半。 (第一财经)	18:58:40_x000D_ 【去年结婚人数创37年来新低 近9年结婚人数下降49.3%】财联社6月11日电，民政部最新发布的统计季报数据显示，2022年我国结婚人数为683.3万对。梳理数据发现，这一数据创下了1986年（民政部网站公布有1986年以来的数据）来的新低。同时，这也是自2013年达到1346.9万对的最高峰后，结婚人数连续9年下降。从数据来看，2022年结婚登记人数比上一年减少了80.3万对，下降10.5%。与2013年最高峰相比，9年来，我国结婚人数下降了49.3%，下降幅度近半。 (第一财经)
20230618	【美国务卿布林肯今早抵达北京 开启两天的访华行程】财联社6月18日电，美国国务卿布林肯已在6月18日早上抵达中国北京，开启两天访华之行。这是布林肯首次以国务卿的身份访华，这也是自2018年10月以来访问中国的最高级别美国官员。据路透社报道，预计布林肯将在18日与多名中方高级官员会面。报道分析称，此访将为未来两国之间更多高层交往铺路，包括美国财政部长耶伦、商务部长雷蒙多的访华。 (澎湃新闻)	10:56:46_x000D_ 【美国务卿布林肯今早抵达北京 开启两天的访华行程】财联社6月18日电，美国国务卿布林肯已在6月18日早上抵达中国北京，开启两天访华之行。这是布林肯首次以国务卿的身份访华，这也是自2018年10月以来访问中国的最高级别美国官员。据路透社报道，预计布林肯将在18日与多名中方高级官员会面。报道分析称，此访将为未来两国之间更多高层交往铺路，包括美国财政部长耶伦、商务部长雷蒙多的访华。 (澎湃新闻)
20230625	【央行公开市场净投放1520亿元】财联社6月25日电，央行今日进行1960亿元7天期逆回购操作，中标利率为1.90%，与此前持平。因今日有440亿元逆回购到期，实现净投放1520亿元。	09:22:04_x000D_ 【央行公开市场净投放1520亿元】财联社6月25日电，央行今日进行1960亿元7天期逆回购操作，中标利率为1.90%，与此前持平。因今日有440亿元逆回购到期，实现净投放1520亿元。
20230626	【天风证券：AI赋能下空间可期 看好特斯拉供应链】财联社6月26日电，天风证券研报表示，我们认为行业发生了明显的变化，人形机器人有望实现0到1的突破，即供给侧-出现明显变化+技术侧-人工智能技术取得重大进展。人形机器人行业壁垒高+天花板高+产业链长，是未来不可多得的有望超越此前消费电子-苹果产业链、特斯拉-电动车产业链的长坡后雪大赛道。更重要的是人形机器人产业链后续有望看到持续催化、AI发展等，继续看好特斯拉实现人形机器人梦想，建议关注人形机器人潜在国产零部件供应链拓普集团、鸣志电器、鼎智科技/江苏雷利、三花智控、中大力德、双环传动；柯力传感、汇川技术、步科股份等。	08:12:45_x000D_ 【天风证券：AI赋能下空间可期 看好特斯拉供应链】财联社6月26日电，天风证券研报表示，我们认为行业发生了明显的变化，人形机器人有望实现0到1的突破，即供给侧-出现明显变化+技术侧-人工智能技术取得重大进展。人形机器人行业壁垒高+天花板高+产业链长，是未来不可多得的有望超越此前消费电子-苹果产业链、特斯拉-电动车产业链的长坡后雪大赛道。更重要的是人形机器人产业链后续有望看到持续催化、AI发展等，继续看好特斯拉实现人形机器人梦想，建议关注人形机器人潜在国产零部件供应链拓普集团、鸣志电器、鼎智科技/江苏雷利、三花智控、中大力德、双环传动；柯力传感、汇川技术、步科股份等。
20230627	【午评：沪指震荡反弹涨0.93% 房地产产业链个股集体走强】财联社6月27日电，市场早盘震荡反弹，三大指数涨跌不一，沪指偏强。盘面上，中船系个股大涨，中国动力、中船科技涨停。地产产业链个股集体走强，中南建设、中迪投资、好太太、哈尔斯等涨停。氢能源概念股震荡走高，京城股份、美锦能源、华电重工等多股涨停。AI概念股展开反弹，拓维信息、万达电影涨停。旅游等消费股开盘冲高，曲江文旅、长白山、西安旅游涨停。下跌方面，机器人概念股陷入调整，德恩精工、丰立智能等跌超5%。总体上个股涨多跌少，两市超4100只个股上涨。沪深两市今日成交额5177亿，较上个交易日缩量1171亿。板块方面，中船系、旅游、房地产、家用轻工等板块涨幅居前，仅电力和自动化设备两个板块下跌。截至上午收盘，沪指涨0.93%，深成指涨0.57%，创业板指跌0.05%。北向资金方面，沪股通早盘净流入2.65亿，深股通早盘净流出24.94亿。	11:32:51_x000D_ 【午评：沪指震荡反弹涨0.93% 房地产产业链个股集体走强】财联社6月27日电，市场早盘震荡反弹，三大指数涨跌不一，沪指偏强。盘面上，中船系个股大涨，中国动力、中船科技涨停。地产产业链个股集体走强，中南建设、中迪投资、好太太、哈尔斯等涨停。氢能源概念股震荡走高，京城股份、美锦能源、华电重工等多股涨停。AI概念股展开反弹，拓维信息、万达电影涨停。旅游等消费股开盘冲高，曲江文旅、长白山、西安旅游涨停。下跌方面，机器人概念股陷入调整，德恩精工、丰立智能等跌超5%。总体上个股涨多跌少，两市超4100只个股上涨。沪深两市今日成交额5177亿，较上个交易日缩量1171亿。板块方面，中船系、旅游、房地产、家用轻工等板块涨幅居前，仅电力和自动化设备两个板块下跌。截至上午收盘，沪指涨0.93%，深成指涨0.57%，创业板指跌0.05%。北向资金方面，沪股通早盘净流入2.65…
20230629	【华康医疗：签署建设工程施工合同】财联社6月29日电，华康医疗公告，公司为“武汉市肺科医院异地迁建项目医疗专项施工”的中标供应商，中标金额9168.6万元。同时，公司与武汉市肺科医院签署了《建设工程施工合同》。	18:27:17_x000D_ 【华康医疗：签署建设工程施工合同】财联社6月29日电，华康医疗公告，公司为“武汉市肺科医院异地迁建项目医疗专项施工”的中标供应商，中标金额9168.6万元。同时，公司与武汉市肺科医院签署了《建设工程施工合同》。
20230707	【兴业银锡：全资子公司银漫矿业复产】财联社7月7日电，兴业银锡公告，全资子公司银漫矿业选厂将于2023年7月10日起复产。	19:12:46_x000D_ 【兴业银锡：全资子公司银漫矿业复产】财联社7月7日电，兴业银锡公告，全资子公司银漫矿业选厂将于2023年7月10日起复产。
20230724	【海格通信：子公司预中标18.9亿元中国移动网络综合代维服务采购项目】财联社7月24日电，海格通信公告，中国移动采购与招标网近日发布了“中国移动通信集团2023年至2026年网络综合代维服务采购项目”多个地区的中选候选人公示，全资子公司海格怡创为共15个地区的中选候选人之一，预计整个服务周期中选合同金额18.9亿元，占公司最近一个经审计会计年度营业收入的33.66%，若海格怡创能够签订正式项目合同并顺利实施，将对公司及海格怡创在通信服务行业的地位和2023年至2026年业绩增长带来积极促进作用。	17:35:16_x000D_ 【海格通信：子公司预中标18.9亿元中国移动网络综合代维服务采购项目】财联社7月24日电，海格通信公告，中国移动采购与招标网近日发布了“中国移动通信集团2023年至2026年网络综合代维服务采购项目”多个地区的中选候选人公示，全资子公司海格怡创为共15个地区的中选候选人之一，预计整个服务周期中选合同金额18.9亿元，占公司最近一个经审计会计年度营业收入的33.66%，若海格怡创能够签订正式项目合同并顺利实施，将对公司及海格怡创在通信服务行业的地位和2023年至2026年业绩增长带来积极促进作用。
20230417	【午评：沪指涨近1%创年内新高 券商、中字头等蓝筹股集体走强】财联社4月17日电，市场早盘低开后震荡反弹，三大指数走势分化，沪指涨近1%创年内新高，创业板指冲高回落。盘面上，券商股开盘拉升，东北证券涨停，中泰证券接近涨停。家电股开盘大涨，北鼎股份涨超10%，长虹美菱、海信家电、小熊电器涨停。油气股震荡走强，新潮能源涨停，中国石油涨近5%。中字头个股再度活跃，中铝国际、中工国际涨停，中国移动盘中涨近5%，AH总市值超1.3万亿。整体上蓝筹股早盘表现偏强。下跌方面，AI应用方向集体调整，博汇科技、山大地纬跌超10%，天下秀、海量数据跌停。总体上个股上涨和下跌家数基本相当。沪深两市今日成交额7289亿，较上个交易日放量55亿。板块方面，家电、油气、证券、机场等板块涨幅居前，传媒、手机游戏、ChatGPT、数据要素等板块跌幅居前。截至上午收盘，沪指涨0.98%，深成指涨0.18%，创业板指跌0.…	11:32:33_x000D_ 【午评：沪指涨近1%创年内新高 券商、中字头等蓝筹股集体走强】财联社4月17日电，市场早盘低开后震荡反弹，三大指数走势分化，沪指涨近1%创年内新高，创业板指冲高回落。盘面上，券商股开盘拉升，东北证券涨停，中泰证券接近涨停。家电股开盘大涨，北鼎股份涨超10%，长虹美菱、海信家电、小熊电器涨停。油气股震荡走强，新潮能源涨停，中国石油涨近5%。中字头个股再度活跃，中铝国际、中工国际涨停，中国移动盘中涨近5%，AH总市值超1.3万亿。整体上蓝筹股早盘表现偏强。下跌方面，AI应用方向集体调整，博汇科技、山大地纬跌超10%，天下秀、海量数据跌停。总体上个股上涨和下跌家数基本相当。沪深两市今日成交额7289亿，较上个交易日放量55亿。板块方面，家电、油气、证券、机场等板块涨幅居前，传媒、手机游戏、ChatGPT、数据要素等板块跌幅居前。截至上午收盘，沪指涨0.98%，深…
20230427	【收评：沪指低开高走涨0.67% AI概念股午后掀跌停潮】财联社4月27日电，大盘全天低开高走，创业板指领涨。盘面上，医药股集体走强，普蕊斯、金石亚药20CM涨停，拓新药业涨超10%，盘龙药业、千金药业涨停。眼科医疗概念股继续活跃，何氏眼科2连，普瑞眼科涨超17%。保险股震荡走强，中国平安涨停，新华保险、中国太保涨超6%。船舶概念股午后异动，国瑞科技涨超10%，中船科技涨停。下跌方面，AI概念股全线大跌掀跌停潮，中文在线、中石科技20CM跌停，三六零、剑桥科技、上海电影、浙数文化、视觉中国等多股跌停。总体上个股涨多跌少，两市超2500只个股上涨。沪深两市今日成交额10449亿，较上个交易日缩量773亿。板块方面，中船系、新冠药、中药、眼科医疗等板块涨幅居前，液冷、手机游戏、CPO、传媒等板块跌幅居前。截至收盘，沪指涨0.67%，深成指涨0.28%，创业板指涨0.58%。北向资金全天净买入…	15:02:26_x000D_ 【收评：沪指低开高走涨0.67% AI概念股午后掀跌停潮】财联社4月27日电，大盘全天低开高走，创业板指领涨。盘面上，医药股集体走强，普蕊斯、金石亚药20CM涨停，拓新药业涨超10%，盘龙药业、千金药业涨停。眼科医疗概念股继续活跃，何氏眼科2连，普瑞眼科涨超17%。保险股震荡走强，中国平安涨停，新华保险、中国太保涨超6%。船舶概念股午后异动，国瑞科技涨超10%，中船科技涨停。下跌方面，AI概念股全线大跌掀跌停潮，中文在线、中石科技20CM跌停，三六零、剑桥科技、上海电影、浙数文化、视觉中国等多股跌停。总体上个股涨多跌少，两市超2500只个股上涨。沪深两市今日成交额10449亿，较上个交易日缩量773亿。板块方面，中船系、新冠药、中药、眼科医疗等板块涨幅居前，液冷、手机游戏、CPO、传媒等板块跌幅居前。截至收盘，沪指涨0.67%，深成指涨0.28%，创业板指…
20230617	【江西工职院“6·1”食品安全事件调查处理情况公布：判定异物为老鼠类啮齿动物的头部】财联社6月17日电，江西工业职业技术学院“6·1”食品安全事件调查结果公布，针对江西工业职业技术学院“6·1”食品安全事件，江西省教育厅、省公安厅、省国资委、省市场监督管理局组成的联合调查组，本着实事求是原则开展调查，现将有关情况通报如下。联合调查组经勘查现场，调取监控视频发现，6月1日，学生在食堂吃出疑似为“鼠头”的异物，被涉事食堂工作人员事发当日丢弃。通过查看食堂后厨视频，查阅采购清单，询问涉事食堂负责人、后厨相关当事人、当事学生和现场围观学生等，判定异物不是鸭脖。根据国内权威动物专家对提取的当事学生所拍现场照片和视频进行专业辨识，判定异物为老鼠类啮齿动物的头部。南昌高新区市场监督管理局昌东分局、江西工业职业技术学院未认真调查取证，发布“异物为鸭脖”结论是错误的。经认定，江西工业职业技术学院对此次事件…	12:31:37_x000D_ 【江西工职院“6·1”食品安全事件调查处理情况公布：判定异物为老鼠类啮齿动物的头部】财联社6月17日电，江西工业职业技术学院“6·1”食品安全事件调查结果公布，针对江西工业职业技术学院“6·1”食品安全事件，江西省教育厅、省公安厅、省国资委、省市场监督管理局组成的联合调查组，本着实事求是原则开展调查，现将有关情况通报如下。_x000D_ _x000D_ _x000D_ _x000D_ 联合调查组经勘查现场，调取监控视频发现，6月1日，学生在食堂吃出疑似为“鼠头”的异物，被涉事食堂工作人员事发当日丢弃。通过查看食堂后厨视频，查阅采购清单，询问涉事食堂负责人、后厨相关当事人、当事学生和现场围观学生等，判定异物不是鸭脖。根据国内权威动物专家对提取的当事学生所拍现场照片和视频进行专业辨识，判定异物为老鼠类啮齿动物的头部。南昌高新区市场监督管理局昌东分局、江西工业职…
20230620	【大华股份：后续拟对子公司进行增资等事宜 推进公司在热成像领域发展】财联社6月20日电，大华股份披露股票交易异常波动的公告，为推进公司在热成像领域持续稳定发展，公司后续拟对控股子公司浙江华感科技有限公司进行增资并围绕其开展股权激励等事宜，后续公司将严格按照相关法律法规的要求，根据上述事项进展情况及时履行审议程序和信息披露义务。	19:00:50_x000D_ 【大华股份：后续拟对子公司进行增资等事宜 推进公司在热成像领域发展】财联社6月20日电，大华股份披露股票交易异常波动的公告，为推进公司在热成像领域持续稳定发展，公司后续拟对控股子公司浙江华感科技有限公司进行增资并围绕其开展股权激励等事宜，后续公司将严格按照相关法律法规的要求，根据上述事项进展情况及时履行审议程序和信息披露义务。
20230628	【江海股份：CPU、GPU周边必用MLPC产品已获技术性能重大突破】财联社6月28日电，江海股份在互动平台表示，公司已给多家服务器生产商批量提供电源部分用电容器，CPU、GPU周边必用的MLPC产品已获技术性能重大突破，正在相关用户进行测试、认定，前景非常广阔。	11:00:15_x000D_ 【江海股份：CPU、GPU周边必用MLPC产品已获技术性能重大突破】财联社6月28日电，江海股份在互动平台表示，公司已给多家服务器生产商批量提供电源部分用电容器，CPU、GPU周边必用的MLPC产品已获技术性能重大突破，正在相关用户进行测试、认定，前景非常广阔。
20230712	【福事特中签号出炉 共4万个】财联社7月12日电，福事特披露首次公开发行股票网上中签结果，中签号码共有40000个，每个中签号码只能认购500股福事特股票。	21:23:32_x000D_ 【福事特中签号出炉 共4万个】财联社7月12日电，福事特披露首次公开发行股票网上中签结果，中签号码共有40000个，每个中签号码只能认购500股福事特股票。
20230713	【金达威：拟发行可转债募资不超过18.24亿元】财联社7月13日电，金达威公告，拟发行可转债募资不超过18.24亿元，用于辅酶Q10改扩建项目、年产10000吨泛酸钙建设项目、年产30000吨阿洛酮糖、年产5000吨肌醇建设项目、信息化系统建设项目、补充流动资金。	16:56:47_x000D_ 【金达威：拟发行可转债募资不超过18.24亿元】财联社7月13日电，金达威公告，拟发行可转债募资不超过18.24亿元，用于辅酶Q10改扩建项目、年产10000吨泛酸钙建设项目、年产30000吨阿洛酮糖、年产5000吨肌醇建设项目、信息化系统建设项目、补充流动资金。
20230714	【“小牛资本”非法集资案一审宣判：实控人彭铁被判处无期徒刑】财联社7月14日电，据深圳市中级人民法院，2023年7月14日，广东省深圳市中级人民法院对小牛资本管理集团有限公司主要负责人彭铁等26人非法集资案一审公开宣判。小牛集团法定代表人、实控人彭铁因犯集资诈骗罪、非法吸收公众存款罪，被判处无期徒刑，剥夺政治权利终身，并处没收个人全部财产。其他25名被告人因参与集资犯罪，被判处有期徒刑十一年至二年，并处罚金。法院审理查明：2013年1月至2021年1月，彭铁等人成立小牛集团以及“小牛投资”“小牛新财富”“小牛基金”等子公司后，以P2P网贷及私募理财产品形式向131万人非法吸收公众存款1026亿元，其中126亿元未偿还。期间，彭铁、彭钢等6人明知集团资金缺口巨大、坏账率畸高，仍继续进行非法集资活动，且将所募资金主要用于还本付息及彭铁个人支配使用，集资诈骗89.34亿元。	14:31:03_x000D_ 【“小牛资本”非法集资案一审宣判：实控人彭铁被判处无期徒刑】财联社7月14日电，据深圳市中级人民法院，2023年7月14日，广东省深圳市中级人民法院对小牛资本管理集团有限公司主要负责人彭铁等26人非法集资案一审公开宣判。小牛集团法定代表人、实控人彭铁因犯集资诈骗罪、非法吸收公众存款罪，被判处无期徒刑，剥夺政治权利终身，并处没收个人全部财产。其他25名被告人因参与集资犯罪，被判处有期徒刑十一年至二年，并处罚金。_x000D_ _x000D_ _x000D_ _x000D_ 法院审理查明：2013年1月至2021年1月，彭铁等人成立小牛集团以及“小牛投资”“小牛新财富”“小牛基金”等子公司后，以P2P网贷及私募理财产品形式向131万人非法吸收公众存款1026亿元，其中126亿元未偿还。期间，彭铁、彭钢等6人明知集团资金缺口巨大、坏账率畸高，仍继续进行非法集资活…
20230907	【投资日历：周四资本市场大事提醒】①今日共有1只新股申购，为创业板的崇德科技(301548)。②商务部将于9月7日召开9月第1次例行新闻发布会，介绍近期商务领域重点工作有关情况。③国务院新闻办公室将于9月7日举行国务院政策例行吹风，介绍延续、优化、完善减税降费政策，推动经济平稳健康发展有关情况。④全球金融科技大会“2023 inclusion·外滩大会”定于9月7日至9月9日在上海举办。⑤蚂蚁集团将于9月7日开幕的外滩大会上发布自研大模型的最新落地进展。⑥腾讯全球数字生态大会将于9月7日至8日举办，腾讯集团副总裁蒋杰将发布关于腾讯混元大模型的演讲。⑦第五届“丝路海运”国际合作论坛将于9月7日至8日在福建厦门举行。⑧2023中国(郑州)国际期货论坛将于9月7日至8日在郑州举行。⑨2023世界显示产业大会将于9月7日在成都举行。⑩俄中“萌芽”论坛将于9月7日至8日在喀山举行。⑪第五届海峡两岸…	07:45:30_x000D_ 【投资日历：周四资本市场大事提醒】_x000D_ _x000D_ ①今日共有1只新股申购，为创业板的崇德科技(301548)。_x000D_ _x000D_ ②商务部将于9月7日召开9月第1次例行新闻发布会，介绍近期商务领域重点工作有关情况。_x000D_ _x000D_ ③国务院新闻办公室将于9月7日举行国务院政策例行吹风，介绍延续、优化、完善减税降费政策，推动经济平稳健康发展有关情况。_x000D_ _x000D_ ④全球金融科技大会“2023 inclusion·外滩大会”定于9月7日至9月9日在上海举办。_x000D_ _x000D_ ⑤蚂蚁集团将于9月7日开幕的外滩大会上发布自研大模型的最新落地进展。_x000D_ _x000D_ ⑥腾讯全球数字生态大会将于9月7日至8日举办，腾讯集团副总裁蒋杰将发布关于腾讯混元大模型的演讲。_x000D_ _x…
20230911	【拜登再次表示不愿与中国脱钩】财联社9月11日电，拜登当地时间9月10日在越南进行国事访问时发表了演讲。在谈到中国时他表示，自己很真诚地想处理好与中国的关系，不希望与中国脱钩。他不会向中国出售制造核武器的材料，但也并不想伤害中国。 (CGTN记者团 )	14:14:27_x000D_ 【拜登再次表示不愿与中国脱钩】财联社9月11日电，拜登当地时间9月10日在越南进行国事访问时发表了演讲。在谈到中国时他表示，自己很真诚地想处理好与中国的关系，不希望与中国脱钩。他不会向中国出售制造核武器的材料，但也并不想伤害中国。 (CGTN记者团 )
20230724	【午评：三大指数涨跌不一 AI算力概念股集体反弹】财联社7月24日电，市场早盘走势分化，沪指震荡微涨，创业板指冲高回落。盘面上，AI概念股展开反弹，算力方向领涨，鸿博股份、云赛智联涨停，浪潮信息一度涨停。房地产、基建板块探底回升，山水比德20CM涨停，金科股份、柯利达涨停。医药股盘中活跃，创新药方向领涨，景峰医药涨停，百利天恒涨超5%。下跌方面，食品概念股陷入调整，桂发祥跌超7%。总体上个股涨多跌少，两市超2600只个股上涨。沪深两市今日成交额4363亿，较上个交易日放量13亿。板块方面，算力租赁、CPO、东数西算、建筑装饰等板块涨幅居前，草甘膦、食品加工、养殖、小金属等板块跌幅居前。截至收盘，沪指涨0.08%，深成指跌0.33%，创业板指跌0.68%。北向资金方面，沪股通早盘净流出5.02亿，深股通早盘净流出31.71亿。	11:32:16_x000D_ 【午评：三大指数涨跌不一 AI算力概念股集体反弹】财联社7月24日电，市场早盘走势分化，沪指震荡微涨，创业板指冲高回落。盘面上，AI概念股展开反弹，算力方向领涨，鸿博股份、云赛智联涨停，浪潮信息一度涨停。房地产、基建板块探底回升，山水比德20CM涨停，金科股份、柯利达涨停。医药股盘中活跃，创新药方向领涨，景峰医药涨停，百利天恒涨超5%。下跌方面，食品概念股陷入调整，桂发祥跌超7%。总体上个股涨多跌少，两市超2600只个股上涨。沪深两市今日成交额4363亿，较上个交易日放量13亿。板块方面，算力租赁、CPO、东数西算、建筑装饰等板块涨幅居前，草甘膦、食品加工、养殖、小金属等板块跌幅居前。截至收盘，沪指涨0.08%，深成指跌0.33%，创业板指跌0.68%。北向资金方面，沪股通早盘净流出5.02亿，深股通早盘净流出31.71亿。
20230808	【蒙草生态：中标呼和浩特经济技术开发区2.25亿元工程项目】财联社8月8日电，蒙草生态公告，中标呼和浩特经济技术开发区经济技术产业园区道路提升改造工程一标段(环境综合提升改造工程EPC总承包)，中标金额约2.25亿元。	17:34:12_x000D_ 【蒙草生态：中标呼和浩特经济技术开发区2.25亿元工程项目】财联社8月8日电，蒙草生态公告，中标呼和浩特经济技术开发区经济技术产业园区道路提升改造工程一标段(环境综合提升改造工程EPC总承包)，中标金额约2.25亿元。
20230814	【东亚机械：收到公司土地被纳入征收范围告知函】财联社8月14日电，东亚机械公告，收到厦门市同安区人民政府西柯街道办事处下发的《告知函》，公司位于厦门市同安区西柯街道西柯街611号的现有厂区位于规划部署征收范围内，征收实施单位将按实际工作进度序时推进征收范围内的土地征收工作，实际征收公司土地的具体时间尚未确定，预计目前不会对公司的生产经营产生重大不利影响。	16:42:41_x000D_ 【东亚机械：收到公司土地被纳入征收范围告知函】财联社8月14日电，东亚机械公告，收到厦门市同安区人民政府西柯街道办事处下发的《告知函》，公司位于厦门市同安区西柯街道西柯街611号的现有厂区位于规划部署征收范围内，征收实施单位将按实际工作进度序时推进征收范围内的土地征收工作，实际征收公司土地的具体时间尚未确定，预计目前不会对公司的生产经营产生重大不利影响。
20230828	17:29 _x000D_ [[+_+]]_x000D_ 专享 专享_x000D_ 【风口研报·公司】我国核聚变取得重大进展，公司已承接了海外核聚变工程项目的新订单，且上半年营收达历史同期最高值，分析师预计下半年仍将保持较快增速；另有公司股	17:29 _x000D_ [[+_+]]_x000D_ 专享 专享_x000D_ 【风口研报·公司】我国核聚变取得重大进展，公司已承接了海外核聚变工程项目的新订单，且上半年营收达历史同期最高值，分析师预计下半年仍将保持较快增速；另有公司股息率超过6%，逆势中长期分红回馈股东 解锁直达>>
20230901	【午评：沪指缩量反弹涨0.23% 大消费股集体走强】财联社9月1日电，市场早盘冲高回落，三大指数涨跌不一。盘面上，大消费股集体走强，零售、食品等方向领涨，人人乐、中央商场、麦趣尔等涨停。煤炭、有色等周期股展开反弹，云煤能源、陕西黑猫涨停。杭州亚运会概念股盘中异动，杭州园林20CM涨停，杭州解百、中装建设涨停。家居家装股震荡走强，我乐家居5连板，江山欧派等涨停。下跌方面，次新股陷入调整，泰凌微、盛邦安全等跌超10%。总体上个股跌多涨少，两市超2600只个股下跌。沪深两市今日成交额4810亿，较上个交易日缩量480亿。板块方面，煤炭、食品、零售、汽车整车等板块涨幅居前，科创次新股、核污染防治、医药商业、数据安全等板块跌幅居前。截至收盘，沪指跌涨0.23%，深成指涨0.25%，创业板指跌0.23%。沪深股通因台风今日暂停交易。	11:32:14_x000D_ 【午评：沪指缩量反弹涨0.23% 大消费股集体走强】财联社9月1日电，市场早盘冲高回落，三大指数涨跌不一。盘面上，大消费股集体走强，零售、食品等方向领涨，人人乐、中央商场、麦趣尔等涨停。煤炭、有色等周期股展开反弹，云煤能源、陕西黑猫涨停。杭州亚运会概念股盘中异动，杭州园林20CM涨停，杭州解百、中装建设涨停。家居家装股震荡走强，我乐家居5连板，江山欧派等涨停。下跌方面，次新股陷入调整，泰凌微、盛邦安全等跌超10%。总体上个股跌多涨少，两市超2600只个股下跌。沪深两市今日成交额4810亿，较上个交易日缩量480亿。板块方面，煤炭、食品、零售、汽车整车等板块涨幅居前，科创次新股、核污染防治、医药商业、数据安全等板块跌幅居前。截至收盘，沪指跌涨0.23%，深成指涨0.25%，创业板指跌0.23%。沪深股通因台风今日暂停交易。
20230908	【华峰超纤：公司antelope绒面产品等现已在3C消费电子行业龙头客户得以应用】财联社9月8日电，华峰超纤在互动平台表示，公司的antelope绒面产品、水性绒面产品等现已在3C消费电子行业龙头客户得以应用，因涉及商业保密条款，具体合作客户及合作内容未经客户允许不可向第三方披露。	10:46:15_x000D_ 【华峰超纤：公司antelope绒面产品等现已在3C消费电子行业龙头客户得以应用】财联社9月8日电，华峰超纤在互动平台表示，公司的antelope绒面产品、水性绒面产品等现已在3C消费电子行业龙头客户得以应用，因涉及商业保密条款，具体合作客户及合作内容未经客户允许不可向第三方披露。
20230904	【中信证券：活跃交易型资金对量化存在误解和忌惮 加强量化交易监控会缓解其焦虑】财联社9月4日电，中信证券最新发布研报称，活跃交易型资金对量化存在误解和忌惮，加强量化交易监控会缓解其焦虑。量化交易并不是影响市场趋势的主因。首先，量化私募几乎都是满仓运作，单日卖出量和买入量几乎相等，也并不通过大盘涨跌去获利；其次，量化交易在 A 股成交额中的占比不足 20%，极少会采用大单去影响趋势；最后，类似 8 月 28 日的因意外信息因素导致大幅高开的交易日，在历史上样本极少，量化无法通过小样本的事件去寻找交易策略。尽管量化和主观策略都是资管行业的组成部分，但在运行模式上量化更类似于科技行业，中间的壁垒和不透明不可避免的会影响市场传统交易者的心态，甚至影响其交易动作和策略。中信证券研究团队认为，监管在近期加强了程序化交易的监管和信息报送，未来或缓解投资者焦虑。	08:58:35_x000D_ 【中信证券：活跃交易型资金对量化存在误解和忌惮 加强量化交易监控会缓解其焦虑】财联社9月4日电，中信证券最新发布研报称，活跃交易型资金对量化存在误解和忌惮，加强量化交易监控会缓解其焦虑。量化交易并不是影响市场趋势的主因。首先，量化私募几乎都是满仓运作，单日卖出量和买入量几乎相等，也并不通过大盘涨跌去获利；其次，量化交易在 A 股成交额中的占比不足 20%，极少会采用大单去影响趋势；最后，类似 8 月 28 日的因意外信息因素导致大幅高开的交易日，在历史上样本极少，量化无法通过小样本的事件去寻找交易策略。尽管量化和主观策略都是资管行业的组成部分，但在运行模式上量化更类似于科技行业，中间的壁垒和不透明不可避免的会影响市场传统交易者的心态，甚至影响其交易动作和策略。中信证券研究团队认为，监管在近期加强了程序化交易的监管和信息报送，未来或缓解投资者焦虑。
20230904	21:07 _x000D_ [[+_+]]_x000D_ 专享 专享_x000D_ 【财联社早知道】刚刚官宣！华为鸿蒙4升级用户突破1000万，携手开发者步入生态快车道，这家公司的手写签批智能终端设备成功适配华为鸿蒙；腾讯近期将对外发布混元	21:07 _x000D_ [[+_+]]_x000D_ 专享 专享_x000D_ 【财联社早知道】刚刚官宣！华为鸿蒙4升级用户突破1000万，携手开发者步入生态快车道，这家公司的手写签批智能终端设备成功适配华为鸿蒙；腾讯近期将对外发布混元大模型，C端应用有望加速发展 解锁直达>>
20230911	07:12 _x000D_ [[+_+]]_x000D_ 专享 专享_x000D_ 【研选】华为全联接大会即将召开，产业链出现多个积极变化，分析师看好卫星互联网终端应用等环节；公司受益于Mini LED背光在电视、车载显示等领域渗透率提升趋	07:12 _x000D_ [[+_+]]_x000D_ 专享 专享_x000D_ 【研选】华为全联接大会即将召开，产业链出现多个积极变化，分析师看好卫星互联网终端应用等环节；公司受益于Mini LED背光在电视、车载显示等领域渗透率提升趋势，车载显示业务有望成为新的业绩增长点 解锁直达>>
20230419	【午间公告】财联社4月19日电，多家公司发布午间公告，具体如下：①国创高新：2013年3月公司与国苑置业、国创地产签订《投资协议》，约定三方共同设立项目公司（即光谷地产）进行合作建房。公司投资总额为2亿元，光谷地产项目完工后，各方保证公司能够分配到不少于3.50万平方米房产。但光谷地产未能按期交房。经协议各方多次协商，国创科技拟以“国创未来研产中心”项目的房产置换光谷地产拟向公司交付的前述房产，公司同意接受国创科技以“国创未来研产中心”项目的房产作为置换。公司拟以光谷地产应交付的“国创·光谷上城”项目三期S1楼35000平方米房产与国创科技持有的“国创未来研产中心”项目36555.61平方米房产进行置换。“国创未来研产中心”位于武汉新城中心片区，地理位置优越，交通便利，规划为工业区，有利于公司建设“研发中心”项目，有利于未来公司聚焦新材料业务。本次交易构成关联交易。②怡合达：向特定对象发…	12:27:52_x000D_ 【午间公告】财联社4月19日电，多家公司发布午间公告，具体如下：_x000D_ _x000D_ ①国创高新：2013年3月公司与国苑置业、国创地产签订《投资协议》，约定三方共同设立项目公司（即光谷地产）进行合作建房。公司投资总额为2亿元，光谷地产项目完工后，各方保证公司能够分配到不少于3.50万平方米房产。但光谷地产未能按期交房。经协议各方多次协商，国创科技拟以“国创未来研产中心”项目的房产置换光谷地产拟向公司交付的前述房产，公司同意接受国创科技以“国创未来研产中心”项目的房产作为置换。公司拟以光谷地产应交付的“国创·光谷上城”项目三期S1楼35000平方米房产与国创科技持有的“国创未来研产中心”项目36555.61平方米房产进行置换。“国创未来研产中心”位于武汉新城中心片区，地理位置优越，交通便利，规划为工业区，有利于公司建设“研发中心”项目，有利于未来…
20230508	【比亚迪王传福：望在越南继续扩大制造与投资规模 盼获便利以尽快投运电动汽车项目】财联社5月8日电，据越通社消息，5日下午，越南政府副总理陈红河在河内会见比亚迪董事长王传福。王传福表示，比亚迪希望继续扩大富寿省制造与投资规模，并承诺新一步改进技术，实现可持续发展。王传福称，比亚迪将使用最佳技术扩展到电动汽车制造和组装领域，服务于越南市场并出口到东南亚地区。他表示，希望当地政府为早日完成投资许可提供便利，尽快将电动汽车制造组装项目投入运行。	08:41:30_x000D_ 【比亚迪王传福：望在越南继续扩大制造与投资规模 盼获便利以尽快投运电动汽车项目】财联社5月8日电，据越通社消息，5日下午，越南政府副总理陈红河在河内会见比亚迪董事长王传福。王传福表示，比亚迪希望继续扩大富寿省制造与投资规模，并承诺新一步改进技术，实现可持续发展。王传福称，比亚迪将使用最佳技术扩展到电动汽车制造和组装领域，服务于越南市场并出口到东南亚地区。他表示，希望当地政府为早日完成投资许可提供便利，尽快将电动汽车制造组装项目投入运行。
20230609	【午评：沪指窄幅震荡微涨 汽车产业链多股涨停】财联社6月9日电，市场早盘冲高回落，三大指数涨跌不一。盘面上，汽车产业链个股受利好刺激开盘走强，中通客车、亚星客车、泰祥股份、超达装备等多股涨停。AI概念股表现分化，CPO方向再度大涨，太辰光20CM涨停；算力方向震荡走强，拓维信息2连板，华胜天成、智微智能涨停；游戏、传媒股展开反弹，世纪华通、读者传媒涨停；此外多只AI高位股盘中跳水，金桥信息一度触及跌停。下跌方面，地产基建股陷入调整，蕾奥规划、京能置业跌超5%。总体上个股跌多涨少，两市超2700只个股下跌。沪深两市今日成交额5640亿，较上个交易日放量268亿。板块方面，液冷服务器、汽车整车、CPO、CRO等板块涨幅居前，混合现实、建筑装饰、新型城镇化、复合集流体等板块跌幅居前。截至上午收盘，沪指涨0.03%，深成指跌0.05%，创业板指跌0.1%。北向资金方面，沪股通早盘净流出0.68亿…	11:33:12_x000D_ 【午评：沪指窄幅震荡微涨 汽车产业链多股涨停】财联社6月9日电，市场早盘冲高回落，三大指数涨跌不一。盘面上，汽车产业链个股受利好刺激开盘走强，中通客车、亚星客车、泰祥股份、超达装备等多股涨停。AI概念股表现分化，CPO方向再度大涨，太辰光20CM涨停；算力方向震荡走强，拓维信息2连板，华胜天成、智微智能涨停；游戏、传媒股展开反弹，世纪华通、读者传媒涨停；此外多只AI高位股盘中跳水，金桥信息一度触及跌停。下跌方面，地产基建股陷入调整，蕾奥规划、京能置业跌超5%。总体上个股跌多涨少，两市超2700只个股下跌。沪深两市今日成交额5640亿，较上个交易日放量268亿。板块方面，液冷服务器、汽车整车、CPO、CRO等板块涨幅居前，混合现实、建筑装饰、新型城镇化、复合集流体等板块跌幅居前。截至上午收盘，沪指涨0.03%，深成指跌0.05%，创业板指跌0.1%。北向资金…
20230615	【海南机场：5月旅客吞吐量同比增长294.92%】财联社6月15日电，海南机场公告，5月起降架次14504架次，同比增长164.77%；旅客吞吐量193.82万人次，同比增长294.92%。	17:57:55_x000D_ 【海南机场：5月旅客吞吐量同比增长294.92%】财联社6月15日电，海南机场公告，5月起降架次14504架次，同比增长164.77%；旅客吞吐量193.82万人次，同比增长294.92%。
20230621	【恒瑞医药：注射用瑞卡西单抗药品上市许可申请获受理】财联社6月21日电，恒瑞医药公告，子公司广东恒瑞医药收到国家药监局下发的受理通知书，公司提交的注射用瑞卡西单抗药品上市许可申请获国家药监局受理。	15:39:13_x000D_ 【恒瑞医药：注射用瑞卡西单抗药品上市许可申请获受理】财联社6月21日电，恒瑞医药公告，子公司广东恒瑞医药收到国家药监局下发的受理通知书，公司提交的注射用瑞卡西单抗药品上市许可申请获国家药监局受理。
20230330	【阿里首席财务官：业务集团上市后 会进一步评估是保持控制还是放弃控制】财联社3月30日电，在阿里巴巴电话会上，阿里首席财务官徐宏在回应哪个业务板块会先独立上市时表示，在所有的业务板块和业务公司里，除了现在淘宝天猫商业集团之外，其他所有的业务集团和业务公司都会形成可独立融资和分拆，包括寻找独立上市主体，阿里认为整个市场是最好的试金石，“未来所有具备条件的业务集团和公司，当他们都有独立融资和上市的主体后，我们会准备好一个上一个。在它们上市后，会进一步评估他们对整个阿里集团的重要性，来决定是不是保持控制，还是可以放弃控制。”徐宏表示，阿里现有的股票回购计划不会改变，未来还将通过现金流的评估来判断是否继续回购，同时在整体投资的组合中，通过从非重点投资公司的一二级市场变现模式，来持续改善资本结构。	08:21_x000D_ 【阿里首席财务官：业务集团上市后 会进一步评估是保持控制还是放弃控制】财联社3月30日电，在阿里巴巴电话会上，阿里首席财务官徐宏在回应哪个业务板块会先独立上市时表示，在所有的业务板块和业务公司里，除了现在淘宝天猫商业集团之外，其他所有的业务集团和业务公司都会形成可独立融资和分拆，包括寻找独立上市主体，阿里认为整个市场是最好的试金石，“未来所有具备条件的业务集团和公司，当他们都有独立融资和上市的主体后，我们会准备好一个上一个。在它们上市后，会进一步评估他们对整个阿里集团的重要性，来决定是不是保持控制，还是可以放弃控制。”徐宏表示，阿里现有的股票回购计划不会改变，未来还将通过现金流的评估来判断是否继续回购，同时在整体投资的组合中，通过从非重点投资公司的一二级市场变现模式，来持续改善资本结构。
20230403	【拓日新能：预计子公司停产整改期限将延长一个月】财联社4月3日电，拓日新能公告全资子公司陕西拓日部分光伏玻璃产线停产整改的进展：整改期间陕西拓日自行整改并安装的环保设备目前正等待环保部门验收，验收通过后光伏玻璃（原片）产线将逐步恢复生产。此外陕西拓日采购了全新的进口尘硝一体化环保设备和烟气在线监测升级设备，目前新设备正在海运运输途中，运达安装后可长期投入使用。现由于整改工作未全部完成，预计本次停产整改期限将延长一个月，具体复产时间公司将另行公告。	18:20:01_x000D_ 【拓日新能：预计子公司停产整改期限将延长一个月】财联社4月3日电，拓日新能公告全资子公司陕西拓日部分光伏玻璃产线停产整改的进展：整改期间陕西拓日自行整改并安装的环保设备目前正等待环保部门验收，验收通过后光伏玻璃（原片）产线将逐步恢复生产。此外陕西拓日采购了全新的进口尘硝一体化环保设备和烟气在线监测升级设备，目前新设备正在海运运输途中，运达安装后可长期投入使用。现由于整改工作未全部完成，预计本次停产整改期限将延长一个月，具体复产时间公司将另行公告。
20230727	【永鼎股份：全资孙公司获得国内某主流汽车公司线束项目定点通知书】财联社7月27日电，永鼎股份公告，全资孙公司金亭线束获得国内某主流汽车公司某款车型低压线束业务定点通知书，正式授权启动线束样件准备工作。本次项目生命周期为7年，全生命周期销售额合计约为8.95亿元。	17:16:23_x000D_ 【永鼎股份：全资孙公司获得国内某主流汽车公司线束项目定点通知书】财联社7月27日电，永鼎股份公告，全资孙公司金亭线束获得国内某主流汽车公司某款车型低压线束业务定点通知书，正式授权启动线束样件准备工作。本次项目生命周期为7年，全生命周期销售额合计约为8.95亿元。
20230728	【乐鑫科技：2023年上半年净利润同比增长2.05%】《科创板日报》28日讯，乐鑫科技发布2023年半年度报告，上半年公司实现营业收入6.67亿元，较上年同期同比增长8.66%；归属于母公司所有者的净利润6457.03万元，同比增长2.05%。	16:13:09_x000D_ 【乐鑫科技：2023年上半年净利润同比增长2.05%】《科创板日报》28日讯，乐鑫科技发布2023年半年度报告，上半年公司实现营业收入6.67亿元，较上年同期同比增长8.66%；归属于母公司所有者的净利润6457.03万元，同比增长2.05%。
20230801	【德龙激光：天龙重工拟减持不超过1.14%股份】财联社8月1日电，德龙激光公告，股东天龙重工拟减持不超过118万股，即不超过公司总股本的1.14%。	19:18:33_x000D_ 【德龙激光：天龙重工拟减持不超过1.14%股份】财联社8月1日电，德龙激光公告，股东天龙重工拟减持不超过118万股，即不超过公司总股本的1.14%。
20230812	【中信证券：美股反弹或已接近尾声 未来总体走势或易跌难涨】财联社8月12日电，中信证券发布研报指出，美国7月通胀数据基本符合预期，基数效应逐渐消退。美国通胀正直面粘性考验，通胀中枢明显反弹的风险较小。维持7月大概率为美联储本轮最后一次加息、年内额外加息的门槛是通胀环比持续高于0.4%的判断。预计十年期美债利率与美元指数短期维持高位震荡、难有显著下行趋势。美股反弹或已接近尾声，未来总体走势或易跌难涨。	14:53:39_x000D_ 【中信证券：美股反弹或已接近尾声 未来总体走势或易跌难涨】财联社8月12日电，中信证券发布研报指出，美国7月通胀数据基本符合预期，基数效应逐渐消退。美国通胀正直面粘性考验，通胀中枢明显反弹的风险较小。维持7月大概率为美联储本轮最后一次加息、年内额外加息的门槛是通胀环比持续高于0.4%的判断。预计十年期美债利率与美元指数短期维持高位震荡、难有显著下行趋势。美股反弹或已接近尾声，未来总体走势或易跌难涨。
20230817	【上海谊众：上半年净利同比增70.73%】财联社8月17日电，上海谊众披露半年报，上半年公司实现营业收入2亿元，同比增长178.88%；净利润1.04亿元，同比增长70.73%；基本每股收益0.66元。	17:29:24_x000D_ 【上海谊众：上半年净利同比增70.73%】财联社8月17日电，上海谊众披露半年报，上半年公司实现营业收入2亿元，同比增长178.88%；净利润1.04亿元，同比增长70.73%；基本每股收益0.66元。
20230606	【广州港：5月预计完成货物吞吐量4716.2万吨 同比增长4.6%】财联社6月6日电，广州港公告，5月公司预计完成集装箱吞吐量209万标准箱，同比增长11.5%；预计完成货物吞吐量4716.2万吨，同比增长4.6%。1-5月公司预计完成集装箱吞吐量938.6万标准箱，同比增长4.9%；预计完成货物吞吐量22363.7万吨，同比增长4.3%。	16:25:39_x000D_ 【广州港：5月预计完成货物吞吐量4716.2万吨 同比增长4.6%】财联社6月6日电，广州港公告，5月公司预计完成集装箱吞吐量209万标准箱，同比增长11.5%；预计完成货物吞吐量4716.2万吨，同比增长4.6%。1-5月公司预计完成集装箱吞吐量938.6万标准箱，同比增长4.9%；预计完成货物吞吐量22363.7万吨，同比增长4.3%。
20230608	【金桥信息：目前没有人工智能相关业务直接产生的收入】财联社6月8日电，金桥信息披露股票交易风险提示公告，公司主营业务是为客户提供信息化解决方案及服务，包括系统集成服务及软件开发服务。公司目前没有人工智能相关业务直接产生的收入。	19:49:58_x000D_ 【金桥信息：目前没有人工智能相关业务直接产生的收入】财联社6月8日电，金桥信息披露股票交易风险提示公告，公司主营业务是为客户提供信息化解决方案及服务，包括系统集成服务及软件开发服务。公司目前没有人工智能相关业务直接产生的收入。
20230626	【东方电热：预镀镍材料动力类客户材料性能验证已基本完成】财联社6月26日电，东方电热在接受机构调研时表示，预镀镍材料的动力类客户材料性能验证已基本完成，比如东山精密、无锡金杨、亿纬、科达利、LG 等,目前正在进行后续验证。由于动力类预镀镍材料验证周期较长，公司目前主攻消费电池领域的客户推广和快速导入，新产线生产的产品已陆续在一些新开发的客户做验证推广，如江苏海四达、蜂巢新能源、海金杜门等，反馈结果良好，部分已通过验证。	13:59:18_x000D_ 【东方电热：预镀镍材料动力类客户材料性能验证已基本完成】财联社6月26日电，东方电热在接受机构调研时表示，预镀镍材料的动力类客户材料性能验证已基本完成，比如东山精密、无锡金杨、亿纬、科达利、LG 等,目前正在进行后续验证。由于动力类预镀镍材料验证周期较长，公司目前主攻消费电池领域的客户推广和快速导入，新产线生产的产品已陆续在一些新开发的客户做验证推广，如江苏海四达、蜂巢新能源、海金杜门等，反馈结果良好，部分已通过验证。
20230630	【丰立智能：精密减速器产品未应用于人型机器人领域，暂无签署合作协议】财联社6月30日电，丰立智能公告，公司生产的精密减速器产品未应用于人型机器人领域，暂无签署合作协议；延伸到应用于传统机器人行业的精密减速器和新能源汽车行业的动力传动齿轮、汽车的座舱智能驱动等产品其相关业务量占公司总体规模比重较小，不会对公司经营业绩产生重大影响。	19:59:14_x000D_ 【丰立智能：精密减速器产品未应用于人型机器人领域，暂无签署合作协议】财联社6月30日电，丰立智能公告，公司生产的精密减速器产品未应用于人型机器人领域，暂无签署合作协议；延伸到应用于传统机器人行业的精密减速器和新能源汽车行业的动力传动齿轮、汽车的座舱智能驱动等产品其相关业务量占公司总体规模比重较小，不会对公司经营业绩产生重大影响。
20230602	【拜登出席毕业典礼被绊倒 白宫称总统无大碍】财联社6月2日电，美国有线电视新闻网（CNN）消息，当地时间6月1日，美国总统拜登在科罗拉多州出席美国空军学院毕业典礼时被现场一个沙袋绊倒，在众目睽睽下狠狠摔在讲台上。拜登随后自己站了起来，还用手指了指自己摔倒的地方，表示是有什么东西绊到了他。白宫发言人随后称，总统并无大碍。 (环球网)	07:01:07_x000D_ 【拜登出席毕业典礼被绊倒 白宫称总统无大碍】财联社6月2日电，美国有线电视新闻网（CNN）消息，当地时间6月1日，美国总统拜登在科罗拉多州出席美国空军学院毕业典礼时被现场一个沙袋绊倒，在众目睽睽下狠狠摔在讲台上。拜登随后自己站了起来，还用手指了指自己摔倒的地方，表示是有什么东西绊到了他。白宫发言人随后称，总统并无大碍。 (环球网)
20230612	【一光伏企业高管在慕尼黑下飞机后被带走】财联社6月12日电，今日傍晚，国内光伏圈突然传出消息，有中国光伏企业高管在参加2023年德国慕尼黑国际太阳能技术博览会（Intersolar Europe）时被现场带走。记者随后从一位在现场亲眼目睹这一过程的国内某光伏上市公司高层处，证实了该高管被带走的消息。但他表示，该高管被带走的地点不是展会现场，而是在慕尼黑机场。该消息也得到了多位参加此次展会的光伏业内人士确认。记者另从一位消息人士处了解到，这次被带走的不止一人，其中不少都是在航班降落慕尼黑机场后就被带走的。“就在我们眼前，他被几个穿制服的人带走了。”该高层惊魂未定地向记者讲述，被带走的是常州一家还未上市的光伏电池组件制造企业高管。 (上证报)	18:55:57_x000D_ 【一光伏企业高管在慕尼黑下飞机后被带走】财联社6月12日电，今日傍晚，国内光伏圈突然传出消息，有中国光伏企业高管在参加2023年德国慕尼黑国际太阳能技术博览会（Intersolar Europe）时被现场带走。记者随后从一位在现场亲眼目睹这一过程的国内某光伏上市公司高层处，证实了该高管被带走的消息。但他表示，该高管被带走的地点不是展会现场，而是在慕尼黑机场。该消息也得到了多位参加此次展会的光伏业内人士确认。记者另从一位消息人士处了解到，这次被带走的不止一人，其中不少都是在航班降落慕尼黑机场后就被带走的。“就在我们眼前，他被几个穿制服的人带走了。”该高层惊魂未定地向记者讲述，被带走的是常州一家还未上市的光伏电池组件制造企业高管。 (上证报)
20230614	【振芯科技：目前没有边缘计算芯片方面布局】财联社6月14日电，振芯科技在互动平台表示，公司目前没有边缘计算芯片方面布局。	14:05:18_x000D_ 【振芯科技：目前没有边缘计算芯片方面布局】财联社6月14日电，振芯科技在互动平台表示，公司目前没有边缘计算芯片方面布局。
20230703	【山东海化：拟投建盐化工及其产业链项目】财联社7月3日电，山东海化公告，拟在肥城经济开发区投资建设以岩盐资源开发为基础的盐化工及其产业链项目，并利用岩盐开采盐穴建设储能绿色低碳产业，其中岩盐开采和精制盐场建设总投资约9亿元；待岩盐开采形成盐腔具备储气条件后，转为储气项目建设阶段，初步规划建设10亿立方储气库项目，总投资约25亿元。	16:47:07_x000D_ 【山东海化：拟投建盐化工及其产业链项目】财联社7月3日电，山东海化公告，拟在肥城经济开发区投资建设以岩盐资源开发为基础的盐化工及其产业链项目，并利用岩盐开采盐穴建设储能绿色低碳产业，其中岩盐开采和精制盐场建设总投资约9亿元；待岩盐开采形成盐腔具备储气条件后，转为储气项目建设阶段，初步规划建设10亿立方储气库项目，总投资约25亿元。
20230710	【盛德鑫泰：上半年净利同比预增81.49%-88.47%】财联社7月10日电，盛德鑫泰公告，预计2023年半年度净利5200万元-5400万元，同比增长81.49%-88.47%。经营业绩增长主要是由于报告期内公司调整了产品结构，经初步测算，不锈钢产品的销量较去年同期增长了102.02%。	17:34:07_x000D_ 【盛德鑫泰：上半年净利同比预增81.49%-88.47%】财联社7月10日电，盛德鑫泰公告，预计2023年半年度净利5200万元-5400万元，同比增长81.49%-88.47%。经营业绩增长主要是由于报告期内公司调整了产品结构，经初步测算，不锈钢产品的销量较去年同期增长了102.02%。
20230720	【苏垦农发：上半年净利润同比下降19.44%】财联社7月20日电，苏垦农发发布业绩快报，2023上半年净利润为2.8亿元，同比下降19.44%。主要原因为报告期内小麦、食用油、水稻等农产品市场需求持续下行导致销量减少，营业收入下降；小麦、食用油等产品销售价格下跌、期初库存水稻生产成本上升导致毛利下降；同时新麦销量较上年同期减少，该部分营收和毛利未在上半年兑现。	16:58:52_x000D_ 【苏垦农发：上半年净利润同比下降19.44%】财联社7月20日电，苏垦农发发布业绩快报，2023上半年净利润为2.8亿元，同比下降19.44%。主要原因为报告期内小麦、食用油、水稻等农产品市场需求持续下行导致销量减少，营业收入下降；小麦、食用油等产品销售价格下跌、期初库存水稻生产成本上升导致毛利下降；同时新麦销量较上年同期减少，该部分营收和毛利未在上半年兑现。
20230721	10:57 _x000D_ [[+_+]]_x000D_ 专享 专享_x000D_ 【盘中宝】巨头为与苹果竞争，正加速推进该项目，产品端+政策端推动行业拐点已现，这家设备公司相关产品已取得客户认可 解锁直达>>	10:57 _x000D_ [[+_+]]_x000D_ 专享 专享_x000D_ 【盘中宝】巨头为与苹果竞争，正加速推进该项目，产品端+政策端推动行业拐点已现，这家设备公司相关产品已取得客户认可 解锁直达>>
20230617	【江西工职院“6·1”食品安全事件调查处理情况公布：判定异物为老鼠类啮齿动物的头部】财联社6月17日电，江西工业职业技术学院“6·1”食品安全事件调查结果公布，针对江西工业职业技术学院“6·1”食品安全事件，江西省教育厅、省公安厅、省国资委、省市场监督管理局组成的联合调查组，本着实事求是原则开展调查，现将有关情况通报如下。联合调查组经勘查现场，调取监控视频发现，6月1日，学生在食堂吃出疑似为“鼠头”的异物，被涉事食堂工作人员事发当日丢弃。通过查看食堂后厨视频，查阅采购清单，询问涉事食堂负责人、后厨相关当事人、当事学生和现场围观学生等，判定异物不是鸭脖。根据国内权威动物专家对提取的当事学生所拍现场照片和视频进行专业辨识，判定异物为老鼠类啮齿动物的头部。南昌高新区市场监督管理局昌东分局、江西工业职业技术学院未认真调查取证，发布“异物为鸭脖”结论是错误的。经认定，江西工业职业技术学院对此次事件…	12:31:37_x000D_ 【江西工职院“6·1”食品安全事件调查处理情况公布：判定异物为老鼠类啮齿动物的头部】财联社6月17日电，江西工业职业技术学院“6·1”食品安全事件调查结果公布，针对江西工业职业技术学院“6·1”食品安全事件，江西省教育厅、省公安厅、省国资委、省市场监督管理局组成的联合调查组，本着实事求是原则开展调查，现将有关情况通报如下。_x000D_ _x000D_ _x000D_ _x000D_ 联合调查组经勘查现场，调取监控视频发现，6月1日，学生在食堂吃出疑似为“鼠头”的异物，被涉事食堂工作人员事发当日丢弃。通过查看食堂后厨视频，查阅采购清单，询问涉事食堂负责人、后厨相关当事人、当事学生和现场围观学生等，判定异物不是鸭脖。根据国内权威动物专家对提取的当事学生所拍现场照片和视频进行专业辨识，判定异物为老鼠类啮齿动物的头部。南昌高新区市场监督管理局昌东分局、江西工业职…
20230521	【华海清科：12英寸超精密晶圆减薄机量产机台出货】财联社5月21日电，华海清科公告，近日，公司新一代12英寸超精密晶圆减薄机Versatile-GP300量产机台出机发往集成电路龙头企业。12英寸超精密晶圆减薄机是业内首次实现12英寸晶圆超精密磨削和CMP全局平坦化的有机整合集成设备，Versatile-GP300量产机台可稳定实现12英寸晶圆片内磨削总厚度变化＜1um和减薄工艺全过程的稳定可控。	16:37:47_x000D_ 【华海清科：12英寸超精密晶圆减薄机量产机台出货】财联社5月21日电，华海清科公告，近日，公司新一代12英寸超精密晶圆减薄机Versatile-GP300量产机台出机发往集成电路龙头企业。12英寸超精密晶圆减薄机是业内首次实现12英寸晶圆超精密磨削和CMP全局平坦化的有机整合集成设备，Versatile-GP300量产机台可稳定实现12英寸晶圆片内磨削总厚度变化＜1um和减薄工艺全过程的稳定可控。
20230525	【比亚迪发布声明回应长城汽车举报：坚决反对任何形式的不正当竞争行为 相关产品及检测符合国家标准】财联社5月25日电，比亚迪发布声明：坚决反对任何形式的不正当竞争行为，并保留法务诉讼的权力。经了解，长城所说的情况，测试车辆由长城购买、保管并安排送检，中汽中心(天津) 按长城的要求进行了相关项目的检测。测试车辆严格来说，不符合国标要求的送检状态，即应由第三方抽样、保管及送检，并要求完成3000公里磨合后测试，而长城送检的车辆在检测时，里程仅为450-670公里。鉴于以上，我们认为其检测报告无效，长城不能以此作为依据。我们的产品及相关检测符合国家标准，在国家权威机构通过认证。欢迎有关部门随时过来调查、取证和检测。	12:28:32_x000D_ 【比亚迪发布声明回应长城汽车举报：坚决反对任何形式的不正当竞争行为 相关产品及检测符合国家标准】财联社5月25日电，比亚迪发布声明：坚决反对任何形式的不正当竞争行为，并保留法务诉讼的权力。经了解，长城所说的情况，测试车辆由长城购买、保管并安排送检，中汽中心(天津) 按长城的要求进行了相关项目的检测。测试车辆严格来说，不符合国标要求的送检状态，即应由第三方抽样、保管及送检，并要求完成3000公里磨合后测试，而长城送检的车辆在检测时，里程仅为450-670公里。鉴于以上，我们认为其检测报告无效，长城不能以此作为依据。我们的产品及相关检测符合国家标准，在国家权威机构通过认证。欢迎有关部门随时过来调查、取证和检测。
20230531	【冠石科技：拟定增募资不超过8亿元】财联社5月31日电，冠石科技公告，拟定增募资不超过8亿元，用于光掩膜版制造项目。	18:24:43_x000D_ 【冠石科技：拟定增募资不超过8亿元】财联社5月31日电，冠石科技公告，拟定增募资不超过8亿元，用于光掩膜版制造项目。
20230629	【盛视科技：中标约1.06亿元设备采购项目】财联社6月29日电，盛视科技公告，近期公司中标瑞丽(含畹町)口岸智慧改造升级项目(一期)——设备采购项目，中标价约为1.06亿元。	18:55:41_x000D_ 【盛视科技：中标约1.06亿元设备采购项目】财联社6月29日电，盛视科技公告，近期公司中标瑞丽(含畹町)口岸智慧改造升级项目(一期)——设备采购项目，中标价约为1.06亿元。
20230713	【中信证券：预计下半年美联储重启加息概率较高】财联社7月13日电，中信证券研报指出，美国6月通胀数据全面低于预期，完成上半年去通胀进程的顺利收官；不过我们预计下半年基数效应的消退将使CPI同比读数显示粘性， 7月CPI同比可能反弹，随后持续在3%水平附近震荡。预计美联储7月重启加息概率仍然较大，9月及以后是否加息仍需观察后续就业和通胀环比数据走势，预计联储年内仍将维持鹰派立场、全年不降息。预计十年期美债利率与美元指数短期维持偏弱震荡，但难有显著下行趋势，美股反弹仍将延续，待衰退预期升温后或将转向下行。	08:36:41_x000D_ 【中信证券：预计下半年美联储重启加息概率较高】财联社7月13日电，中信证券研报指出，美国6月通胀数据全面低于预期，完成上半年去通胀进程的顺利收官；不过我们预计下半年基数效应的消退将使CPI同比读数显示粘性， 7月CPI同比可能反弹，随后持续在3%水平附近震荡。预计美联储7月重启加息概率仍然较大，9月及以后是否加息仍需观察后续就业和通胀环比数据走势，预计联储年内仍将维持鹰派立场、全年不降息。预计十年期美债利率与美元指数短期维持偏弱震荡，但难有显著下行趋势，美股反弹仍将延续，待衰退预期升温后或将转向下行。
20230720	【江淮汽车与宏景智驾签署全面深化战略合作协议】财联社7月20日电，据江汽集团消息，7月19日，江淮汽车与杭州宏景智驾科技有限公司（以下简称“宏景智驾”）在合肥正式签署全面深化战略合作协议。根据协议，双方将在智能驾驶技术量产及前瞻技术研发领域展开合作，实现优势互补，共同发展，打造可持续发展的战略合作伙伴关系。	21:11:58_x000D_ 【江淮汽车与宏景智驾签署全面深化战略合作协议】财联社7月20日电，据江汽集团消息，7月19日，江淮汽车与杭州宏景智驾科技有限公司（以下简称“宏景智驾”）在合肥正式签署全面深化战略合作协议。根据协议，双方将在智能驾驶技术量产及前瞻技术研发领域展开合作，实现优势互补，共同发展，打造可持续发展的战略合作伙伴关系。
20230222	【新乡化纤：拟出资5000万元设立全资子公司菌草公司】财联社2月22日电，新乡化纤公告，拟出资5000万元设立全资子公司新乡菌草新材料技术有限公司（简称“菌草公司”）。菌草技术是“以草代木”发展起来的中国特有技术，能够实现光、热、水三大农业资源综合高效利用。	17:44_x000D_ 【新乡化纤：拟出资5000万元设立全资子公司菌草公司】财联社2月22日电，新乡化纤公告，拟出资5000万元设立全资子公司新乡菌草新材料技术有限公司（简称“菌草公司”）。菌草技术是“以草代木”发展起来的中国特有技术，能够实现光、热、水三大农业资源综合高效利用。
20230304	【全面注册制下首家新申报企业诞生 主板IPO平移达234家】财联社3月4日电，记者注意到，全面注册制新规下，3月4日，首家IPO新申报企业诞生，为沪市的药都银行，保荐机构为华泰联合证券。随后有新申报企业陆续释出。根据有关衔接安排，自2月17日全面注册制推行的主要规则发布之日起10个工作日内，沪深交易所仅接收证监会沪市主板首次公开发行股票、再融资、并购重组在审企业提交的相关申请，在10个工作日后，将开始接收主板新申报企业提交的相关申请。这意味着，如果主板在审企业未在规定期限内申报给交易所的，将被视为新申报企业。沪深交易所官网显示，2月17日至3月3日晚间，沪深交易所合计已受理了390家在审企业的相关平移申报，除了申请再融资的企业152家、并购重组的企业4家，平移申报的IPO企业为234家（深市105单，沪市含已问询129单），若按照新规推行前IPO主板在审项目存量288家计算，剩余约两成企…	15:17_x000D_ 【全面注册制下首家新申报企业诞生 主板IPO平移达234家】财联社3月4日电，记者注意到，全面注册制新规下，3月4日，首家IPO新申报企业诞生，为沪市的药都银行，保荐机构为华泰联合证券。随后有新申报企业陆续释出。根据有关衔接安排，自2月17日全面注册制推行的主要规则发布之日起10个工作日内，沪深交易所仅接收证监会沪市主板首次公开发行股票、再融资、并购重组在审企业提交的相关申请，在10个工作日后，将开始接收主板新申报企业提交的相关申请。这意味着，如果主板在审企业未在规定期限内申报给交易所的，将被视为新申报企业。沪深交易所官网显示，2月17日至3月3日晚间，沪深交易所合计已受理了390家在审企业的相关平移申报，除了申请再融资的企业152家、并购重组的企业4家，平移申报的IPO企业为234家（深市105单，沪市含已问询129单），若按照新规推行前IPO主板在审项目存量…
20230307	08:12 _x000D_ [[+_+]]_x000D_ 专享 专享_x000D_ 【点金互动易】北斗+军工+大飞机，实现无线通信全频段覆盖，及北斗导航装备全产业链布局，这家公司未来将持续受益客户换装，子公司还是中航西飞、商飞、成发供应商	08:12 _x000D_ [[+_+]]_x000D_ 专享 专享_x000D_ 【点金互动易】北斗+军工+大飞机，实现无线通信全频段覆盖，及北斗导航装备全产业链布局，这家公司未来将持续受益客户换装，子公司还是中航西飞、商飞、成发供应商 解锁直达>>
20230120	【万里石：羊易发电今年有望生产百十吨碳酸锂产品 属于世界首个地热资源提锂产业化项目】财联社1月20日电，万里石接受机构调研时表示，控股子公司万里资源公司与杭州锦江集团、当雄县羊易电站签署《发起设立合资公司开发西藏羊易地热水综合利用项目合作协议》，拟成立合资公司进行地热水资源综合利用。项目技术将使用新疆泰利信TMS吸附提锂技术，一期计划生产碳酸锂产能不低于500吨/年，投资约3000万元，建设周期6个月，后续二期计划建设产能不低于1500吨/年。羊易地热水锂离子浓度极低，仅17mg/L，属于世界首个地热资源提锂产业化项目。泰利信公司通过1年多的实验，得出丰富的实验数据支撑，项目可落地性较强，一期完成500吨电池级碳酸锂开发，后续随着地热水量的放量，具备做到2000吨的基本条件。青海项目地面铺设基本完成，长周期设备已经完成采购，立项及环评正在推进中，争取6月份能够投料试车。羊易发电今年有望生…	15:10_x000D_ 【万里石：羊易发电今年有望生产百十吨碳酸锂产品 属于世界首个地热资源提锂产业化项目】财联社1月20日电，万里石接受机构调研时表示，控股子公司万里资源公司与杭州锦江集团、当雄县羊易电站签署《发起设立合资公司开发西藏羊易地热水综合利用项目合作协议》，拟成立合资公司进行地热水资源综合利用。项目技术将使用新疆泰利信TMS吸附提锂技术，一期计划生产碳酸锂产能不低于500吨/年，投资约3000万元，建设周期6个月，后续二期计划建设产能不低于1500吨/年。羊易地热水锂离子浓度极低，仅17mg/L，属于世界首个地热资源提锂产业化项目。泰利信公司通过1年多的实验，得出丰富的实验数据支撑，项目可落地性较强，一期完成500吨电池级碳酸锂开发，后续随着地热水量的放量，具备做到2000吨的基本条件。青海项目地面铺设基本完成，长周期设备已经完成采购，立项及环评正在推进中，争取6月份能够投…
20230120	【三大指数全线飘红迎虎年收官 财联社祝您兔年“钱兔”似锦、财富“兔”飞猛进！】财联社1月20日电，A股虎年行情今日收官，三大指数震荡上行全线飘红，两市超3600只个股上涨，北向资金继续大幅净买入。从指数全年表现看，三大指数均收跌，但临近年关迎来虎尾行情，各大指数在权重股带领下展开强劲反弹。最终上证指数虎年全年下跌2.88%，深证成指下跌10.11%，创业板指下跌11.1%。从个股表现来看，虎年超过2000只个股上涨，其中涨幅100%以上个股89只，涨幅200%以上个股13只，涨幅300%以上个股6只。涨幅前三名(剔除次新股)分别为绿康生化（002868）、通润装备（002150）、宝明科技（002992），涨幅分别达435.52%、345.29%、312.81%。与此同时，跌幅50%以上个股54只，跌幅70%以上个股4只，跌幅前三名个股分别为*ST紫晶、*ST泽达、*ST吉艾，跌幅分别达…	15:04_x000D_ 【三大指数全线飘红迎虎年收官 财联社祝您兔年“钱兔”似锦、财富“兔”飞猛进！】财联社1月20日电，A股虎年行情今日收官，三大指数震荡上行全线飘红，两市超3600只个股上涨，北向资金继续大幅净买入。从指数全年表现看，三大指数均收跌，但临近年关迎来虎尾行情，各大指数在权重股带领下展开强劲反弹。最终上证指数虎年全年下跌2.88%，深证成指下跌10.11%，创业板指下跌11.1%。从个股表现来看，虎年超过2000只个股上涨，其中涨幅100%以上个股89只，涨幅200%以上个股13只，涨幅300%以上个股6只。涨幅前三名(剔除次新股)分别为绿康生化（002868）、通润装备（002150）、宝明科技（002992），涨幅分别达435.52%、345.29%、312.81%。与此同时，跌幅50%以上个股54只，跌幅70%以上个股4只，跌幅前三名个股分别为*ST紫晶、*ST泽…
20230213	【翰宇药业：控股股东及其一致行动人拟合计减持不超2%股份】财联社2月13日电，翰宇药业公告，公司控股股东、实控人曾少贵及其一致行动人曾少强、曾少彬合计持有公司股份2.9亿股（占公司总股本32.79%），计划15个交易日后的6个月内采用集中竞价交易方式，减持公司股份总量不超过1766.48万股（占公司总股本的2%）。	18:56_x000D_ 【翰宇药业：控股股东及其一致行动人拟合计减持不超2%股份】财联社2月13日电，翰宇药业公告，公司控股股东、实控人曾少贵及其一致行动人曾少强、曾少彬合计持有公司股份2.9亿股（占公司总股本32.79%），计划15个交易日后的6个月内采用集中竞价交易方式，减持公司股份总量不超过1766.48万股（占公司总股本的2%）。
20230630	【主力资金监控：计算机板块净流出超27亿元】财联社6月30日电，财联社星矿数据显示，今日早盘主力资金净流入电子、电新行业、基础化工等板块，净流出计算机、机械设备、文化传媒等板块，其中计算机板块净流出超27亿元。个股方面，N芯动大涨，主力资金净买入6.27亿元，拓邦股份、华西股份、紫光国微获主力资金净流入居前；科大讯飞遭净卖出超4亿元，拓尔思、昆仑万维、浪潮信息主力资金净流出额居前。	10:54:32_x000D_ 【主力资金监控：计算机板块净流出超27亿元】财联社6月30日电，财联社星矿数据显示，今日早盘主力资金净流入电子、电新行业、基础化工等板块，净流出计算机、机械设备、文化传媒等板块，其中计算机板块净流出超27亿元。个股方面，N芯动大涨，主力资金净买入6.27亿元，拓邦股份、华西股份、紫光国微获主力资金净流入居前；科大讯飞遭净卖出超4亿元，拓尔思、昆仑万维、浪潮信息主力资金净流出额居前。
20230713	【众泰汽车：预计上半年亏损2亿-3亿元】财联社7月13日电，众泰汽车公告，预计上半年亏损2亿-3亿元；上半年公司整车业务仍在恢复中，销量规模较小，因此整体业绩仍处于亏损状态。	17:31:43_x000D_ 【众泰汽车：预计上半年亏损2亿-3亿元】财联社7月13日电，众泰汽车公告，预计上半年亏损2亿-3亿元；上半年公司整车业务仍在恢复中，销量规模较小，因此整体业绩仍处于亏损状态。
20230714	【万华化学：子公司匈牙利宝思德化学公司装置停产检修】财联社7月14日电，万华化学公告，子公司匈牙利宝思德化学公司TDI装置（25万吨/年）将于2023年7月15日开始陆续停产检修，预计检修30天左右；MDI装置（35万吨/年）将于2023年7月18日开始陆续停产检修并进行技改扩能，技改后产能将提升至40万吨/年，预计检修80天左右。	16:24:52_x000D_ 【万华化学：子公司匈牙利宝思德化学公司装置停产检修】财联社7月14日电，万华化学公告，子公司匈牙利宝思德化学公司TDI装置（25万吨/年）将于2023年7月15日开始陆续停产检修，预计检修30天左右；MDI装置（35万吨/年）将于2023年7月18日开始陆续停产检修并进行技改扩能，技改后产能将提升至40万吨/年，预计检修80天左右。
20230720	【恒烁股份：公司在TinyML已经有所布局】财联社7月20日电，恒烁股份在接受机构调研时表示，公司目前TinyML的布局主要分为两块，一是基于TinyML的AI功能模组产品；二是TinyML超轻量化AI算法和部署技术服务。	16:09:44_x000D_ 【恒烁股份：公司在TinyML已经有所布局】财联社7月20日电，恒烁股份在接受机构调研时表示，公司目前TinyML的布局主要分为两块，一是基于TinyML的AI功能模组产品；二是TinyML超轻量化AI算法和部署技术服务。
20230530	【中信证券：A股下半年将迎来底部温和复苏】财联社5月30日电，中信证券研报指出，步入“转折之年”的A股，受投资者预期和心态变化的影响，市场波动较大。本轮经济恢复是渐进和渐次的过程，政策全面呵护经济持续稳定增长，A股盈利在压制因素缓解后，下半年将迎来底部温和复苏。与此同时，海外金融风险、欧美衰退、大选周期三因素叠加，持续扰动市场。随着基本面预期逐步改善，投资者心态将重归平稳，其行为模式也将从短期主题博弈重回长期业绩主导。在投资模式转换期，A股市场波动依然较大，乘风破浪时，建议以业绩为纲，兼顾政策主线。具体而言，在二三季度，重点配置“安全”主线中有政策催化或业绩优势的品种，进入四季度则开始切换至复苏交易。	08:34:48_x000D_ 【中信证券：A股下半年将迎来底部温和复苏】财联社5月30日电，中信证券研报指出，步入“转折之年”的A股，受投资者预期和心态变化的影响，市场波动较大。本轮经济恢复是渐进和渐次的过程，政策全面呵护经济持续稳定增长，A股盈利在压制因素缓解后，下半年将迎来底部温和复苏。与此同时，海外金融风险、欧美衰退、大选周期三因素叠加，持续扰动市场。随着基本面预期逐步改善，投资者心态将重归平稳，其行为模式也将从短期主题博弈重回长期业绩主导。在投资模式转换期，A股市场波动依然较大，乘风破浪时，建议以业绩为纲，兼顾政策主线。具体而言，在二三季度，重点配置“安全”主线中有政策催化或业绩优势的品种，进入四季度则开始切换至复苏交易。
20230615	【常青股份：公司一体化压铸项目正在积极推进 预计2024年达到投产条件】财联社6月15日电，常青股份在互动平台表示，公司分红派息自公司2022年年度股东大会审议通过之日起2个月内实施，具体时间请关注公司在上交所官网的公告。公司一体化压铸项目正在积极推进，预计2024年达到投产条件。	09:44:51_x000D_ 【常青股份：公司一体化压铸项目正在积极推进 预计2024年达到投产条件】财联社6月15日电，常青股份在互动平台表示，公司分红派息自公司2022年年度股东大会审议通过之日起2个月内实施，具体时间请关注公司在上交所官网的公告。公司一体化压铸项目正在积极推进，预计2024年达到投产条件。
20230414	【冰轮环境：一季度净利预增85%-121%】财联社4月14日电，冰轮环境公告，预计2023年一季度归母净利9200万元-1.10亿元，同比增长85%-121%。报告期内公司产品市场景气度升高，公司综合竞争力增强，经营业绩提高。公司非经常性损益金额区间约为800万元-1100万元，上年同期为1743万元。	15:51:21_x000D_ 【冰轮环境：一季度净利预增85%-121%】财联社4月14日电，冰轮环境公告，预计2023年一季度归母净利9200万元-1.10亿元，同比增长85%-121%。报告期内公司产品市场景气度升高，公司综合竞争力增强，经营业绩提高。公司非经常性损益金额区间约为800万元-1100万元，上年同期为1743万元。
20230418	【布林肯称中国必须表现出继续与美国接触的意愿 外交部回应】财联社4月18日电，外交部发言人汪文斌18日主持例行记者会。有记者提问，美国务卿布林肯在G7外长会上表示，中国必须表现出继续与美国接触的意愿，他还称，期待美中两国关系取得进展。发言人对此有何评论？汪文斌表示，中国始终按照相互尊重、和平共处、合作共赢三原则看待和发展中美关系。当前中美关系紧张的根源在于美方基于错误的对华认知，制定和执行错误的对华政策，美方应停止干涉中国内政，停止损害中国利益，停止一边声称要为中美关系加装“护栏”，一边破坏两国关系的政治基础。	15:48:00_x000D_ 【布林肯称中国必须表现出继续与美国接触的意愿 外交部回应】财联社4月18日电，外交部发言人汪文斌18日主持例行记者会。有记者提问，美国务卿布林肯在G7外长会上表示，中国必须表现出继续与美国接触的意愿，他还称，期待美中两国关系取得进展。发言人对此有何评论？汪文斌表示，中国始终按照相互尊重、和平共处、合作共赢三原则看待和发展中美关系。当前中美关系紧张的根源在于美方基于错误的对华认知，制定和执行错误的对华政策，美方应停止干涉中国内政，停止损害中国利益，停止一边声称要为中美关系加装“护栏”，一边破坏两国关系的政治基础。
20230427	【通富微电：国家集成电路基金拟减持不超过2%股份】财联社4月27日电，通富微电公告，国家集成电路产业投资基金股份有限公司拟减持不超过2%公司股份。	18:46:38_x000D_ 【通富微电：国家集成电路基金拟减持不超过2%股份】财联社4月27日电，通富微电公告，国家集成电路产业投资基金股份有限公司拟减持不超过2%公司股份。
20230609	【主力资金监控：东方财富、中电港遭净卖出超3亿元】财联社6月9日电，财联社星矿数据显示，今日早盘主力资金净流入汽车、有色金属、保险等板块，净流出文化传媒、房地产、非银金融等板块，其中，文化传媒板块净流出超7亿元。个股方面，N阿特斯大涨，主力资金净买入6.11亿元，人民网、华胜天成、钧达股份获主力资金净流入居前；东方财富、中电港遭净卖出超3亿元，三六零、鸿博股份、奥拓电子主力资金净流出额居前。	11:03:42_x000D_ 【主力资金监控：东方财富、中电港遭净卖出超3亿元】财联社6月9日电，财联社星矿数据显示，今日早盘主力资金净流入汽车、有色金属、保险等板块，净流出文化传媒、房地产、非银金融等板块，其中，文化传媒板块净流出超7亿元。个股方面，N阿特斯大涨，主力资金净买入6.11亿元，人民网、华胜天成、钧达股份获主力资金净流入居前；东方财富、中电港遭净卖出超3亿元，三六零、鸿博股份、奥拓电子主力资金净流出额居前。
20230616	【深交所：本周对近期涨幅异常的“鸿博股份”“铭普光磁”进行重点监控】财联社6月16日电，深交所公告，6月12日至6月16日，本所共对99起证券异常交易行为采取了自律监管措施，涉及盘中拉抬打压、虚假申报等异常交易情形；对近期涨幅异常的“鸿博股份”“铭普光磁”进行重点监控；共对21起上市公司重大事项进行核查，并上报证监会5起涉嫌违法违规案件线索。	17:17:48_x000D_ 【深交所：本周对近期涨幅异常的“鸿博股份”“铭普光磁”进行重点监控】财联社6月16日电，深交所公告，6月12日至6月16日，本所共对99起证券异常交易行为采取了自律监管措施，涉及盘中拉抬打压、虚假申报等异常交易情形；对近期涨幅异常的“鸿博股份”“铭普光磁”进行重点监控；共对21起上市公司重大事项进行核查，并上报证监会5起涉嫌违法违规案件线索。
20230620	09:57 _x000D_ [[+_+]]_x000D_ 专享 专享_x000D_ 【盘中宝•数据】版号重启+AIGC赋能，游戏有望迎来确定性修复，这家公司端游全系产品流水累计收入超200亿元，相关上市公司游戏流水、储备数据一览（附表） 解	09:57 _x000D_ [[+_+]]_x000D_ 专享 专享_x000D_ 【盘中宝•数据】版号重启+AIGC赋能，游戏有望迎来确定性修复，这家公司端游全系产品流水累计收入超200亿元，相关上市公司游戏流水、储备数据一览（附表） 解锁直达>>
20230607	【恒信东方：目前未与英伟达开展合作 公司VR游戏产品正在Quest平台第三方应用平台Sidequest公测】财联社6月7日电，恒信东方在互动平台表示，公司VR游戏产品《Drakheir》（暂定名）为Meta Quest 2平台“裸手”手势互动VR游戏，目前正在Quest平台第三方应用平台Sidequest公测。目前，苹果Vision Pro头显刚刚发布，其开发者套件（SDK）尚无可靠信息放出，暂时无法判断移植难度。但公开信息表明，苹果Vision Pro不附带手柄或其他控制器，意味着其人机交互（HCI）操作高度依赖裸手交互及眼动追踪等非传统交互。不同于当前手机、PC、游戏主机等平台的键鼠、手柄控制器等非自然交互方式，裸手操作它可以带来更强的沉浸感和驾驭感，但在用户体验设计层面需要大量探索，目前头显搭载的感知硬件及算法还未成熟，尚未进入快速变现期。此外，公司目前没有与英伟达开展合作。	10:56:07_x000D_ 【恒信东方：目前未与英伟达开展合作 公司VR游戏产品正在Quest平台第三方应用平台Sidequest公测】财联社6月7日电，恒信东方在互动平台表示，公司VR游戏产品《Drakheir》（暂定名）为Meta Quest 2平台“裸手”手势互动VR游戏，目前正在Quest平台第三方应用平台Sidequest公测。目前，苹果Vision Pro头显刚刚发布，其开发者套件（SDK）尚无可靠信息放出，暂时无法判断移植难度。但公开信息表明，苹果Vision Pro不附带手柄或其他控制器，意味着其人机交互（HCI）操作高度依赖裸手交互及眼动追踪等非传统交互。不同于当前手机、PC、游戏主机等平台的键鼠、手柄控制器等非自然交互方式，裸手操作它可以带来更强的沉浸感和驾驭感，但在用户体验设计层面需要大量探索，目前头显搭载的感知硬件及算法还未成熟，尚未进入快速变现期。此外，公司…
20230616	12:53 _x000D_ [[+_+]]_x000D_ 专享 专享_x000D_ 【机构调研】这家中文NLP巨头“专业大模型”将在本月推出，拥有数据总量超1500亿条 解锁直达>>	12:53 _x000D_ [[+_+]]_x000D_ 专享 专享_x000D_ 【机构调研】这家中文NLP巨头“专业大模型”将在本月推出，拥有数据总量超1500亿条 解锁直达>>
20230802	【毕得医药：解聘时长春副总经理职务 三位董事投票反对】财联社8月2日电，毕得医药公告，公司8月1日召开董事会会议，审议了《关于解聘时长春副总经理职务的议案》等相关议案，时长春从即日起不再担任公司副总经理职务。对于该议案，现场实际表决结果为5票赞成、3票反对，其中董事戴龙、王超、芦晓旭、毛永浩、独立董事张萌投票赞成，董事戴岚、独立董事魏炜、独立董事田伟生投票反对。	22:52:35_x000D_ 【毕得医药：解聘时长春副总经理职务 三位董事投票反对】财联社8月2日电，毕得医药公告，公司8月1日召开董事会会议，审议了《关于解聘时长春副总经理职务的议案》等相关议案，时长春从即日起不再担任公司副总经理职务。对于该议案，现场实际表决结果为5票赞成、3票反对，其中董事戴龙、王超、芦晓旭、毛永浩、独立董事张萌投票赞成，董事戴岚、独立董事魏炜、独立董事田伟生投票反对。
20230811	【光大信托回应“产品停兑”传闻：公司管理的信托产品运营正常】财联社8月11日电，光大信托在官网就“部分信托产品停兑”传闻回应称：“就近日网络流传的关于光大信托产品兑付的不实言论，我司作出严正申明：公司管理的信托产品运营正常，均按照信托合同约定进行管理和信托利益分配，对于不实言论和传言公司将依法保留追究法律责任的权利！”今日早些时候，有市场传闻称，“中植爆雷引发中融信托今天也停兑了”，并称“有投资者买的五矿信托、光大信托等信托产品也通知停兑”。	19:25:51_x000D_ 【光大信托回应“产品停兑”传闻：公司管理的信托产品运营正常】财联社8月11日电，光大信托在官网就“部分信托产品停兑”传闻回应称：“就近日网络流传的关于光大信托产品兑付的不实言论，我司作出严正申明：公司管理的信托产品运营正常，均按照信托合同约定进行管理和信托利益分配，对于不实言论和传言公司将依法保留追究法律责任的权利！”今日早些时候，有市场传闻称，“中植爆雷引发中融信托今天也停兑了”，并称“有投资者买的五矿信托、光大信托等信托产品也通知停兑”。
20230814	【万控智造：上半年净利润同比增长24.73%】财联社8月14日电，万控智造公告，上半年净利润8484万元，同比增长24.73%。	19:36:18_x000D_ 【万控智造：上半年净利润同比增长24.73%】财联社8月14日电，万控智造公告，上半年净利润8484万元，同比增长24.73%。
20230119	【长川科技：2022年度净利预增106%-138%】财联社1月19日电，长川科技披露2022年度业绩预告，公司预计2022年度实现归属于上市公司股东的净利润4.50亿元-5.20亿元，同比增长106.20%-138.27%。小财注：Q3净利8037万元，据此计算，Q4净利预计1.25亿元-1.95亿元，环比增长56%至143%。	17:52_x000D_ 【长川科技：2022年度净利预增106%-138%】财联社1月19日电，长川科技披露2022年度业绩预告，公司预计2022年度实现归属于上市公司股东的净利润4.50亿元-5.20亿元，同比增长106.20%-138.27%。小财注：Q3净利8037万元，据此计算，Q4净利预计1.25亿元-1.95亿元，环比增长56%至143%。
20230227	【中金：硅料企稳推动辅材回暖 盈利能力持续改善】财联社2月27日电，中金公司研报指出，近日硅料报价止涨，带动光伏行业景气度上行，我们认为地热季度硅料价格有望持续回落，下游需求向好情况下我们预计辅材板块回暖，2023年产品出货有望+30%，量价齐升及结构优化助力产品毛利率提升约5个点。	07:55_x000D_ 【中金：硅料企稳推动辅材回暖 盈利能力持续改善】财联社2月27日电，中金公司研报指出，近日硅料报价止涨，带动光伏行业景气度上行，我们认为地热季度硅料价格有望持续回落，下游需求向好情况下我们预计辅材板块回暖，2023年产品出货有望+30%，量价齐升及结构优化助力产品毛利率提升约5个点。
20230113	【万里扬：2022年净利同比预增140%-154%】财联社1月13日电，万里扬发布业绩预告，预计2022年归母净利3亿元-4亿元，同比增长140.14%-153.51%。2022年，公司不断加大新技术、新产品的研发投入，大力推动公司经营业务向新能源汽车零部件业务的战略转型和发展。同时，全面推动生产制造的智能化、数字化，有效提升了产品品质和生产效率。	18:38_x000D_ 【万里扬：2022年净利同比预增140%-154%】财联社1月13日电，万里扬发布业绩预告，预计2022年归母净利3亿元-4亿元，同比增长140.14%-153.51%。2022年，公司不断加大新技术、新产品的研发投入，大力推动公司经营业务向新能源汽车零部件业务的战略转型和发展。同时，全面推动生产制造的智能化、数字化，有效提升了产品品质和生产效率。
20230714	【首旅酒店：预计上半年净利润2.6亿元-3亿元】财联社7月14日电，首旅酒店公告，预计上半年净利润2.6亿元-3亿元，上年同期净亏损3.8亿元。报告期内，公司全部酒店RevPAR为147元，比上年同期上升66%；不含轻管理酒店的全部酒店RevPAR为163元，比上年同期上升72%。	15:43:04_x000D_ 【首旅酒店：预计上半年净利润2.6亿元-3亿元】财联社7月14日电，首旅酒店公告，预计上半年净利润2.6亿元-3亿元，上年同期净亏损3.8亿元。报告期内，公司全部酒店RevPAR为147元，比上年同期上升66%；不含轻管理酒店的全部酒店RevPAR为163元，比上年同期上升72%。
20230717	【高盛下调未来12个月美国经济衰退可能性至20%】财联社7月17日电，高盛经济学家Jan Hatzius已将美国经济衰退的可能性从此前的25%下调至20%。他表示：“最近的数据和持续的基本面都表明，通胀将从现在开始迅速下降，而且基本上不会对经济造成影响。”今年3月，高盛将美国经济衰退的可能性提高到35%，并称美联储不会在3月会议上加息，但最终美联储提高了利率，银行危机迅速消退。	23:50:13_x000D_ 【高盛下调未来12个月美国经济衰退可能性至20%】财联社7月17日电，高盛经济学家Jan Hatzius已将美国经济衰退的可能性从此前的25%下调至20%。他表示：“最近的数据和持续的基本面都表明，通胀将从现在开始迅速下降，而且基本上不会对经济造成影响。”今年3月，高盛将美国经济衰退的可能性提高到35%，并称美联储不会在3月会议上加息，但最终美联储提高了利率，银行危机迅速消退。
20230724	【片仔癀：林纬奇辞去董事长等职务】财联社7月24日电，片仔癀公告，林纬奇因工作调整，向董事会辞去公司董事长、董事及董事会下属专门委员会委员等职务。经董事会半数以上董事共同推举，在董事会选举产生新任董事长前，由董事、总经理黄进明代为履行董事长职责，主持董事会日常工作，直至选举产生新任董事长为止。	20:25:44_x000D_ 【片仔癀：林纬奇辞去董事长等职务】财联社7月24日电，片仔癀公告，林纬奇因工作调整，向董事会辞去公司董事长、董事及董事会下属专门委员会委员等职务。经董事会半数以上董事共同推举，在董事会选举产生新任董事长前，由董事、总经理黄进明代为履行董事长职责，主持董事会日常工作，直至选举产生新任董事长为止。
20230828	【凌云股份：上半年净利约3.23亿元 同比增长125.95%】财联社8月28日电，凌云股份发布半年报，上半年实现营业收入约86.55亿元，同比增长9.75%；净利润约3.23亿元，同比增长125.95%；基本每股收益0.35元。	20:09:37_x000D_ 【凌云股份：上半年净利约3.23亿元 同比增长125.95%】财联社8月28日电，凌云股份发布半年报，上半年实现营业收入约86.55亿元，同比增长9.75%；净利润约3.23亿元，同比增长125.95%；基本每股收益0.35元。
20230903	【证监会首席律师焦津洪：以健全的法治和强有力的监管执法提振投资者信心】财联社9月3日电，中国证监会首席律师焦津洪9月3日在参加2023中国国际金融年度论坛时表示，加强资本市场法治建设，严格监管执法是建设中国特色现代资本市场的重要内容。下一步中国证监会将努力以健全的法治和强有力的监管执法提振投资者信心。完善资本市场监管执法体制机制。全面推进监管转型，强化各条线的监管协同，构建高效协同的监管架构，完善符合资本市场发展需要的中国特色证券执法体制机制，强化零容忍执法的震慑，深化与公安司法机关的协作配合，增强监管执法的合力。坚持把投资者保护理念贯穿资本市场监管全链条，推动中国特色集体诉讼常态化开展，统筹运用行政和解先行赔付、责令回购等制度措施，丰富持股行权支持诉讼示范判决等实践，切实保护投资者的合法权益。	10:33:48_x000D_ 【证监会首席律师焦津洪：以健全的法治和强有力的监管执法提振投资者信心】财联社9月3日电，中国证监会首席律师焦津洪9月3日在参加2023中国国际金融年度论坛时表示，加强资本市场法治建设，严格监管执法是建设中国特色现代资本市场的重要内容。下一步中国证监会将努力以健全的法治和强有力的监管执法提振投资者信心。完善资本市场监管执法体制机制。全面推进监管转型，强化各条线的监管协同，构建高效协同的监管架构，完善符合资本市场发展需要的中国特色证券执法体制机制，强化零容忍执法的震慑，深化与公安司法机关的协作配合，增强监管执法的合力。坚持把投资者保护理念贯穿资本市场监管全链条，推动中国特色集体诉讼常态化开展，统筹运用行政和解先行赔付、责令回购等制度措施，丰富持股行权支持诉讼示范判决等实践，切实保护投资者的合法权益。
20230320	【吉电股份：签订大安风光制绿氢合成氨一体化示范项目PEM制氢设备供货合同】财联社3月20日电，吉电股份公告，全资子公司大安吉电绿氢能源有限公司拟与长春绿动氢能科技有限公司签订大安风光制绿氢合成氨一体化示范项目PEM制氢设备供货合同，合同价格为2.9亿元。	19:07_x000D_ 【吉电股份：签订大安风光制绿氢合成氨一体化示范项目PEM制氢设备供货合同】财联社3月20日电，吉电股份公告，全资子公司大安吉电绿氢能源有限公司拟与长春绿动氢能科技有限公司签订大安风光制绿氢合成氨一体化示范项目PEM制氢设备供货合同，合同价格为2.9亿元。
20230321	13:10 _x000D_ [[+_+]]_x000D_ 专享 专享_x000D_ 【风口研报·行业】微软又一重磅发布，连英伟达也是靠这个业务发家，分析师称该行业和人工智能相结合才是必然选择、或驱动板块长期估值中枢提升 解锁直达>>	13:10 _x000D_ [[+_+]]_x000D_ 专享 专享_x000D_ 【风口研报·行业】微软又一重磅发布，连英伟达也是靠这个业务发家，分析师称该行业和人工智能相结合才是必然选择、或驱动板块长期估值中枢提升 解锁直达>>
20230322	20:40 _x000D_ [[+_+]]_x000D_ 专享 专享_x000D_ 【风口研报·公司】微软引领AI+办公应用史诗级革命，加之信创催化，分析师强call公司业绩将迎快速增长，且10个交易日内还有望迎重大利好；另有一数字基建设施	20:40 _x000D_ [[+_+]]_x000D_ 专享 专享_x000D_ 【风口研报·公司】微软引领AI+办公应用史诗级革命，加之信创催化，分析师强call公司业绩将迎快速增长，且10个交易日内还有望迎重大利好；另有一数字基建设施为数不多的洼地，近期外需爆发 解锁直达>>
20230330	【郑州市与科大讯飞签署战略合作协议 围绕做大做强区域总部等方面开展深入合作】财联社3月30日电，郑州市人民政府3月29日与科大讯飞股份有限公司签署战略合作协议，根据协议，双方将围绕做大做强区域总部、推进成果应用转化、培育人工智能产业人才等方面开展深入合作。	07:46_x000D_ 【郑州市与科大讯飞签署战略合作协议 围绕做大做强区域总部等方面开展深入合作】财联社3月30日电，郑州市人民政府3月29日与科大讯飞股份有限公司签署战略合作协议，根据协议，双方将围绕做大做强区域总部、推进成果应用转化、培育人工智能产业人才等方面开展深入合作。
20230821	【午评：三大指数小幅下跌 算力、环保概念股逆势活跃】财联社8月21日电，市场早盘震荡下跌，三大指数盘中均续创调整新低，创业板指领跌。盘面上，AI概念股展开反弹，算力方向领涨，亚康股份、鸿博股份涨停；数据要素概念股震荡走强，新炬网络、达华智能涨停；信创概念股迎来反弹，久其软件、南天信息、英飞拓涨停。环保股盘中拉升，东方园林、太和水、启迪环境等多股涨停。次新股继续活跃，碧兴物联、国泰环保、海通发展涨停。下跌方面，机场股大跌，上海机场、白云机场双双跌停。券商股展开调整，华泰证券跌近5%。总体上个股涨多跌少，两市近2700只个上涨。沪深两市今日成交额4238亿，较上个交易日缩量236亿。板块方面，算力租赁、环保、CPO、国资云等板块涨幅居前，机场、证券、医药商业、物流等板块跌幅居前。截至收盘，沪指跌0.38%，深成指跌0.24%，创业板指跌0.62%。北向资金方面，沪股通早盘净流出18.88亿，…	11:32:22_x000D_ 【午评：三大指数小幅下跌 算力、环保概念股逆势活跃】财联社8月21日电，市场早盘震荡下跌，三大指数盘中均续创调整新低，创业板指领跌。盘面上，AI概念股展开反弹，算力方向领涨，亚康股份、鸿博股份涨停；数据要素概念股震荡走强，新炬网络、达华智能涨停；信创概念股迎来反弹，久其软件、南天信息、英飞拓涨停。环保股盘中拉升，东方园林、太和水、启迪环境等多股涨停。次新股继续活跃，碧兴物联、国泰环保、海通发展涨停。下跌方面，机场股大跌，上海机场、白云机场双双跌停。券商股展开调整，华泰证券跌近5%。总体上个股涨多跌少，两市近2700只个上涨。沪深两市今日成交额4238亿，较上个交易日缩量236亿。板块方面，算力租赁、环保、CPO、国资云等板块涨幅居前，机场、证券、医药商业、物流等板块跌幅居前。截至收盘，沪指跌0.38%，深成指跌0.24%，创业板指跌0.62%。北向资金方面…
20230606	【利德曼：取得两项医疗器械注册证】财联社6月6日电，利德曼公告，公司近日取得B因子（BF）测定试剂盒（免疫比浊法）和脂蛋白磷脂酶A2（Lp-PLA2）测定试剂盒（乳胶免疫比浊法）医疗器械注册证。	16:26:10_x000D_ 【利德曼：取得两项医疗器械注册证】财联社6月6日电，利德曼公告，公司近日取得B因子（BF）测定试剂盒（免疫比浊法）和脂蛋白磷脂酶A2（Lp-PLA2）测定试剂盒（乳胶免疫比浊法）医疗器械注册证。
20230609	14:01 _x000D_ [[+_+]]_x000D_ 专享 专享_x000D_ 【风口研报·公司】光伏topcon电池出货占比提升，这家公司卡位关键环节核心产品有望实现量价齐升，且耗材属性不受产能过剩影响 解锁直达>>	14:01 _x000D_ [[+_+]]_x000D_ 专享 专享_x000D_ 【风口研报·公司】光伏topcon电池出货占比提升，这家公司卡位关键环节核心产品有望实现量价齐升，且耗材属性不受产能过剩影响 解锁直达>>
20230611	【去年结婚人数创37年来新低 近9年结婚人数下降49.3%】财联社6月11日电，民政部最新发布的统计季报数据显示，2022年我国结婚人数为683.3万对。梳理数据发现，这一数据创下了1986年（民政部网站公布有1986年以来的数据）来的新低。同时，这也是自2013年达到1346.9万对的最高峰后，结婚人数连续9年下降。从数据来看，2022年结婚登记人数比上一年减少了80.3万对，下降10.5%。与2013年最高峰相比，9年来，我国结婚人数下降了49.3%，下降幅度近半。 (第一财经)	18:58:40_x000D_ 【去年结婚人数创37年来新低 近9年结婚人数下降49.3%】财联社6月11日电，民政部最新发布的统计季报数据显示，2022年我国结婚人数为683.3万对。梳理数据发现，这一数据创下了1986年（民政部网站公布有1986年以来的数据）来的新低。同时，这也是自2013年达到1346.9万对的最高峰后，结婚人数连续9年下降。从数据来看，2022年结婚登记人数比上一年减少了80.3万对，下降10.5%。与2013年最高峰相比，9年来，我国结婚人数下降了49.3%，下降幅度近半。 (第一财经)
20230728	【爱仕达：股东富创投资拟减持不超2%股份】财联社7月28日电，爱仕达公告，股东富创投资拟减持不超2%股份。	18:16:51_x000D_ 【爱仕达：股东富创投资拟减持不超2%股份】财联社7月28日电，爱仕达公告，股东富创投资拟减持不超2%股份。
20230731	【药明康德：上半年净利润同比增长14.61%】财联社7月31日电，药明康德公告，上半年净利润53.13亿元，同比增长14.61%。	18:02:14_x000D_ 【药明康德：上半年净利润同比增长14.61%】财联社7月31日电，药明康德公告，上半年净利润53.13亿元，同比增长14.61%。
20230731	【闻泰科技：拟以1亿元-2亿元回购股份】财联社7月31日电，闻泰科技公告，拟以1亿元-2亿元回购股份，回购价格不超过72元/股。	20:12:02_x000D_ 【闻泰科技：拟以1亿元-2亿元回购股份】财联社7月31日电，闻泰科技公告，拟以1亿元-2亿元回购股份，回购价格不超过72元/股。
20230808	14:51 _x000D_ [[+_+]]_x000D_ 专享 专享_x000D_ 【电报解读】国家层面首个氢能全产业链标准体系出台，我国2030年氢气需求量将达到3715万吨，这家公司已搭建氢气“制-储-运-加-用”产业链 解锁直达>>	14:51 _x000D_ [[+_+]]_x000D_ 专享 专享_x000D_ 【电报解读】国家层面首个氢能全产业链标准体系出台，我国2030年氢气需求量将达到3715万吨，这家公司已搭建氢气“制-储-运-加-用”产业链 解锁直达>>
20230223	【中科曙光业绩快报：2022年净利润同比增长31%】财联社2月23日电，中科曙光公告业绩快报，2022年公司实现营业收入130.09亿元，同比增长15.56%；归母净利润15.15亿元，同比增长30.92%。	16:55_x000D_ 【中科曙光业绩快报：2022年净利润同比增长31%】财联社2月23日电，中科曙光公告业绩快报，2022年公司实现营业收入130.09亿元，同比增长15.56%；归母净利润15.15亿元，同比增长30.92%。
20230814	【苑东生物：拟使用1亿元-2亿元回购公司股份】财联社8月14日电，苑东生物公告，拟使用1-2亿元回购公司股份，回购价格不超过人民币73元/股。	18:36:48_x000D_ 【苑东生物：拟使用1亿元-2亿元回购公司股份】财联社8月14日电，苑东生物公告，拟使用1-2亿元回购公司股份，回购价格不超过人民币73元/股。
20230815	【安杰思：上半年净利润同比增长44.16%】财联社8月15日电，安杰思披露半年报，上半年公司实现营业收入2.06亿元，同比增长30.7%；净利润7880.17万元，同比增长44.16%；基本每股收益1.72元。	19:31:00_x000D_ 【安杰思：上半年净利润同比增长44.16%】财联社8月15日电，安杰思披露半年报，上半年公司实现营业收入2.06亿元，同比增长30.7%；净利润7880.17万元，同比增长44.16%；基本每股收益1.72元。
20230130	【华能国际：2022年预亏70亿元-84亿元】财联社1月30日电，华能国际发布业绩预告，预计2022年年度实现归属于母公司所有者的净亏损为70亿元到84亿元。2022年公司煤电经营同比大幅减亏；但由于本年度煤价仍居高位，且公司煤机装机比例较高，新能源发电盈利未能覆盖煤电亏损等，导致公司总体亏损。	18:33_x000D_ 【华能国际：2022年预亏70亿元-84亿元】财联社1月30日电，华能国际发布业绩预告，预计2022年年度实现归属于母公司所有者的净亏损为70亿元到84亿元。2022年公司煤电经营同比大幅减亏；但由于本年度煤价仍居高位，且公司煤机装机比例较高，新能源发电盈利未能覆盖煤电亏损等，导致公司总体亏损。
20230304	【中国国防费保持适度合理增长】财联社3月4日电，十四届全国人大一次会议大会发言人王超说，国防费的规模，是综合考虑国防建设的需求和国民经济发展的水平而确定的，这也是世界各国的通行做法。国防费的增长，既是应对复杂安全挑战的需要，也是履行大国责任的需要。中国国防费占国内生产总值的比重多年保持基本稳定，低于世界平均水平，增长幅度也是比较适度、合理的。中国的前途是同世界的前途紧密联系在一起的。中国的军事现代化，不会对任何国家构成威胁，反而是维护地区稳定与世界和平的积极力量。	13:10_x000D_ 【中国国防费保持适度合理增长】财联社3月4日电，十四届全国人大一次会议大会发言人王超说，国防费的规模，是综合考虑国防建设的需求和国民经济发展的水平而确定的，这也是世界各国的通行做法。国防费的增长，既是应对复杂安全挑战的需要，也是履行大国责任的需要。中国国防费占国内生产总值的比重多年保持基本稳定，低于世界平均水平，增长幅度也是比较适度、合理的。中国的前途是同世界的前途紧密联系在一起的。中国的军事现代化，不会对任何国家构成威胁，反而是维护地区稳定与世界和平的积极力量。
20230314	【午评：创业板指跌超1%抹去年内涨幅 两市超4200只个股下跌】财联社3月14日电，市场早盘低开低走，临近上午收盘前有所反弹，创业板指领跌已抹去年内涨幅。盘面上，黄金概念股开盘大涨，晓程科技涨超10%，中润资源涨超9%。养殖概念股震荡走强，新五丰涨停。芯片股盘中异动，中芯国际一度涨近10%，金力泰20CM涨停，富乐德涨超10%。数字经济概念股走势分化，太极股份、深桑达A、三六零等均创阶段新高。下跌方面，储能等赛道股集体调整，固德威跌超10%，盛弘股份、阳光电源跌超7%。总体上个股跌多涨少，两市超4200只个股下跌。沪深两市今日成交额5979亿，较上个交易日放量852亿。板块方面，黄金、猪肉、光刻胶、中芯国际概念等板块涨幅居前，超导、油气、汽车零部件、储能等板块跌幅居前。截至上午收盘，沪指跌0.88%，深成指跌1.16%，创业板指跌1.26%。北向资金方面，沪股通早盘净流出8.01亿，深股…	11:33_x000D_ 【午评：创业板指跌超1%抹去年内涨幅 两市超4200只个股下跌】财联社3月14日电，市场早盘低开低走，临近上午收盘前有所反弹，创业板指领跌已抹去年内涨幅。盘面上，黄金概念股开盘大涨，晓程科技涨超10%，中润资源涨超9%。养殖概念股震荡走强，新五丰涨停。芯片股盘中异动，中芯国际一度涨近10%，金力泰20CM涨停，富乐德涨超10%。数字经济概念股走势分化，太极股份、深桑达A、三六零等均创阶段新高。下跌方面，储能等赛道股集体调整，固德威跌超10%，盛弘股份、阳光电源跌超7%。总体上个股跌多涨少，两市超4200只个股下跌。沪深两市今日成交额5979亿，较上个交易日放量852亿。板块方面，黄金、猪肉、光刻胶、中芯国际概念等板块涨幅居前，超导、油气、汽车零部件、储能等板块跌幅居前。截至上午收盘，沪指跌0.88%，深成指跌1.16%，创业板指跌1.26%。北向资金方面，沪股通…
20230515	17:05 _x000D_ [[+_+]]_x000D_ 专享 专享_x000D_ 【电报解读】谷歌将推出新工具以识别虚假信息和AI生成内容，机构称安全保护在AI流程中不可或缺，这家企业能准确识别多种AI伪造技术生成的虚假图片、视频 解锁直	17:05 _x000D_ [[+_+]]_x000D_ 专享 专享_x000D_ 【电报解读】谷歌将推出新工具以识别虚假信息和AI生成内容，机构称安全保护在AI流程中不可或缺，这家企业能准确识别多种AI伪造技术生成的虚假图片、视频 解锁直达>>
20230523	13:14 _x000D_ [[+_+]]_x000D_ 专享 专享_x000D_ 【盘中宝】这个行业关注度提升，多种配套政策出台，市场扩容或带来价值重估与配套环节受益，这家公司已开始在全国布局相关业务 解锁直达>>	13:14 _x000D_ [[+_+]]_x000D_ 专享 专享_x000D_ 【盘中宝】这个行业关注度提升，多种配套政策出台，市场扩容或带来价值重估与配套环节受益，这家公司已开始在全国布局相关业务 解锁直达>>
20230524	【杭氧股份：投资设立山西杭沃氢能科技有限公司】财联社5月24日电，杭氧股份公告，为开展氢能源项目战略合作，拟与山西晋南钢铁集团有限公司、宁波保税区巨杉投资管理有限公司及5名自然人股东以货币形式共同出资1.5亿元投资设立山西杭沃氢能科技有限公司。	16:53:41_x000D_ 【杭氧股份：投资设立山西杭沃氢能科技有限公司】财联社5月24日电，杭氧股份公告，为开展氢能源项目战略合作，拟与山西晋南钢铁集团有限公司、宁波保税区巨杉投资管理有限公司及5名自然人股东以货币形式共同出资1.5亿元投资设立山西杭沃氢能科技有限公司。
20230601	09:00 _x000D_ [[+_+]]_x000D_ 专享 专享_x000D_ 【电报解读】广东抓紧组建省半导体及集成电路产业投资基金二期，AI或开启半导体新周期，这家本地企业已与国内高校成立人工智能芯片实验室 解锁直达>>	09:00 _x000D_ [[+_+]]_x000D_ 专享 专享_x000D_ 【电报解读】广东抓紧组建省半导体及集成电路产业投资基金二期，AI或开启半导体新周期，这家本地企业已与国内高校成立人工智能芯片实验室 解锁直达>>
20230224	【隆华科技：公司技术中心被认定为国家企业技术中心】财联社2月24日电，隆华科技公告，公司技术中心被认定为2022年（第29批）国家企业技术中心，按照《国家企业技术中心认定管理办法》规定，可享受国家相关政策支持。	16:00_x000D_ 【隆华科技：公司技术中心被认定为国家企业技术中心】财联社2月24日电，隆华科技公告，公司技术中心被认定为2022年（第29批）国家企业技术中心，按照《国家企业技术中心认定管理办法》规定，可享受国家相关政策支持。
20230102	【中信建投：预计2023年资金面的担忧将逐步得到缓解 A股整体表现或较好】财联社1月1日电，中信建投策略发文表示，截至11月份，2022年居民存款累计新增存款高达14.95万亿，环比去年多增约5万亿，是历史同期从未出现过的水平。超额储蓄预示着资金上并无担忧，核心仍在于信心修复的时间及斜率。届时一旦信心重拾，居民资产负债表走向修复，风险偏好提升下积压的超额储蓄流至股市可期。我们预计2023年资金面的担忧将逐步得到缓解，有望转为增量博弈，同时考虑到估值水平决定反弹高度，当前A股处于历史低估值区域，具备估值上的优势，在估值因素和流动性因素的双重作用下， 2023年A股整体表现或较好。	20:43_x000D_ 【中信建投：预计2023年资金面的担忧将逐步得到缓解 A股整体表现或较好】财联社1月1日电，中信建投策略发文表示，截至11月份，2022年居民存款累计新增存款高达14.95万亿，环比去年多增约5万亿，是历史同期从未出现过的水平。超额储蓄预示着资金上并无担忧，核心仍在于信心修复的时间及斜率。届时一旦信心重拾，居民资产负债表走向修复，风险偏好提升下积压的超额储蓄流至股市可期。我们预计2023年资金面的担忧将逐步得到缓解，有望转为增量博弈，同时考虑到估值水平决定反弹高度，当前A股处于历史低估值区域，具备估值上的优势，在估值因素和流动性因素的双重作用下， 2023年A股整体表现或较好。
20230626	【收评：三大指数均跌超1% AI概念股持续大跌】财联社6月26日电，大盘全天低开低走，三大指数均跌超1%。盘面上，电力股逆势大涨，桂东电力、深南电A、新中港等超10股涨停。复合集流体概念股再度走强，双星新材、英联股份涨停。光伏等新能源赛道股冲高回落，帝科股份、宝馨股份、鼎际得等涨超5%。下跌方面，AI概念股持续大跌，剑桥科技、慈文传媒等多股跌停，海天瑞声、昆仑万维等多股跌超10%。总体上个股跌多涨少，两市超4000只个股下跌，连续两个交易日超4000只个股下跌。沪深两市今日成交额9773亿，较上个交易日缩量446亿。板块方面，电力、燃气、复合集流体、贵金属等板块涨幅居前，ChatGPT、数据要素、云游戏、英伟达概念等板块跌幅居前。截至收盘，沪指跌1.48%，深成指跌1.68%，创业板指跌1.16%。北向资金全天净买入21.17亿元，其中沪股通净卖出17.3亿元，深股通净买入38.47亿元。	15:03:43_x000D_ 【收评：三大指数均跌超1% AI概念股持续大跌】财联社6月26日电，大盘全天低开低走，三大指数均跌超1%。盘面上，电力股逆势大涨，桂东电力、深南电A、新中港等超10股涨停。复合集流体概念股再度走强，双星新材、英联股份涨停。光伏等新能源赛道股冲高回落，帝科股份、宝馨股份、鼎际得等涨超5%。下跌方面，AI概念股持续大跌，剑桥科技、慈文传媒等多股跌停，海天瑞声、昆仑万维等多股跌超10%。总体上个股跌多涨少，两市超4000只个股下跌，连续两个交易日超4000只个股下跌。沪深两市今日成交额9773亿，较上个交易日缩量446亿。板块方面，电力、燃气、复合集流体、贵金属等板块涨幅居前，ChatGPT、数据要素、云游戏、英伟达概念等板块跌幅居前。截至收盘，沪指跌1.48%，深成指跌1.68%，创业板指跌1.16%。北向资金全天净买入21.17亿元，其中沪股通净卖出17.3…
20230628	【印度在全球各国寻找铜矿与锂矿资源】财联社6月28日电，印度政府消息人士称，印度一家国有公司即将与阿根廷签署协议，购买少量锂矿，并正在智利寻找锂矿。此外，印度在蒙古寻找铜矿资源，团队将于9月访问蒙古。	23:25:10_x000D_ 【印度在全球各国寻找铜矿与锂矿资源】财联社6月28日电，印度政府消息人士称，印度一家国有公司即将与阿根廷签署协议，购买少量锂矿，并正在智利寻找锂矿。此外，印度在蒙古寻找铜矿资源，团队将于9月访问蒙古。
20230714	【金力永磁：已与中国稀土、北方稀土等主要稀土供货商建立合作关系】财联社7月14日电，金力永磁接受机构调研时表示，公司已经与中国稀土集团、北方稀土等主要稀土供货商建立战略合作关系，北方稀土是公司稀土原材料的主要供应商之一。此外，第一季度公司在机器人及工业伺服电机领域的收入为0.58亿元，同比增长34%。	13:33:01_x000D_ 【金力永磁：已与中国稀土、北方稀土等主要稀土供货商建立合作关系】财联社7月14日电，金力永磁接受机构调研时表示，公司已经与中国稀土集团、北方稀土等主要稀土供货商建立战略合作关系，北方稀土是公司稀土原材料的主要供应商之一。此外，第一季度公司在机器人及工业伺服电机领域的收入为0.58亿元，同比增长34%。
20230724	20:40 _x000D_ [[+_+]]_x000D_ 专享 专享_x000D_ 【风口研报·公司】北美制造业回流+人形机器人打开想象空间，分析师强call公司对标国际巨头库卡和柯马、市场地位位列北美前三，订单有望保持高增；另有家“黑马”	20:40 _x000D_ [[+_+]]_x000D_ 专享 专享_x000D_ 【风口研报·公司】北美制造业回流+人形机器人打开想象空间，分析师强call公司对标国际巨头库卡和柯马、市场地位位列北美前三，订单有望保持高增；另有家“黑马”8-9月有望迎来预期行情 解锁直达>>
20230106	【中证协：有条件券商未来3年IT平均投入不少于平均净利8%或营收6%】财联社1月6日电，财联社记者最新获悉，中证协向券商下发了《网络和信息安全三年提升计划（2023-2025）》征求意见稿，提出33项重点工作，券商可在2023年底前制定全方位的网络和信息科技战略发展规划，明确实施策略和具体路径，并每年进行动态修订和持续完善。《三年提升计划》鼓励有条件的券商未来三年信息科技平均投入金额不少于平均净利润的8%或平均营业收入的6%，有条件的券商积极推进新一代核心系统的建设，开展核心系统技术架构的转型升级工作。计划还要求券商要持续提升信息系统故障发现能力、全面提高事件预警及处置效率、健全组织级应急响应管理机制等。中证协称，力争到2025年，通过组织引导券商积极落实各项行动举措，促进证券行业网络和信息安全建设取得扎实成效。（记者 林坚）	11:56_x000D_ 【中证协：有条件券商未来3年IT平均投入不少于平均净利8%或营收6%】财联社1月6日电，财联社记者最新获悉，中证协向券商下发了《网络和信息安全三年提升计划（2023-2025）》征求意见稿，提出33项重点工作，券商可在2023年底前制定全方位的网络和信息科技战略发展规划，明确实施策略和具体路径，并每年进行动态修订和持续完善。《三年提升计划》鼓励有条件的券商未来三年信息科技平均投入金额不少于平均净利润的8%或平均营业收入的6%，有条件的券商积极推进新一代核心系统的建设，开展核心系统技术架构的转型升级工作。计划还要求券商要持续提升信息系统故障发现能力、全面提高事件预警及处置效率、健全组织级应急响应管理机制等。中证协称，力争到2025年，通过组织引导券商积极落实各项行动举措，促进证券行业网络和信息安全建设取得扎实成效。（记者 林坚）
20230111	【浙商中拓业绩快报：2022年净利润10.04亿元 同比增22.6%】财联社1月11日电，浙商中拓发布业绩快报，2022年营业收入为1954.29亿元，同比增长9.63%；归母净利润10.04亿元，同比增长22.60%；基本每股收益1.41元。报告期内，公司加大数字“天网”和物流“地网”融合力度，积极推进新能源产业链布局，进一步提升风险管控能力和价格管理能力，经营质量和经营效益持续提升。	20:39_x000D_ 【浙商中拓业绩快报：2022年净利润10.04亿元 同比增22.6%】财联社1月11日电，浙商中拓发布业绩快报，2022年营业收入为1954.29亿元，同比增长9.63%；归母净利润10.04亿元，同比增长22.60%；基本每股收益1.41元。报告期内，公司加大数字“天网”和物流“地网”融合力度，积极推进新能源产业链布局，进一步提升风险管控能力和价格管理能力，经营质量和经营效益持续提升。
20230216	【芯片股震荡回落 算力方向领跌】财联社2月16日电，寒武纪、海光信息、景嘉微、佰维存储、艾为电子跌超5%，龙芯中科、中科曙光、必易微、力芯微等跟跌。	13:49_x000D_ 【芯片股震荡回落 算力方向领跌】财联社2月16日电，寒武纪、海光信息、景嘉微、佰维存储、艾为电子跌超5%，龙芯中科、中科曙光、必易微、力芯微等跟跌。
20230202	【步长制药：拟签订战略合作框架协议书】财联社2月2日电，步长制药公告，拟与石家庄高新技术产业开发区管理委员会签订《战略合作框架协议书》，就公司在石家庄市国际生物医药园的项目投资建设进行战略框架性约定。	16:58_x000D_ 【步长制药：拟签订战略合作框架协议书】财联社2月2日电，步长制药公告，拟与石家庄高新技术产业开发区管理委员会签订《战略合作框架协议书》，就公司在石家庄市国际生物医药园的项目投资建设进行战略框架性约定。
20230221	【亚太科技：2022年度净利润同比增长49%】财联社2月21日电，亚太科技发布业绩快报，2022年实现营业总收入67.49亿元，同比增长12.16%；归母净利润6.84亿元，同比增长49.38%。报告期内，公司通过产品持续创新紧紧抓住汽车轻量化、新能源化的产业机遇，持续开发供应包括新能源汽车在内的汽车领域用铝，同时积极开发航空航天、军民融合等非汽车行业市场，公司订单稳定增长。	18:47_x000D_ 【亚太科技：2022年度净利润同比增长49%】财联社2月21日电，亚太科技发布业绩快报，2022年实现营业总收入67.49亿元，同比增长12.16%；归母净利润6.84亿元，同比增长49.38%。报告期内，公司通过产品持续创新紧紧抓住汽车轻量化、新能源化的产业机遇，持续开发供应包括新能源汽车在内的汽车领域用铝，同时积极开发航空航天、军民融合等非汽车行业市场，公司订单稳定增长。
20230120	【ST大集：2022年预亏7亿元-13亿元】财联社1月20日电，ST大集发布业绩预告，预计2022年净利润亏损7亿元-13亿元，上年同期亏损6.87亿元。报告期内，公司对有减值迹象的商誉、长期资产计提资产减值约8亿-12亿元；公司因重整事项预计形成债务重组收益约6.7亿元；公司旗下子公司天津、海南、广东多地区百货商超业务不断受到疫情冲击。	20:15_x000D_ 【ST大集：2022年预亏7亿元-13亿元】财联社1月20日电，ST大集发布业绩预告，预计2022年净利润亏损7亿元-13亿元，上年同期亏损6.87亿元。报告期内，公司对有减值迹象的商誉、长期资产计提资产减值约8亿-12亿元；公司因重整事项预计形成债务重组收益约6.7亿元；公司旗下子公司天津、海南、广东多地区百货商超业务不断受到疫情冲击。
20230130	顺丰控股：预计2022年净利60.5亿元-62.5亿元，同比增42%–46%。	19:15_x000D_ 顺丰控股：预计2022年净利60.5亿元-62.5亿元，同比增42%–46%。
20230306	【陕西煤业业绩快报：2022年度净利润同比增长64%】财联社3月6日电，陕西煤业发布业绩快报，2022年营业收入为1692.09亿元，同比增长11.1%；净利润351.49亿元，同比增长64.1%；基本每股收益3.63元。	15:40_x000D_ 【陕西煤业业绩快报：2022年度净利润同比增长64%】财联社3月6日电，陕西煤业发布业绩快报，2022年营业收入为1692.09亿元，同比增长11.1%；净利润351.49亿元，同比增长64.1%；基本每股收益3.63元。
20230317	【拓尔思：公司以大模型为基础的生成类应用新产品正在研发 将在短期内推出系列AIGC产品】财联社3月17日电，拓尔思接受机构调研时表示，在大模型时代，拓尔思将以“专业大模型+领域知识数据”为核心，以NLP技术突破来推动更多AI内容生成的商业落地。在人工智能业务布局方面，公司以大模型为基础的生成类应用新产品研发工作正在进行中，将在短期内推出系列AIGC产品。目前，公司打造了产业大脑、媒体资讯、网络舆情三大数据资产平台，其中，媒体资讯领域的“数家资讯大数据服务平台”通过聚焦传媒领域的数据场景云服务，覆盖了从中央到地方等数百家媒体机构用户，成为媒体大数据的国内市场占有率第一。	22:23_x000D_ 【拓尔思：公司以大模型为基础的生成类应用新产品正在研发 将在短期内推出系列AIGC产品】财联社3月17日电，拓尔思接受机构调研时表示，在大模型时代，拓尔思将以“专业大模型+领域知识数据”为核心，以NLP技术突破来推动更多AI内容生成的商业落地。在人工智能业务布局方面，公司以大模型为基础的生成类应用新产品研发工作正在进行中，将在短期内推出系列AIGC产品。目前，公司打造了产业大脑、媒体资讯、网络舆情三大数据资产平台，其中，媒体资讯领域的“数家资讯大数据服务平台”通过聚焦传媒领域的数据场景云服务，覆盖了从中央到地方等数百家媒体机构用户，成为媒体大数据的国内市场占有率第一。
20230508	【珍宝岛：分公司获得帕瑞昔布钠化学原料药上市申请批准通知书】财联社5月8日电，珍宝岛公告，分公司黑龙江珍宝岛药业股份有限公司鸡西分公司收到国家药监局颁发的关于帕瑞昔布钠的《化学原料药上市申请批准通知书》。	16:23:36_x000D_ 【珍宝岛：分公司获得帕瑞昔布钠化学原料药上市申请批准通知书】财联社5月8日电，珍宝岛公告，分公司黑龙江珍宝岛药业股份有限公司鸡西分公司收到国家药监局颁发的关于帕瑞昔布钠的《化学原料药上市申请批准通知书》。
20230216	【新乡化纤：市场价格上涨库存降低 氨纶开工率已达100%】财联社2月16日电，财联社记者近期从新乡化纤调研获悉：“氨纶价格已走出底部区间，目前公司产品库存处于低位水平，去年同期最高曾达到2个月。此前氨纶产能有所控制，现处于恢复期，开工率已达到100%，10万吨高品质超细旦氨纶纤维项目三期工程预计今年年底完工。”根据百川盈孚研报，截至2月9日，国内氨纶20D价格40500元/吨，30D价格37500元/吨，40D价格35000元/吨，各品种较春节前上涨2000元-3000元/吨，行业平均库存在 35.5 天左右。（财联社记者 张晨静）	15:09_x000D_ 【新乡化纤：市场价格上涨库存降低 氨纶开工率已达100%】财联社2月16日电，财联社记者近期从新乡化纤调研获悉：“氨纶价格已走出底部区间，目前公司产品库存处于低位水平，去年同期最高曾达到2个月。此前氨纶产能有所控制，现处于恢复期，开工率已达到100%，10万吨高品质超细旦氨纶纤维项目三期工程预计今年年底完工。”根据百川盈孚研报，截至2月9日，国内氨纶20D价格40500元/吨，30D价格37500元/吨，40D价格35000元/吨，各品种较春节前上涨2000元-3000元/吨，行业平均库存在 35.5 天左右。（财联社记者 张晨静）
20230611	【迪哲医药：系列在研产品研究成果在国际恶性淋巴瘤大会报告】财联社6月11日电，迪哲医药公告，公司在2023年第17届国际恶性淋巴瘤大会（ICML）报告了公司两大领先产品戈利昔替尼（DZD4205）和DZD8586的2项源头创新成果，其中戈利昔替尼的全球注册临床结果获选大会口头报告。迪哲医药介绍，ICML是全球最大的恶性淋巴瘤国际会议，目前上述在研产品尚处于临床试验阶段。	16:06:47_x000D_ 【迪哲医药：系列在研产品研究成果在国际恶性淋巴瘤大会报告】财联社6月11日电，迪哲医药公告，公司在2023年第17届国际恶性淋巴瘤大会（ICML）报告了公司两大领先产品戈利昔替尼（DZD4205）和DZD8586的2项源头创新成果，其中戈利昔替尼的全球注册临床结果获选大会口头报告。迪哲医药介绍，ICML是全球最大的恶性淋巴瘤国际会议，目前上述在研产品尚处于临床试验阶段。
20230621	【主力资金监控：三六零净卖出超7亿元】财联社6月21日电，财联社星矿数据显示，今日早盘主力资金净流入银行、汽车、港口等板块，净流出文化传媒、医药生物、非银金融等板块，其中文化传媒板块净流出超39亿元。个股方面，N国科大涨，主力资金净买入3.25亿元，景嘉微、N威士顿、焦点科技获主力资金净流入居前；三六零遭净卖出超7亿元，昆仑万维、中科曙光、药明康德主力资金净流出额居前。	10:57:21_x000D_ 【主力资金监控：三六零净卖出超7亿元】财联社6月21日电，财联社星矿数据显示，今日早盘主力资金净流入银行、汽车、港口等板块，净流出文化传媒、医药生物、非银金融等板块，其中文化传媒板块净流出超39亿元。个股方面，N国科大涨，主力资金净买入3.25亿元，景嘉微、N威士顿、焦点科技获主力资金净流入居前；三六零遭净卖出超7亿元，昆仑万维、中科曙光、药明康德主力资金净流出额居前。
20230828	【ST升达：收到原实际控制人刑事判决书】财联社8月28日电，ST升达公告，公司收到原实际控制人刑事判决书：被告人江昌政犯背信损害上市公司利益罪，判处有期徒刑三年六个月，并处罚金100万元；犯违规不披露重要信息罪，判处有期徒刑一年六个月，并处罚金20万元。决定执行有期徒刑四年，并处罚金120万元。被告人江山犯背信损害上市公司利益罪，判处有期徒刑二年，并处罚金50万元；犯违规不披露重要信息罪，判处有期徒刑一年，并处罚金15万元。决定执行有期徒刑二年六个月，并处罚金65万元。被告人江昌浩犯背信损害上市公司利益罪，判处有期徒刑一年，缓刑二年，并处罚金30万元。本次事项不会对公司生产经营造成影响。	16:47:09_x000D_ 【ST升达：收到原实际控制人刑事判决书】财联社8月28日电，ST升达公告，公司收到原实际控制人刑事判决书：被告人江昌政犯背信损害上市公司利益罪，判处有期徒刑三年六个月，并处罚金100万元；犯违规不披露重要信息罪，判处有期徒刑一年六个月，并处罚金20万元。决定执行有期徒刑四年，并处罚金120万元。被告人江山犯背信损害上市公司利益罪，判处有期徒刑二年，并处罚金50万元；犯违规不披露重要信息罪，判处有期徒刑一年，并处罚金15万元。决定执行有期徒刑二年六个月，并处罚金65万元。被告人江昌浩犯背信损害上市公司利益罪，判处有期徒刑一年，缓刑二年，并处罚金30万元。本次事项不会对公司生产经营造成影响。
20230829	【香雪制药：控股股东提前终止减持计划】财联社8月29日电，香雪制药公告，近日，公司收到公司控股股东昆仑投资出具的《关于提前终止股份减持计划的告知函》。根据中国证监会进一步规范股份减持行为的规定，并结合自身情况，昆仑投资对减持计划予以提前终止。	19:41:04_x000D_ 【香雪制药：控股股东提前终止减持计划】财联社8月29日电，香雪制药公告，近日，公司收到公司控股股东昆仑投资出具的《关于提前终止股份减持计划的告知函》。根据中国证监会进一步规范股份减持行为的规定，并结合自身情况，昆仑投资对减持计划予以提前终止。
20230830	【海航控股：上半年净亏损16.09亿元】财联社8月30日电，海航控股披露半年报，上半年净利润为亏损16.09亿元，上年同期净亏损128.37亿元。	18:02:31_x000D_ 【海航控股：上半年净亏损16.09亿元】财联社8月30日电，海航控股披露半年报，上半年净利润为亏损16.09亿元，上年同期净亏损128.37亿元。
20230821	【8月LPR报价出炉：5年期维持在4.2%不变 1年期降10个基点】财联社8月21日电，8月1年期贷款市场报价利率（LPR）报3.45%，上月为3.55%；5年期以上LPR报4.2%，上月为4.2%。	09:15:45_x000D_ 【8月LPR报价出炉：5年期维持在4.2%不变 1年期降10个基点】财联社8月21日电，8月1年期贷款市场报价利率（LPR）报3.45%，上月为3.55%；5年期以上LPR报4.2%，上月为4.2%。
20230824	【*ST佳沃：智利海域为距离日本最远海域 目前看不会对公司智利三文鱼养殖有大的影响】财联社8月24日电，*ST佳沃在互动平台表示，日本海域的洋流方向是往白令海峡，到美国后再向南流至赤道，受赤道温差影响向西流动，属于北半球领域的回流。而智利海域位于南半球，并且为距离日本最远的海域，其受到的辐射影响最小，所以目前看不会对公司智利的三文鱼养殖有大的影响。根据公司一季报数据，公司智利子公司Australis2023年一季度供销售三文鱼22,026吨WFE。分地区的销量情况方面，南美洲占比25.21%；北美洲占比38.11%；欧洲占比22.94%；亚太地区占比13.74%。	14:11:39_x000D_ 【*ST佳沃：智利海域为距离日本最远海域 目前看不会对公司智利三文鱼养殖有大的影响】财联社8月24日电，*ST佳沃在互动平台表示，日本海域的洋流方向是往白令海峡，到美国后再向南流至赤道，受赤道温差影响向西流动，属于北半球领域的回流。而智利海域位于南半球，并且为距离日本最远的海域，其受到的辐射影响最小，所以目前看不会对公司智利的三文鱼养殖有大的影响。根据公司一季报数据，公司智利子公司Australis2023年一季度供销售三文鱼22,026吨WFE。分地区的销量情况方面，南美洲占比25.21%；北美洲占比38.11%；欧洲占比22.94%；亚太地区占比13.74%。
20230410	【五一国内游“提前订”创五年来新高 山东或成今年新“顶流”】财联社4月10日电，据美团、大众点评消息，平台上目前关于五一期间国内的住宿、交通、景点门票等预订量较2019年同期增长约200%，创五年来最高；住宿预订潮更是较2019年同期提前了约两周。综合美团上住宿、景区、交通等旅游相关订单，重庆、西安、长沙、成都、武汉等成为国内热度最高的十大目的地城市。美团认为，山东省有望成为今年五一旅游市场的新“顶流”。美团上，山东省五一假期的住宿提前预订量较2019年增长400%，全国住宿预订最热门的前二十个城市中，青岛、威海、济南、烟台等山东城市占了四席。近期凭借烧烤频频出圈的淄博，五一住宿预订量较2019年上涨800%，增幅位居山东第一。在大众点评上，淄博“烧烤”近一周的搜索量同比上涨700%，笔记数上涨1400%。	23:25:16_x000D_ 【五一国内游“提前订”创五年来新高 山东或成今年新“顶流”】财联社4月10日电，据美团、大众点评消息，平台上目前关于五一期间国内的住宿、交通、景点门票等预订量较2019年同期增长约200%，创五年来最高；住宿预订潮更是较2019年同期提前了约两周。综合美团上住宿、景区、交通等旅游相关订单，重庆、西安、长沙、成都、武汉等成为国内热度最高的十大目的地城市。美团认为，山东省有望成为今年五一旅游市场的新“顶流”。美团上，山东省五一假期的住宿提前预订量较2019年增长400%，全国住宿预订最热门的前二十个城市中，青岛、威海、济南、烟台等山东城市占了四席。近期凭借烧烤频频出圈的淄博，五一住宿预订量较2019年上涨800%，增幅位居山东第一。在大众点评上，淄博“烧烤”近一周的搜索量同比上涨700%，笔记数上涨1400%。
20230316	08:12 _x000D_ [[+_+]]_x000D_ 专享 专享_x000D_ 【点金互动易】人工智能+云计算，GPU服务器可为AI客户提供算力支持，自主研发并提供计算、网络、存储等产品，这家公司数据中心可提供底层云服务 解锁直达>>	08:12 _x000D_ [[+_+]]_x000D_ 专享 专享_x000D_ 【点金互动易】人工智能+云计算，GPU服务器可为AI客户提供算力支持，自主研发并提供计算、网络、存储等产品，这家公司数据中心可提供底层云服务 解锁直达>>
20230319	【瑞士银行提出以至高10亿美元价格收购瑞士信贷】财联社3月19日电，瑞士银行提出以至高10亿美元价格收购瑞士信贷，将以0.25瑞郎/股的价格收购瑞士信贷股票，瑞士当局预计将修改国家法律以绕过瑞士联合银行的股东投票。知情人士表示，瑞士两家最大银行之间的全股票交易最早将于周日晚间签署，而每股0.25瑞郎的价格远低于瑞信上周五1.86瑞郎的收盘价，这几乎会让瑞信的股东血本无归。所有人都强调，形势变化很快，不能保证条款会保持不变，也不能保证达成协议。 (英国金融时报)	19:43_x000D_ 【瑞士银行提出以至高10亿美元价格收购瑞士信贷】财联社3月19日电，瑞士银行提出以至高10亿美元价格收购瑞士信贷，将以0.25瑞郎/股的价格收购瑞士信贷股票，瑞士当局预计将修改国家法律以绕过瑞士联合银行的股东投票。知情人士表示，瑞士两家最大银行之间的全股票交易最早将于周日晚间签署，而每股0.25瑞郎的价格远低于瑞信上周五1.86瑞郎的收盘价，这几乎会让瑞信的股东血本无归。所有人都强调，形势变化很快，不能保证条款会保持不变，也不能保证达成协议。 (英国金融时报)
20230228	【全国政协委员甘华田：建议为第三孩提供从幼儿园到高中毕业的免费教育】财联社2月28日电，第十四届全国政协委员、四川大学华西医院教授甘华田表示，为更有效地鼓励生育，他将提交“关于进一步优化生育配套公共服务供给，提高生育意愿，优化人口结构的提案”，建议“为生育二孩、三孩的家庭发放教育专项补贴，为第三孩提供从幼儿园到高中毕业阶段的免费教育”。甘华田认为，目前，“二孩”“三孩”政策对我国总体生育率的影响不如预期。他说，不愿生的原因很多，教育问题是最重要的一个“拦路虎”，要解决这一问题，给三孩提供免费教育是一个很好的选择，“给三孩提供免费教育，国家财政是完全能够承受的，因为小学和初中已经是义务教育了，仅仅需要提供幼儿园和高中的费用。 (红星新闻)	10:48_x000D_ 【全国政协委员甘华田：建议为第三孩提供从幼儿园到高中毕业的免费教育】财联社2月28日电，第十四届全国政协委员、四川大学华西医院教授甘华田表示，为更有效地鼓励生育，他将提交“关于进一步优化生育配套公共服务供给，提高生育意愿，优化人口结构的提案”，建议“为生育二孩、三孩的家庭发放教育专项补贴，为第三孩提供从幼儿园到高中毕业阶段的免费教育”。甘华田认为，目前，“二孩”“三孩”政策对我国总体生育率的影响不如预期。他说，不愿生的原因很多，教育问题是最重要的一个“拦路虎”，要解决这一问题，给三孩提供免费教育是一个很好的选择，“给三孩提供免费教育，国家财政是完全能够承受的，因为小学和初中已经是义务教育了，仅仅需要提供幼儿园和高中的费用。 (红星新闻)
20230113	【中信证券：美联储今年第一次议息会议加息25bps几成定局】财联社1月13日电，中信证券研报指出，自2020年6月以来美国整体CPI首次出现环比通缩，12月整体与核心CPI数据符合预期。分项来看，依旧是能源项以及核心商品项推动通胀下行，主要粘性构成仍为核心服务项。虽然在核心商品项CPI增速中枢大幅下降以及高基数的背景下通胀下行态势较为明晰，但未来美国通胀下行速度仍存在一定逆风。我们仍维持此前美联储于今年一季度停止加息、终点利率水平或在5%左右的判断，今年第一次议息会议加息25bps几成定局。	08:34_x000D_ 【中信证券：美联储今年第一次议息会议加息25bps几成定局】财联社1月13日电，中信证券研报指出，自2020年6月以来美国整体CPI首次出现环比通缩，12月整体与核心CPI数据符合预期。分项来看，依旧是能源项以及核心商品项推动通胀下行，主要粘性构成仍为核心服务项。虽然在核心商品项CPI增速中枢大幅下降以及高基数的背景下通胀下行态势较为明晰，但未来美国通胀下行速度仍存在一定逆风。我们仍维持此前美联储于今年一季度停止加息、终点利率水平或在5%左右的判断，今年第一次议息会议加息25bps几成定局。
20230308	【上海艾录：拟发行可转债募资不超过5亿元】财联社3月8日电，上海艾录公告，公司拟发行可转债募资不超过5亿元，用于工业用纸包装生产建设项目、补充流动资金。	16:36_x000D_ 【上海艾录：拟发行可转债募资不超过5亿元】财联社3月8日电，上海艾录公告，公司拟发行可转债募资不超过5亿元，用于工业用纸包装生产建设项目、补充流动资金。
20230105	【监管明确主板“红灯行业”不能申报？行业求证：并没有太大变化】财联社1月5日电，今日一则关于“证监会对核准制下的主板申报进行行业限制，明确‘红灯行业’（包括食品、防疫、白酒等）不能申报、‘黄灯行业’（包括家装、电器等）头部企业才可申报”的传闻引发行业关注，记者多方求证了解到，类似针对性指导一直存在，对主板确有“红灯行业”的相关限制，并非新情况，没有太大变化。（记者 刘超凤）	11:22_x000D_ 【监管明确主板“红灯行业”不能申报？行业求证：并没有太大变化】财联社1月5日电，今日一则关于“证监会对核准制下的主板申报进行行业限制，明确‘红灯行业’（包括食品、防疫、白酒等）不能申报、‘黄灯行业’（包括家装、电器等）头部企业才可申报”的传闻引发行业关注，记者多方求证了解到，类似针对性指导一直存在，对主板确有“红灯行业”的相关限制，并非新情况，没有太大变化。（记者 刘超凤）
20230323	【银泰黄金：子公司1.63亿元受让探矿权】财联社3月23日电，银泰黄金公告，3月23日，全资子公司黑河银泰与黑龙江省第七地质勘查院签署了《探矿权转让合同》，黑河银泰受让黑龙江省第七地质勘查院持有的黑龙江省逊克县东安岩金矿床5号矿体外围详查探矿权，探矿权成交价款为1.63亿元。	18:21_x000D_ 【银泰黄金：子公司1.63亿元受让探矿权】财联社3月23日电，银泰黄金公告，3月23日，全资子公司黑河银泰与黑龙江省第七地质勘查院签署了《探矿权转让合同》，黑河银泰受让黑龙江省第七地质勘查院持有的黑龙江省逊克县东安岩金矿床5号矿体外围详查探矿权，探矿权成交价款为1.63亿元。
20230411	14:17 _x000D_ [[+_+]]_x000D_ 专享 专享_x000D_ 【机会前瞻】政策支持力度加大，这一消费市场规模将达到5万亿元，这家公司携手华为发布了搭载鸿蒙系统的相关产品 解锁直达>>	14:17 _x000D_ [[+_+]]_x000D_ 专享 专享_x000D_ 【机会前瞻】政策支持力度加大，这一消费市场规模将达到5万亿元，这家公司携手华为发布了搭载鸿蒙系统的相关产品 解锁直达>>
20230427	【TCL科技：一季度亏损5.49亿元】财联社4月27日电，TCL科技披露一季报，一季度实现营业收入394.43亿元，同比下降2.77%；净利润为亏损5.49亿元，上年同期净利润13.53亿元。业绩下滑的主要原因为一季度半导体显示主要产品平均价格显著低于去年同期，行业利润率处于周期底部，半导体显示业务业绩同比大幅下降，但较去年四季度已环比企稳，随着主要产品价格自一季度末开始明显上涨，公司盈利能力将逐步改善；受项目退出及收益确认的期间影响，报告期内投资收益环比大幅减少。	23:09:01_x000D_ 【TCL科技：一季度亏损5.49亿元】财联社4月27日电，TCL科技披露一季报，一季度实现营业收入394.43亿元，同比下降2.77%；净利润为亏损5.49亿元，上年同期净利润13.53亿元。业绩下滑的主要原因为一季度半导体显示主要产品平均价格显著低于去年同期，行业利润率处于周期底部，半导体显示业务业绩同比大幅下降，但较去年四季度已环比企稳，随着主要产品价格自一季度末开始明显上涨，公司盈利能力将逐步改善；受项目退出及收益确认的期间影响，报告期内投资收益环比大幅减少。
20230213	【韵达快递：近期网传“2000多个网点关闭”、“公司要倒闭”等皆为不实内容】财联社2月12日电，韵达快递官微表示，网传2000多个网点关闭为不实内容。据最新统计，韵达一级网点比去年同期新增了100多个，揽派末端新增了1万多个，韵达网络快递服务从县级全面覆盖向乡镇地区不断延伸。至于“客服不受理”、“营收不盈利”、“公司要倒闭”等等，皆为不实之词。	21:27_x000D_ 【韵达快递：近期网传“2000多个网点关闭”、“公司要倒闭”等皆为不实内容】财联社2月12日电，韵达快递官微表示，网传2000多个网点关闭为不实内容。据最新统计，韵达一级网点比去年同期新增了100多个，揽派末端新增了1万多个，韵达网络快递服务从县级全面覆盖向乡镇地区不断延伸。至于“客服不受理”、“营收不盈利”、“公司要倒闭”等等，皆为不实之词。
20230214	【开普云：公司未与OpenAI开展正式合作】《科创板日报》14日讯，开普云发布澄清公告，公司未与OpenAI开展正式合作，ChatGPT的产品和服务未给公司带来业务收入。公司现阶段不具备提供ChatGPT相关产品和服务的条件和能力。公司认为整个AIGC领域的发展速度和阶段性效果需要冷静分析，避免短期盲目过热。	17:00_x000D_ 【开普云：公司未与OpenAI开展正式合作】《科创板日报》14日讯，开普云发布澄清公告，公司未与OpenAI开展正式合作，ChatGPT的产品和服务未给公司带来业务收入。公司现阶段不具备提供ChatGPT相关产品和服务的条件和能力。公司认为整个AIGC领域的发展速度和阶段性效果需要冷静分析，避免短期盲目过热。
20230712	【中国广核：2023年上半年结算市场化电量占比约55.5%】财联社7月12日电，中国广核在接受机构调研时表示，2023年上半年，公司结算市场化电量约587.9亿千瓦时，占比约为55.5%，与去年同期55%基本相当。公司市场化电量的平均含税电价约为0.4022元/千瓦时，比去年同期0.4009元/千瓦时增加了约1.3厘。分地区看，广东、福建平均市场电价略低于去年，广西、辽宁平均市场电价略高于去年。	15:15:59_x000D_ 【中国广核：2023年上半年结算市场化电量占比约55.5%】财联社7月12日电，中国广核在接受机构调研时表示，2023年上半年，公司结算市场化电量约587.9亿千瓦时，占比约为55.5%，与去年同期55%基本相当。公司市场化电量的平均含税电价约为0.4022元/千瓦时，比去年同期0.4009元/千瓦时增加了约1.3厘。分地区看，广东、福建平均市场电价略低于去年，广西、辽宁平均市场电价略高于去年。
20230714	【亚太股份：L3、L4级别的低速自动驾驶系统目前正在研发试验中】财联社7月14日电，亚太股份在互动平台表示，公司的ADAS量产产品目前主要聚焦于L1、L2高级辅助驾驶功能，L3、L4级别的低速自动驾驶系统目前正在研发试验中。公司参股公司苏州安智汽车零部件有限公司有研发4D毫米波雷达，目前正在研发试验中。目前公司量产的毫米波雷达产品有涉及24GHZ和77GHZ。	15:50:12_x000D_ 【亚太股份：L3、L4级别的低速自动驾驶系统目前正在研发试验中】财联社7月14日电，亚太股份在互动平台表示，公司的ADAS量产产品目前主要聚焦于L1、L2高级辅助驾驶功能，L3、L4级别的低速自动驾驶系统目前正在研发试验中。公司参股公司苏州安智汽车零部件有限公司有研发4D毫米波雷达，目前正在研发试验中。目前公司量产的毫米波雷达产品有涉及24GHZ和77GHZ。
20230109	【太阳能：2022年净利同比预增长12%-21%】财联社1月9日电，太阳能公告，预计2022年净利润13.25亿元-14.25亿元，同比增长12.21%-20.68%，业绩增长的原因一是公司装机规模增加，二是公司加强资金管理，降本增效成果显著，财务费用下降；三是制造板块销量增加，盈利能力增强。	18:00_x000D_ 【太阳能：2022年净利同比预增长12%-21%】财联社1月9日电，太阳能公告，预计2022年净利润13.25亿元-14.25亿元，同比增长12.21%-20.68%，业绩增长的原因一是公司装机规模增加，二是公司加强资金管理，降本增效成果显著，财务费用下降；三是制造板块销量增加，盈利能力增强。
20230221	【中科曙光：移动集采曙光存储份额第一】《科创板日报》21日讯，日前，中国移动公布2022年至2023年分布式块存储产品集中采购中标候选人名单，曙光XStor1000分布式块存储系统以两个标段第一的份额中标，中标金额为1亿元。本次项目采购，包括容量型和全闪型两个标段，采购规模约445套。这也是2020年以来，曙光存储连续第三年入围中移动集采。	11:28_x000D_ 【中科曙光：移动集采曙光存储份额第一】《科创板日报》21日讯，日前，中国移动公布2022年至2023年分布式块存储产品集中采购中标候选人名单，曙光XStor1000分布式块存储系统以两个标段第一的份额中标，中标金额为1亿元。本次项目采购，包括容量型和全闪型两个标段，采购规模约445套。这也是2020年以来，曙光存储连续第三年入围中移动集采。
20230510	【居然之家副总裁李杰：洞窝与天猫合作升级 6·18销售目标是同比增长20%以上】财联社5月10日电，在2022年度业绩交流会上，居然之家董事兼副总裁李杰表示，今年618期间，居然之家、天猫、洞窝将通过淘系矩阵全渠道推广、超级直播、品牌日落地等活动，全力打造6·18全行业销售标杆，销售目标同比增长20%以上。他还表示，接下来，猫窝首店将率先落地北京丽泽居然之家店，第二家门店将落地西安曲江居然之家店，未来还将发展到全国各大城市。	17:32:21_x000D_ 【居然之家副总裁李杰：洞窝与天猫合作升级 6·18销售目标是同比增长20%以上】财联社5月10日电，在2022年度业绩交流会上，居然之家董事兼副总裁李杰表示，今年618期间，居然之家、天猫、洞窝将通过淘系矩阵全渠道推广、超级直播、品牌日落地等活动，全力打造6·18全行业销售标杆，销售目标同比增长20%以上。他还表示，接下来，猫窝首店将率先落地北京丽泽居然之家店，第二家门店将落地西安曲江居然之家店，未来还将发展到全国各大城市。
20230518	【牧原股份：当前猪价属于正常状态】财联社5月18日电，今日，牧原股份董事长秦英林在2022年度股东大会上表示，当前母猪存量多、肉猪多、存肉多，现在的猪价属于正常状态。（财联社记者王平安 张晨静）	15:41:40_x000D_ 【牧原股份：当前猪价属于正常状态】财联社5月18日电，今日，牧原股份董事长秦英林在2022年度股东大会上表示，当前母猪存量多、肉猪多、存肉多，现在的猪价属于正常状态。（财联社记者王平安 张晨静）
20230828	20:32 _x000D_ [[+_+]]_x000D_ 专享 专享_x000D_ 【风口研报·公司】业内纷纷发布“提价函”开启旺季涨价模式，这家公司8万吨产能投产后订单依旧维持饱满，下半年盈利弹性即将充分释放；这家化工品公司主力产品近1个	20:32 _x000D_ [[+_+]]_x000D_ 专享 专享_x000D_ 【风口研报·公司】业内纷纷发布“提价函”开启旺季涨价模式，这家公司8万吨产能投产后订单依旧维持饱满，下半年盈利弹性即将充分释放；这家化工品公司主力产品近1个月普涨，新项目产能放量在即，有望迎α与β双击 解锁直达>>
20230908	【威士顿：目前正在进行大模型方面前期的技术准备】财联社9月8日电，威士顿接受机构调研时表示，公司目前正在进行大模型方面前期的技术准备，具体产品和市场布局有待进一步规划。另外，公司有应用于工业领域的智能工业机器人产品，目前在线检测机器人、拣杂机器人已经完成可试点客户的交付验证，且具备量产的能力，量产的时间和计划还需视市场情况确定。	13:00:25_x000D_ 【威士顿：目前正在进行大模型方面前期的技术准备】财联社9月8日电，威士顿接受机构调研时表示，公司目前正在进行大模型方面前期的技术准备，具体产品和市场布局有待进一步规划。另外，公司有应用于工业领域的智能工业机器人产品，目前在线检测机器人、拣杂机器人已经完成可试点客户的交付验证，且具备量产的能力，量产的时间和计划还需视市场情况确定。
20230404	【看空人工智能概念 但斌直呼：一旦被套 不知猴年马月解套】财联社4月4日电，ChatGPT大热，私募“大佬”但斌却开始提示风险。4月4日，东方港湾投资董事长但斌在其实名认证微博中表示：“我相信ChatGPT、人工智能代表未来，但其垄断性、开发使用成本只会让极少数公司拥有未来，这一波概念炒作一旦被套，不知道猴年马月解套！”对于微博认证为“北京神农投资总经理陈宇”提出的“但斌是本轮AI泡沫的反指，当但总翻多大举买入AI之时，就是AI泡沫破裂之日”的说法，但斌回复称：“我们现在已经持有全球最重要的AI企业，而且是ChatGPT的龙头企业，已经发生了。” (澎湃新闻)	22:36:59_x000D_ 【看空人工智能概念 但斌直呼：一旦被套 不知猴年马月解套】财联社4月4日电，ChatGPT大热，私募“大佬”但斌却开始提示风险。4月4日，东方港湾投资董事长但斌在其实名认证微博中表示：“我相信ChatGPT、人工智能代表未来，但其垄断性、开发使用成本只会让极少数公司拥有未来，这一波概念炒作一旦被套，不知道猴年马月解套！”对于微博认证为“北京神农投资总经理陈宇”提出的“但斌是本轮AI泡沫的反指，当但总翻多大举买入AI之时，就是AI泡沫破裂之日”的说法，但斌回复称：“我们现在已经持有全球最重要的AI企业，而且是ChatGPT的龙头企业，已经发生了。” (澎湃新闻)
20230801	07:00 _x000D_ [[+_+]]_x000D_ 专享 专享_x000D_ 【研选】需求改善和供给收缩齐来临，汽车、地产消费预期转好，助推钢铁行业上行；国资危化品仓储龙头，分析师看好公司未来智慧物流发展，布局大宗商品交割业务，有望享	07:00 _x000D_ [[+_+]]_x000D_ 专享 专享_x000D_ 【研选】需求改善和供给收缩齐来临，汽车、地产消费预期转好，助推钢铁行业上行；国资危化品仓储龙头，分析师看好公司未来智慧物流发展，布局大宗商品交割业务，有望享受更高收益 解锁直达>>
20230802	【美硕科技：现阶段汽车继电器在公司主营业务收入中占比较低】财联社8月2日电，美硕科技在互动平台表示，公司汽车继电器目前处于客户拓展阶段，现阶段汽车继电器在公司主营业务收入中占比较低，不会对公司经营产生重大影响，具体情况可参见公司最新披露的招股书。	08:48:42_x000D_ 【美硕科技：现阶段汽车继电器在公司主营业务收入中占比较低】财联社8月2日电，美硕科技在互动平台表示，公司汽车继电器目前处于客户拓展阶段，现阶段汽车继电器在公司主营业务收入中占比较低，不会对公司经营产生重大影响，具体情况可参见公司最新披露的招股书。
20230804	【三峡水利：永川区松溉、两江新区龙盛独立储能电站项目建成投产】财联社8月4日电，三峡水利公告，永川区松溉、两江新区龙盛独立储能电站项目建成投产。	16:36:47_x000D_ 【三峡水利：永川区松溉、两江新区龙盛独立储能电站项目建成投产】财联社8月4日电，三峡水利公告，永川区松溉、两江新区龙盛独立储能电站项目建成投产。
20230825	【恒生电子：上半年净利润4.46亿元 同比扭亏】财联社8月25日电，恒生电子公告，上半年净利润4.46亿元，上年同期净亏损9580万元。	19:31:40_x000D_ 【恒生电子：上半年净利润4.46亿元 同比扭亏】财联社8月25日电，恒生电子公告，上半年净利润4.46亿元，上年同期净亏损9580万元。
20230828	【部分交易软件提供商已通知券商 8月28日暂停量化T+0算法交易】财联社8月28日电，据记者了解，由于担心量化T+0策略遇到单边行情，并导致风险敞口，一些交易软件提供商已经通知券商，8月28日暂停了量化T+0算法交易。 (证券时报)	11:34:22_x000D_ 【部分交易软件提供商已通知券商 8月28日暂停量化T+0算法交易】财联社8月28日电，据记者了解，由于担心量化T+0策略遇到单边行情，并导致风险敞口，一些交易软件提供商已经通知券商，8月28日暂停了量化T+0算法交易。 (证券时报)
20230828	【部分交易软件提供商已通知券商 8月28日暂停量化T+0算法交易】财联社8月28日电，据记者了解，由于担心量化T+0策略遇到单边行情，并导致风险敞口，一些交易软件提供商已经通知券商，8月28日暂停了量化T+0算法交易。 (证券时报)	11:34:22_x000D_ 【部分交易软件提供商已通知券商 8月28日暂停量化T+0算法交易】财联社8月28日电，据记者了解，由于担心量化T+0策略遇到单边行情，并导致风险敞口，一些交易软件提供商已经通知券商，8月28日暂停了量化T+0算法交易。 (证券时报)
20230829	【龙津药业：控股股东、实控人提前终止减持计划】财联社8月29日电，龙津药业公告，根据中国证监会进一步规范股份减持行为的规定，并结合自身情况，公司控股股东群星投资、实控人樊献俄对减持计划予以终止。截至公告披露日，群星投资、樊献俄尚未减持公司股份。	16:51:40_x000D_ 【龙津药业：控股股东、实控人提前终止减持计划】财联社8月29日电，龙津药业公告，根据中国证监会进一步规范股份减持行为的规定，并结合自身情况，公司控股股东群星投资、实控人樊献俄对减持计划予以终止。截至公告披露日，群星投资、樊献俄尚未减持公司股份。
20230401	【蔚来3月交付新车10378台 同比增长3.9%】财联社4月1日电，蔚来公布2023年3月交付量，交付新车10378台，同比增长3.9%，其中高端智能电动SUV交付3203台，高端智能电动轿车交付7175台。2023年第一季度，蔚来共交付新车31041台，同比增长20.5%。截至目前，蔚来新车累计已交付320597台。	17:17:47_x000D_ 【蔚来3月交付新车10378台 同比增长3.9%】财联社4月1日电，蔚来公布2023年3月交付量，交付新车10378台，同比增长3.9%，其中高端智能电动SUV交付3203台，高端智能电动轿车交付7175台。2023年第一季度，蔚来共交付新车31041台，同比增长20.5%。截至目前，蔚来新车累计已交付320597台。
20230410	【美国情报机构被曝曾对韩国政府进行监听 韩国高官：韩方对美方的信任毋庸置疑】财联社4月10日电，近日，有关美国情报机构曾对韩国政府进行窃听、监听的报道盛传。韩国总统室一名高官10日在接受韩联社电话采访时称，报道内容是否属实尚未被查清，因此政府需与美方就有关问题进行沟通。另一名高官也表示，美方将与韩方共享有关报道内容的调查结果，韩方对美方的信任毋庸置疑。	11:12:26_x000D_ 【美国情报机构被曝曾对韩国政府进行监听 韩国高官：韩方对美方的信任毋庸置疑】财联社4月10日电，近日，有关美国情报机构曾对韩国政府进行窃听、监听的报道盛传。韩国总统室一名高官10日在接受韩联社电话采访时称，报道内容是否属实尚未被查清，因此政府需与美方就有关问题进行沟通。另一名高官也表示，美方将与韩方共享有关报道内容的调查结果，韩方对美方的信任毋庸置疑。
20230130	【润丰股份：拟定增募资不超25.47亿元】财联社1月30日电，润丰股份公告，公司拟向特定对象发行股票募资不超过25.47亿元，扣除发行费用后用于年产8000吨烯草酮项目、年产6万吨全新绿色连续化工艺2,4-D及其酯项目、年产1000吨二氯吡啶酸项目、年产1000吨丙炔氟草胺项目、全球运营数字化管理提升项目、补充流动资金。	19:48_x000D_ 【润丰股份：拟定增募资不超25.47亿元】财联社1月30日电，润丰股份公告，公司拟向特定对象发行股票募资不超过25.47亿元，扣除发行费用后用于年产8000吨烯草酮项目、年产6万吨全新绿色连续化工艺2,4-D及其酯项目、年产1000吨二氯吡啶酸项目、年产1000吨丙炔氟草胺项目、全球运营数字化管理提升项目、补充流动资金。
20230315	【牧原股份：公司当前经营正常 未发现有猪集中染病的情况】财联社3月15日电，对于近期猪病“抬头”的情况，今天上午记者以投资者身份致电牧原股份，对方回应表示，公司运用自动化系统饲养生猪，通过集中过滤系统、独立通风系统等过滤病菌，公司当前经营正常，未发现有猪集中染病的情况。 (第一财经)	16:47_x000D_ 【牧原股份：公司当前经营正常 未发现有猪集中染病的情况】财联社3月15日电，对于近期猪病“抬头”的情况，今天上午记者以投资者身份致电牧原股份，对方回应表示，公司运用自动化系统饲养生猪，通过集中过滤系统、独立通风系统等过滤病菌，公司当前经营正常，未发现有猪集中染病的情况。 (第一财经)
20230216	【同仁堂：同仁堂麦尔海以增资扩股方式引入战投】财联社2月16日电，同仁堂公告，公司控股子公司同仁堂科技、同仁堂国药与健之佳医药连锁集团股份有限公司（简称“健之佳”）签订增资协议，健之佳同意向同仁堂麦尔海增资3334.5万元，同仁堂科技、同仁堂国药作为同仁堂麦尔海现有股东，放弃此次增资的优先认购权。增资完成后，健之佳持有同仁堂麦尔海25%股权。同仁堂麦尔海将可借助健之佳的经营管理理念及销售渠道资源，深化开发与合作，提升产品竞争优势。	17:34_x000D_ 【同仁堂：同仁堂麦尔海以增资扩股方式引入战投】财联社2月16日电，同仁堂公告，公司控股子公司同仁堂科技、同仁堂国药与健之佳医药连锁集团股份有限公司（简称“健之佳”）签订增资协议，健之佳同意向同仁堂麦尔海增资3334.5万元，同仁堂科技、同仁堂国药作为同仁堂麦尔海现有股东，放弃此次增资的优先认购权。增资完成后，健之佳持有同仁堂麦尔海25%股权。同仁堂麦尔海将可借助健之佳的经营管理理念及销售渠道资源，深化开发与合作，提升产品竞争优势。
20230316	08:53 _x000D_ [[+_+]]_x000D_ 专享 专享_x000D_ 【电报解读】中国特色估值体系下国企价值有望重估，这家企业业务覆盖一带一路沿线多个国家 解锁直达>>	08:53 _x000D_ [[+_+]]_x000D_ 专享 专享_x000D_ 【电报解读】中国特色估值体系下国企价值有望重估，这家企业业务覆盖一带一路沿线多个国家 解锁直达>>
20230509	【我爱我家：今年会启动相寓业务独立分拆上市的准备工作】财联社5月9日电，房地产经纪企业我爱我家控股集团股份有限公司召开2022年年度业绩说明会。我爱我家管理层在业绩会上提到，相寓独立上市是公司一直明确的战略目标，公司今年会启动相寓业务独立分拆上市的准备工作。	18:09:26_x000D_ 【我爱我家：今年会启动相寓业务独立分拆上市的准备工作】财联社5月9日电，房地产经纪企业我爱我家控股集团股份有限公司召开2022年年度业绩说明会。我爱我家管理层在业绩会上提到，相寓独立上市是公司一直明确的战略目标，公司今年会启动相寓业务独立分拆上市的准备工作。
20230511	【5月15日起 四大国有银行协定存款和通知存款自律上限下调30BP】财联社5月11日电，据某国有大行消息，自下周一（15日）起银行协定存款及通知存款自律上限将下调，四大国有银行协定存款和通知存款自律上限下调幅度为30BP，其它金融机构降幅为50BP。 (第一财经)	11:53:23_x000D_ 【5月15日起 四大国有银行协定存款和通知存款自律上限下调30BP】财联社5月11日电，据某国有大行消息，自下周一（15日）起银行协定存款及通知存款自律上限将下调，四大国有银行协定存款和通知存款自律上限下调幅度为30BP，其它金融机构降幅为50BP。 (第一财经)
20230515	财联社5月15日电，永兴材料今日涨停，深股通买入2.64亿元并卖出5989万元，三机构合计买入1.68亿元。	16:31:28_x000D_ 财联社5月15日电，永兴材料今日涨停，深股通买入2.64亿元并卖出5989万元，三机构合计买入1.68亿元。
20230418	【中原内配：拟投资设立氢能项目合资公司】财联社4月18日电，中原内配公告，拟与上海重塑能源集团股份有限公司、北京氢璞创能科技有限公司共同投资设立氢能项目合资公司。	15:45:55_x000D_ 【中原内配：拟投资设立氢能项目合资公司】财联社4月18日电，中原内配公告，拟与上海重塑能源集团股份有限公司、北京氢璞创能科技有限公司共同投资设立氢能项目合资公司。
20230428	【新城控股：一季度净利同比增29.31%】财联社4月28日电，新城控股披露一季报，一季度实现营业收入162.52亿元，同比下降12.99%；净利润6.58亿元，同比增长29.31%；基本每股收益0.29元。	20:57:00_x000D_ 【新城控股：一季度净利同比增29.31%】财联社4月28日电，新城控股披露一季报，一季度实现营业收入162.52亿元，同比下降12.99%；净利润6.58亿元，同比增长29.31%；基本每股收益0.29元。
20230504	18:43 _x000D_ [[+_+]]_x000D_ 专享 专享_x000D_ 【机构龙虎榜解读】出版传媒+AIGC，出版业务稳居大众图书市场首位，即将启动AIGC数智出版框架方案，2022年对外输出版权逾400种，这家公司获大额净买入	18:43 _x000D_ [[+_+]]_x000D_ 专享 专享_x000D_ 【机构龙虎榜解读】出版传媒+AIGC，出版业务稳居大众图书市场首位，即将启动AIGC数智出版框架方案，2022年对外输出版权逾400种，这家公司获大额净买入 解锁直达>>
20230724	【世纪华通：证监会决定对公司立案】财联社7月24日电，世纪华通公告，公司收到证监会下发的《中国证券监督管理委员会立案告知书》。因公司涉嫌信息披露违法违规，根据《中华人民共和国证券法》《中华人民共和国行政处罚法》等法律法规，证监会决定对公司立案。	19:16:59_x000D_ 【世纪华通：证监会决定对公司立案】财联社7月24日电，世纪华通公告，公司收到证监会下发的《中国证券监督管理委员会立案告知书》。因公司涉嫌信息披露违法违规，根据《中华人民共和国证券法》《中华人民共和国行政处罚法》等法律法规，证监会决定对公司立案。
20230804	【京东发力基金销售端：APP上线基金购买入口】财联社8月4日电，记者获悉，京东APP上线了基金购买入口，上面基金种类齐全，采用了和其他互联网平台类似的货架式陈列设计。不仅如此，京东APP还嵌入了财富号和基金投顾等衍生业务，目前已有华夏基金、南方基金、嘉实基金等头部公募入驻。 (证券时报)	07:36:17_x000D_ 【京东发力基金销售端：APP上线基金购买入口】财联社8月4日电，记者获悉，京东APP上线了基金购买入口，上面基金种类齐全，采用了和其他互联网平台类似的货架式陈列设计。不仅如此，京东APP还嵌入了财富号和基金投顾等衍生业务，目前已有华夏基金、南方基金、嘉实基金等头部公募入驻。 (证券时报)
20230810	【主力资金监控：红塔证券净买入超4亿元】财联社8月10日电，财联社星矿数据显示，今日早盘主力资金净流入交通运输、石油石化、航运等板块，净流出计算机、医药、交运设备等板块，其中计算机板块净流出超20亿元。个股方面，红塔证券大涨，主力资金净买入4.69亿元，N蓝箭、招商南油、仁信新材获主力资金净流入居前；工业富联遭净卖出超3亿元，太平洋、中科曙光、贵州茅台主力资金净流出额居前。	10:56:10_x000D_ 【主力资金监控：红塔证券净买入超4亿元】财联社8月10日电，财联社星矿数据显示，今日早盘主力资金净流入交通运输、石油石化、航运等板块，净流出计算机、医药、交运设备等板块，其中计算机板块净流出超20亿元。个股方面，红塔证券大涨，主力资金净买入4.69亿元，N蓝箭、招商南油、仁信新材获主力资金净流入居前；工业富联遭净卖出超3亿元，太平洋、中科曙光、贵州茅台主力资金净流出额居前。
20230821	【中国电研：上半年净利润1.85亿元 同比增长10.94%】财联社8月21日电，中国电研公告，上半年实现营业收入约18.44亿元，同比增长11.94%；净利润约1.85亿元，同比增长10.94%；基本每股收益0.46元。	19:59:35_x000D_ 【中国电研：上半年净利润1.85亿元 同比增长10.94%】财联社8月21日电，中国电研公告，上半年实现营业收入约18.44亿元，同比增长11.94%；净利润约1.85亿元，同比增长10.94%；基本每股收益0.46元。
20230208	【物产金轮：参股公司正将chatGPT与其自主研发的中文概念语义建模技术相融合】财联社2月8日电，物产金轮在互动平台表示，参股公司灵伴科技在2020年4月底发布长音频AIGC平台“呱呱有声”，提供有声内容制作全流程AI生成与辅助能力，可实现从“文本”到“作品”的全流程一体化智能生产方式。在通用领域对话服务方面，灵伴科技正将chatGPT与其自主研发的中文概念语义建模技术相融合，在GPT大规模语言模型和RHLF人工反馈强化学习能力的基础上，构建可持续自主学习的通用领域智慧型对话机器人。灵伴科技为我公司参股公司，暂不会对本公司的业绩造成重大影响。	17:57_x000D_ 【物产金轮：参股公司正将chatGPT与其自主研发的中文概念语义建模技术相融合】财联社2月8日电，物产金轮在互动平台表示，参股公司灵伴科技在2020年4月底发布长音频AIGC平台“呱呱有声”，提供有声内容制作全流程AI生成与辅助能力，可实现从“文本”到“作品”的全流程一体化智能生产方式。在通用领域对话服务方面，灵伴科技正将chatGPT与其自主研发的中文概念语义建模技术相融合，在GPT大规模语言模型和RHLF人工反馈强化学习能力的基础上，构建可持续自主学习的通用领域智慧型对话机器人。灵伴科技为我公司参股公司，暂不会对本公司的业绩造成重大影响。
20230509	12:54 _x000D_ [[+_+]]_x000D_ 专享 专享_x000D_ 【机构调研】这家主流半导体核心供应商i线光刻胶已向中芯国际供货 解锁直达>>	12:54 _x000D_ [[+_+]]_x000D_ 专享 专享_x000D_ 【机构调研】这家主流半导体核心供应商i线光刻胶已向中芯国际供货 解锁直达>>
20230525	【杭州热电：目前无超超临界机组、虚拟电厂、储能业务】财联社5月25日电，杭州热电发布股票交易风险提示公告，公司生产经营未发生重大变化，目前公司无超超临界机组、虚拟电厂、储能业务。另外，2022年公司光伏业务占主营业务收入不到1%，对公司经营业绩影响有限。公司股票自2023年5月11日至2023年5月25日，已经9个交易日涨停，累计换手率为159.67%，市盈率显著高于同行业水平，目前公司股价与公司基本面严重偏离。	17:59:10_x000D_ 【杭州热电：目前无超超临界机组、虚拟电厂、储能业务】财联社5月25日电，杭州热电发布股票交易风险提示公告，公司生产经营未发生重大变化，目前公司无超超临界机组、虚拟电厂、储能业务。另外，2022年公司光伏业务占主营业务收入不到1%，对公司经营业绩影响有限。公司股票自2023年5月11日至2023年5月25日，已经9个交易日涨停，累计换手率为159.67%，市盈率显著高于同行业水平，目前公司股价与公司基本面严重偏离。
20230704	【华北制药：子公司注射用比阿培南获药品注册证书】财联社7月4日电，华北制药公告，全资子公司南方公司收到国家药品监督管理局核准签发的注射用比阿培南（0.3g）《药品注册证书》，注射用比阿培南为碳青霉烯类抗生素，通过抑制细菌细胞壁的合成而发挥抗菌作用，对革兰阳性、革兰阴性的需氧和厌氧菌有广谱抗菌活性。	18:43:40_x000D_ 【华北制药：子公司注射用比阿培南获药品注册证书】财联社7月4日电，华北制药公告，全资子公司南方公司收到国家药品监督管理局核准签发的注射用比阿培南（0.3g）《药品注册证书》，注射用比阿培南为碳青霉烯类抗生素，通过抑制细菌细胞壁的合成而发挥抗菌作用，对革兰阳性、革兰阴性的需氧和厌氧菌有广谱抗菌活性。
20230711	【甘肃能源：永昌河清滩300MW光伏发电项目并网发电】财联社7月11日电，甘肃能源公告，公司收到全资子公司报告，永昌河清滩项目于7月11日并网发电。该项目位于甘肃省金昌市永昌县河西堡镇河清滩，总装机容量300MW，占2022年末公司已发电权益装机容量的10.57%。	16:37:39_x000D_ 【甘肃能源：永昌河清滩300MW光伏发电项目并网发电】财联社7月11日电，甘肃能源公告，公司收到全资子公司报告，永昌河清滩项目于7月11日并网发电。该项目位于甘肃省金昌市永昌县河西堡镇河清滩，总装机容量300MW，占2022年末公司已发电权益装机容量的10.57%。
20230220	【小商品城：接下来将扩大跨境人民币业务规模 积极申请跨境外汇资质】财联社2月20日电，由小商品城打造的支付平台——YiwuPay义支付今日正式发布，这标志着全球最大的小商品集散中心拥有了自己的全球支付渠道。小商品城相关负责人表示，接下来将重点做好三篇文章：一是做好跨境支付的文章，持续扩大跨境人民币业务规模，积极申请跨境外汇资质，将跨境能力遍布全球，成为专业市场全球跨境贸易第一选择；二是持续做好国内支付的文章，进一步强化数智金融赋能市场内贸的能力和水平；三是做好跨境贸易数字人民币支付的文章，打造数字人民币境内境外、线上线下全场景应用标杆。 (第一财经)	12:55_x000D_ 【小商品城：接下来将扩大跨境人民币业务规模 积极申请跨境外汇资质】财联社2月20日电，由小商品城打造的支付平台——YiwuPay义支付今日正式发布，这标志着全球最大的小商品集散中心拥有了自己的全球支付渠道。小商品城相关负责人表示，接下来将重点做好三篇文章：一是做好跨境支付的文章，持续扩大跨境人民币业务规模，积极申请跨境外汇资质，将跨境能力遍布全球，成为专业市场全球跨境贸易第一选择；二是持续做好国内支付的文章，进一步强化数智金融赋能市场内贸的能力和水平；三是做好跨境贸易数字人民币支付的文章，打造数字人民币境内境外、线上线下全场景应用标杆。 (第一财经)
20230809	【甘李药业：正积极开展适应症为2型糖尿病、肥胖及超重体重管理的Ⅱ期临床试验】财联社8月9日电，甘李药业在互动平台表示，公司在研的1类创新型治疗用生物制品GZR18是一种预期每一周注射一次长效胰高血糖素样肽-1（GLP-1）受体激动剂类药物，已获批临床的适应症为成人2型糖尿病、肥胖/超重体重管理。现阶段公司正在积极开展适应症为2型糖尿病（T2DM）、肥胖及超重体重管理的Ⅱ期临床试验。该产品是中国首款与司美格鲁肽头对头评估药物有效性的GLP-1受体激动剂，公司将疗效设置为主要终点。下一阶段将持续推动研发成果尽快落地，以增加新的盈利点。	18:23:39_x000D_ 【甘李药业：正积极开展适应症为2型糖尿病、肥胖及超重体重管理的Ⅱ期临床试验】财联社8月9日电，甘李药业在互动平台表示，公司在研的1类创新型治疗用生物制品GZR18是一种预期每一周注射一次长效胰高血糖素样肽-1（GLP-1）受体激动剂类药物，已获批临床的适应症为成人2型糖尿病、肥胖/超重体重管理。现阶段公司正在积极开展适应症为2型糖尿病（T2DM）、肥胖及超重体重管理的Ⅱ期临床试验。该产品是中国首款与司美格鲁肽头对头评估药物有效性的GLP-1受体激动剂，公司将疗效设置为主要终点。下一阶段将持续推动研发成果尽快落地，以增加新的盈利点。
20230728	00:03 _x000D_ [[+_+]]_x000D_ 专享 专享_x000D_ 【电报解读】落实好降低首付比例和利率、“认房不用认贷”等政策措施，机构持续看好投资强度高、布局区域优的强信用房企，这家公司最终控制人为中央汇金公司 解锁直达	00:03 _x000D_ [[+_+]]_x000D_ 专享 专享_x000D_ 【电报解读】落实好降低首付比例和利率、“认房不用认贷”等政策措施，机构持续看好投资强度高、布局区域优的强信用房企，这家公司最终控制人为中央汇金公司 解锁直达>>
20230817	【福光股份：间接控股股东拟1000万元-5000万元增持公司股份】财联社8月17日电，福光股份公告，公司间接控股股东福光科技集团拟自2023年8月18日起6个月内，通过集中竞价方式增持公司股份，增持金额为不低于1000万元且不超过5000万元。公司实控人、董事长兼总经理何文波持有福光科技集团100%股份。	19:58:48_x000D_ 【福光股份：间接控股股东拟1000万元-5000万元增持公司股份】财联社8月17日电，福光股份公告，公司间接控股股东福光科技集团拟自2023年8月18日起6个月内，通过集中竞价方式增持公司股份，增持金额为不低于1000万元且不超过5000万元。公司实控人、董事长兼总经理何文波持有福光科技集团100%股份。
20230428	【午间公告】财联社4月28日电，多家公司发布午间公告，具体如下：①万里石：湖南省监察委员会已解除对胡精沛的留置措施。目前胡精沛能够正常履行公司董事长、法定代表人职责。②华东医药：由全资子公司中美华东和美国 Provention Bio, Inc 申报的PRV-3279 Ⅱa临床试验申请获得批准，该药品适应症为系统性红斑狼疮。③开能健康：向不特定对象发行可转债申请获深交所创业板上市委员会审核通过。④华中数控：向特定对象发行股票申请获深交所受理。⑤盛弘股份：向不特定对象发行可转债申请获深交所受理。	12:22:16_x000D_ 【午间公告】财联社4月28日电，多家公司发布午间公告，具体如下：_x000D_ _x000D_ ①万里石：湖南省监察委员会已解除对胡精沛的留置措施。目前胡精沛能够正常履行公司董事长、法定代表人职责。_x000D_ _x000D_ ②华东医药：由全资子公司中美华东和美国 Provention Bio, Inc 申报的PRV-3279 Ⅱa临床试验申请获得批准，该药品适应症为系统性红斑狼疮。_x000D_ _x000D_ ③开能健康：向不特定对象发行可转债申请获深交所创业板上市委员会审核通过。_x000D_ _x000D_ ④华中数控：向特定对象发行股票申请获深交所受理。_x000D_ _x000D_ ⑤盛弘股份：向不特定对象发行可转债申请获深交所受理。
20230301	【午间公告：新亚制程股东新力达集团拟协议转让公司5%股份】财联社3月1日电，多家公司发布午间公告，具体如下：①新亚制程：股东新力达集团与格律诗9号基金签署《股份转让协议》，拟将其持有的5%公司股份以7.09元/股的价格转让给格律诗9号基金，转让价款总额为1.8亿元。②安联锐视：粤财投资计划以集中竞价交易方式减持不超2%公司股份；汇文添富及其一致行动人齐梁计划减持不超过4.6%公司股份。③旺能环境：全资子公司旺能城矿与安徽巡鹰签署了《合作备忘录》。双方将深化动力电池回收产业协同合作。	12:05_x000D_ 【午间公告：新亚制程股东新力达集团拟协议转让公司5%股份】财联社3月1日电，多家公司发布午间公告，具体如下：_x000D_ _x000D_ ①新亚制程：股东新力达集团与格律诗9号基金签署《股份转让协议》，拟将其持有的5%公司股份以7.09元/股的价格转让给格律诗9号基金，转让价款总额为1.8亿元。_x000D_ _x000D_ ②安联锐视：粤财投资计划以集中竞价交易方式减持不超2%公司股份；汇文添富及其一致行动人齐梁计划减持不超过4.6%公司股份。_x000D_ _x000D_ ③旺能环境：全资子公司旺能城矿与安徽巡鹰签署了《合作备忘录》。双方将深化动力电池回收产业协同合作。
20230809	【证券日报头版：推动注册制改革走深走实是激活资本市场融资端的关键】财联社8月9日电，证券日报头版文章指出，随着全面注册制落地实施，资本市场的融资端改革落下“关键一子”。在注册制改革带动下，资本市场基础制度更趋完善，投融资便利性提高，市场活力和韧性明显增强，多层次市场体系不断完善。未来，资本市场改革将持续推进，步履不停。证监会2023年系统年中工作座谈会提出，“推动注册制改革走深走实”。可以预见，注册制各项配套制度将在实践中不断优化完善，资本市场服务实体经济、助力科技创新的能力将进一步提升。	07:25:23_x000D_ 【证券日报头版：推动注册制改革走深走实是激活资本市场融资端的关键】财联社8月9日电，证券日报头版文章指出，随着全面注册制落地实施，资本市场的融资端改革落下“关键一子”。在注册制改革带动下，资本市场基础制度更趋完善，投融资便利性提高，市场活力和韧性明显增强，多层次市场体系不断完善。未来，资本市场改革将持续推进，步履不停。证监会2023年系统年中工作座谈会提出，“推动注册制改革走深走实”。可以预见，注册制各项配套制度将在实践中不断优化完善，资本市场服务实体经济、助力科技创新的能力将进一步提升。
20230407	【龙虎榜|创维数字今日涨停3家机构净买入1.4亿元】财联社4月7日电，创维数字今日涨停，成交额22.37亿元，盘后数据显示，3家机构净买入1.4亿元，4家机构净卖出1.43亿元。	16:36:35_x000D_ 【龙虎榜|创维数字今日涨停3家机构净买入1.4亿元】财联社4月7日电，创维数字今日涨停，成交额22.37亿元，盘后数据显示，3家机构净买入1.4亿元，4家机构净卖出1.43亿元。
20230427	【兆易创新：一季度净利润同比下降78.13%】财联社4月27日电，兆易创新披露一季报，一季度归母净利润1.5亿元，同比下降78.13%，芯片产品市场需求下降。	18:20:45_x000D_ 【兆易创新：一季度净利润同比下降78.13%】财联社4月27日电，兆易创新披露一季报，一季度归母净利润1.5亿元，同比下降78.13%，芯片产品市场需求下降。
20230428	【海信视像：一季度净利同比增长107.9%】财联社4月28日电，海信视像公告，一季度实现营业收入114.83亿元，同比增长12.75%；净利润6.21亿元，同比增长107.9%；基本每股收益0.48元。报告期净利增长主要系公司产品结构升级、出口规模增加等影响。	20:03:08_x000D_ 【海信视像：一季度净利同比增长107.9%】财联社4月28日电，海信视像公告，一季度实现营业收入114.83亿元，同比增长12.75%；净利润6.21亿元，同比增长107.9%；基本每股收益0.48元。报告期净利增长主要系公司产品结构升级、出口规模增加等影响。
20230117	【王小青将出任招商银行副行长 仍兼任招商基金董事长】财联社1月17日电，招商银行公告称，董事会审议通过《关于聘任王小青先生为招商银行副行长的议案》，同意聘任王小青为招商银行副行长。公开资料显示，王小青自2020年3月加入招商基金，2020年5月12日任职招商基金总经理，2021年10月起任招商银行行长助理，兼任招商基金董事长、招商信诺人寿保险董事长、招商信诺资管董事长。在他任职期间，招商基金资管业务总规模从2020年6月底的9587.61亿元上升至2022年三季度末的1.51万亿元。其中非货币公募基金管理规模行业排名从2020年6月底的第10名跃升至2022年9月底的第5名。（记者 周晓雅）	18:17_x000D_ 【王小青将出任招商银行副行长 仍兼任招商基金董事长】财联社1月17日电，招商银行公告称，董事会审议通过《关于聘任王小青先生为招商银行副行长的议案》，同意聘任王小青为招商银行副行长。公开资料显示，王小青自2020年3月加入招商基金，2020年5月12日任职招商基金总经理，2021年10月起任招商银行行长助理，兼任招商基金董事长、招商信诺人寿保险董事长、招商信诺资管董事长。在他任职期间，招商基金资管业务总规模从2020年6月底的9587.61亿元上升至2022年三季度末的1.51万亿元。其中非货币公募基金管理规模行业排名从2020年6月底的第10名跃升至2022年9月底的第5名。（记者 周晓雅）
20230403	【上海医药：盐酸西那卡塞原料药上市申请获得批准】财联社4月3日电，上海医药公告，盐酸西那卡塞原料药上市申请获得批准。	17:15:13_x000D_ 【上海医药：盐酸西那卡塞原料药上市申请获得批准】财联社4月3日电，上海医药公告，盐酸西那卡塞原料药上市申请获得批准。
20230411	【美亚柏科：会适时布局大模型在猎鹰浏览器上的应用】财联社4月11日电，美亚柏科在互动平台表示，公司会根据市场需求情况，适时布局大模型在猎鹰浏览器上的应用，实现智能化服务及体验的提升。公司当前在AI大模型领域主要以自主研发为主，也将保持与大型互联网公司合作的开放态度。未来公司在这方面的研发模式，会本着合作共赢，高质量发展的原则，并结合技术发展及业务需要而调整。	22:15:16_x000D_ 【美亚柏科：会适时布局大模型在猎鹰浏览器上的应用】财联社4月11日电，美亚柏科在互动平台表示，公司会根据市场需求情况，适时布局大模型在猎鹰浏览器上的应用，实现智能化服务及体验的提升。公司当前在AI大模型领域主要以自主研发为主，也将保持与大型互联网公司合作的开放态度。未来公司在这方面的研发模式，会本着合作共赢，高质量发展的原则，并结合技术发展及业务需要而调整。
20230707	【汇宇制药：普乐沙福注射液获得德国上市许可】财联社7月7日电，汇宇制药公告，全资子公司Seacross Pharma (Europe) Ltd.于近日收到德国药监局核准签发的关于公司产品普乐沙福注射液的上市许可。	17:21:17_x000D_ 【汇宇制药：普乐沙福注射液获得德国上市许可】财联社7月7日电，汇宇制药公告，全资子公司Seacross Pharma (Europe) Ltd.于近日收到德国药监局核准签发的关于公司产品普乐沙福注射液的上市许可。
20230723	【弘信电子：拟投建年产10万台AI算力服务器智能制造基地】财联社7月23日电，弘信电子公告，公司与甘肃天水经济技术开发区管理委员会达成战略共识，经友好协商，双方拟共同签署《高性能AI算力服务器智造项目合作协议》。公司拟投建高性能AI算力服务器智造项目，预计总投资10亿元，拟建设年产10万台AI算力服务器智能制造基地。	16:19:37_x000D_ 【弘信电子：拟投建年产10万台AI算力服务器智能制造基地】财联社7月23日电，弘信电子公告，公司与甘肃天水经济技术开发区管理委员会达成战略共识，经友好协商，双方拟共同签署《高性能AI算力服务器智造项目合作协议》。公司拟投建高性能AI算力服务器智造项目，预计总投资10亿元，拟建设年产10万台AI算力服务器智能制造基地。
20230605	2023.06.04 星期日 21:40 _x000D_ [[+_+]]_x000D_ 专享 专享_x000D_ 【风口研报·洞察】悲观情绪开始回摆，反弹中哪些方向胜率高、赔率足？支付板块估值低+高增长，行业迎来“流水规模提升x收单费率提升	2023.06.04 星期日 21:40 _x000D_ [[+_+]]_x000D_ 专享 专享_x000D_ 【风口研报·洞察】悲观情绪开始回摆，反弹中哪些方向胜率高、赔率足？支付板块估值低+高增长，行业迎来“流水规模提升x收单费率提升x毛利率提升”三连击，利润弹性下半年有望进一步释放 解锁直达>>
20230628	【三大指数均跌逾1% 近50股跌超9%】财联社6月28日电，指数走弱，沪指下挫跌逾1%，深成指跌1.67%，创业板指跌1.41%。泛AI、游戏、数据要素、光模块、传媒等方向跌幅居前，两市下跌个股近4500只，近50股跌超9%。	10:11:58_x000D_ 【三大指数均跌逾1% 近50股跌超9%】财联社6月28日电，指数走弱，沪指下挫跌逾1%，深成指跌1.67%，创业板指跌1.41%。泛AI、游戏、数据要素、光模块、传媒等方向跌幅居前，两市下跌个股近4500只，近50股跌超9%。
20230506	【巴菲特：不记得我们有做过任何情绪化的投资】财联社5月6日电，伯克希尔哈撒韦公司CEO沃伦·巴菲特表示，我们一直在做平衡的投资计划和决定。我不记得有做过任何情绪化的投资。查理是非常理智的。	22:53:32_x000D_ 【巴菲特：不记得我们有做过任何情绪化的投资】财联社5月6日电，伯克希尔哈撒韦公司CEO沃伦·巴菲特表示，我们一直在做平衡的投资计划和决定。我不记得有做过任何情绪化的投资。查理是非常理智的。
20230529	【国新文化：与科大讯飞在“三个课堂”相关产品和项目上开展合作】财联社5月29日电，国新文化在互动平台表示，公司与科大讯飞已在“三个课堂”相关产品和项目上开展合作。子公司奥威亚过去三年已陆续完成了核心产品的芯片国产化替代研发工作，并发布了多款AI主机、AI摄像机，实现了AI算力内置。	17:00:47_x000D_ 【国新文化：与科大讯飞在“三个课堂”相关产品和项目上开展合作】财联社5月29日电，国新文化在互动平台表示，公司与科大讯飞已在“三个课堂”相关产品和项目上开展合作。子公司奥威亚过去三年已陆续完成了核心产品的芯片国产化替代研发工作，并发布了多款AI主机、AI摄像机，实现了AI算力内置。
20230307	【中泰证券：银行股核心逻辑是宏观经济 坚持修复逻辑和确定性增长逻辑两条主线】财联社3月7日电，中泰证券研报表示，银行股的核心逻辑是宏观经济，之前要看政策预期，如今政策预期落地后，下阶段就要看经济的持续性。近期超预期数据会支撑银行股近期行情，未来银行股的持续性要看经济的持续性，因此我们仍然坚持两条主线，修复逻辑和确定性增长逻辑。第一条选股主线是修复逻辑：地产回暖+消费复苏，看好招行、宁波、平安、邮储。第二条选股主线是确定性增长逻辑：收入端增长确定性最强的仍是优质区域城商行板块，看好宁波、苏州、江苏、南京、成都。	07:30_x000D_ 【中泰证券：银行股核心逻辑是宏观经济 坚持修复逻辑和确定性增长逻辑两条主线】财联社3月7日电，中泰证券研报表示，银行股的核心逻辑是宏观经济，之前要看政策预期，如今政策预期落地后，下阶段就要看经济的持续性。近期超预期数据会支撑银行股近期行情，未来银行股的持续性要看经济的持续性，因此我们仍然坚持两条主线，修复逻辑和确定性增长逻辑。第一条选股主线是修复逻辑：地产回暖+消费复苏，看好招行、宁波、平安、邮储。第二条选股主线是确定性增长逻辑：收入端增长确定性最强的仍是优质区域城商行板块，看好宁波、苏州、江苏、南京、成都。
20230104	21:44 _x000D_ [[+_+]]_x000D_ 专享 专享_x000D_ 【风口研报·洞察】让机构告诉你，2023年需要谨慎避免踩坑的“一致预期”有哪些？ 解锁直达>>	21:44 _x000D_ [[+_+]]_x000D_ 专享 专享_x000D_ 【风口研报·洞察】让机构告诉你，2023年需要谨慎避免踩坑的“一致预期”有哪些？ 解锁直达>>
20230209	【科创信息：公司具有武器装备科研生产单位二级保密资格证书】财联社2月9日电，科创信息在互动平台表示，公司作为数字时代的信息化综合服务提供商，致力于打造以数字政府和智慧企业业务为核心的数字生态体系。公司具有武器装备科研生产单位二级保密资格证书，但目前涉及的军工业务收入较小，敬请投资者注意投资风险。	10:47_x000D_ 【科创信息：公司具有武器装备科研生产单位二级保密资格证书】财联社2月9日电，科创信息在互动平台表示，公司作为数字时代的信息化综合服务提供商，致力于打造以数字政府和智慧企业业务为核心的数字生态体系。公司具有武器装备科研生产单位二级保密资格证书，但目前涉及的军工业务收入较小，敬请投资者注意投资风险。
20230524	【双林股份：暂无生产减压器相关产品】财联社5月24日电，双林股份在互动平台上称，目前公司暂无生产减压器相关产品，公司已有电机和减速器二合一电桥产品，同时公司正在积极布局电机、减速器、电机控制器三合一的产品，目前已经完成A/B样机的制作和测试，并在客户端完成匹配，预计2023年可以推向市场。	15:19:48_x000D_ 【双林股份：暂无生产减压器相关产品】财联社5月24日电，双林股份在互动平台上称，目前公司暂无生产减压器相关产品，公司已有电机和减速器二合一电桥产品，同时公司正在积极布局电机、减速器、电机控制器三合一的产品，目前已经完成A/B样机的制作和测试，并在客户端完成匹配，预计2023年可以推向市场。
20230528	【潍柴动力：纯电动、混动及燃料电池相关产品已经实现量产】财联社5月28日电，潍柴动力在互动平台表示，新能源方向，公司扎实推动多种技术路线技术攻关及商业化落地，纯电动、混动及燃料电池相关产品已经实现量产。	18:48:17_x000D_ 【潍柴动力：纯电动、混动及燃料电池相关产品已经实现量产】财联社5月28日电，潍柴动力在互动平台表示，新能源方向，公司扎实推动多种技术路线技术攻关及商业化落地，纯电动、混动及燃料电池相关产品已经实现量产。
20230221	2023.02.20 星期一 22:57 _x000D_ [[+_+]]_x000D_ 专享 专享_x000D_ 【电报解读】万倍差距！ChatGPT浪潮下算力缺口巨大，这一新技术突破瓶颈拥有更大算力、更高能效，这家企业募投项目包括相关产品	2023.02.20 星期一 22:57 _x000D_ [[+_+]]_x000D_ 专享 专享_x000D_ 【电报解读】万倍差距！ChatGPT浪潮下算力缺口巨大，这一新技术突破瓶颈拥有更大算力、更高能效，这家企业募投项目包括相关产品研发方向 解锁直达>>
20230315	【瑞斯康达：公司针对6G技术的研究处于规划预研阶段 已经有一定技术储备和人才储备】财联社3月15日电，瑞斯康达在互动平台表示，公司针对6G技术的研究处于规划预研阶段，已经有一定技术储备和人才储备，6G的商用到发展有待技术进一步成熟，离正式商用还有较长时间。	17:25_x000D_ 【瑞斯康达：公司针对6G技术的研究处于规划预研阶段 已经有一定技术储备和人才储备】财联社3月15日电，瑞斯康达在互动平台表示，公司针对6G技术的研究处于规划预研阶段，已经有一定技术储备和人才储备，6G的商用到发展有待技术进一步成熟，离正式商用还有较长时间。
20230509	【卓越新能：公司生产基地未受到暴雨灾害影响】财联社5月9日电，卓越新能在互动平台表示，公司生产基地未受到暴雨灾害影响，公司生产经营一切正常。	14:35:12_x000D_ 【卓越新能：公司生产基地未受到暴雨灾害影响】财联社5月9日电，卓越新能在互动平台表示，公司生产基地未受到暴雨灾害影响，公司生产经营一切正常。
20230511	【捷成股份：推动AIGC相关技术在短视频创作等领域的深度应用】财联社5月11日电，捷成股份在互动平台表示，公司将在目前影视版权发行、运营业务的基础上，结合AIGC领域的相关技术创新，加大在AIGC领域的投入和应用力度，推动AIGC相关技术在内容创意、影视剧内容制作、短视频创作等领域的深度应用，进而提升公司影视剧拍摄及相关影视内容二次创作效率，提升公司版权的多渠道、多模态运营价值。	20:06:44_x000D_ 【捷成股份：推动AIGC相关技术在短视频创作等领域的深度应用】财联社5月11日电，捷成股份在互动平台表示，公司将在目前影视版权发行、运营业务的基础上，结合AIGC领域的相关技术创新，加大在AIGC领域的投入和应用力度，推动AIGC相关技术在内容创意、影视剧内容制作、短视频创作等领域的深度应用，进而提升公司影视剧拍摄及相关影视内容二次创作效率，提升公司版权的多渠道、多模态运营价值。
20230730	【高温致电力系统承压 美国最大电网运营商发布一级能源紧急警报】财联社7月30日电，高温笼罩美国多地， 除了已被高温“炙烤”多日的美国西南部地区之外，包括纽约和费城在内的东海岸城市这两天也变得酷热难耐。美国的电力系统也承受了巨大压力。美国最大的电网运营商日前已向13个州和华盛顿特区发布一级能源紧急警报，呼吁民众节约使用空调等大功率电器，并将空调设置为恒温25℃或26℃，以避免造成电网负载过大而导致停电。	21:42:04_x000D_ 【高温致电力系统承压 美国最大电网运营商发布一级能源紧急警报】财联社7月30日电，高温笼罩美国多地， 除了已被高温“炙烤”多日的美国西南部地区之外，包括纽约和费城在内的东海岸城市这两天也变得酷热难耐。美国的电力系统也承受了巨大压力。美国最大的电网运营商日前已向13个州和华盛顿特区发布一级能源紧急警报，呼吁民众节约使用空调等大功率电器，并将空调设置为恒温25℃或26℃，以避免造成电网负载过大而导致停电。
20230803	2023.08.02 星期三 23:10 _x000D_ [[+_+]]_x000D_ 专享 专享_x000D_ 【电报解读】芯片+Chiplet+AI，二季度净利同比增超7倍，在手订单超21亿元，这家公司IP授权业务市占率中国大陆第一 解	2023.08.02 星期三 23:10 _x000D_ [[+_+]]_x000D_ 专享 专享_x000D_ 【电报解读】芯片+Chiplet+AI，二季度净利同比增超7倍，在手订单超21亿元，这家公司IP授权业务市占率中国大陆第一 解锁直达>>
20230820	【中国酒业协会理事长宋书玉：白酒以香型划分的时代已经结束 个性化表达的时代正在到来】财联社8月20日电，中国酒业协会理事长宋书玉表示，中国白酒以香型划分的时代已经结束了，一个“百花齐放、百家争鸣”，个性化的产区表达、酒庄表达、风味表达、文化表达时代正在到来。	17:12:20_x000D_ 【中国酒业协会理事长宋书玉：白酒以香型划分的时代已经结束 个性化表达的时代正在到来】财联社8月20日电，中国酒业协会理事长宋书玉表示，中国白酒以香型划分的时代已经结束了，一个“百花齐放、百家争鸣”，个性化的产区表达、酒庄表达、风味表达、文化表达时代正在到来。
20230209	【独家|字节AI实验室正开展类似ChatGPT和AIGC相关研发 未来或为PICO提供支持】《科创板日报》9日讯，《科创板日报》记者独家获悉，字节跳动的人工智能实验室（AI Lab)有开展类似ChatGPT和AIGC的相关研发，未来或为PICO提供技术支持。据知情人士透露，PICO目前的业务发展不及预期，为此字节AI Lab将在VR内容生成上开展更多探索。据悉，字节AI Lab成立于2016年，研究领域主要涉及自然语言处理、数据挖掘、机器学习、语音与音频等。（记者 黄心怡）	14:30_x000D_ 【独家|字节AI实验室正开展类似ChatGPT和AIGC相关研发 未来或为PICO提供支持】《科创板日报》9日讯，《科创板日报》记者独家获悉，字节跳动的人工智能实验室（AI Lab)有开展类似ChatGPT和AIGC的相关研发，未来或为PICO提供技术支持。据知情人士透露，PICO目前的业务发展不及预期，为此字节AI Lab将在VR内容生成上开展更多探索。据悉，字节AI Lab成立于2016年，研究领域主要涉及自然语言处理、数据挖掘、机器学习、语音与音频等。（记者 黄心怡）
20230630	【胡锡进：经过这一周 更渴望国家刺激经济政策的出台】财联社6月30日电，胡锡进炒股第四天心得发布，下周我会继续增持股票，逐渐把仓内20万元的大部分资金都用上。我大的想法是在这个股市的低点进入，选几只基金和几只长期表现比较好的股票，然后长期持有，少做短线的买进卖出。进入股市以后，我发现自己的心态有微妙变化，对经济更加关注了，更渴望国家刺激经济政策的出台，对国际形势的关注也有了一个股市的视角。	17:09:39_x000D_ 【胡锡进：经过这一周 更渴望国家刺激经济政策的出台】财联社6月30日电，胡锡进炒股第四天心得发布，下周我会继续增持股票，逐渐把仓内20万元的大部分资金都用上。我大的想法是在这个股市的低点进入，选几只基金和几只长期表现比较好的股票，然后长期持有，少做短线的买进卖出。进入股市以后，我发现自己的心态有微妙变化，对经济更加关注了，更渴望国家刺激经济政策的出台，对国际形势的关注也有了一个股市的视角。
20230216	【宁波华翔：拟获实控人注入宁波峰梅视讯100%股权】财联社2月16日电，宁波华翔公告，为增强公司汽车电子方面的综合能力，实控人周晓峰提议将宁波峰梅视讯100%股权注入公司。此次交易将以峰梅视讯截止2022年12月31日账面净资产值为交易价格，计1324万元。此次交易完成后，峰梅视讯将成为宁波华翔的全资子公司。本次交易完成后，丰富了公司在汽车零部件产品种类。同时CMS业务的加入，进一步增强了公司在以“智能座舱”为主要方向的电子类综合能力。	16:59_x000D_ 【宁波华翔：拟获实控人注入宁波峰梅视讯100%股权】财联社2月16日电，宁波华翔公告，为增强公司汽车电子方面的综合能力，实控人周晓峰提议将宁波峰梅视讯100%股权注入公司。此次交易将以峰梅视讯截止2022年12月31日账面净资产值为交易价格，计1324万元。此次交易完成后，峰梅视讯将成为宁波华翔的全资子公司。本次交易完成后，丰富了公司在汽车零部件产品种类。同时CMS业务的加入，进一步增强了公司在以“智能座舱”为主要方向的电子类综合能力。
20230628	17:35 _x000D_ [[+_+]]_x000D_ 专享 专享_x000D_ 【风口研报·公司】联手ABB发力机器人领域，这家公司“机器人配套零件+汽车螺旋弹簧+稳定杆”三大增量较为确定；另一家公司布局汽车传感器、ADAS和空气悬挂前	17:35 _x000D_ [[+_+]]_x000D_ 专享 专享_x000D_ 【风口研报·公司】联手ABB发力机器人领域，这家公司“机器人配套零件+汽车螺旋弹簧+稳定杆”三大增量较为确定；另一家公司布局汽车传感器、ADAS和空气悬挂前瞻业务，今年业绩有望增9成 解锁直达>>
20230707	18:27 _x000D_ [[+_+]]_x000D_ 专享 专享_x000D_ 【机构龙虎榜解读】存储芯片+无人驾驶，自研芯片用于AI、数据中心等行业，触控芯片逐步导入后装车机领域，参股企业光芯片处于研发阶段，两家机构净买入这家公司 解	18:27 _x000D_ [[+_+]]_x000D_ 专享 专享_x000D_ 【机构龙虎榜解读】存储芯片+无人驾驶，自研芯片用于AI、数据中心等行业，触控芯片逐步导入后装车机领域，参股企业光芯片处于研发阶段，两家机构净买入这家公司 解锁直达>>
20230222	【海南矿业：磁化焙烧项目预计2024年一季度投产】财联社2月22日电，海南矿业接受机构调研时表示，磁化焙烧项目预计2024年一季度投产。磁化焙烧项目主要通过选矿技改提质增效，磁化焙烧项目实施并达产后，公司铁精矿品位将从原来的62.5%提高到65.0%以上，铁金属回收率由60.0%提高至85.0%，产品质量及资源综合利用水平显著提升；品位65%的铁精矿产能约115万吨，产量主要取决于原矿供应量，公司会积极寻找稳定外购矿源来提升成品矿产量。	13:24_x000D_ 【海南矿业：磁化焙烧项目预计2024年一季度投产】财联社2月22日电，海南矿业接受机构调研时表示，磁化焙烧项目预计2024年一季度投产。磁化焙烧项目主要通过选矿技改提质增效，磁化焙烧项目实施并达产后，公司铁精矿品位将从原来的62.5%提高到65.0%以上，铁金属回收率由60.0%提高至85.0%，产品质量及资源综合利用水平显著提升；品位65%的铁精矿产能约115万吨，产量主要取决于原矿供应量，公司会积极寻找稳定外购矿源来提升成品矿产量。
20230804	【中科院专家发声：不要再盲目炒作室温超导】财联社8月4日电，如何评价韩国团队的实验和论文？如何看待室温超导引发的热议？中国科学院高能物理研究所研究员徐庆金表示，公众对室温超导高度关注，说明了大家对于科学话题的热情，这是令人高兴的地方。但有些自媒体过于“标题党”，夸大其词，严重误导了大家。他还表示，室温超导是非常美好的，但实现室温超导也是艰难的。 (中国日报)	11:02:10_x000D_ 【中科院专家发声：不要再盲目炒作室温超导】财联社8月4日电，如何评价韩国团队的实验和论文？如何看待室温超导引发的热议？中国科学院高能物理研究所研究员徐庆金表示，公众对室温超导高度关注，说明了大家对于科学话题的热情，这是令人高兴的地方。但有些自媒体过于“标题党”，夸大其词，严重误导了大家。他还表示，室温超导是非常美好的，但实现室温超导也是艰难的。 (中国日报)
20230202	【东港股份：已基于OpenAI GPT-3展开研究 考虑在已有业务的“数据分析、自动回答”方面进行尝试】财联社2月2日电，东港股份在互动平台表示，公司已基于OpenAI GPT-3展开研究，考虑在已有业务的“数据分析、自动回答”方面进行尝试。	17:23_x000D_ 【东港股份：已基于OpenAI GPT-3展开研究 考虑在已有业务的“数据分析、自动回答”方面进行尝试】财联社2月2日电，东港股份在互动平台表示，公司已基于OpenAI GPT-3展开研究，考虑在已有业务的“数据分析、自动回答”方面进行尝试。
20230110	【康辰药业：KC1036进入胸腺肿瘤II期临床研究】财联社1月10日电，康辰药业公告，KC1036进入胸腺肿瘤II期临床研究。本II期临床研究已通过四川大学华西医院临床试验伦理审查委员会和上海市胸科医院伦理委员会审核，近期将正式启动受试者招募工作。	19:01_x000D_ 【康辰药业：KC1036进入胸腺肿瘤II期临床研究】财联社1月10日电，康辰药业公告，KC1036进入胸腺肿瘤II期临床研究。本II期临床研究已通过四川大学华西医院临床试验伦理审查委员会和上海市胸科医院伦理委员会审核，近期将正式启动受试者招募工作。
20230628	【奋达科技：拟参与认购Keep港交所首次公开发行股份】财联社6月28日电，奋达科技公告，拟使用自有资金不超过500万美元等值港元作为基石投资者参与认购Keep拟在香港联合交易所有限公司发行的首次公开发行股份。	19:22:27_x000D_ 【奋达科技：拟参与认购Keep港交所首次公开发行股份】财联社6月28日电，奋达科技公告，拟使用自有资金不超过500万美元等值港元作为基石投资者参与认购Keep拟在香港联合交易所有限公司发行的首次公开发行股份。
20230706	【北向资金今日净卖出13.44亿元 分众传媒净卖出3.68亿元】财联社7月6日电，北向资金今日净卖出13.44亿元。分众传媒、招商银行、中国平安分别获净卖出3.68亿元、3.55亿元、2.77亿元。中兴通讯净买入额居首，金额为4.44亿元。	17:31:32_x000D_ 【北向资金今日净卖出13.44亿元 分众传媒净卖出3.68亿元】财联社7月6日电，北向资金今日净卖出13.44亿元。分众传媒、招商银行、中国平安分别获净卖出3.68亿元、3.55亿元、2.77亿元。中兴通讯净买入额居首，金额为4.44亿元。
20230725	【李民出任建行党委委员 或将出任该行副行长】财联社7月25日电，李民已被任命为中国建设银行党委委员。在经过必要的程序后，李民或将出任该行副行长。李民此前为建行人力资源部总经理。 (21财经)	13:10:38_x000D_ 【李民出任建行党委委员 或将出任该行副行长】财联社7月25日电，李民已被任命为中国建设银行党委委员。在经过必要的程序后，李民或将出任该行副行长。李民此前为建行人力资源部总经理。 (21财经)
20230731	19:43 _x000D_ [[+_+]]_x000D_ 专享 专享_x000D_ 【电报解读】刚刚！三个核电项目获核准，机构预计本轮核电设备价值量或超2300亿元，这家公司已具备二三四代核电机组关键部件供货能力 解锁直达>>	19:43 _x000D_ [[+_+]]_x000D_ 专享 专享_x000D_ 【电报解读】刚刚！三个核电项目获核准，机构预计本轮核电设备价值量或超2300亿元，这家公司已具备二三四代核电机组关键部件供货能力 解锁直达>>
20230314	【中钢国际：钢铁企业推进产能置换 加大低碳冶金布局的投资需求将逐渐增多】财联社3月14日电，中钢国际投资者关系活动记录表显示，2023年，从钢铁行业发展趋势来看，将继续深化去产能，行业集中度逐步上升。特别是在国家重点行业节能降碳系列政策引导下，钢铁企业推进产能置换、加大低碳冶金布局的投资需求将逐渐增多。	17:08_x000D_ 【中钢国际：钢铁企业推进产能置换 加大低碳冶金布局的投资需求将逐渐增多】财联社3月14日电，中钢国际投资者关系活动记录表显示，2023年，从钢铁行业发展趋势来看，将继续深化去产能，行业集中度逐步上升。特别是在国家重点行业节能降碳系列政策引导下，钢铁企业推进产能置换、加大低碳冶金布局的投资需求将逐渐增多。
20230317	【葫芦娃：药品注射用头孢他啶通过仿制药一致性评价】财联社3月17日电，葫芦娃公告，药品注射用头孢他啶通过仿制药一致性评价。	16:39_x000D_ 【葫芦娃：药品注射用头孢他啶通过仿制药一致性评价】财联社3月17日电，葫芦娃公告，药品注射用头孢他啶通过仿制药一致性评价。
20230824	【会稽山：“一日一熏”气泡黄酒线上销售额已突破300万元】财联社8月24日电，会稽山在互动平台表示，公司开发的“一日一熏”气泡黄酒，目前集中在线上销售，以电商为主，线下重点市场试点销售的方式进行推广。“一日一熏”上线后，公司电商团队采取爆款短视频、每天16个小时直播，受到了年轻人的喜好，产品自今年7月初上市后，在一个多月内成为夏日爆款冰饮。截至目前，这款“一日一熏”气泡黄酒线上销售额已突破300万元。	12:08:57_x000D_ 【会稽山：“一日一熏”气泡黄酒线上销售额已突破300万元】财联社8月24日电，会稽山在互动平台表示，公司开发的“一日一熏”气泡黄酒，目前集中在线上销售，以电商为主，线下重点市场试点销售的方式进行推广。“一日一熏”上线后，公司电商团队采取爆款短视频、每天16个小时直播，受到了年轻人的喜好，产品自今年7月初上市后，在一个多月内成为夏日爆款冰饮。截至目前，这款“一日一熏”气泡黄酒线上销售额已突破300万元。
20230531	【主力资金监控：非银金融板块净流出超23亿】财联社5月31日电，财联社星矿数据显示，今日主力资金净流入航运、贵金属、商业零售等板块，净流出非银金融、医药生物、证券行业Ⅱ等板块，其中非银金融板块净流出23.17亿。个股方面，中远海科涨停，主力资金净买入3.09亿元，新易盛、金山办公、英飞拓等获主力资金净流入居前；浪潮信息遭净卖出超7亿，东方财富、金桥信息、中国平安等主力资金净流出额居前。	14:21:31_x000D_ 【主力资金监控：非银金融板块净流出超23亿】财联社5月31日电，财联社星矿数据显示，今日主力资金净流入航运、贵金属、商业零售等板块，净流出非银金融、医药生物、证券行业Ⅱ等板块，其中非银金融板块净流出23.17亿。个股方面，中远海科涨停，主力资金净买入3.09亿元，新易盛、金山办公、英飞拓等获主力资金净流入居前；浪潮信息遭净卖出超7亿，东方财富、金桥信息、中国平安等主力资金净流出额居前。
20230630	【晨光生物：上半年净利预增16.06%–26.87%】财联社6月30日电，晨光生物公告，2023年1—6月，预计归属于上市公司股东的净利润2.79亿元–3.05亿元，比上年同期增长16.06%–26.87%。2023年上半年公司主要产品持续发力，辣椒红色素、食品级叶黄素和香辛料提取物销量和收入同比增长，其他潜力品种持续提升市场份额；子公司新疆晨光业绩增长；受以上因素影响公司整体业绩同比增长。	20:45:50_x000D_ 【晨光生物：上半年净利预增16.06%–26.87%】财联社6月30日电，晨光生物公告，2023年1—6月，预计归属于上市公司股东的净利润2.79亿元–3.05亿元，比上年同期增长16.06%–26.87%。2023年上半年公司主要产品持续发力，辣椒红色素、食品级叶黄素和香辛料提取物销量和收入同比增长，其他潜力品种持续提升市场份额；子公司新疆晨光业绩增长；受以上因素影响公司整体业绩同比增长。
20230131	【中航机电：2月8日起连续停牌直至终止上市、实施换股吸收合并】财联社1月30日电，中航机电公告，公司股票将自2023年2月8日开市时起开始连续停牌，此后进入现金选择权派发、行权申报、行权清算交收阶段，不再交易。现金选择权实施完毕后，公司将向深交所申请终止上市。公司股东所持股份将在实施换股后，转换成中航电子本次发行的A股股份在上交所上市及挂牌交易。2023年2月7日为公司股票最后一个交易日。	22:53_x000D_ 【中航机电：2月8日起连续停牌直至终止上市、实施换股吸收合并】财联社1月30日电，中航机电公告，公司股票将自2023年2月8日开市时起开始连续停牌，此后进入现金选择权派发、行权申报、行权清算交收阶段，不再交易。现金选择权实施完毕后，公司将向深交所申请终止上市。公司股东所持股份将在实施换股后，转换成中航电子本次发行的A股股份在上交所上市及挂牌交易。2023年2月7日为公司股票最后一个交易日。
20230613	【金山办公：WPS香港和奇文N维拟询价转让461.52万股】《科创板日报》13日讯，金山办公公告，拟参与本次询价转让的股东为WPS香港、奇文一维、奇文二维、奇文三维、奇文四维、奇文五维、奇文六维、奇文七维、奇文九维(简称“奇文N维”)；拟转让股份的总数为461.52万股，占上市公司总股本的比例为1%。本次询价转让为非公开转让，不会通过集中竞价交易方式进行。受让方通过询价转让受让的股份，在受让后6个月内不得转让。	15:57:30_x000D_ 【金山办公：WPS香港和奇文N维拟询价转让461.52万股】《科创板日报》13日讯，金山办公公告，拟参与本次询价转让的股东为WPS香港、奇文一维、奇文二维、奇文三维、奇文四维、奇文五维、奇文六维、奇文七维、奇文九维(简称“奇文N维”)；拟转让股份的总数为461.52万股，占上市公司总股本的比例为1%。本次询价转让为非公开转让，不会通过集中竞价交易方式进行。受让方通过询价转让受让的股份，在受让后6个月内不得转让。
20230111	【又一新能源车企宣布上调价格 广汽埃安预计3月初最高涨价6000元】财联社1月11日电，广汽埃安发布消息，根据国家相关政策规定，新能源汽车购置补贴政策于2022年12月31日终止，在此之后上牌的车辆，国家将不再给予补贴（补贴额度：纯电动车12600元/辆）。受以上因素影响，埃安预计今年3月初对旗下相关车型的官方指导价进行上调，上调幅度为3000元-6000元不等。	19:44_x000D_ 【又一新能源车企宣布上调价格 广汽埃安预计3月初最高涨价6000元】财联社1月11日电，广汽埃安发布消息，根据国家相关政策规定，新能源汽车购置补贴政策于2022年12月31日终止，在此之后上牌的车辆，国家将不再给予补贴（补贴额度：纯电动车12600元/辆）。受以上因素影响，埃安预计今年3月初对旗下相关车型的官方指导价进行上调，上调幅度为3000元-6000元不等。
20230309	【海南矿业与宝武资源签订战略合作协议 全年供应100万吨铁矿石】财联社3月9日电，海南矿业官微消息，3月7日，海南矿业与宝武资源在上海签订2023年度战略合作协议。根据战略合作协议，双方将坚持“互为优先”原则，在供需不平衡时，双方优先保证对方所需的供应资源或所需的销售渠道，海南矿业全年向宝武资源供应100万吨铁矿石，包括块矿和精粉，服务对象包括中国宝武集团下属钢铁主业和矿山生产单元。	22:28_x000D_ 【海南矿业与宝武资源签订战略合作协议 全年供应100万吨铁矿石】财联社3月9日电，海南矿业官微消息，3月7日，海南矿业与宝武资源在上海签订2023年度战略合作协议。根据战略合作协议，双方将坚持“互为优先”原则，在供需不平衡时，双方优先保证对方所需的供应资源或所需的销售渠道，海南矿业全年向宝武资源供应100万吨铁矿石，包括块矿和精粉，服务对象包括中国宝武集团下属钢铁主业和矿山生产单元。
20230321	【博世科：签订约6.88亿元-9.01亿元海外供货合同】财联社3月21日电，博世科公告，近日，公司与海外纸业公司签订了供货合同，合同总价约合人民币6.88亿元-9.01亿元。	19:04_x000D_ 【博世科：签订约6.88亿元-9.01亿元海外供货合同】财联社3月21日电，博世科公告，近日，公司与海外纸业公司签订了供货合同，合同总价约合人民币6.88亿元-9.01亿元。
20230322	【凌云光：目前公司产品正在与ChatGLM-6B做联合测试】财联社3月22日电，凌云光在互动平台表示，目前公司产品正在与ChatGLM-6B做联合测试，应用在数字人AI对话中，相比常规的AI对话，使用ChatGLM-6B模型的数字人有显著的生成效率和语言能力的提升。	15:31_x000D_ 【凌云光：目前公司产品正在与ChatGLM-6B做联合测试】财联社3月22日电，凌云光在互动平台表示，目前公司产品正在与ChatGLM-6B做联合测试，应用在数字人AI对话中，相比常规的AI对话，使用ChatGLM-6B模型的数字人有显著的生成效率和语言能力的提升。
20230129	【迪威尔：2022年净利同比预增304%左右】财联社1月29日电，迪威尔公告，预计2022年净利润为1.3亿元左右，同比增加303.86%左右。主要原因是随着全球石油和天然气的需求增长，原油市场回暖，油气公司投资意愿变强，直接推动油气设备制造行业的复苏，特别是深海领域油气资本投入加大，给公司带来较多订单，产能不断释放，收入增加。	19:41_x000D_ 【迪威尔：2022年净利同比预增304%左右】财联社1月29日电，迪威尔公告，预计2022年净利润为1.3亿元左右，同比增加303.86%左右。主要原因是随着全球石油和天然气的需求增长，原油市场回暖，油气公司投资意愿变强，直接推动油气设备制造行业的复苏，特别是深海领域油气资本投入加大，给公司带来较多订单，产能不断释放，收入增加。
20230118	【主力资金监控：西安饮食遭净卖出超3亿元】财联社1月18日电，财联社星矿数据显示，今日早盘主力资金净流入有色金属、航运、电器机械等板块，净流出医药生物、大金融、证券等板块，其中净流出医药生物板块超9亿元。个股方面，隆基绿能上涨，主力资金净买入2.74亿元，通达股份、英飞拓、中油资本获主力资金净流入居前；西安饮食遭净卖出超3亿元，隆基机械、亿利达、众生药业主力资金净流出额居前。	10:56_x000D_ 【主力资金监控：西安饮食遭净卖出超3亿元】财联社1月18日电，财联社星矿数据显示，今日早盘主力资金净流入有色金属、航运、电器机械等板块，净流出医药生物、大金融、证券等板块，其中净流出医药生物板块超9亿元。个股方面，隆基绿能上涨，主力资金净买入2.74亿元，通达股份、英飞拓、中油资本获主力资金净流入居前；西安饮食遭净卖出超3亿元，隆基机械、亿利达、众生药业主力资金净流出额居前。
20230210	【天士力：拟3.9亿元参设生物医药股权投资合伙企业】财联社2月10日电，天士力公告，公司拟以自有资金3.9亿元认购绍兴天士力生物医药股权投资合伙企业（有限合伙）39%份额。合伙企业将以医药医疗相关产业，包括生物制药、高端医疗器械、医疗健康大数据、精准医疗、特殊医学用途食品等的高科技、高成长且具有良好发展前景和退出渠道的企业为主要投资方向。	16:24_x000D_ 【天士力：拟3.9亿元参设生物医药股权投资合伙企业】财联社2月10日电，天士力公告，公司拟以自有资金3.9亿元认购绍兴天士力生物医药股权投资合伙企业（有限合伙）39%份额。合伙企业将以医药医疗相关产业，包括生物制药、高端医疗器械、医疗健康大数据、精准医疗、特殊医学用途食品等的高科技、高成长且具有良好发展前景和退出渠道的企业为主要投资方向。
20230220	【电信运营板块强势 中国电信触及涨停】财联社2月20日电，电信运营板块震荡走强，中国电信触及涨停，中国联通、中国移动大涨6%。《科创板日报》记者独家获悉，中国电信已全面布局大模型技术研发并取得阶段性成果，积极关注产业版“ChatGPT”并已具备相关技术研发基础，初步具备文章续写、主题写作、同义句生成、多轮对话和长文本摘要等能力。	10:08_x000D_ 【电信运营板块强势 中国电信触及涨停】财联社2月20日电，电信运营板块震荡走强，中国电信触及涨停，中国联通、中国移动大涨6%。《科创板日报》记者独家获悉，中国电信已全面布局大模型技术研发并取得阶段性成果，积极关注产业版“ChatGPT”并已具备相关技术研发基础，初步具备文章续写、主题写作、同义句生成、多轮对话和长文本摘要等能力。
20230414	【江波龙：公司企业级PCIe eSSD和RDIMM产品有望逐步放量增长】财联社4月14日电，江波龙在接受调研时表示，随着市场需求的复苏，公司产品结构的进一步提升，公司企业级PCIe eSSD和RDIMM产品有望逐步实现放量增长，给公司带来新的业绩增长动力。	22:14:59_x000D_ 【江波龙：公司企业级PCIe eSSD和RDIMM产品有望逐步放量增长】财联社4月14日电，江波龙在接受调研时表示，随着市场需求的复苏，公司产品结构的进一步提升，公司企业级PCIe eSSD和RDIMM产品有望逐步实现放量增长，给公司带来新的业绩增长动力。
20230427	【海尔智家：一季度净利润同比增长12.6%】财联社4月27日电，海尔智家披露一季报，一季度归母净利润39.7亿元，同比增长12.60%。	18:28:57_x000D_ 【海尔智家：一季度净利润同比增长12.6%】财联社4月27日电，海尔智家披露一季报，一季度归母净利润39.7亿元，同比增长12.60%。
20230510	【江波龙：2022年自研存储芯片产品中 4款不同容量产品均已实现量产】财联社5月10日电，江波龙接受机构调研时表示，在封测领域，公司主要集中在测试业务上，其属于公司生产的一个环节，在财务数据上不会体现为公司利润。在自研芯片领域，2022年公司自研SLC NAND Flash存储芯片产品中，4款不同容量的产品均已实现量产，但公司未对其收入进行单独统计。	09:34:41_x000D_ 【江波龙：2022年自研存储芯片产品中 4款不同容量产品均已实现量产】财联社5月10日电，江波龙接受机构调研时表示，在封测领域，公司主要集中在测试业务上，其属于公司生产的一个环节，在财务数据上不会体现为公司利润。在自研芯片领域，2022年公司自研SLC NAND Flash存储芯片产品中，4款不同容量的产品均已实现量产，但公司未对其收入进行单独统计。
20230420	【一心堂：一季度净利2.39亿元 同比增长33.49%】财联社4月20日电，一心堂发布年报及一季报，2022年公司实现净利润10.1亿元，同比增长9.59%；公司拟每10股派发红利4元（含税）。2023年一季度，公司实现净利润2.39亿元，同比增长33.49%。	16:27:45_x000D_ 【一心堂：一季度净利2.39亿元 同比增长33.49%】财联社4月20日电，一心堂发布年报及一季报，2022年公司实现净利润10.1亿元，同比增长9.59%；公司拟每10股派发红利4元（含税）。2023年一季度，公司实现净利润2.39亿元，同比增长33.49%。
20230424	【嘉泽新能：一季度净利2.46亿元 同比增204.65%】财联社4月24日电，嘉泽新能披露一季报，一季度实现营业收入6.42亿元，同比增长136.30%；净利润2.46亿元，同比增长204.65%；基本每股收益0.10元。	19:20:40_x000D_ 【嘉泽新能：一季度净利2.46亿元 同比增204.65%】财联社4月24日电，嘉泽新能披露一季报，一季度实现营业收入6.42亿元，同比增长136.30%；净利润2.46亿元，同比增长204.65%；基本每股收益0.10元。
20230226	【TCL中环：控股子公司中环领先以增资扩股方式收购鑫芯半导体股权 完成工商变更登记】财联社2月26日电，TCL中环公告，控股子公司中环领先半导体材料有限公司以新增注册资本方式收购鑫芯半导体科技有限公司100%股权，于2023年1月19日第六届董事会第三十一次会议、2月17日2023年第一次临时股东大会审议通过，中环领先与鑫芯半导体各股东签署了《股权收购暨增资协议》。	16:37_x000D_ 【TCL中环：控股子公司中环领先以增资扩股方式收购鑫芯半导体股权 完成工商变更登记】财联社2月26日电，TCL中环公告，控股子公司中环领先半导体材料有限公司以新增注册资本方式收购鑫芯半导体科技有限公司100%股权，于2023年1月19日第六届董事会第三十一次会议、2月17日2023年第一次临时股东大会审议通过，中环领先与鑫芯半导体各股东签署了《股权收购暨增资协议》。
20230113	【迪马股份：2022年预计亏损29.5亿元左右】财联社1月13日电，迪马股份公告，预计2022年度实现归属于上市公司股东的净利润为亏损29.5亿元左右，与上年同期（法定披露数据）相比，将减少8.96亿元左右，减少比例43.65%左右。报告期内，受疫情不断反复及房地产市场下行的综合影响，购房需求持续走弱，房价和成交规模齐降。	19:54_x000D_ 【迪马股份：2022年预计亏损29.5亿元左右】财联社1月13日电，迪马股份公告，预计2022年度实现归属于上市公司股东的净利润为亏损29.5亿元左右，与上年同期（法定披露数据）相比，将减少8.96亿元左右，减少比例43.65%左右。报告期内，受疫情不断反复及房地产市场下行的综合影响，购房需求持续走弱，房价和成交规模齐降。
20230427	【伊利股份：一季度净利润36.15亿元 同比增长2.73%】财联社4月27日电，伊利股份披露一季报，一季度归母净利润36.15亿元，同比增长2.73%。同日披露年报，2022年实现营业收入1226.98亿元，同比增长11.4%；净利润94.31亿元，同比增长8.34%；基本每股收益1.48元；拟每10股派发红利10.4元（含税）。	20:00:00_x000D_ 【伊利股份：一季度净利润36.15亿元 同比增长2.73%】财联社4月27日电，伊利股份披露一季报，一季度归母净利润36.15亿元，同比增长2.73%。同日披露年报，2022年实现营业收入1226.98亿元，同比增长11.4%；净利润94.31亿元，同比增长8.34%；基本每股收益1.48元；拟每10股派发红利10.4元（含税）。
20230427	【光大证券：一季度净利9.58亿元 同比增长43.79%】财联社4月27日电，光大证券公告，一季度净利润9.58亿元，同比增长43.79%。	17:34:16_x000D_ 【光大证券：一季度净利9.58亿元 同比增长43.79%】财联社4月27日电，光大证券公告，一季度净利润9.58亿元，同比增长43.79%。
20230608	【ST南卫：拟面向苏州丰瑞达定增募资不超2.99亿元】财联社6月8日电，ST南卫公告，拟定增募资不超2.99亿元，扣除发行费用后拟全部用于补充流动资金和偿还银行贷款。本次发行的发行对象为苏州丰瑞达。公司目前控股股东、实际控制人为李平，李平与苏州丰瑞达的股份转让完成及本次发行完成后，苏州丰瑞达将合计持有公司29.23%股份，为上市公司控股股东。	19:07:09_x000D_ 【ST南卫：拟面向苏州丰瑞达定增募资不超2.99亿元】财联社6月8日电，ST南卫公告，拟定增募资不超2.99亿元，扣除发行费用后拟全部用于补充流动资金和偿还银行贷款。本次发行的发行对象为苏州丰瑞达。公司目前控股股东、实际控制人为李平，李平与苏州丰瑞达的股份转让完成及本次发行完成后，苏州丰瑞达将合计持有公司29.23%股份，为上市公司控股股东。
20230220	【佛慈制药：实际控制人筹划控制权变更 股票停牌】财联社2月20日电，佛慈制药公告，接到控股股东佛慈集团的通知，公司实际控制人兰州市人民政府国有资产监督管理委员会正在筹划向甘肃省国有资产投资集团有限公司转让佛慈集团控制权，可能涉及公司控制权变更。公司股票自2月21日（星期二）开市起停牌，预计停牌时间不超过2个交易日。	20:53_x000D_ 【佛慈制药：实际控制人筹划控制权变更 股票停牌】财联社2月20日电，佛慈制药公告，接到控股股东佛慈集团的通知，公司实际控制人兰州市人民政府国有资产监督管理委员会正在筹划向甘肃省国有资产投资集团有限公司转让佛慈集团控制权，可能涉及公司控制权变更。公司股票自2月21日（星期二）开市起停牌，预计停牌时间不超过2个交易日。
20230308	【科信技术：控股子公司签订采购框架合同】财联社3月8日电，科信技术公告，控股子公司科信聚力分别与国内D客户、国内N客户签订了《采购框架合同》。D客户拟在合作期间内向科信聚力采购磷酸铁锂电池系统预计数量1.5万台，同时采购电芯和模组，预计采购金额不低于1亿元人民币；N客户拟在合作期间内向科信聚力采购包含电芯、磷酸铁锂电池系统在内的产品预计不低于1.5亿元人民币。	19:51_x000D_ 【科信技术：控股子公司签订采购框架合同】财联社3月8日电，科信技术公告，控股子公司科信聚力分别与国内D客户、国内N客户签订了《采购框架合同》。D客户拟在合作期间内向科信聚力采购磷酸铁锂电池系统预计数量1.5万台，同时采购电芯和模组，预计采购金额不低于1亿元人民币；N客户拟在合作期间内向科信聚力采购包含电芯、磷酸铁锂电池系统在内的产品预计不低于1.5亿元人民币。
20230606	【美吉姆：拟免费延长加盟协议合同期限】财联社6月6日电，美吉姆公告，拟为在董事会审议通过之日处于正常运营状态的美吉姆加盟中心、美吉姆直营中心和小吉姆加盟中心提供免费延长加盟协议合同期限1年的优惠选择权。	19:01:05_x000D_ 【美吉姆：拟免费延长加盟协议合同期限】财联社6月6日电，美吉姆公告，拟为在董事会审议通过之日处于正常运营状态的美吉姆加盟中心、美吉姆直营中心和小吉姆加盟中心提供免费延长加盟协议合同期限1年的优惠选择权。
20230607	【格林美：拟以1亿元-1.5亿元回购股份】财联社6月7日电，格林美公告，拟以1亿元-1.5亿元回购股份，回购股份的价格为不超过人民币10.29元/股。	19:35:43_x000D_ 【格林美：拟以1亿元-1.5亿元回购股份】财联社6月7日电，格林美公告，拟以1亿元-1.5亿元回购股份，回购股份的价格为不超过人民币10.29元/股。
20230103	【温氏股份：已耗资2.03亿元回购1089.94万股】财联社1月3日电，温氏股份公告，截至2022年12月30日，公司通过股份回购专用证券账户以集中竞价交易方式累计回购公司股份数量为1089.94万股，占公司总股本的0.17%。本次回购股份的最高成交价为18.98元/股，最低成交价为18.34元/股，成交总金额为2.03亿元（不含交易费用）。	15:45_x000D_ 【温氏股份：已耗资2.03亿元回购1089.94万股】财联社1月3日电，温氏股份公告，截至2022年12月30日，公司通过股份回购专用证券账户以集中竞价交易方式累计回购公司股份数量为1089.94万股，占公司总股本的0.17%。本次回购股份的最高成交价为18.98元/股，最低成交价为18.34元/股，成交总金额为2.03亿元（不含交易费用）。
20230825	【唐人神：公司有生产水产饲料 暂未有意向发展水产养殖业务】财联社8月25日电，唐人神回复投资者表示，公司有生产水产饲料。公司是一家专注于生猪全产业链三十多年的企业，目前主营业务是生物饲料、健康养殖、品牌肉品。其中，生物饲料包括猪料、禽料、水产料等。公司在养殖业务方面重点投资布局生猪养殖业务，暂未有意向发展水产养殖业务。	13:21:52_x000D_ 【唐人神：公司有生产水产饲料 暂未有意向发展水产养殖业务】财联社8月25日电，唐人神回复投资者表示，公司有生产水产饲料。公司是一家专注于生猪全产业链三十多年的企业，目前主营业务是生物饲料、健康养殖、品牌肉品。其中，生物饲料包括猪料、禽料、水产料等。公司在养殖业务方面重点投资布局生猪养殖业务，暂未有意向发展水产养殖业务。
20230103	【莎普爱思：拟6650万元收购青岛视康100%股权】财联社1月3日电，莎普爱思公告，拟以现金收购上海芳芷医疗管理有限公司持有的青岛视康眼科医院有限公司100%股权，该部分股权评估价格为7150万元，公司基于青岛视康向上海芳芷派发了500万元期后分红的考虑，最终成交价格为6650万元。本次收购完成后，青岛视康将成为公司的全资子公司。	19:47_x000D_ 【莎普爱思：拟6650万元收购青岛视康100%股权】财联社1月3日电，莎普爱思公告，拟以现金收购上海芳芷医疗管理有限公司持有的青岛视康眼科医院有限公司100%股权，该部分股权评估价格为7150万元，公司基于青岛视康向上海芳芷派发了500万元期后分红的考虑，最终成交价格为6650万元。本次收购完成后，青岛视康将成为公司的全资子公司。
20230308	【美联储主席鲍威尔：恢复价格稳定可能需要保持一段时间的限制性政策立场】财联社3月7日电，美联储主席鲍威尔表示，为使政策立场足够限制性以使通胀逐步回归2%，持续提高政策利率可能是合适的；劳动力市场仍然非常紧张；恢复价格稳定可能需要我们保持一段时间的限制性政策立场；历史告诫我们不要过早放松政策；会坚持到工作完成为止。	23:15_x000D_ 【美联储主席鲍威尔：恢复价格稳定可能需要保持一段时间的限制性政策立场】财联社3月7日电，美联储主席鲍威尔表示，为使政策立场足够限制性以使通胀逐步回归2%，持续提高政策利率可能是合适的；劳动力市场仍然非常紧张；恢复价格稳定可能需要我们保持一段时间的限制性政策立场；历史告诫我们不要过早放松政策；会坚持到工作完成为止。
20230807	【凯赛生物：上半年净利2.42亿元 同比降28.12%】财联社8月7日电，凯赛生物公告，上半年公司实现营业收入10.3亿元，同比下降20.05%；净利润2.42亿元，同比下降28.12%；基本每股收益0.41元。	18:33:18_x000D_ 【凯赛生物：上半年净利2.42亿元 同比降28.12%】财联社8月7日电，凯赛生物公告，上半年公司实现营业收入10.3亿元，同比下降20.05%；净利润2.42亿元，同比下降28.12%；基本每股收益0.41元。
20230817	【炬芯科技：董事长提议2650万元-5300万元回购股份】财联社8月17日电，炬芯科技公告，董事长提议2650万元-5300万元回购股份，回购价格不超过人民币43元/股。	18:56:43_x000D_ 【炬芯科技：董事长提议2650万元-5300万元回购股份】财联社8月17日电，炬芯科技公告，董事长提议2650万元-5300万元回购股份，回购价格不超过人民币43元/股。
20230722	【辰安科技：公司研建了“防汛大脑”等系列产品】财联社7月22日电，辰安科技在互动平台表示，公司研建了防汛防台应急指挥辅助决策系统、防洪指挥调度系统以及“防汛大脑”等系列产品，助力提升防洪排涝工作管理水平，保障人民群众生命财产安全。公司会结合实际把握适合自身的市场机会。	08:19:51_x000D_ 【辰安科技：公司研建了“防汛大脑”等系列产品】财联社7月22日电，辰安科技在互动平台表示，公司研建了防汛防台应急指挥辅助决策系统、防洪指挥调度系统以及“防汛大脑”等系列产品，助力提升防洪排涝工作管理水平，保障人民群众生命财产安全。公司会结合实际把握适合自身的市场机会。
20230321	【赛为智能：公司实控人、董事长解除留置】财联社3月21日电，赛为智能公告，此前公告，公司实际控制人、董事长周勇因涉嫌行贿被安徽省滁州市全椒县监察委员会调查并采取留置措施。3月20日，公司收到周勇家属通知，周勇已于当日解除留置措施。目前周勇能够正常履行公司董事长、法定代表人等职责。	18:30_x000D_ 【赛为智能：公司实控人、董事长解除留置】财联社3月21日电，赛为智能公告，此前公告，公司实际控制人、董事长周勇因涉嫌行贿被安徽省滁州市全椒县监察委员会调查并采取留置措施。3月20日，公司收到周勇家属通知，周勇已于当日解除留置措施。目前周勇能够正常履行公司董事长、法定代表人等职责。
20230904	【中控技术：拟通过海外投资控股平台投资设立四家境外下属全资子公司】财联社9月4日电，中控技术公告，拟通过海外投资控股平台中控国际控股投资设立四家境外下属全资子公司，向中控制造（马来西亚）投资7.27亿元人民币，向中控制造（沙特）投资2.18亿元人民币，向中控国际投资7.27亿元人民币，向中控技术（哈萨克斯坦）投资7265万人民币，总投资额为17.4亿元人民币，资金来源为公司GDR募集资金。	18:05:35_x000D_ 【中控技术：拟通过海外投资控股平台投资设立四家境外下属全资子公司】财联社9月4日电，中控技术公告，拟通过海外投资控股平台中控国际控股投资设立四家境外下属全资子公司，向中控制造（马来西亚）投资7.27亿元人民币，向中控制造（沙特）投资2.18亿元人民币，向中控国际投资7.27亿元人民币，向中控技术（哈萨克斯坦）投资7265万人民币，总投资额为17.4亿元人民币，资金来源为公司GDR募集资金。
20230421	【昊华科技：2022年净利润增长30.67%至11.65亿元 拟10派6.4元】财联社4月21日电，昊华科技公布2022年年度报告，报告期实现营业收入90.67亿元，同比增长22.13%；归属于上市公司股东的净利润11.65亿元，同比增长30.67%；基本每股收益1.2872元。拟向全体股东每10股分配现金红利6.4元(含税)。	16:24:42_x000D_ 【昊华科技：2022年净利润增长30.67%至11.65亿元 拟10派6.4元】财联社4月21日电，昊华科技公布2022年年度报告，报告期实现营业收入90.67亿元，同比增长22.13%；归属于上市公司股东的净利润11.65亿元，同比增长30.67%；基本每股收益1.2872元。拟向全体股东每10股分配现金红利6.4元(含税)。
20230213	【拓尔思：公司已与阿里云达成阿里云合作伙伴框架协议】财联社2月13日电，拓尔思在互动平台表示，公司已与阿里云计算有限公司达成阿里云合作伙伴框架协议，双方基于阿里云在云计算平台、大数据、人工智能等多方面的优势资源，通过资源共享，建立合作伙伴自有资源和阿里云平台相结合的业务合作及市场推广机制。	12:38_x000D_ 【拓尔思：公司已与阿里云达成阿里云合作伙伴框架协议】财联社2月13日电，拓尔思在互动平台表示，公司已与阿里云计算有限公司达成阿里云合作伙伴框架协议，双方基于阿里云在云计算平台、大数据、人工智能等多方面的优势资源，通过资源共享，建立合作伙伴自有资源和阿里云平台相结合的业务合作及市场推广机制。
20230113	【广联航空：子公司成都航新在中航工业西南地区主机厂配套供应链中处于重要地位】财联社1月13日电，广联航空在互动平台表示，公司三大综合性基地分别位于哈尔滨、成都、西安，成都航新作为公司的全资子公司是入驻成都新都航空产业园的首批六家企业之一，在中航工业西南地区主机厂配套供应链中处于重要地位。	20:05_x000D_ 【广联航空：子公司成都航新在中航工业西南地区主机厂配套供应链中处于重要地位】财联社1月13日电，广联航空在互动平台表示，公司三大综合性基地分别位于哈尔滨、成都、西安，成都航新作为公司的全资子公司是入驻成都新都航空产业园的首批六家企业之一，在中航工业西南地区主机厂配套供应链中处于重要地位。
20230525	【天赐材料：子公司投资设立中外合资企业】财联社5月25日电，天赐材料公告，全资子公司九江天赐与中央硝子株式会社共同投资设立中外合资企业天赐中硝（九江）新材料有限公司，注册资本为4.5亿元，合资企业经营规模规划六氟磷酸锂（LiPF6）浓缩液年产能150,000吨、溶剂年产能70,000吨。	18:16:37_x000D_ 【天赐材料：子公司投资设立中外合资企业】财联社5月25日电，天赐材料公告，全资子公司九江天赐与中央硝子株式会社共同投资设立中外合资企业天赐中硝（九江）新材料有限公司，注册资本为4.5亿元，合资企业经营规模规划六氟磷酸锂（LiPF6）浓缩液年产能150,000吨、溶剂年产能70,000吨。
20230710	【中兴商业：上半年净利同比预增87.63%-146.01%】财联社7月10日电，中兴商业公告，预计2023年半年度归母净利4500万元-5900万元，同比增长87.63%-146.01%。2023年以来，随着经济持续复苏，消费市场预期加快好转，客流逐渐回升，公司销售额持续上升，净利润同比大幅增加。	16:21:51_x000D_ 【中兴商业：上半年净利同比预增87.63%-146.01%】财联社7月10日电，中兴商业公告，预计2023年半年度归母净利4500万元-5900万元，同比增长87.63%-146.01%。2023年以来，随着经济持续复苏，消费市场预期加快好转，客流逐渐回升，公司销售额持续上升，净利润同比大幅增加。
20230831	【中科星图：国科光电将成为公司的间接控股股东】财联社8月31日电，中科星图公告，中国科学院将中科院空天院持有的中科九度37.52%股权全部无偿划转至中科院空天院全资资产管理公司国科光电。本次无偿划转完成后，中科九度作为公司直接控股股东、中科院空天院作为公司实际控制人均未发生变化，国科光电将成为公司的间接控股股东。	20:33:35_x000D_ 【中科星图：国科光电将成为公司的间接控股股东】财联社8月31日电，中科星图公告，中国科学院将中科院空天院持有的中科九度37.52%股权全部无偿划转至中科院空天院全资资产管理公司国科光电。本次无偿划转完成后，中科九度作为公司直接控股股东、中科院空天院作为公司实际控制人均未发生变化，国科光电将成为公司的间接控股股东。
20230804	【大北农：对外捐赠8000万元公司产品及2000万元捐款】财联社8月4日电，大北农公告，公司成立京津冀抗洪及灾后农牧渔业恢复发展工作小组，将陆续捐赠总价值8000万元的公司产品：消毒剂、饲料、动保、肥料等物资，公司员工捐款2000万元，助力农牧渔业灾后恢复生产。	18:49:12_x000D_ 【大北农：对外捐赠8000万元公司产品及2000万元捐款】财联社8月4日电，大北农公告，公司成立京津冀抗洪及灾后农牧渔业恢复发展工作小组，将陆续捐赠总价值8000万元的公司产品：消毒剂、饲料、动保、肥料等物资，公司员工捐款2000万元，助力农牧渔业灾后恢复生产。
20230223	【金沃股份：祥禾涌原、上海涌耀拟合计减持不超9.79%股份】财联社2月23日电，金沃股份公告，股东祥禾涌原、上海涌耀为一致行动人，合计持有公司9.79%股份，计划通过集中竞价、大宗交易、协议转让等合法方式减持合计不超过751.68万股（占公司总股本的9.79%）。	19:26_x000D_ 【金沃股份：祥禾涌原、上海涌耀拟合计减持不超9.79%股份】财联社2月23日电，金沃股份公告，股东祥禾涌原、上海涌耀为一致行动人，合计持有公司9.79%股份，计划通过集中竞价、大宗交易、协议转让等合法方式减持合计不超过751.68万股（占公司总股本的9.79%）。
20230606	财联社6月6日电，日经225指数收盘涨0.9%，报32506.78点。	14:02:55_x000D_ 财联社6月6日电，日经225指数收盘涨0.9%，报32506.78点。
20230510	17:39 _x000D_ [[+_+]]_x000D_ 专享 专享_x000D_ 【风口研报·公司】除了客车，还有一个细分赛道有望迎来黄金三年，分析师强call公司已实现全产业链覆盖且氢电并举，销量有望迅速回暖、还能享受更高估值溢价；另有	17:39 _x000D_ [[+_+]]_x000D_ 专享 专享_x000D_ 【风口研报·公司】除了客车，还有一个细分赛道有望迎来黄金三年，分析师强call公司已实现全产业链覆盖且氢电并举，销量有望迅速回暖、还能享受更高估值溢价；另有新能源中低关注度细分有望率先迎来“量利齐升” 解锁直达>>
20230820	【芯瑞达：二季度Mini显示模组营收环比增长近200%】财联社8月20日电，芯瑞达近日接受机构调研时表示，今年二季度Mini显示模组营收环比一季度增长近200%，毛利率表现上：1季度毛利率略低于显示模组均值，二季度因订单快速放大，生产规模效应进一步释放，毛利率超出均值。	19:20:26_x000D_ 【芯瑞达：二季度Mini显示模组营收环比增长近200%】财联社8月20日电，芯瑞达近日接受机构调研时表示，今年二季度Mini显示模组营收环比一季度增长近200%，毛利率表现上：1季度毛利率略低于显示模组均值，二季度因订单快速放大，生产规模效应进一步释放，毛利率超出均值。
20230315	【国联发展集团拍得民生证券34.71亿股股权 成交价91.05亿元】财联社3月15日电，京东司法拍卖平台显示，延时3小时（延时157次）后，泛海控股持有的民生证券34.71亿股股权一拍拍卖于3月15日13：00结束，成交价91.05亿元，由无锡市国联发展(集团)有限公司拍得。	13:13_x000D_ 【国联发展集团拍得民生证券34.71亿股股权 成交价91.05亿元】财联社3月15日电，京东司法拍卖平台显示，延时3小时（延时157次）后，泛海控股持有的民生证券34.71亿股股权一拍拍卖于3月15日13：00结束，成交价91.05亿元，由无锡市国联发展(集团)有限公司拍得。
20230314	【云路股份：股东拟减持不超0.58%公司股份】财联社3月14日电，云路股份公告，持股1.16%的股东江志俊拟通过集中竞价方式减持其所持有的公司股份不超过70万股，即不超过公司总股本的0.58%。	16:11_x000D_ 【云路股份：股东拟减持不超0.58%公司股份】财联社3月14日电，云路股份公告，持股1.16%的股东江志俊拟通过集中竞价方式减持其所持有的公司股份不超过70万股，即不超过公司总股本的0.58%。
20230324	【新瀚新材：张萍拟减持不超过1%】财联社3月24日电，新瀚新材公告，股东张萍拟减持不超过1%。	17:11_x000D_ 【新瀚新材：张萍拟减持不超过1%】财联社3月24日电，新瀚新材公告，股东张萍拟减持不超过1%。
20230116	【川能动力：预计2022年净利润同比增长73%-110%】财联社1月16日电，川能动力公告，预计2022年净利润6亿元-7.3亿元，同比增长72.55%-109.94%；本期归母净利润较上年同期增长主要系锂盐、锂矿（基建矿）产品销售价格、销售量较上年同期均有较大幅度增长所致。	17:53_x000D_ 【川能动力：预计2022年净利润同比增长73%-110%】财联社1月16日电，川能动力公告，预计2022年净利润6亿元-7.3亿元，同比增长72.55%-109.94%；本期归母净利润较上年同期增长主要系锂盐、锂矿（基建矿）产品销售价格、销售量较上年同期均有较大幅度增长所致。
20230108	【陕国投A业绩快报：2022年净利润同比增长24%】财联社1月8日电，陕国投A公布2022年度业绩快报，2022年度公司实现营业总收入18.98亿元，同比降低0.56%；计提1.39亿元资产减值准备后实现归母净利润9.1亿元，同比增长24.29%；基本每股收益0.2296元，同比增长24.31%。	17:43_x000D_ 【陕国投A业绩快报：2022年净利润同比增长24%】财联社1月8日电，陕国投A公布2022年度业绩快报，2022年度公司实现营业总收入18.98亿元，同比降低0.56%；计提1.39亿元资产减值准备后实现归母净利润9.1亿元，同比增长24.29%；基本每股收益0.2296元，同比增长24.31%。
20230214	【人福医药：子公司帕拉米韦注射液上市许可申请获受理】财联社2月14日电，人福医药公告，控股子公司人福利康的药品帕拉米韦注射液上市许可申请获受理。帕拉米韦是一种神经氨酸酶抑制剂，可选择性地抑制人甲型和乙型流感病毒的神经氨酸酶，适用于甲型或乙型流感病毒感染。	15:49_x000D_ 【人福医药：子公司帕拉米韦注射液上市许可申请获受理】财联社2月14日电，人福医药公告，控股子公司人福利康的药品帕拉米韦注射液上市许可申请获受理。帕拉米韦是一种神经氨酸酶抑制剂，可选择性地抑制人甲型和乙型流感病毒的神经氨酸酶，适用于甲型或乙型流感病毒感染。
20230517	07:13 _x000D_ [[+_+]]_x000D_ 专享 专享_x000D_ 【研选】半导体细分赛道中，存储板块有望较早复苏，分析师看好存储厂商有望迎业绩与估值的戴维斯双击；这家公司覆盖视频/互联网/移动互联网内容日常监管，分析师看好	07:13 _x000D_ [[+_+]]_x000D_ 专享 专享_x000D_ 【研选】半导体细分赛道中，存储板块有望较早复苏，分析师看好存储厂商有望迎业绩与估值的戴维斯双击；这家公司覆盖视频/互联网/移动互联网内容日常监管，分析师看好其在视频AI监管领域的布局 解锁直达>>
20230608	【通合科技：拟5.2亿元投资建设石家庄总部扩建项目】财联社6月8日电，通合科技公告，拟在石家庄高新区投资建设石家庄总部扩建项目（包括但不限于高功率充电模块产业化建设项目和研发中心建设项目），本项目征地面积约85亩，投资总额为5.2亿元。	20:06:57_x000D_ 【通合科技：拟5.2亿元投资建设石家庄总部扩建项目】财联社6月8日电，通合科技公告，拟在石家庄高新区投资建设石家庄总部扩建项目（包括但不限于高功率充电模块产业化建设项目和研发中心建设项目），本项目征地面积约85亩，投资总额为5.2亿元。
20230421	【长江通信：2022年净利润同比增长102.97% 拟10派0.8元】财联社4月21日电，长江通信公布2022年年度报告，营业收入2.32亿元，同比增长111%，净利润1.86亿元，同比增长102.97%，扣非净利润1.72亿元，同比增长86.75%，基本每股收益0.94元，拟每10股派发现金红利0.80元。	18:37:30_x000D_ 【长江通信：2022年净利润同比增长102.97% 拟10派0.8元】财联社4月21日电，长江通信公布2022年年度报告，营业收入2.32亿元，同比增长111%，净利润1.86亿元，同比增长102.97%，扣非净利润1.72亿元，同比增长86.75%，基本每股收益0.94元，拟每10股派发现金红利0.80元。
20230505	【牧原股份：4月份销售生猪534.2万头 销售收入91.06亿元】财联社5月5日电，牧原股份公告，4月份，公司销售生猪534.2万头，销售收入91.06亿元；4月份，公司商品猪价格相比2023年3月份呈现下降趋势，商品猪销售均价14.2元/公斤，比2023年3月份下降5.33%。	18:56:06_x000D_ 【牧原股份：4月份销售生猪534.2万头 销售收入91.06亿元】财联社5月5日电，牧原股份公告，4月份，公司销售生猪534.2万头，销售收入91.06亿元；4月份，公司商品猪价格相比2023年3月份呈现下降趋势，商品猪销售均价14.2元/公斤，比2023年3月份下降5.33%。
20230109	【长安汽车：12月汽车销量同比增长43.69%】财联社1月9日电，长安汽车公告，12月汽车销量25.58万辆，同比增长43.69%。2022年1-12月，长安汽车销量234.62万辆，同比增加1.98%，自主品牌销量1,874,569 辆，同比增加6.83%；自主乘用车销量1,390,387辆，同比增加15.46%；自主品牌海外销量169,773辆，同比增加48.83%。	16:39_x000D_ 【长安汽车：12月汽车销量同比增长43.69%】财联社1月9日电，长安汽车公告，12月汽车销量25.58万辆，同比增长43.69%。2022年1-12月，长安汽车销量234.62万辆，同比增加1.98%，自主品牌销量1,874,569 辆，同比增加6.83%；自主乘用车销量1,390,387辆，同比增加15.46%；自主品牌海外销量169,773辆，同比增加48.83%。
20230815	【证券板块午后走高 沪指翻红】财联社8月15日电，大金融方向午后走高，沪指拉升翻红，此前一度跌近1%，创业板指、深成指跌幅收窄至0.7%。供销社、医药、大金融等方向涨幅居前，两市上涨个股近1500只。	14:24:39_x000D_ 【证券板块午后走高 沪指翻红】财联社8月15日电，大金融方向午后走高，沪指拉升翻红，此前一度跌近1%，创业板指、深成指跌幅收窄至0.7%。供销社、医药、大金融等方向涨幅居前，两市上涨个股近1500只。
20230106	【新黄浦：拟定增募资不超过17亿元】财联社1月6日电，新黄浦公告，拟定增募资不超过17亿元，用于上海闵行星悦梦庭租赁住房项目、上海闵行星悦河畔家园租赁住房项目、上海宝山新顾城欣康苑保障住房项目、上海奉贤欣平苑保障住房项目、湖州玉象府项目、补充流动资金。	18:33_x000D_ 【新黄浦：拟定增募资不超过17亿元】财联社1月6日电，新黄浦公告，拟定增募资不超过17亿元，用于上海闵行星悦梦庭租赁住房项目、上海闵行星悦河畔家园租赁住房项目、上海宝山新顾城欣康苑保障住房项目、上海奉贤欣平苑保障住房项目、湖州玉象府项目、补充流动资金。
20230825	【三达膜：目前在核电站的业务应用场景是处理核电站的高硅废水】财联社8月25日电，三达膜在互动平台表示，公司目前在核电站的业务应用场景是处理核电站的高硅废水，处理核电站的高硅废水是解决核电站普遍存在含硼水中溶硅高的问题，从而保证核电站机组的安全运行。	09:54:27_x000D_ 【三达膜：目前在核电站的业务应用场景是处理核电站的高硅废水】财联社8月25日电，三达膜在互动平台表示，公司目前在核电站的业务应用场景是处理核电站的高硅废水，处理核电站的高硅废水是解决核电站普遍存在含硼水中溶硅高的问题，从而保证核电站机组的安全运行。
20230719	08:22 _x000D_ [[+_+]]_x000D_ 专享 专享_x000D_ 【点金互动易】存储+3D打印+无人驾驶，存储芯片封装基板已小批量生产，产品可用于3D打印设备、无人驾驶领域，这家公司通讯终端应用产品包括服务器、交换机等 解	08:22 _x000D_ [[+_+]]_x000D_ 专享 专享_x000D_ 【点金互动易】存储+3D打印+无人驾驶，存储芯片封装基板已小批量生产，产品可用于3D打印设备、无人驾驶领域，这家公司通讯终端应用产品包括服务器、交换机等 解锁直达>>
20230608	【得润电子：目前盐城华麟MiniLED、光模块相关产品尚未量产】财联社6月8日电，有投资者在互动平台向得润电子提问，目前公司的自主研发的MiniLED、光模块是否已经量产？公司回答表示，目前盐城华麟相关产品尚未量产。	21:42:13_x000D_ 【得润电子：目前盐城华麟MiniLED、光模块相关产品尚未量产】财联社6月8日电，有投资者在互动平台向得润电子提问，目前公司的自主研发的MiniLED、光模块是否已经量产？公司回答表示，目前盐城华麟相关产品尚未量产。
20230330	【工商银行2022年净利润3,604.8亿元人民币 同比增长3.5%】财联社3月30日电，工商银行2022年净利润3,604.8亿元人民币，同比增长3.5%，预估3,655.2亿元人民币；营业收入8,414.41亿元，下降2.3%；平均总资产回报率0.97%，加权平均权益回报率11.43%。	19:09_x000D_ 【工商银行2022年净利润3,604.8亿元人民币 同比增长3.5%】财联社3月30日电，工商银行2022年净利润3,604.8亿元人民币，同比增长3.5%，预估3,655.2亿元人民币；营业收入8,414.41亿元，下降2.3%；平均总资产回报率0.97%，加权平均权益回报率11.43%。
20230216	【深成指、创业板指双双跌逾1%】财联社2月16日电，指数走弱，深成指、创业板指双双下挫跌逾1%，沪指跌0.65%，两市下跌个股超4300家，炸板率超过60%，CPO、数字水印、先进封装Chiplet等板块指数跌幅居前。	14:25_x000D_ 【深成指、创业板指双双跌逾1%】财联社2月16日电，指数走弱，深成指、创业板指双双下挫跌逾1%，沪指跌0.65%，两市下跌个股超4300家，炸板率超过60%，CPO、数字水印、先进封装Chiplet等板块指数跌幅居前。
20230816	11:16 _x000D_ [[+_+]]_x000D_ 专享 专享_x000D_ 【盘中宝】三星将推出的新一代Galaxy S24系列，将运用这项尖端科技，该技术是6G确定性最高技术之一，这家公司可提供相控阵T/R芯片完整解决方案 解锁直	11:16 _x000D_ [[+_+]]_x000D_ 专享 专享_x000D_ 【盘中宝】三星将推出的新一代Galaxy S24系列，将运用这项尖端科技，该技术是6G确定性最高技术之一，这家公司可提供相控阵T/R芯片完整解决方案 解锁直达>>
20230505	【汉缆股份：公司及子公司中标5.7亿元国家电网项目】财联社5月5日电，汉缆股份公告，公司及全资子公司在国家电网有限公司2023年采购里中标总金额约5.7亿元，约占公司2022年度经审计的营业收入的5.79%。	17:25:07_x000D_ 【汉缆股份：公司及子公司中标5.7亿元国家电网项目】财联社5月5日电，汉缆股份公告，公司及全资子公司在国家电网有限公司2023年采购里中标总金额约5.7亿元，约占公司2022年度经审计的营业收入的5.79%。
20230201	20:40 _x000D_ [[+_+]]_x000D_ 专享 专享_x000D_ 【机构龙虎榜解读】ChatGPT+AIGC+人工智能，数据库产品核心代码自主率100%，旗下数字经济研究院成立机器人研究中心，布局Web3.0领域，机构净买	20:40 _x000D_ [[+_+]]_x000D_ 专享 专享_x000D_ 【机构龙虎榜解读】ChatGPT+AIGC+人工智能，数据库产品核心代码自主率100%，旗下数字经济研究院成立机器人研究中心，布局Web3.0领域，机构净买入这家企业 解锁直达>>
20230314	【创业板指跌逾2% 下跌个股近4500只】财联社3月14日电，指数走弱，创业板指下挫跌逾2%，沪指跌1.52%，深成指跌1.88%。汽车产业链、光伏储能、消费电子、旅游等板块跌幅居前，两市下跌个股近4500只。	11:09_x000D_ 【创业板指跌逾2% 下跌个股近4500只】财联社3月14日电，指数走弱，创业板指下挫跌逾2%，沪指跌1.52%，深成指跌1.88%。汽车产业链、光伏储能、消费电子、旅游等板块跌幅居前，两市下跌个股近4500只。
20230113	19:00 _x000D_ [[+_+]]_x000D_ 专享 专享_x000D_ 【机构龙虎榜解读】充换电+虚拟现实+建筑装饰，已成立全资子公司经营充换电业务，联手合作伙伴打造虚拟现实下沉浸式体验，这家公司获大额净买入 解锁直达>>	19:00 _x000D_ [[+_+]]_x000D_ 专享 专享_x000D_ 【机构龙虎榜解读】充换电+虚拟现实+建筑装饰，已成立全资子公司经营充换电业务，联手合作伙伴打造虚拟现实下沉浸式体验，这家公司获大额净买入 解锁直达>>
20230313	11:24 _x000D_ [[+_+]]_x000D_ 专享 专享_x000D_ 【风口研报·公司】公司在移动云领域连续中标且参与了多个月活用户达亿级的产品工作，近期又官宣接入百度文心一言，业绩将持续高速增长 解锁直达>>	11:24 _x000D_ [[+_+]]_x000D_ 专享 专享_x000D_ 【风口研报·公司】公司在移动云领域连续中标且参与了多个月活用户达亿级的产品工作，近期又官宣接入百度文心一言，业绩将持续高速增长 解锁直达>>
20230626	【三大指数均跌逾1% 下跌个股近3900只】财联社6月26日电，指数走弱，沪指下挫跌逾1%，深成指跌1.19%，创业板指跌1.15%。数据要素、泛AI、算力等板块指数跌幅居前，两市下跌个股近3900只。	09:56:46_x000D_ 【三大指数均跌逾1% 下跌个股近3900只】财联社6月26日电，指数走弱，沪指下挫跌逾1%，深成指跌1.19%，创业板指跌1.15%。数据要素、泛AI、算力等板块指数跌幅居前，两市下跌个股近3900只。
20230227	【华友钴业拟申请将公司镍产品注册成为LME交割品】财联社2月27日电，知情人士称，华友钴业总裁陈红良计划与伦敦金属交易所（LME）讨论申请把该公司镍产品注册成为LME交割品。 (彭博)	09:38_x000D_ 【华友钴业拟申请将公司镍产品注册成为LME交割品】财联社2月27日电，知情人士称，华友钴业总裁陈红良计划与伦敦金属交易所（LME）讨论申请把该公司镍产品注册成为LME交割品。 (彭博)
20230106	08:12 _x000D_ [[+_+]]_x000D_ 专享 专享_x000D_ 【点金互动易】信创+元宇宙+数字经济，细分业务新签订单额较21年全年增长近400%，这家企业承建的省级平台可与多个市县数据交换共享 解锁直达>>	08:12 _x000D_ [[+_+]]_x000D_ 专享 专享_x000D_ 【点金互动易】信创+元宇宙+数字经济，细分业务新签订单额较21年全年增长近400%，这家企业承建的省级平台可与多个市县数据交换共享 解锁直达>>
20230203	08:15 _x000D_ [[+_+]]_x000D_ 专享 专享_x000D_ 【点金互动易】半导体设备清洗再生技术打破国外垄断，已量产14nm制程洗净工艺，这家公司长期与世界三大头部半导体设备厂战略合作 解锁直达>>	08:15 _x000D_ [[+_+]]_x000D_ 专享 专享_x000D_ 【点金互动易】半导体设备清洗再生技术打破国外垄断，已量产14nm制程洗净工艺，这家公司长期与世界三大头部半导体设备厂战略合作 解锁直达>>
20230331	【广晟有色：2022年净利2.32亿元 同比增67.03%】财联社3月30日电，广晟有色披露年报，2022年实现营业收入228.64亿元，同比增长42.03%；净利润2.32亿元，同比增长67.03%；基本每股收益0.70元。	23:14_x000D_ 【广晟有色：2022年净利2.32亿元 同比增67.03%】财联社3月30日电，广晟有色披露年报，2022年实现营业收入228.64亿元，同比增长42.03%；净利润2.32亿元，同比增长67.03%；基本每股收益0.70元。
20230305	22:16 _x000D_ [[+_+]]_x000D_ 专享 专享_x000D_ 【公告全知道】数字经济+时空大数据+信创+人工智能+云计算+智慧政务！公司数据类产品拥有时空大数据分析、数据确权和数据交易等能力 解锁直达>>	22:16 _x000D_ [[+_+]]_x000D_ 专享 专享_x000D_ 【公告全知道】数字经济+时空大数据+信创+人工智能+云计算+智慧政务！公司数据类产品拥有时空大数据分析、数据确权和数据交易等能力 解锁直达>>
20230810	【东莞控股：拟收购照洲投资100%股权】财联社8月10日电，东莞控股公告，拟以不超过7.74亿元价格收购照洲投资100%股权以实现投资惠州惠东至东莞常平高速公路东莞段项目。	18:59:26_x000D_ 【东莞控股：拟收购照洲投资100%股权】财联社8月10日电，东莞控股公告，拟以不超过7.74亿元价格收购照洲投资100%股权以实现投资惠州惠东至东莞常平高速公路东莞段项目。
20230421	【中核钛白：“年产50万吨磷酸铁项目”一期已开车调试】财联社4月21日电，中核钛白在互动平台表示，“年产50万吨磷酸铁项目”一期(10万吨磷酸铁/年)已开车调试，预计在本季度实现销售。	16:38:01_x000D_ 【中核钛白：“年产50万吨磷酸铁项目”一期已开车调试】财联社4月21日电，中核钛白在互动平台表示，“年产50万吨磷酸铁项目”一期(10万吨磷酸铁/年)已开车调试，预计在本季度实现销售。
20230308	【贵研铂业：董事兼总经理辞职】财联社3月8日电，贵研铂业公告，潘再富先生因个人原因，申请辞去公司董事、董事会战略/投资发展委员会委员、总经理职务。	18:12_x000D_ 【贵研铂业：董事兼总经理辞职】财联社3月8日电，贵研铂业公告，潘再富先生因个人原因，申请辞去公司董事、董事会战略/投资发展委员会委员、总经理职务。
20230306	【维远股份：原材料纯苯和丙烯价格从去年6月以来呈下降趋势 原材料成本有所降低】财联社3月6日电，维远股份在互动平台表示，公司原材料纯苯和丙烯价格从去年6月以来呈下降趋势，原材料成本有所降低。	17:23_x000D_ 【维远股份：原材料纯苯和丙烯价格从去年6月以来呈下降趋势 原材料成本有所降低】财联社3月6日电，维远股份在互动平台表示，公司原材料纯苯和丙烯价格从去年6月以来呈下降趋势，原材料成本有所降低。
20230601	10:00 _x000D_ [[+_+]]_x000D_ 专享 专享_x000D_ 【盘中宝】华为将发布F5.5G智简全光网，万兆网络助力企业数字化转型，这家公司是华为在物联网场景方面的核心供应商 解锁直达>>	10:00 _x000D_ [[+_+]]_x000D_ 专享 专享_x000D_ 【盘中宝】华为将发布F5.5G智简全光网，万兆网络助力企业数字化转型，这家公司是华为在物联网场景方面的核心供应商 解锁直达>>
20230419	【惠发食品：公司在淄博有产品销售业务】财联社4月19日电，惠发食品在互动平台表示，公司在淄博有产品销售业务，其中墨鱼烧、鱼豆腐、烤肠等产品适合用于烧烤。	09:12:38_x000D_ 【惠发食品：公司在淄博有产品销售业务】财联社4月19日电，惠发食品在互动平台表示，公司在淄博有产品销售业务，其中墨鱼烧、鱼豆腐、烤肠等产品适合用于烧烤。
20230131	【天马科技：控股股东陈庆堂拟增持5000万元-1亿元】财联社1月31日电，天马科技公告，控股股东陈庆堂拟增持5000万元-1亿元，部分董监高及核心管理人员拟合计增持105万股。	18:53_x000D_ 【天马科技：控股股东陈庆堂拟增持5000万元-1亿元】财联社1月31日电，天马科技公告，控股股东陈庆堂拟增持5000万元-1亿元，部分董监高及核心管理人员拟合计增持105万股。
20230428	【中国中车：一季度净利润6.15亿元 同比增长180.01%】财联社4月28日电，中国中车公告，一季度净利润6.15亿元，同比增长180.01%，本期产品销售较上年同期有所增长。	16:57:23_x000D_ 【中国中车：一季度净利润6.15亿元 同比增长180.01%】财联社4月28日电，中国中车公告，一季度净利润6.15亿元，同比增长180.01%，本期产品销售较上年同期有所增长。
20230213	【甬金股份：非公开发行申请获证监会核准】财联社2月13日电，甬金股份公告，公司收到中国证监会批复，核准公司非公开发行不超过1.01亿股新股。	16:35_x000D_ 【甬金股份：非公开发行申请获证监会核准】财联社2月13日电，甬金股份公告，公司收到中国证监会批复，核准公司非公开发行不超过1.01亿股新股。
20230823	【恒丰纸业：拟投建年产4万吨绿色低定量特种涂布纸项目】财联社8月23日电，恒丰纸业公告，拟投资新建年产4万吨绿色低定量特种涂布纸项目，投资金额预计3.38亿元。	17:01:07_x000D_ 【恒丰纸业：拟投建年产4万吨绿色低定量特种涂布纸项目】财联社8月23日电，恒丰纸业公告，拟投资新建年产4万吨绿色低定量特种涂布纸项目，投资金额预计3.38亿元。
20230303	【外高桥业绩快报：2022年净利润同比增长32.36%】财联社3月3日电，外高桥发布业绩快报，2022年营业收入92.33亿元，同比增长3.93%，净利润12.4亿元，同比增长32.36%。	17:19_x000D_ 【外高桥业绩快报：2022年净利润同比增长32.36%】财联社3月3日电，外高桥发布业绩快报，2022年营业收入92.33亿元，同比增长3.93%，净利润12.4亿元，同比增长32.36%。
20230214	【仕佳光子：公司研发窄线宽激光器产品可以应用于卫星通信领域】财联社2月14日电，仕佳光子在互动平台表示，公司研发的窄线宽激光器产品可以应用于卫星通信领域。	12:33_x000D_ 【仕佳光子：公司研发窄线宽激光器产品可以应用于卫星通信领域】财联社2月14日电，仕佳光子在互动平台表示，公司研发的窄线宽激光器产品可以应用于卫星通信领域。
20230106	【联环药业：苯磺贝他斯汀片获得药品注册证书】财联社1月6日电，联环药业公告，公司苯磺贝他斯汀片获得《药品注册证书》，苯磺贝他斯汀属于抗过敏药物。	16:54_x000D_ 【联环药业：苯磺贝他斯汀片获得药品注册证书】财联社1月6日电，联环药业公告，公司苯磺贝他斯汀片获得《药品注册证书》，苯磺贝他斯汀属于抗过敏药物。
20230510	【深圳本地股尾盘直线拉升 深深房A率先涨停】财联社5月10日电，深深房A率先封涨停，深振业A、深物业A、特力A等个股跟涨。	14:45:00_x000D_ 【深圳本地股尾盘直线拉升 深深房A率先涨停】财联社5月10日电，深深房A率先封涨停，深振业A、深物业A、特力A等个股跟涨。
20230117	【密尔克卫：拟以2000万元-3000万元回购股份】财联社1月17日电，密尔克卫公告，拟以2000万元-3000万元回购股份，回购价格不超过人民币140元/股。	18:53_x000D_ 【密尔克卫：拟以2000万元-3000万元回购股份】财联社1月17日电，密尔克卫公告，拟以2000万元-3000万元回购股份，回购价格不超过人民币140元/股。
20230428	【吉祥航空：一季度净利润1.65亿元】财联社4月28日电，吉祥航空公告，一季度营业收入44.42亿元，同比增长78.67%，净利润1.65亿元。	15:38:39_x000D_ 【吉祥航空：一季度净利润1.65亿元】财联社4月28日电，吉祥航空公告，一季度营业收入44.42亿元，同比增长78.67%，净利润1.65亿元。
20230105	【微电生理：一次性使用固定弯标测导管获得美国FDA认证】《科创板日报》5日讯，微电生理公告，一次性使用固定弯标测导管获得美国FDA认证。	15:49_x000D_ 【微电生理：一次性使用固定弯标测导管获得美国FDA认证】《科创板日报》5日讯，微电生理公告，一次性使用固定弯标测导管获得美国FDA认证。
20230518	12:47 _x000D_ [[+_+]]_x000D_ 专享 专享_x000D_ 【机构调研】这家多模态视听内容安全监管领导者卡位AIGC赛道，业绩或将大幅转正 解锁直达>>	12:47 _x000D_ [[+_+]]_x000D_ 专享 专享_x000D_ 【机构调研】这家多模态视听内容安全监管领导者卡位AIGC赛道，业绩或将大幅转正 解锁直达>>
20230110	13:51 _x000D_ [[+_+]]_x000D_ 专享 专享_x000D_ 【盘中宝·独家】这家公司这几类产品订单暴增，供不应求，生产线满负荷生产 解锁直达>>	13:51 _x000D_ [[+_+]]_x000D_ 专享 专享_x000D_ 【盘中宝·独家】这家公司这几类产品订单暴增，供不应求，生产线满负荷生产 解锁直达>>
20230825	【双良节能：上半年净利润6.18亿元 同比增长74.89%】财联社8月25日电，双良节能公告，上半年净利润6.18亿元，同比增长74.89%。	20:05:58_x000D_ 【双良节能：上半年净利润6.18亿元 同比增长74.89%】财联社8月25日电，双良节能公告，上半年净利润6.18亿元，同比增长74.89%。
20230821	【众生药业：上半年净利润同比增长3.12%】财联社8月21日电，众生药业公告，上半年净利润2.09亿元，同比增长3.12%。	18:06:54_x000D_ 【众生药业：上半年净利润同比增长3.12%】财联社8月21日电，众生药业公告，上半年净利润2.09亿元，同比增长3.12%。
20230828	【核污染概念股持续走强 捷强装备20CM涨停】财联社8月28日电，捷强装备20CM涨停，建工修复、中电环保涨超10%，华盛昌、安泰科技涨停，德尔未来、中广核技等跟涨。	10:45:47_x000D_ 【核污染概念股持续走强 捷强装备20CM涨停】财联社8月28日电，捷强装备20CM涨停，建工修复、中电环保涨超10%，华盛昌、安泰科技涨停，德尔未来、中广核技等跟涨。
20230907	【财联社9月7日早间新闻精选】1、证监会党委6日召开会议强调，坚决贯彻党中央“要活跃资本市场，提振投资者信心”的重要部署，加大资本市场防假打假力度，会同有关方面稳妥化解重点领域风险。2、中共中央办公厅、国务院办公厅发文进一步加强矿山安全生产工作，鼓励大型矿山企业兼并重组和整合技改中小型非煤矿山企业。3、财政部、税务总局宣布，自2023年1月1日至2027年12月31日，允许先进制造业企业按照当期可抵扣进项税额加计5%抵减应纳增值税税额。4、国家发展改革委上线“民间投资问题反映专栏”，并将建立健全民间投资问题“收集—办理—反馈”闭环机制，助力营造良好民间投资政策环境。5、国家互联网信息办公室日前对知网依法作出网络安全审查相关行政处罚，责令停止违法处理个人信息行为，并处5000万元罚款。6、上海二手房最新成交数据昨日出炉。统计显示，8月份本市二手房成交1.4万套。这也是自3月份以来，申城二手…	08:03:31_x000D_ 【财联社9月7日早间新闻精选】_x000D_ _x000D_ 1、证监会党委6日召开会议强调，坚决贯彻党中央“要活跃资本市场，提振投资者信心”的重要部署，加大资本市场防假打假力度，会同有关方面稳妥化解重点领域风险。_x000D_ _x000D_ 2、中共中央办公厅、国务院办公厅发文进一步加强矿山安全生产工作，鼓励大型矿山企业兼并重组和整合技改中小型非煤矿山企业。_x000D_ _x000D_ 3、财政部、税务总局宣布，自2023年1月1日至2027年12月31日，允许先进制造业企业按照当期可抵扣进项税额加计5%抵减应纳增值税税额。_x000D_ _x000D_ 4、国家发展改革委上线“民间投资问题反映专栏”，并将建立健全民间投资问题“收集—办理—反馈”闭环机制，助力营造良好民间投资政策环境。_x000D_ _x000D_ 5、国家互联网信息办公室日前对知网…
20230420	【龙虎榜|万兴科技今日20cm涨停 四机构净卖出1.15亿元】财联社4月20日电，万兴科技今日20cm涨停，成交额18.43亿元，换手率16.08%，盘后龙虎榜数据显示，一机构净买入1556.73万元，四机构净卖出1.15亿元。	16:25:46_x000D_ 【龙虎榜|万兴科技今日20cm涨停 四机构净卖出1.15亿元】财联社4月20日电，万兴科技今日20cm涨停，成交额18.43亿元，换手率16.08%，盘后龙虎榜数据显示，一机构净买入1556.73万元，四机构净卖出1.15亿元。
20230102	【下周资本市场大事提醒：周一A股、港股和美股均休市 成品油开年首涨即将兑现】1、下周二将公布中国12月财新制造业PMI，周四12月财新服务业和综合PMI、12月贸易帐和以美元计算贸易帐、12月进出口年率和总额、12月以美元计算进出口年率。2、中国成品油油价将在1月3日(周二)24时开启2023年首次调整窗口。有机构预测，中国成品油价格大概率上调。3、自2023年1月3日起，银行间人民币外汇市场交易时间延长至北京时间次日3:00，人民币汇率中间价及浮动幅度、做市商报价等市场管理制度适用时间相应延长。4、下周将有16580亿元逆回购到期，分别为9440亿元7天期逆回购与7140亿元14天期逆回购。下周二至周五7天期逆回购将分别到期3670亿元、1890亿元、2050亿元、1830亿元；14天期逆回购将分别到期2170亿元、1410亿元、1530亿元、2030亿元。另外，下周无MLF到期。5、…	22:05_x000D_ 【下周资本市场大事提醒：周一A股、港股和美股均休市 成品油开年首涨即将兑现】_x000D_ _x000D_ 1、下周二将公布中国12月财新制造业PMI，周四12月财新服务业和综合PMI、12月贸易帐和以美元计算贸易帐、12月进出口年率和总额、12月以美元计算进出口年率。_x000D_ _x000D_ 2、中国成品油油价将在1月3日(周二)24时开启2023年首次调整窗口。有机构预测，中国成品油价格大概率上调。_x000D_ _x000D_ 3、自2023年1月3日起，银行间人民币外汇市场交易时间延长至北京时间次日3:00，人民币汇率中间价及浮动幅度、做市商报价等市场管理制度适用时间相应延长。_x000D_ _x000D_ 4、下周将有16580亿元逆回购到期，分别为9440亿元7天期逆回购与7140亿元14天期逆回购。下周二至周五7天期逆回购将分别到期3670亿…
20230827	【证监会：根据近期市场情况，阶段性收紧IPO节奏，促进投融资两端的动态平衡】财联社8月27日电，证监会充分考虑当前市场形势，完善一二级市场逆周期调节机制，围绕合理把握IPO、再融资节奏，作出以下安排：一、根据近期市场情况，阶段性收紧IPO节奏，促进投融资两端的动态平衡。二、对于金融行业上市公司或者其他行业大市值上市公司的大额再融资，实施预沟通机制，关注融资必要性和发行时机。三、突出扶优限劣，对于存在破发、破净、经营业绩持续亏损、财务性投资比例偏高等情形的上市公司再融资，适当限制其融资间隔、融资规模。四、引导上市公司合理确定再融资规模，严格执行融资间隔期要求。审核中将对前次募集资金是否基本使用完毕，前次募集资金项目是否达到预期效益等予以重点关注。五、严格要求上市公司募集资金应当投向主营业务，严限多元化投资。六、房地产上市公司再融资不受破发、破净和亏损限制。	18:00:49_x000D_ 【证监会：根据近期市场情况，阶段性收紧IPO节奏，促进投融资两端的动态平衡】财联社8月27日电，证监会充分考虑当前市场形势，完善一二级市场逆周期调节机制，围绕合理把握IPO、再融资节奏，作出以下安排：一、根据近期市场情况，阶段性收紧IPO节奏，促进投融资两端的动态平衡。二、对于金融行业上市公司或者其他行业大市值上市公司的大额再融资，实施预沟通机制，关注融资必要性和发行时机。三、突出扶优限劣，对于存在破发、破净、经营业绩持续亏损、财务性投资比例偏高等情形的上市公司再融资，适当限制其融资间隔、融资规模。四、引导上市公司合理确定再融资规模，严格执行融资间隔期要求。审核中将对前次募集资金是否基本使用完毕，前次募集资金项目是否达到预期效益等予以重点关注。五、严格要求上市公司募集资金应当投向主营业务，严限多元化投资。六、房地产上市公司再融资不受破发、破净和亏损限制。
20230906	【9月6日涨停分析】今日共37股涨停，连板股总数6只，13股封板未遂，封板率为74%（不含ST股、退市股及未开板新股）。个股方面，业绩+家居装饰的我乐家居8板，华为产业链的捷荣技术6板、华映科技5天4板、蓝箭电子创业板2板，芯片产业链的广信材料创业板2板、蓝英装备创业板首板、扬帆新材创业板首板，汽车产业链的跃岭股份2板、科华控股3天2板，卫星导航概念股华力创通创业板3天2板、震有科技科创板首板。今日收涨个股2743只，收跌个股2124只。	15:23:18_x000D_ 【9月6日涨停分析】今日共37股涨停，连板股总数6只，13股封板未遂，封板率为74%（不含ST股、退市股及未开板新股）。个股方面，业绩+家居装饰的我乐家居8板，华为产业链的捷荣技术6板、华映科技5天4板、蓝箭电子创业板2板，芯片产业链的广信材料创业板2板、蓝英装备创业板首板、扬帆新材创业板首板，汽车产业链的跃岭股份2板、科华控股3天2板，卫星导航概念股华力创通创业板3天2板、震有科技科创板首板。今日收涨个股2743只，收跌个股2124只。
20230906	【午评：创业板指震荡调整跌0.89% 光刻胶概念股持续大涨】财联社9月6日电，市场早盘震荡调整，三大指数均小幅下跌，创业板指领跌。盘面上，半导体板块再度走强，光刻胶方向领涨，扬帆新材、蓝英装备、张江高科、盛剑环境等涨停。卫星导航概念股大涨，震有科技、天迈科技、神宇股份均20CM涨停。华为概念股继续活跃，华力创通、捷荣技术、华映科技等超10股涨停。BC电池概念股开盘冲高，广信材料、永和智控涨停。下跌方面，航运板块陷入调整，中远海能、招商轮船跌超5%。总体上个股跌多涨少，两市超2700只个股下跌。沪深两市今日成交额4357亿，较上个交易日缩量879亿。板块方面，光刻胶、卫星导航、BC电池、军工等板块涨幅居前，航运、核污染防治、游戏、传媒等板块跌幅居前。截至收盘，沪指跌0.34%，深成指跌0.68%，创业板指跌0.89%。北向资金方面，沪股通早盘净流出14.84亿，深股通早盘净流入4.76亿。	11:32:56_x000D_ 【午评：创业板指震荡调整跌0.89% 光刻胶概念股持续大涨】财联社9月6日电，市场早盘震荡调整，三大指数均小幅下跌，创业板指领跌。盘面上，半导体板块再度走强，光刻胶方向领涨，扬帆新材、蓝英装备、张江高科、盛剑环境等涨停。卫星导航概念股大涨，震有科技、天迈科技、神宇股份均20CM涨停。华为概念股继续活跃，华力创通、捷荣技术、华映科技等超10股涨停。BC电池概念股开盘冲高，广信材料、永和智控涨停。下跌方面，航运板块陷入调整，中远海能、招商轮船跌超5%。总体上个股跌多涨少，两市超2700只个股下跌。沪深两市今日成交额4357亿，较上个交易日缩量879亿。板块方面，光刻胶、卫星导航、BC电池、军工等板块涨幅居前，航运、核污染防治、游戏、传媒等板块跌幅居前。截至收盘，沪指跌0.34%，深成指跌0.68%，创业板指跌0.89%。北向资金方面，沪股通早盘净流出14.84…
20230822	【儒竞科技中签号出炉 共约2.29万个】财联社8月22日电，儒竞科技披露首次公开发行股票网上中签结果，中签号码共有22882个，每个中签号码只能认购500股儒竞科技股票。	20:44:51_x000D_ 【儒竞科技中签号出炉 共约2.29万个】财联社8月22日电，儒竞科技披露首次公开发行股票网上中签结果，中签号码共有22882个，每个中签号码只能认购500股儒竞科技股票。
20230823	17:37 _x000D_ [[+_+]]_x000D_ 专享 专享_x000D_ 【风口研报·公司】稀缺人形机器人本体标的，公司牵手顶尖机构开展“电机+关节+大模型交互”关键技术研发，传统业务订单饱满给予业绩支撑；二季度利润环比增长112	17:37 _x000D_ [[+_+]]_x000D_ 专享 专享_x000D_ 【风口研报·公司】稀缺人形机器人本体标的，公司牵手顶尖机构开展“电机+关节+大模型交互”关键技术研发，传统业务订单饱满给予业绩支撑；二季度利润环比增长112%，这家芯片“小黑马”新进Meta供应链 解锁直达>>
20230823	【军信股份：污水（渗滤液）处理是公司目前的主营业务之一】财联社8月23日电，军信股份回复投资者表示，污水（渗滤液）处理是公司目前的主营业务之一，主要是处理生活垃圾渗滤液。	16:55:33_x000D_ 【军信股份：污水（渗滤液）处理是公司目前的主营业务之一】财联社8月23日电，军信股份回复投资者表示，污水（渗滤液）处理是公司目前的主营业务之一，主要是处理生活垃圾渗滤液。
20230829	【电连技术：控股股东、实控人承诺18个月内不减持公司股份】财联社8月29日电，电连技术公告，公司控股股东、实控人陈育宣、林德英自愿承诺，自承诺函签署之日起18个月内不减持其所持有的公司股份；在上述承诺期间内，承诺主体因公司发生资本公积转增股本、派送股票红利、配股、增发等事项取得的新增股份亦遵守上述承诺。	17:01:00_x000D_ 【电连技术：控股股东、实控人承诺18个月内不减持公司股份】财联社8月29日电，电连技术公告，公司控股股东、实控人陈育宣、林德英自愿承诺，自承诺函签署之日起18个月内不减持其所持有的公司股份；在上述承诺期间内，承诺主体因公司发生资本公积转增股本、派送股票红利、配股、增发等事项取得的新增股份亦遵守上述承诺。
20230910	【中信证券：底部区域特征清晰 围绕地产、科技、能源资源三大产业主线积极布局】财联社9月10日电，中信证券研报指出，随着落地政策起效和后续政策接力，经济拐点和修复趋势将不断被数据验证，价格拐点已经出现，外部的扰动将逐渐消退，外资流出的趋势将逐步逆转，当下市场风险收益比佳，底部区域特征清晰，建议忽略短期波动，积极提升仓位，围绕地产、科技、能源资源三大产业主线积极布局。首先，国内价格拐点已经出现，8月宏观数据相比7月改善，政策支持下9月改善将更明显；二季报夯实A股盈利周期底部后，三季报有望迎来新一轮周期上行起点。其次，房地产需求侧的政策加速落地，各项政策正在形成合力，而保障房和城中村改造等接力政策正在路上，对需求提振将更直接；多元化的化债方案将有序推进，财政政策将更加主动积极，各类政策不断落实，直到彻底扭转经济预期和经济运行的负反馈。最后，外资本轮累计流出已接近历史极值，预计后续流出压力将随着…	17:41:14_x000D_ 【中信证券：底部区域特征清晰 围绕地产、科技、能源资源三大产业主线积极布局】财联社9月10日电，中信证券研报指出，随着落地政策起效和后续政策接力，经济拐点和修复趋势将不断被数据验证，价格拐点已经出现，外部的扰动将逐渐消退，外资流出的趋势将逐步逆转，当下市场风险收益比佳，底部区域特征清晰，建议忽略短期波动，积极提升仓位，围绕地产、科技、能源资源三大产业主线积极布局。首先，国内价格拐点已经出现，8月宏观数据相比7月改善，政策支持下9月改善将更明显；二季报夯实A股盈利周期底部后，三季报有望迎来新一轮周期上行起点。其次，房地产需求侧的政策加速落地，各项政策正在形成合力，而保障房和城中村改造等接力政策正在路上，对需求提振将更直接；多元化的化债方案将有序推进，财政政策将更加主动积极，各类政策不断落实，直到彻底扭转经济预期和经济运行的负反馈。最后，外资本轮累计流出已接近…
20230609	【桐昆股份：磊鑫实业拟增持2亿元-4亿元】财联社6月9日电，桐昆股份公告，磊鑫实业拟增持2亿元-4亿元，增持价格不高于18元/股。	16:33:26_x000D_ 【桐昆股份：磊鑫实业拟增持2亿元-4亿元】财联社6月9日电，桐昆股份公告，磊鑫实业拟增持2亿元-4亿元，增持价格不高于18元/股。
20230618	【京东：未来二十年提供超过100万就业岗位、拥有3家收入过万亿公司】财联社6月18日电，京东公布《凝心聚力迈向“35711”梦想》全员信，正式提出面向未来二十年的“35711”梦想：能有3家收入过万亿人民币，净利润过700亿人民币的公司；5家进入世界五百强的公司；7家从零做起市值不低于1000亿人民币的上市公司；能为国家缴纳1000亿人民币税收；提供超过100万就业岗位。	10:39:00_x000D_ 【京东：未来二十年提供超过100万就业岗位、拥有3家收入过万亿公司】财联社6月18日电，京东公布《凝心聚力迈向“35711”梦想》全员信，正式提出面向未来二十年的“35711”梦想：能有3家收入过万亿人民币，净利润过700亿人民币的公司；5家进入世界五百强的公司；7家从零做起市值不低于1000亿人民币的上市公司；能为国家缴纳1000亿人民币税收；提供超过100万就业岗位。
20230621	【午评：创业板指低开低走跌1.41% AI概念股集体调整】财联社6月21日电，市场早盘震荡调整，三大指数均下跌，创业板指领跌。盘面上，复合集流体概念股逆势大涨，东威科技涨超10%，宝明科技、双星新材涨停。机器人概念股继续活跃，新时达、南方精工、中马传动等多股涨停。汽车零部件板块震荡走强，晋拓股份、新坐标涨停。电力股盘中异动，深南电A涨停，天富能源接近涨停。下跌方面，AI概念股集体调整，游戏、传媒等应用方向领跌，三七互娱、南方传媒、金桥信息等多股跌超9%。总体上个股跌多涨少，两市超3200只个股下跌。沪深两市今日成交额6487亿，较上个交易日缩量221亿。板块方面，复合集流体、减速器、电力、汽车零部件等板块涨幅居前，手机游戏、传媒、ChatGPT、虚拟数字人等板块跌幅居前。截至上午收盘，沪指跌0.41%，深成指跌1.16%，创业板指跌1.41%。北向资金方面，沪股通早盘净流入0.36亿，深…	11:33:05_x000D_ 【午评：创业板指低开低走跌1.41% AI概念股集体调整】财联社6月21日电，市场早盘震荡调整，三大指数均下跌，创业板指领跌。盘面上，复合集流体概念股逆势大涨，东威科技涨超10%，宝明科技、双星新材涨停。机器人概念股继续活跃，新时达、南方精工、中马传动等多股涨停。汽车零部件板块震荡走强，晋拓股份、新坐标涨停。电力股盘中异动，深南电A涨停，天富能源接近涨停。下跌方面，AI概念股集体调整，游戏、传媒等应用方向领跌，三七互娱、南方传媒、金桥信息等多股跌超9%。总体上个股跌多涨少，两市超3200只个股下跌。沪深两市今日成交额6487亿，较上个交易日缩量221亿。板块方面，复合集流体、减速器、电力、汽车零部件等板块涨幅居前，手机游戏、传媒、ChatGPT、虚拟数字人等板块跌幅居前。截至上午收盘，沪指跌0.41%，深成指跌1.16%，创业板指跌1.41%。北向资金方面…
20230628	【胡锡进选股套路曝光：几百亿的大盘股 目前处于它们的价值低位】财联社6月28日电，胡锡进表示，刚进股市，我就像在一个雷区里一样，小心翼翼迈着最初几步。我买的几只股票都是盘子大的，最小的市值也是几百亿的，而且它们都有过高点，目前处于它们的价值低位。我太忙了，不可能仔细研究股市里的各种知识和技术，要慢慢来。我现在遵循的就是最基本的规律，我鼓励自己说，最基本规律可能也是最可靠的。	17:08:13_x000D_ 【胡锡进选股套路曝光：几百亿的大盘股 目前处于它们的价值低位】财联社6月28日电，胡锡进表示，刚进股市，我就像在一个雷区里一样，小心翼翼迈着最初几步。我买的几只股票都是盘子大的，最小的市值也是几百亿的，而且它们都有过高点，目前处于它们的价值低位。我太忙了，不可能仔细研究股市里的各种知识和技术，要慢慢来。我现在遵循的就是最基本的规律，我鼓励自己说，最基本规律可能也是最可靠的。
20230412	【山东黄金：预计一季度净利润同比增加27%-43%】财联社4月12日电，山东黄金公告，预计一季度净利润为4亿元至4.5亿元，同比增加27%到43%。报告期内，黄金销售价格优于上年同期水平。	19:04:01_x000D_ 【山东黄金：预计一季度净利润同比增加27%-43%】财联社4月12日电，山东黄金公告，预计一季度净利润为4亿元至4.5亿元，同比增加27%到43%。报告期内，黄金销售价格优于上年同期水平。
20230417	歌尔股份：2023年一季度净利润1.06亿元，同比下降88.22%；2022年净利润17.5亿元，同比下降59.08%，拟10派1元。	19:24:16_x000D_ 歌尔股份：2023年一季度净利润1.06亿元，同比下降88.22%；2022年净利润17.5亿元，同比下降59.08%，拟10派1元。
20230419	【绿茵生态：子公司休闲旅游项目一期已建成落地】财联社4月19日电，绿茵生态在互动平台表示，近期全资子公司森氧文旅与北辰区政府签署了招商引资合作协议，将在天津北辰区建设周末微度假的休闲旅游项目，计划总投资3.3亿元。目前一期项目＜森氧梦秘密花园＞及＜嚒嚒兽梦幻森林＞已建成落地，占地总面积共500亩，总投资3500万，吸引了众多游客前来，加之经济环境与旅游消费复苏等因素，有利于公司文旅产业发展。	12:10:03_x000D_ 【绿茵生态：子公司休闲旅游项目一期已建成落地】财联社4月19日电，绿茵生态在互动平台表示，近期全资子公司森氧文旅与北辰区政府签署了招商引资合作协议，将在天津北辰区建设周末微度假的休闲旅游项目，计划总投资3.3亿元。目前一期项目＜森氧梦秘密花园＞及＜嚒嚒兽梦幻森林＞已建成落地，占地总面积共500亩，总投资3500万，吸引了众多游客前来，加之经济环境与旅游消费复苏等因素，有利于公司文旅产业发展。
20230420	【四方达：拟7亿元投建年产70万克拉功能性金刚石产业化项目】财联社4月20日电，四方达公告，控股子公司河南天璇半导体科技有限责任公司拟在河南省郑州市经济技术开发区投资建设年产70万克拉功能性金刚石产业化项目，项目计划投资额7亿元。	18:33:25_x000D_ 【四方达：拟7亿元投建年产70万克拉功能性金刚石产业化项目】财联社4月20日电，四方达公告，控股子公司河南天璇半导体科技有限责任公司拟在河南省郑州市经济技术开发区投资建设年产70万克拉功能性金刚石产业化项目，项目计划投资额7亿元。
20230424	【方正证券：一季度净利润5.56亿元 同比增长16.55%】财联社4月24日电，方正证券公告，一季度营业收入17.73亿元，同比增长6.3%，净利润5.56亿元，同比增长16.55%。	17:15:19_x000D_ 【方正证券：一季度净利润5.56亿元 同比增长16.55%】财联社4月24日电，方正证券公告，一季度营业收入17.73亿元，同比增长6.3%，净利润5.56亿元，同比增长16.55%。
20230428	【汤姆猫：针对AI智能交互相关产品的研发正常推进】财联社4月28日电，汤姆猫在互动平台表示，在AI智能交互业务领域，公司已接入ChatGPT进行AI语音互动产品功能原型测试，并已将汤姆猫IP形象植入产品功能原型当中，加入语音识别、语音合成、性格设定、内容过滤等功能，测试了语音交互、连续对话等产品性能，初步验证了相关技术实现的可行性。除ChatGPT外，国内外现已有多家机构发布或准备发布其自研自训的预训练通识大模型，公司将选择适合公司的技术方进行合作。截至目前，上述语音交互产品功能原型的首轮封闭式测试已结束完成，针对AI智能交互相关产品的研发进度在正常推进中，相关在研产品下一轮的测试时间、测试形式等尚未确定。	08:07:21_x000D_ 【汤姆猫：针对AI智能交互相关产品的研发正常推进】财联社4月28日电，汤姆猫在互动平台表示，在AI智能交互业务领域，公司已接入ChatGPT进行AI语音互动产品功能原型测试，并已将汤姆猫IP形象植入产品功能原型当中，加入语音识别、语音合成、性格设定、内容过滤等功能，测试了语音交互、连续对话等产品性能，初步验证了相关技术实现的可行性。除ChatGPT外，国内外现已有多家机构发布或准备发布其自研自训的预训练通识大模型，公司将选择适合公司的技术方进行合作。截至目前，上述语音交互产品功能原型的首轮封闭式测试已结束完成，针对AI智能交互相关产品的研发进度在正常推进中，相关在研产品下一轮的测试时间、测试形式等尚未确定。
20230704	【宇通客车：6月汽车销量同比增长111.55%】财联社7月4日电，宇通客车公告，6月汽车销量4726辆，同比增长111.55%。本年累计销量15134辆，同比增长30.84%。	17:07:38_x000D_ 【宇通客车：6月汽车销量同比增长111.55%】财联社7月4日电，宇通客车公告，6月汽车销量4726辆，同比增长111.55%。本年累计销量15134辆，同比增长30.84%。
20230707	【赤天化：盐酸多奈哌齐片通过仿制药一致性评价】财联社7月7日电，赤天化公告，全资子公司圣济堂制药的盐酸多奈哌齐片通过仿制药一致性评价。	17:05:27_x000D_ 【赤天化：盐酸多奈哌齐片通过仿制药一致性评价】财联社7月7日电，赤天化公告，全资子公司圣济堂制药的盐酸多奈哌齐片通过仿制药一致性评价。
20230711	【7月11日午间涨停分析】今日午盘两市共22股涨停，连板股总数4只，14股封板未遂，封板率为61%（不含ST股、退市股及未开板新股）。个股方面，资产重组的大连热电5板，业绩超预期的苏常柴Ａ3板，汽车产业链的众泰汽车7天4板、万安科技2板，卫星通信板块上海沪工2板。	11:46:51_x000D_ 【7月11日午间涨停分析】今日午盘两市共22股涨停，连板股总数4只，14股封板未遂，封板率为61%（不含ST股、退市股及未开板新股）。个股方面，资产重组的大连热电5板，业绩超预期的苏常柴Ａ3板，汽车产业链的众泰汽车7天4板、万安科技2板，卫星通信板块上海沪工2板。
20230215	17:43 _x000D_ [[+_+]]_x000D_ 专享 专享_x000D_ 【风口研报·公司】错过了海天瑞声不能再错过它，公司AI巨量模型已超越OpenAI的GPT-3，且刚推出可用于国产ChatGPT的AI算力服务产品 解锁直达>	17:43 _x000D_ [[+_+]]_x000D_ 专享 专享_x000D_ 【风口研报·公司】错过了海天瑞声不能再错过它，公司AI巨量模型已超越OpenAI的GPT-3，且刚推出可用于国产ChatGPT的AI算力服务产品 解锁直达>>
20230719	【金宏气体：计划再扩产5000吨氧化亚氮产能】财联社7月19日电，金宏气体在接受机构调研时表示，公司氧化亚氮前两期累计产能为8000吨，目前计划再扩产5000吨产能。	18:33:19_x000D_ 【金宏气体：计划再扩产5000吨氧化亚氮产能】财联社7月19日电，金宏气体在接受机构调研时表示，公司氧化亚氮前两期累计产能为8000吨，目前计划再扩产5000吨产能。
20230726	【杰富瑞：上调宁德时代评级至买入 目标价297元】财联社7月26日电，杰富瑞称，宁德时代业绩中的动力电池利润情况好于预期，特别是在考虑竞争的情况下；宁德的市场地位、供应链管理和技术仍然无人能及，上调公司评级至买入。分析师Johnson Wan等在报告中指出，宁德时代管理层将更好的利润率归因于二季度的产品组合，并给予了在更长期展望稳定的指引，这表明公司有能力在利润和产量方面找到正确的平衡，以度过周期。对公司在包括美国在内的海外渗透看法积极，预计在销售组合中会有更高的敞口和利润率。上调公司2023-2025年的盈利预测6%-9%，公司目标价为297元。	08:47:38_x000D_ 【杰富瑞：上调宁德时代评级至买入 目标价297元】财联社7月26日电，杰富瑞称，宁德时代业绩中的动力电池利润情况好于预期，特别是在考虑竞争的情况下；宁德的市场地位、供应链管理和技术仍然无人能及，上调公司评级至买入。分析师Johnson Wan等在报告中指出，宁德时代管理层将更好的利润率归因于二季度的产品组合，并给予了在更长期展望稳定的指引，这表明公司有能力在利润和产量方面找到正确的平衡，以度过周期。对公司在包括美国在内的海外渗透看法积极，预计在销售组合中会有更高的敞口和利润率。上调公司2023-2025年的盈利预测6%-9%，公司目标价为297元。
20230725	【上诉人吴亦凡强奸、聚众淫乱案二审开庭】财联社7月25日电，北京市第三中级人民法院25日依法开庭审理了上诉人吴亦凡强奸、聚众淫乱一案。因涉及被害人隐私，案件依法采取不公开开庭审理方式。2022年11月25日，北京市朝阳区人民法院对本案作出一审判决，对被告人吴亦凡以强奸罪判处有期徒刑十一年六个月，附加驱逐出境；以聚众淫乱罪判处有期徒刑一年十个月，数罪并罚，决定执行有期徒刑十三年，附加驱逐出境。被告人吴亦凡不服，向北京市第三中级人民法院提起上诉。人民法院在开庭前依照相关规定通知了加拿大驻华大使馆。案件审理过程中，依法保障了上诉人吴亦凡的各项诉讼权利。本案将依法择期宣判。	13:01:06_x000D_ 【上诉人吴亦凡强奸、聚众淫乱案二审开庭】财联社7月25日电，北京市第三中级人民法院25日依法开庭审理了上诉人吴亦凡强奸、聚众淫乱一案。因涉及被害人隐私，案件依法采取不公开开庭审理方式。_x000D_ _x000D_ _x000D_ _x000D_ 2022年11月25日，北京市朝阳区人民法院对本案作出一审判决，对被告人吴亦凡以强奸罪判处有期徒刑十一年六个月，附加驱逐出境；以聚众淫乱罪判处有期徒刑一年十个月，数罪并罚，决定执行有期徒刑十三年，附加驱逐出境。被告人吴亦凡不服，向北京市第三中级人民法院提起上诉。_x000D_ _x000D_ _x000D_ _x000D_ 人民法院在开庭前依照相关规定通知了加拿大驻华大使馆。案件审理过程中，依法保障了上诉人吴亦凡的各项诉讼权利。_x000D_ _x000D_ _x000D_ _x000D_ 本案将依法择期宣判。
20230727	【传艺科技：钠离子电池产品大额在手订单和意向订单较为充足】财联社7月27日电，传艺科技回复深交所关注函称，截至关注函回复出具日，公司钠离子电池产品大额在手订单和意向订单较为充足，公司对部分签署大额采购框架协议的客户尚未开始批量供货，主要原因系公司一期4.5GWh产能目前仍处于产能爬坡阶段，实际产能相对有限，部分下游客户的大批量采购需求尚待产能规模进一步释放后方能满足。	19:51:58_x000D_ 【传艺科技：钠离子电池产品大额在手订单和意向订单较为充足】财联社7月27日电，传艺科技回复深交所关注函称，截至关注函回复出具日，公司钠离子电池产品大额在手订单和意向订单较为充足，公司对部分签署大额采购框架协议的客户尚未开始批量供货，主要原因系公司一期4.5GWh产能目前仍处于产能爬坡阶段，实际产能相对有限，部分下游客户的大批量采购需求尚待产能规模进一步释放后方能满足。
20230806	【独家|中科院物理所研究人员：疑似LK—99全悬浮视频具有超导特征 希望看到严谨的结构和物性测试数据】财联社8月6日电，针对近日B站用户上传的疑似LK—99全悬浮视频，中国科学院物理研究所的研究人员今日对财联社记者表示：“如果这个视频确实是用LK—99材料在室温下做的展示，对超导算是一个比较好的辅证，具有超导特征。如一切属实，视频作者大概率已经得到比此前公示的质量更好的样品，希望尽快看到视频作者把严谨的结构和物性测试数据展示出来。”该研究人员指出，和之前LK—99悬浮视频相比，新视频中展现的悬浮更接近超导磁悬浮特征，如能再展示多一些悬浮角度和动态会更好。（财联社记者 邢祺欣）	21:34:00_x000D_ 【独家|中科院物理所研究人员：疑似LK—99全悬浮视频具有超导特征 希望看到严谨的结构和物性测试数据】财联社8月6日电，针对近日B站用户上传的疑似LK—99全悬浮视频，中国科学院物理研究所的研究人员今日对财联社记者表示：“如果这个视频确实是用LK—99材料在室温下做的展示，对超导算是一个比较好的辅证，具有超导特征。如一切属实，视频作者大概率已经得到比此前公示的质量更好的样品，希望尽快看到视频作者把严谨的结构和物性测试数据展示出来。”该研究人员指出，和之前LK—99悬浮视频相比，新视频中展现的悬浮更接近超导磁悬浮特征，如能再展示多一些悬浮角度和动态会更好。（财联社记者 邢祺欣）
20230504	【牧高笛：浙江嘉拓拟减持不超过3%】财联社5月4日电，牧高笛公告，股东浙江嘉拓拟减持不超过3%。	15:51:16_x000D_ 【牧高笛：浙江嘉拓拟减持不超过3%】财联社5月4日电，牧高笛公告，股东浙江嘉拓拟减持不超过3%。
20230515	【天宸股份：拟以5亿元设全资子公司】财联社5月15日电，天宸股份公告，公司拟以自有资金5亿元人民币，投资设立全资子公司“天宸绿色能源科技(芜湖)有限公司”(“标的公司”)。经营范围拟为“一般项目：光伏设备及元器件制造；光伏设备及元器件销售；半导体器件专用设备制造；半导体器件专用设备销售；合同能源管理；储能技术服务；新兴能源技术研发；新能源汽车废旧动力蓄电池回收及梯次利用（不含危险废物经营）等；后置许可项目：建设工程施工（除核电站建设经营、民用机场建设）”。	15:39:15_x000D_ 【天宸股份：拟以5亿元设全资子公司】财联社5月15日电，天宸股份公告，公司拟以自有资金5亿元人民币，投资设立全资子公司“天宸绿色能源科技(芜湖)有限公司”(“标的公司”)。经营范围拟为“一般项目：光伏设备及元器件制造；光伏设备及元器件销售；半导体器件专用设备制造；半导体器件专用设备销售；合同能源管理；储能技术服务；新兴能源技术研发；新能源汽车废旧动力蓄电池回收及梯次利用（不含危险废物经营）等；后置许可项目：建设工程施工（除核电站建设经营、民用机场建设）”。
20230523	【收评：三大指数均跌超1% 北向资金全天净卖出近80亿】财联社5月23日电，大盘全天震荡调整，三大指数均跌超1%，沪指创阶段收盘新低。盘面上，医药、医疗股逆势走强，新冠药方向领涨，翰宇药业、拓新药业涨超10%，特一药业、众生药业、河化股份涨停。电商概念股午后走强，若羽臣涨停，星徽股份涨超10%。CPO概念股盘中一度冲高，光库科技涨超5%，剑桥科技一度涨停。此外，昨日连板个股逆势走强，日播时尚8连板，杭州热电8天7板，丰立智能20CM4连板。下跌方面，AI和中字头两大主线继续调整，鸿博股份、上海电影跌停，中船汉光、中船科技跌超7%。总体上个股跌多涨少，两市超3700只个股下跌。沪深两市今日成交额7658亿，较上个交易日缩量296亿。板块方面，新冠药、电商、创新药、CRO等板块涨幅居前，虚拟电厂、ChatGPT、中字头、云计算等板块跌幅居前。截至收盘，沪指跌1.52%，深成指跌1.03%，创…	15:03:21_x000D_ 【收评：三大指数均跌超1% 北向资金全天净卖出近80亿】财联社5月23日电，大盘全天震荡调整，三大指数均跌超1%，沪指创阶段收盘新低。盘面上，医药、医疗股逆势走强，新冠药方向领涨，翰宇药业、拓新药业涨超10%，特一药业、众生药业、河化股份涨停。电商概念股午后走强，若羽臣涨停，星徽股份涨超10%。CPO概念股盘中一度冲高，光库科技涨超5%，剑桥科技一度涨停。此外，昨日连板个股逆势走强，日播时尚8连板，杭州热电8天7板，丰立智能20CM4连板。下跌方面，AI和中字头两大主线继续调整，鸿博股份、上海电影跌停，中船汉光、中船科技跌超7%。总体上个股跌多涨少，两市超3700只个股下跌。沪深两市今日成交额7658亿，较上个交易日缩量296亿。板块方面，新冠药、电商、创新药、CRO等板块涨幅居前，虚拟电厂、ChatGPT、中字头、云计算等板块跌幅居前。截至收盘，沪指跌1…
20230327	【奋达科技：控股股东拟将5%公司股份转让给格力金投】财联社3月27日电，奋达科技公告，控股股东拟将其持有的公司5%股份以4.38元/股的价格协议转让给格力金投。同日公告，公司与格力集团签署战略合作框架协议，共建共享智能制造平台，在资本运作等领域密切合。	20:33_x000D_ 【奋达科技：控股股东拟将5%公司股份转让给格力金投】财联社3月27日电，奋达科技公告，控股股东拟将其持有的公司5%股份以4.38元/股的价格协议转让给格力金投。同日公告，公司与格力集团签署战略合作框架协议，共建共享智能制造平台，在资本运作等领域密切合。
20230330	【汇源通信：控股股东所持公司全部股份被司法冻结】财联社3月30日电，汇源通信公告，公司近日收到控股股东广州蕙富骐骥投资合伙企业（有限合伙）和董事兼副总经理刘中一发来的《四川省成都市中级人民法院民事裁定书》。因控股股东广州蕙富骐骥投资合伙企业（有限合伙）所持公司全部股份被司法冻结，若后期被司法拍卖，将会对公司控制权稳定性产生重大影响。	20:00_x000D_ 【汇源通信：控股股东所持公司全部股份被司法冻结】财联社3月30日电，汇源通信公告，公司近日收到控股股东广州蕙富骐骥投资合伙企业（有限合伙）和董事兼副总经理刘中一发来的《四川省成都市中级人民法院民事裁定书》。因控股股东广州蕙富骐骥投资合伙企业（有限合伙）所持公司全部股份被司法冻结，若后期被司法拍卖，将会对公司控制权稳定性产生重大影响。
20230404	【午评：沪指涨0.24%站上3300点 数据安全概念股集体大涨】财联社4月4日电，市场早盘震荡分化，沪指站上3300点，创业板指跌近1%。盘面上，AI概念股走势分化，数据安全方向走强，安恒信息、美亚柏科涨超10%，人民网涨停；CPO概念股继续活跃，剑桥科技、华工科技涨停。芯片股盘中走强，源杰科技、全志科技、佰维存储等涨超10%。猪肉股开盘冲高，新五丰涨停，巨星农牧创历史新高。下跌方面，赛道股再度陷入调整，新能源车、光伏等方向领跌，拓普集团跌超8%，科士达跌超7%。总体上个股跌多涨少，两市超3500只个股下跌。沪深两市今日成交额8432亿，较上个交易日放量635亿。板块方面，大基金持股、CPO、猪肉、数据安全等板块涨幅居前，一体化压铸、钙钛矿电池、固态电池、储能等板块跌幅居前。截至上午收盘，沪指涨0.24%，深成指跌0.31%，创业板指跌0.88%。北向资金方面，其中沪股通早盘净流出3.9…	11:33:02_x000D_ 【午评：沪指涨0.24%站上3300点 数据安全概念股集体大涨】财联社4月4日电，市场早盘震荡分化，沪指站上3300点，创业板指跌近1%。盘面上，AI概念股走势分化，数据安全方向走强，安恒信息、美亚柏科涨超10%，人民网涨停；CPO概念股继续活跃，剑桥科技、华工科技涨停。芯片股盘中走强，源杰科技、全志科技、佰维存储等涨超10%。猪肉股开盘冲高，新五丰涨停，巨星农牧创历史新高。下跌方面，赛道股再度陷入调整，新能源车、光伏等方向领跌，拓普集团跌超8%，科士达跌超7%。总体上个股跌多涨少，两市超3500只个股下跌。沪深两市今日成交额8432亿，较上个交易日放量635亿。板块方面，大基金持股、CPO、猪肉、数据安全等板块涨幅居前，一体化压铸、钙钛矿电池、固态电池、储能等板块跌幅居前。截至上午收盘，沪指涨0.24%，深成指跌0.31%，创业板指跌0.88%。北向资金…
20230317	【长安汽车再次跟进“补贴潮” 最大优惠3.3万元】财联社3月17日电，继推出“购买深蓝SL03至高享受4.2万综合补贴”后，3月17日长安汽车再次官宣跟进“补贴潮”，CS75系列限时综合优惠至高3.3万元，包含现金直降1万元，至高权益补贴2.3万元；UNI-V限时综合优惠至高2.2万元，包含现金直降5000元，至高权益补贴1.7万元；刚刚推出的UNI-V 智电iDD也加入补贴阵营，限时综合优惠至高2.6万元，包含现金直降1万元和至高权益补贴1.6万元。	15:24_x000D_ 【长安汽车再次跟进“补贴潮” 最大优惠3.3万元】财联社3月17日电，继推出“购买深蓝SL03至高享受4.2万综合补贴”后，3月17日长安汽车再次官宣跟进“补贴潮”，CS75系列限时综合优惠至高3.3万元，包含现金直降1万元，至高权益补贴2.3万元；UNI-V限时综合优惠至高2.2万元，包含现金直降5000元，至高权益补贴1.7万元；刚刚推出的UNI-V 智电iDD也加入补贴阵营，限时综合优惠至高2.6万元，包含现金直降1万元和至高权益补贴1.6万元。
20230328	【顺丰控股：2022年净利同比增长44.62%】财联社3月28日电，顺丰控股公告，2022年净利润61.74亿元，同比增长44.62%，拟10派2.5元。	19:25_x000D_ 【顺丰控股：2022年净利同比增长44.62%】财联社3月28日电，顺丰控股公告，2022年净利润61.74亿元，同比增长44.62%，拟10派2.5元。
20230331	【午评：三大指数小幅上涨 ChatGPT概念股集体反弹】财联社3月31日电，市场早盘震荡反弹，三大指数均小幅上涨。盘面上，猪肉股开盘大涨，巨星农牧、新五丰、天域生态等涨超7%。中药股集体走强，佛慈制药涨停，太极集团涨超9%，九芝堂涨超7%。赛道股盘中一度反弹，传艺科技、宝明科技涨停。零售股表现活跃，三江购物4连板，新华百货涨停。影视股震荡走强，上海电影涨停续创新高。ChatGPT概念股探底回升迎来反弹，福石控股涨超10%，云从科技、拓尔思、昆仑万维涨超7%。整体上早盘市场热点较为散乱，轮动较快。下跌方面，半导体板块陷入调整，普冉股份、本川智能跌超6%。总体上个股涨多跌少，两市超3000只个股上涨。沪深两市今日成交额5487亿，较上个交易日缩量293亿。板块方面，猪肉、中药、教育、手机游戏等板块涨幅居前，CRO、半导体、消费电子、PCB等板块跌幅居前。截至上午收盘，沪指涨0.22%，深成指…	11:33_x000D_ 【午评：三大指数小幅上涨 ChatGPT概念股集体反弹】财联社3月31日电，市场早盘震荡反弹，三大指数均小幅上涨。盘面上，猪肉股开盘大涨，巨星农牧、新五丰、天域生态等涨超7%。中药股集体走强，佛慈制药涨停，太极集团涨超9%，九芝堂涨超7%。赛道股盘中一度反弹，传艺科技、宝明科技涨停。零售股表现活跃，三江购物4连板，新华百货涨停。影视股震荡走强，上海电影涨停续创新高。ChatGPT概念股探底回升迎来反弹，福石控股涨超10%，云从科技、拓尔思、昆仑万维涨超7%。整体上早盘市场热点较为散乱，轮动较快。下跌方面，半导体板块陷入调整，普冉股份、本川智能跌超6%。总体上个股涨多跌少，两市超3000只个股上涨。沪深两市今日成交额5487亿，较上个交易日缩量293亿。板块方面，猪肉、中药、教育、手机游戏等板块涨幅居前，CRO、半导体、消费电子、PCB等板块跌幅居前。截至上午收盘…
20230520	【近一周机构调研公司数量970多家 汇川技术获338家机构调研】财联社5月20日电，近一周机构调研公司数量有970多家。汇川技术成为近一周调研机构数量最多的股票之一，合计有338家机构调研了该公司，其中有99家海外机构。晶晨股份、中矿资源、通裕重工等个股也有百家以上机构调研。	20:42:46_x000D_ 【近一周机构调研公司数量970多家 汇川技术获338家机构调研】财联社5月20日电，近一周机构调研公司数量有970多家。汇川技术成为近一周调研机构数量最多的股票之一，合计有338家机构调研了该公司，其中有99家海外机构。晶晨股份、中矿资源、通裕重工等个股也有百家以上机构调研。
20230525	【第一共和银行倒闭前一银行家年收入3500万美元 让小摩的CEO戴蒙“自愧不如”】财联社5月25日电，第一共和银行因迎合美国加州和纽约的富裕客户而出名，以异常优惠的抵押贷款吸引了许多客户，也最终导致该行陷入绝境。这个体系也让第一共和银行的员工变得富有。据知情人士透露，这家总部位于旧金山的银行在倒闭前的鼎盛时期向几十名员工每人支付超过1000万美元的年薪。监管机构5月初接管了这家银行，并将其出售给摩根大通。一些员工因为办理住房贷款、吸纳存款和扩大财富管理投资组合而获得奖励。至少有一位未具名、非最高级别管理者的银行家去年总收入超过3,500万美元。这甚至超过了第一共和银行的新老板、执掌美国最大银行摩根大通17年的首席执行官杰米·戴蒙的收入。 (彭博)	23:42:24_x000D_ 【第一共和银行倒闭前一银行家年收入3500万美元 让小摩的CEO戴蒙“自愧不如”】财联社5月25日电，第一共和银行因迎合美国加州和纽约的富裕客户而出名，以异常优惠的抵押贷款吸引了许多客户，也最终导致该行陷入绝境。这个体系也让第一共和银行的员工变得富有。据知情人士透露，这家总部位于旧金山的银行在倒闭前的鼎盛时期向几十名员工每人支付超过1000万美元的年薪。监管机构5月初接管了这家银行，并将其出售给摩根大通。一些员工因为办理住房贷款、吸纳存款和扩大财富管理投资组合而获得奖励。至少有一位未具名、非最高级别管理者的银行家去年总收入超过3,500万美元。这甚至超过了第一共和银行的新老板、执掌美国最大银行摩根大通17年的首席执行官杰米·戴蒙的收入。 (彭博)
20230202	【主力资金监控：中国长城净买入超4亿元】财联社2月2日电，财联社星矿数据显示，今日早盘主力资金净流入航运、煤炭、医药生物等板块，净流出大金融、证券、有色金属等板块，其中净流出有色金属板块超48亿元。个股方面，中国长城涨停，主力资金净买入4.00亿元，科大讯飞、北方华创、视觉中国获主力资金净流入居前；东方财富遭净卖出超5亿元，中信证券、中航产融、歌尔股份主力资金净流出额居前。	10:56_x000D_ 【主力资金监控：中国长城净买入超4亿元】财联社2月2日电，财联社星矿数据显示，今日早盘主力资金净流入航运、煤炭、医药生物等板块，净流出大金融、证券、有色金属等板块，其中净流出有色金属板块超48亿元。个股方面，中国长城涨停，主力资金净买入4.00亿元，科大讯飞、北方华创、视觉中国获主力资金净流入居前；东方财富遭净卖出超5亿元，中信证券、中航产融、歌尔股份主力资金净流出额居前。
20230829	【工信部召开制造业企业第二次座谈会：聚焦新动能 加快塑造高质量发展新优势】财联社8月29日电，据“工信微报”消息，8月28日，工业和信息化部部长金壮龙主持召开制造业企业座谈会，了解新能源汽车、锂电池、光伏、生物医药、智能制造、新材料等行业发展情况，听取企业诉求及政策建议，帮助企业解决实际困难，研究塑造制造业高质量发展新优势的工作措施。会上，广汽集团、宁德时代、天合光能、北京海博思创、大连融科储能、中国生物、三一集团、南京埃斯顿、吉利控股、巨化集团、中信泰富特钢、徐工汉云等12家企业负责人作了重点发言，介绍企业经营和市场供需情况，交流行业技术发展趋势及带来的机遇和挑战，围绕培育壮大发展新动能、促进工业经济平稳增长等提出政策建议。金壮龙认真听取大家发言，对企业在新动能新赛道取得的成效给予充分肯定，并介绍了推进新型工业化、建设现代化产业体系的有关情况，表示工业和信息化部将进一步健全与制造业企业…	09:35:08_x000D_ 【工信部召开制造业企业第二次座谈会：聚焦新动能 加快塑造高质量发展新优势】财联社8月29日电，据“工信微报”消息，8月28日，工业和信息化部部长金壮龙主持召开制造业企业座谈会，了解新能源汽车、锂电池、光伏、生物医药、智能制造、新材料等行业发展情况，听取企业诉求及政策建议，帮助企业解决实际困难，研究塑造制造业高质量发展新优势的工作措施。会上，广汽集团、宁德时代、天合光能、北京海博思创、大连融科储能、中国生物、三一集团、南京埃斯顿、吉利控股、巨化集团、中信泰富特钢、徐工汉云等12家企业负责人作了重点发言，介绍企业经营和市场供需情况，交流行业技术发展趋势及带来的机遇和挑战，围绕培育壮大发展新动能、促进工业经济平稳增长等提出政策建议。金壮龙认真听取大家发言，对企业在新动能新赛道取得的成效给予充分肯定，并介绍了推进新型工业化、建设现代化产业体系的有关情况，表示工业和…
20230911	23:40 _x000D_ [[+_+]]_x000D_ 专享 专享_x000D_ 【电报解读】Dojo超级计算机或加速特斯拉人形机器人开发，这家企业拟与头部公司设立合资企业开展减速器相关业务，该头部企业已通过特斯拉一级供应商认证 解锁直达	23:40 _x000D_ [[+_+]]_x000D_ 专享 专享_x000D_ 【电报解读】Dojo超级计算机或加速特斯拉人形机器人开发，这家企业拟与头部公司设立合资企业开展减速器相关业务，该头部企业已通过特斯拉一级供应商认证 解锁直达>>
20230602	【威腾电气：拟3亿元投建年产2GWh储能集成制造项目】财联社6月2日电，威腾电气公告，公司拟与酒泉市工业和信息化局签订《投资合作协议》，拟通过全资子公司江苏威腾能源科技有限公司投资设立全资子公司甘肃腾能源科技有限公司，在酒泉市开展“年产2GWh储能集成制造项目”，预计项目总投资约3亿元。	15:49:51_x000D_ 【威腾电气：拟3亿元投建年产2GWh储能集成制造项目】财联社6月2日电，威腾电气公告，公司拟与酒泉市工业和信息化局签订《投资合作协议》，拟通过全资子公司江苏威腾能源科技有限公司投资设立全资子公司甘肃腾能源科技有限公司，在酒泉市开展“年产2GWh储能集成制造项目”，预计项目总投资约3亿元。
20230614	【瑞尔特：年产120万套智能卫浴产品项目处于待投产状态】财联社6月14日电，瑞尔特接待机构调研时表示，目前公司“年产120万套智能卫浴产品生产基地建设项目”新产线已实施完毕，处于待投产状态。公司现有的智能坐便器产能是60万套，上述新产线在今年能够投产，实际的产能释放进度还是要以市场需求为准。目前，智能坐便器在我国的渗透率仍处低位，在5%-10%的水平，相比较于日本接近90%和韩国约60%的渗透率，随着居民消费能力提升和消费理念的改变，国内智能坐便器未来市场前景广阔。	13:17:25_x000D_ 【瑞尔特：年产120万套智能卫浴产品项目处于待投产状态】财联社6月14日电，瑞尔特接待机构调研时表示，目前公司“年产120万套智能卫浴产品生产基地建设项目”新产线已实施完毕，处于待投产状态。公司现有的智能坐便器产能是60万套，上述新产线在今年能够投产，实际的产能释放进度还是要以市场需求为准。目前，智能坐便器在我国的渗透率仍处低位，在5%-10%的水平，相比较于日本接近90%和韩国约60%的渗透率，随着居民消费能力提升和消费理念的改变，国内智能坐便器未来市场前景广阔。
20230620	【创新新材：拟在越南开展3C消费电子型材等项目】财联社6月20日电，创新新材公告，拟在越南开展3C消费电子型材等项目，该项目由香港子公司拟在越南设立的全资子公司负责实施，计划投资总额13.67亿元。	15:36:13_x000D_ 【创新新材：拟在越南开展3C消费电子型材等项目】财联社6月20日电，创新新材公告，拟在越南开展3C消费电子型材等项目，该项目由香港子公司拟在越南设立的全资子公司负责实施，计划投资总额13.67亿元。
20230625	【海思科：降血脂药物HSK31679片临床试验获批】财联社6月25日电，海思科公告，公司于近日获得国家药品监督管理局药品审评中心下发的《药物临床试验批准通知书》，药品名称为HSK31679片，该药品是公司自主研发的一种高选择性甲状腺激素β受体(THR-β)激动剂，通过与甲状腺激素β受体结合，影响脂代谢过程中的关键步骤，起到降血脂和肝脏脂肪的作用。	16:54:51_x000D_ 【海思科：降血脂药物HSK31679片临床试验获批】财联社6月25日电，海思科公告，公司于近日获得国家药品监督管理局药品审评中心下发的《药物临床试验批准通知书》，药品名称为HSK31679片，该药品是公司自主研发的一种高选择性甲状腺激素β受体(THR-β)激动剂，通过与甲状腺激素β受体结合，影响脂代谢过程中的关键步骤，起到降血脂和肝脏脂肪的作用。
20230608	【腾景科技：公司部分精密光学元组件产品可应用于800G光模块当中】财联社6月8日电，腾景科技接受调研时称，公司部分精密光学元组件产品可应用于800G光模块当中，公司不断丰富和完善光通信领域的技术和产品，满足下游客户对于更长传输距离、更高带宽容量的升级需求。基于商业保密原则，涉及客户的具体信息公司不便回复，公司与客户业务合作情况请以公司披露的信息为准。	15:47:16_x000D_ 【腾景科技：公司部分精密光学元组件产品可应用于800G光模块当中】财联社6月8日电，腾景科技接受调研时称，公司部分精密光学元组件产品可应用于800G光模块当中，公司不断丰富和完善光通信领域的技术和产品，满足下游客户对于更长传输距离、更高带宽容量的升级需求。基于商业保密原则，涉及客户的具体信息公司不便回复，公司与客户业务合作情况请以公司披露的信息为准。
20230621	【美股热门科技股普遍走低】财联社6月21日电，美股热门科技股普遍走低，纳斯达克100指数现跌1.5%，AMD跌超6%，特斯拉跌超5%，Tower半导体跌超4%，英伟达跌超3%，英特尔、谷歌、高通跌超2%，苹果、微软、Meta均跌超1%。	23:18:50_x000D_ 【美股热门科技股普遍走低】财联社6月21日电，美股热门科技股普遍走低，纳斯达克100指数现跌1.5%，AMD跌超6%，特斯拉跌超5%，Tower半导体跌超4%，英伟达跌超3%，英特尔、谷歌、高通跌超2%，苹果、微软、Meta均跌超1%。
20230625	【康希诺：吸附无细胞百(组分)白破联合疫苗（6岁及以上人群用）临床试验获批】财联社6月25日电，康希诺公告，公司于近日收到国家药品监督管理局核准签发的关于吸附无细胞百(组分)白破联合疫苗(6岁及以上人群用)的《药物临床试验批准通知书》。该款疫苗适用于6岁及以上人群，为青少年及成人的百白破加强疫苗，主要发达国家已将该疫苗纳入常规的疫苗接种计划，但国内并无获批的青少年及成人用百白破加强疫苗，该产品若成功上市，将填补国内市场空白。	16:56:11_x000D_ 【康希诺：吸附无细胞百(组分)白破联合疫苗（6岁及以上人群用）临床试验获批】财联社6月25日电，康希诺公告，公司于近日收到国家药品监督管理局核准签发的关于吸附无细胞百(组分)白破联合疫苗(6岁及以上人群用)的《药物临床试验批准通知书》。该款疫苗适用于6岁及以上人群，为青少年及成人的百白破加强疫苗，主要发达国家已将该疫苗纳入常规的疫苗接种计划，但国内并无获批的青少年及成人用百白破加强疫苗，该产品若成功上市，将填补国内市场空白。
20230629	【中钢国际：获得民生银行15亿元综合授信】财联社6月29日电，中钢国际公告，近日，公司与中国民生银行股份有限公司北京分行签署了《综合授信合同》，民生银行以信用方式给予公司15亿元人民币综合授信，授信期限为一年，由公司及下属全资子公司中钢设备有限公司在授信期内共同循环使用。	15:52:56_x000D_ 【中钢国际：获得民生银行15亿元综合授信】财联社6月29日电，中钢国际公告，近日，公司与中国民生银行股份有限公司北京分行签署了《综合授信合同》，民生银行以信用方式给予公司15亿元人民币综合授信，授信期限为一年，由公司及下属全资子公司中钢设备有限公司在授信期内共同循环使用。
20230803	【摩根士丹利下调中国股票评级？国内公募反驳：投资理念、投资方法不同】财联社8月3日电，摩根士丹利分析师周三（昨日）在一份报告中称“下调中国股票评级，建议投资者获利了结”，引发市场关注。对此，国内多家公募表示，“掐架没用，大家投资理念、投资方法以及对市场的判断不一样。”7月底的重要会议进一步强化了政策底预期，国内外的金融经济环境也在发生积极变化，对权益资产可考虑在市场底部区域适度增加配置。另有接近大摩人士认为，该卖方报告是以分析师名义发布，不能代表其公司观点。（记者 闫军）	12:53:17_x000D_ 【摩根士丹利下调中国股票评级？国内公募反驳：投资理念、投资方法不同】财联社8月3日电，摩根士丹利分析师周三（昨日）在一份报告中称“下调中国股票评级，建议投资者获利了结”，引发市场关注。对此，国内多家公募表示，“掐架没用，大家投资理念、投资方法以及对市场的判断不一样。”7月底的重要会议进一步强化了政策底预期，国内外的金融经济环境也在发生积极变化，对权益资产可考虑在市场底部区域适度增加配置。另有接近大摩人士认为，该卖方报告是以分析师名义发布，不能代表其公司观点。（记者 闫军）
20230810	【两位股民因股票下跌网上抱怨 被上市公司告上法庭要求赔礼道歉赔偿损失】财联社8月10日电，因原告公司股票价格持续下跌，吕某、冯某等网友在以原告名称命名的股吧内发言，表达对原告公司股票价格的不满。原告认为，谢某、吕某、冯某在股吧内发表的“明天跌停，谁也跑不了”、“利空来袭，做好准备，开始俯冲”等十余条言论，是在捏造事实诽谤原告，同时还辱骂了公司实际控制人、法定代表人，炒作原告公司股票价格。原告还认为，某信息公司作为股吧的管理方，怠于履行合理的监管注意义务，也应承担责任。该上市公司遂诉至法院，要求各被告停止侵权、赔礼道歉并赔偿损失。经审理，嘉定法院判决上市公司败诉，股民的行为不构成侵权，被告某信息公司也不用承担责任。 (上观新闻)	12:36:46_x000D_ 【两位股民因股票下跌网上抱怨 被上市公司告上法庭要求赔礼道歉赔偿损失】财联社8月10日电，因原告公司股票价格持续下跌，吕某、冯某等网友在以原告名称命名的股吧内发言，表达对原告公司股票价格的不满。原告认为，谢某、吕某、冯某在股吧内发表的“明天跌停，谁也跑不了”、“利空来袭，做好准备，开始俯冲”等十余条言论，是在捏造事实诽谤原告，同时还辱骂了公司实际控制人、法定代表人，炒作原告公司股票价格。原告还认为，某信息公司作为股吧的管理方，怠于履行合理的监管注意义务，也应承担责任。该上市公司遂诉至法院，要求各被告停止侵权、赔礼道歉并赔偿损失。经审理，嘉定法院判决上市公司败诉，股民的行为不构成侵权，被告某信息公司也不用承担责任。 (上观新闻)
20230110	【中国驻韩国大使馆：暂停签发韩国公民赴华短期签证】财联社1月10日电，据中国驻韩国大使馆微信公号消息，根据国内指示，自即日起，中国驻韩国使领馆暂停签发韩国公民赴华访问、商务、旅游、就医、过境以及一般私人事务类短期签证。驻韩使馆表示，上述措施将视韩国对华歧视性入境限制措施取消情况再作调整。	12:19_x000D_ 【中国驻韩国大使馆：暂停签发韩国公民赴华短期签证】财联社1月10日电，据中国驻韩国大使馆微信公号消息，根据国内指示，自即日起，中国驻韩国使领馆暂停签发韩国公民赴华访问、商务、旅游、就医、过境以及一般私人事务类短期签证。驻韩使馆表示，上述措施将视韩国对华歧视性入境限制措施取消情况再作调整。
20230313	【拜登回应硅谷银行危机：美国人民和美国企业可以放心 他们的银行存款会在他们需要的时候出现】财联社3月13日电，硅谷银行爆雷影响正迅速蔓延，拜登当地时间12日晚发推就银行信任危机发声欲提振美国人信心。拜登先是转发美国《纽约时报》报道并发推称，“在我的指示下，耶伦部长和我的国家经济委员会主任与银行监管机构进行合作，以解决硅谷银行和签名银行的问题。我很高兴他们达成了保护工人、小企业、纳税人和我们金融体系的解决方案。”他随后继续称，“美国人民和美国企业可以放心，他们的银行存款会在他们需要的时候出现。”他还表示：“我坚定承诺，要让那些应该对这场混乱负责的人承担全部责任，并继续努力加强对大型银行的监督和监管，这样我们就不会再次陷入这种境地。” (环球网)	15:13_x000D_ 【拜登回应硅谷银行危机：美国人民和美国企业可以放心 他们的银行存款会在他们需要的时候出现】财联社3月13日电，硅谷银行爆雷影响正迅速蔓延，拜登当地时间12日晚发推就银行信任危机发声欲提振美国人信心。拜登先是转发美国《纽约时报》报道并发推称，“在我的指示下，耶伦部长和我的国家经济委员会主任与银行监管机构进行合作，以解决硅谷银行和签名银行的问题。我很高兴他们达成了保护工人、小企业、纳税人和我们金融体系的解决方案。”他随后继续称，“美国人民和美国企业可以放心，他们的银行存款会在他们需要的时候出现。”他还表示：“我坚定承诺，要让那些应该对这场混乱负责的人承担全部责任，并继续努力加强对大型银行的监督和监管，这样我们就不会再次陷入这种境地。” (环球网)
20230317	14:14 _x000D_ [[+_+]]_x000D_ 专享 专享_x000D_ 【盘中宝】构筑元宇宙中的“阿凡达”，这类产品有望成为GPT4下的杀手级应用，这家公司相关产品已接入ChatGPT等模型 解锁直达>>	14:14 _x000D_ [[+_+]]_x000D_ 专享 专享_x000D_ 【盘中宝】构筑元宇宙中的“阿凡达”，这类产品有望成为GPT4下的杀手级应用，这家公司相关产品已接入ChatGPT等模型 解锁直达>>
20230705	【福达合金：重组能否达成一致尚有不确定性】财联社7月5日电，福达合金公告，公司近期正和交易对方开曼铝业（三门峡）有限公司控股股东进行磋商，本次重组能否达成一致尚有不确定性，存在风险，公司将尽快公布进展情况。经公司自查，目前公司生产经营情况正常，日常经营情况未发生重大变化。	22:31:22_x000D_ 【福达合金：重组能否达成一致尚有不确定性】财联社7月5日电，福达合金公告，公司近期正和交易对方开曼铝业（三门峡）有限公司控股股东进行磋商，本次重组能否达成一致尚有不确定性，存在风险，公司将尽快公布进展情况。经公司自查，目前公司生产经营情况正常，日常经营情况未发生重大变化。
20230705	【路畅科技：上半年预亏1000万元-1500万元 同比转亏】财联社7月5日电，路畅科技发布业绩预告，预计2023年半年度归母净利亏损1000万元-1500万元，上年同期盈利271.86万元。报告期内，公司根据重大资产重组项目各中介机构的工作进度，对与企业合并相关的中介费用进行计提，增加管理费用657万元；全资子公司南阳畅丰新材料科技有限公司因下游市场低迷，售价持续下降，导致毛利率下降，净利润下降；公司加大汽车电子产品的研发投入，研发费用增加。	17:50:49_x000D_ 【路畅科技：上半年预亏1000万元-1500万元 同比转亏】财联社7月5日电，路畅科技发布业绩预告，预计2023年半年度归母净利亏损1000万元-1500万元，上年同期盈利271.86万元。报告期内，公司根据重大资产重组项目各中介机构的工作进度，对与企业合并相关的中介费用进行计提，增加管理费用657万元；全资子公司南阳畅丰新材料科技有限公司因下游市场低迷，售价持续下降，导致毛利率下降，净利润下降；公司加大汽车电子产品的研发投入，研发费用增加。
20230714	【*ST正邦：预计上半年净亏损18亿元-20亿元】财联社7月14日电，*ST正邦公告，预计上半年净亏损18亿元-20亿元，上年同期净亏损42.86亿元。报告期内，公司生猪出栏共计298.91万头，同比下降38.31%，商品猪销售均价14.02元/公斤，同比上升10.13%。	18:26:29_x000D_ 【*ST正邦：预计上半年净亏损18亿元-20亿元】财联社7月14日电，*ST正邦公告，预计上半年净亏损18亿元-20亿元，上年同期净亏损42.86亿元。报告期内，公司生猪出栏共计298.91万头，同比下降38.31%，商品猪销售均价14.02元/公斤，同比上升10.13%。
20230718	08:13 _x000D_ [[+_+]]_x000D_ 专享 专享_x000D_ 【点金互动易】3D打印+光刻机，全球独家开发的3D打印系统速度提升百倍，元器件间接应用于高端光刻机生产商的核心设备，这家公司固体激光系统改造业务实现突破 解	08:13 _x000D_ [[+_+]]_x000D_ 专享 专享_x000D_ 【点金互动易】3D打印+光刻机，全球独家开发的3D打印系统速度提升百倍，元器件间接应用于高端光刻机生产商的核心设备，这家公司固体激光系统改造业务实现突破 解锁直达>>
20230630	【咸亨国际：无人机相关产品及服务在公司整体营收占比非常小】财联社6月30日电，咸亨国际公告，公司无人机相关产品及服务在公司整体营收占比非常小。公司旗下涉及无人机业务的有航空研究院和航空自动化，主要负责给能源领域的相关用户提供无人机巡检服务。2022年，航空研究院和航空自动化的营业收入分别为1054.81万元和2779.49万元，分别占公司2022年度营业收入的0.50%和1.31%。	16:49:40_x000D_ 【咸亨国际：无人机相关产品及服务在公司整体营收占比非常小】财联社6月30日电，咸亨国际公告，公司无人机相关产品及服务在公司整体营收占比非常小。公司旗下涉及无人机业务的有航空研究院和航空自动化，主要负责给能源领域的相关用户提供无人机巡检服务。2022年，航空研究院和航空自动化的营业收入分别为1054.81万元和2779.49万元，分别占公司2022年度营业收入的0.50%和1.31%。
20230704	【彤程新材：股东拟减持不超1.68%公司股份】财联社7月4日电，彤程新材公告，持股15.13%的股东Virgin Holdings Limited拟通过集中竞价交易和/或大宗交易方式合计减持不超过1000万股，即不超过公司总股本的1.68%。	17:16:21_x000D_ 【彤程新材：股东拟减持不超1.68%公司股份】财联社7月4日电，彤程新材公告，持股15.13%的股东Virgin Holdings Limited拟通过集中竞价交易和/或大宗交易方式合计减持不超过1000万股，即不超过公司总股本的1.68%。
20230705	【森霸传感：盈贝投资拟减持不超过3%股份】财联社7月5日电，股东盈贝投资拟减持不超过810万股，即不超过公司总股本的3%。	18:44:15_x000D_ 【森霸传感：盈贝投资拟减持不超过3%股份】财联社7月5日电，股东盈贝投资拟减持不超过810万股，即不超过公司总股本的3%。
20230705	【胡锡进在老挝出差仍坚持炒股：称今天账面损失1051元 增持三股】财联社7月5日电，胡锡进在微博发文称，“老胡今天账面损失了1051元，我增持了三只股票，两只是补仓已持股票，一只是新购股票，它们今天都是跌了1%以上。这样一来我就有了五只个股，两只基金，持股金额达到了13万元。因为我正在老挝出差，没时间盯盘，是在北京时间下午1点45左右设的买入，三只股票买入价设的都比当时价格低了3分钱，我希望它们不成交，那表明它们的股价是往回返的，但收盘后刚刚看了一下，全成交了。”	16:02:13_x000D_ 【胡锡进在老挝出差仍坚持炒股：称今天账面损失1051元 增持三股】财联社7月5日电，胡锡进在微博发文称，“老胡今天账面损失了1051元，我增持了三只股票，两只是补仓已持股票，一只是新购股票，它们今天都是跌了1%以上。这样一来我就有了五只个股，两只基金，持股金额达到了13万元。因为我正在老挝出差，没时间盯盘，是在北京时间下午1点45左右设的买入，三只股票买入价设的都比当时价格低了3分钱，我希望它们不成交，那表明它们的股价是往回返的，但收盘后刚刚看了一下，全成交了。”
20230818	【中金：A股估值再度回落至历史相对低位 港股估值处于历史极端低位】财联社8月18日电，中金公司研报指出，A股市场估值再度回落至历史相对低位水平，港股估值处于历史极端低位。中小市值公司估值再度低于历史均值。外资重仓公司估值重新回到历史均值附近。多数行业的前向市盈率已经处于历史均值以下，其中，银行、煤炭、石油石化、有色金属、交通运输、公用事业、电力设备、通信、环保、美容护理、国防军工等板块的前向市盈率估值位于历史25分位数以下（2010年至今）。当前无风险利率接近去年10月底股市阶段底部时期位置，股票资产的相对吸引力回升。根据股息率和国债收益率测算的股债相对吸引力指数目前已经为116%，高于过去5年95%分位数，处于历史极端高位水平，权益类资产的相对性价比较高。按前向市盈率比较，A股市场估值在全球主要市场中明显偏低，港股估值也处于中等偏低位，全球投资性价比相对较高。	08:07:42_x000D_ 【中金：A股估值再度回落至历史相对低位 港股估值处于历史极端低位】财联社8月18日电，中金公司研报指出，A股市场估值再度回落至历史相对低位水平，港股估值处于历史极端低位。中小市值公司估值再度低于历史均值。外资重仓公司估值重新回到历史均值附近。多数行业的前向市盈率已经处于历史均值以下，其中，银行、煤炭、石油石化、有色金属、交通运输、公用事业、电力设备、通信、环保、美容护理、国防军工等板块的前向市盈率估值位于历史25分位数以下（2010年至今）。当前无风险利率接近去年10月底股市阶段底部时期位置，股票资产的相对吸引力回升。根据股息率和国债收益率测算的股债相对吸引力指数目前已经为116%，高于过去5年95%分位数，处于历史极端高位水平，权益类资产的相对性价比较高。按前向市盈率比较，A股市场估值在全球主要市场中明显偏低，港股估值也处于中等偏低位，全球投资性价比相对…
20230819	【中国铁建投资集团100亿元小公募债项目获上交所受理】财联社8月19日电，上交所公司债券项目信息平台显示，中国铁建投资集团有限公司100亿元小公募债项目状态更新为“已受理”，受理日期为2023年8月18日。根据募集说明书申报稿，本次债券的募集资金将用于偿还到期债务、补充流动资金、项目建设及运营、股权投资以及相关适用法律法规及/或监管机构允许的用途，具体用途根据公司资金需求情况确定。	19:24:02_x000D_ 【中国铁建投资集团100亿元小公募债项目获上交所受理】财联社8月19日电，上交所公司债券项目信息平台显示，中国铁建投资集团有限公司100亿元小公募债项目状态更新为“已受理”，受理日期为2023年8月18日。根据募集说明书申报稿，本次债券的募集资金将用于偿还到期债务、补充流动资金、项目建设及运营、股权投资以及相关适用法律法规及/或监管机构允许的用途，具体用途根据公司资金需求情况确定。
20230104	【华润三九：12月份产品增长速度可能没有市场预期那么大】财联社1月4日电，华润三九接受机构调研时表示，目前来看，公司四季度营收、利润基本保持前三季度态势。四季度通常是公司感冒品类销售旺季，12月份疫情放开后，对感冒及相关产品需求又进一步增长。处方药业务受集采等影响表现相对弱一点。具体品类方面，CHC业务中核心品类增长较好，感冒、止咳类药物需求量较大、订单充足，但由于生产有一定周期，外加目前公司相关产品产能已饱和，所以12月份产品增长速度可能没有市场预期那么大。儿科品类总体表现比较好，其中澳诺业务持续表现较好，四季度以来尤其十二月份，小儿感冒药也处于需求旺盛状态。四季度会存在部分审计调整因素，但预计四季度净利润表现较好。	20:17_x000D_ 【华润三九：12月份产品增长速度可能没有市场预期那么大】财联社1月4日电，华润三九接受机构调研时表示，目前来看，公司四季度营收、利润基本保持前三季度态势。四季度通常是公司感冒品类销售旺季，12月份疫情放开后，对感冒及相关产品需求又进一步增长。处方药业务受集采等影响表现相对弱一点。具体品类方面，CHC业务中核心品类增长较好，感冒、止咳类药物需求量较大、订单充足，但由于生产有一定周期，外加目前公司相关产品产能已饱和，所以12月份产品增长速度可能没有市场预期那么大。儿科品类总体表现比较好，其中澳诺业务持续表现较好，四季度以来尤其十二月份，小儿感冒药也处于需求旺盛状态。四季度会存在部分审计调整因素，但预计四季度净利润表现较好。
20230120	【粤电力Ａ：计划“十四五”期间新增新能源装机约1400万千瓦】财联社1月20日电，粤电力Ａ接受机构调研时表示，公司初步计划“十四五”期间新建并投产煤电装机约800万千瓦、气电装机约1000万千瓦，新增新能源装机约1400万千瓦，其中陆上风电约160万千瓦、海上风电约280万千瓦、光伏约960万千瓦。目前公司在建煤电200万千瓦，拟开工建设的煤电600万千瓦，在建气电约545.6万千瓦，在建新能源约331.55万千瓦。上述计划装机规模及发电类型将根据项目核准备案及投资开发的实际情况确定，具体实施存在一定的调整空间。截至2022年末，公司共计拥有风电、光伏等新能源装机约252.14万千瓦。	14:59_x000D_ 【粤电力Ａ：计划“十四五”期间新增新能源装机约1400万千瓦】财联社1月20日电，粤电力Ａ接受机构调研时表示，公司初步计划“十四五”期间新建并投产煤电装机约800万千瓦、气电装机约1000万千瓦，新增新能源装机约1400万千瓦，其中陆上风电约160万千瓦、海上风电约280万千瓦、光伏约960万千瓦。目前公司在建煤电200万千瓦，拟开工建设的煤电600万千瓦，在建气电约545.6万千瓦，在建新能源约331.55万千瓦。上述计划装机规模及发电类型将根据项目核准备案及投资开发的实际情况确定，具体实施存在一定的调整空间。截至2022年末，公司共计拥有风电、光伏等新能源装机约252.14万千瓦。
20230309	【拜登将敦促对亿万富豪征25％最低所得税】财联社3月9日电，拜登将呼吁25%富豪税，向富有投资者征收重税；拜登的预算计划将把投资资本利得税税率从20%提高至39.6%，提高企业和美国富有人群的所得税税率。 (彭博)	08:35_x000D_ 【拜登将敦促对亿万富豪征25％最低所得税】财联社3月9日电，拜登将呼吁25%富豪税，向富有投资者征收重税；拜登的预算计划将把投资资本利得税税率从20%提高至39.6%，提高企业和美国富有人群的所得税税率。 (彭博)
20230309	【拜登据称将建议对亿万富豪征税25% 并大举提高对富裕投资者的征税】财联社3月9日电，美国总统拜登将在最新预算案中提出一系列针对亿万富豪、富裕投资者和企业的加税方案。据一位白宫知情官员透露，定于周四公布的预算案，将向国会提出对亿万富豪至少征税25%。建议还要求把投资的资本利得税率从20%提高近一倍，至39.6%，并提高对企业和富裕人士的所得税。 (彭博)	08:35_x000D_ 【拜登据称将建议对亿万富豪征税25% 并大举提高对富裕投资者的征税】财联社3月9日电，美国总统拜登将在最新预算案中提出一系列针对亿万富豪、富裕投资者和企业的加税方案。据一位白宫知情官员透露，定于周四公布的预算案，将向国会提出对亿万富豪至少征税25%。建议还要求把投资的资本利得税率从20%提高近一倍，至39.6%，并提高对企业和富裕人士的所得税。 (彭博)
20230316	【中信证券：预计3月和5月美联储议息会议各加息25bps】财联社3月16日电，中信证券认为，美国2月通胀读数总体继续回落且基本符合预期，但核心CPI环比继续走强且超预期。美国通胀下行趋势不改，但核心通胀仍显较强黏性，美联储政策或难因硅谷银行风险事件而就此转向。基准情形下，预计3月和5月议息会议各加息25bps。建议警惕美国市场资产价格在“风险+降息”与“通胀+加息”预期摇摆下的大幅波动，待硅谷银行风险事件明了以及市场主线逐渐清晰后再配置。	08:22_x000D_ 【中信证券：预计3月和5月美联储议息会议各加息25bps】财联社3月16日电，中信证券认为，美国2月通胀读数总体继续回落且基本符合预期，但核心CPI环比继续走强且超预期。美国通胀下行趋势不改，但核心通胀仍显较强黏性，美联储政策或难因硅谷银行风险事件而就此转向。基准情形下，预计3月和5月议息会议各加息25bps。建议警惕美国市场资产价格在“风险+降息”与“通胀+加息”预期摇摆下的大幅波动，待硅谷银行风险事件明了以及市场主线逐渐清晰后再配置。
20230330	【吉比特：2022年净利润同比下降0.52%】财联社3月30日电，吉比特公告，2022年净利润14.6亿元，同比下降0.52%，拟10派30元。	15:40_x000D_ 【吉比特：2022年净利润同比下降0.52%】财联社3月30日电，吉比特公告，2022年净利润14.6亿元，同比下降0.52%，拟10派30元。
20230828	【国药一致：上半年净利润8.3亿元 同比增23.14%】财联社8月28日电，国药一致披露半年度报告，公司2023年半年度实现营业收入为383.88亿元，同比增长6.25%；归母净利润8.3亿元，同比增长23.14%；基本每股收益1.49元。	20:25:18_x000D_ 【国药一致：上半年净利润8.3亿元 同比增23.14%】财联社8月28日电，国药一致披露半年度报告，公司2023年半年度实现营业收入为383.88亿元，同比增长6.25%；归母净利润8.3亿元，同比增长23.14%；基本每股收益1.49元。
20230911	【午评：三大股指小幅收高 医药股集体大涨】财联社9月11日电，市场早盘震荡攀升，三大指数均小幅收高。盘面上，华为产业链延续活跃，其中星闪概念强势，捷荣技术走出9天8板，冠石科技4连板，荣联科技、创耀科技等涨停。医药股集体大涨，创新药、减肥药方向领涨，常山药业、通化金马、灵康药业涨停。光刻机板块继续活跃，奥普光电、联合精密、张江高科涨停。智能驾驶板块震荡走高，锐明技术、德迈仕、亚太股份涨停。下跌方面，房地产及家居产业链调整，爱丽家居跌停，菲林格尔、亚振家居、栖霞建设跌超8%。总体上个股涨多跌少，两市超3300只个股数上涨。沪深两市今日成交额4899亿，较上个交易日放量849亿。板块方面，华为·星闪、减肥药、创新药、BC电池等板块涨幅居前，MLOps、太空互联网、建筑装饰、面板等板块跌幅居前。截至收盘，沪指涨0.57%，深成指涨0.44%，创业板指涨0.22%。北向资金方面，沪股通早盘净流入…	11:32:04_x000D_ 【午评：三大股指小幅收高 医药股集体大涨】财联社9月11日电，市场早盘震荡攀升，三大指数均小幅收高。盘面上，华为产业链延续活跃，其中星闪概念强势，捷荣技术走出9天8板，冠石科技4连板，荣联科技、创耀科技等涨停。医药股集体大涨，创新药、减肥药方向领涨，常山药业、通化金马、灵康药业涨停。光刻机板块继续活跃，奥普光电、联合精密、张江高科涨停。智能驾驶板块震荡走高，锐明技术、德迈仕、亚太股份涨停。下跌方面，房地产及家居产业链调整，爱丽家居跌停，菲林格尔、亚振家居、栖霞建设跌超8%。总体上个股涨多跌少，两市超3300只个股数上涨。沪深两市今日成交额4899亿，较上个交易日放量849亿。板块方面，华为·星闪、减肥药、创新药、BC电池等板块涨幅居前，MLOps、太空互联网、建筑装饰、面板等板块跌幅居前。截至收盘，沪指涨0.57%，深成指涨0.44%，创业板指涨0.22%…
20230516	21:19 _x000D_ [[+_+]]_x000D_ 专享 专享_x000D_ 【财联社早知道】2023年存储芯片单价有望止跌回升，行业拐点或已现，这家公司从事封装与测试，是国内存储芯片行业唯一具有竞争力的公司 解锁直达>>	21:19 _x000D_ [[+_+]]_x000D_ 专享 专享_x000D_ 【财联社早知道】2023年存储芯片单价有望止跌回升，行业拐点或已现，这家公司从事封装与测试，是国内存储芯片行业唯一具有竞争力的公司 解锁直达>>
20230526	【首只！银行理财公募“不赚钱不收管理费”】财联社5月26日电，近日，招银理财发行的招卓价值精选权益类理财计划产品（类公募基金）打破了常规的不论涨跌固定收费模式，规定产品累计净值低于1.00元（不含）时，暂停收取管理费，等回到1元后再恢复收取。根据公开信息，该产品首次投资最低金额为100元，发行规模下限200万元，上限15亿元。值得一提的是，这一产品在5月30日成立后有6个月的封闭期，在封闭期内只能申购不能赎回。（记者 沈述红）	10:47:57_x000D_ 【首只！银行理财公募“不赚钱不收管理费”】财联社5月26日电，近日，招银理财发行的招卓价值精选权益类理财计划产品（类公募基金）打破了常规的不论涨跌固定收费模式，规定产品累计净值低于1.00元（不含）时，暂停收取管理费，等回到1元后再恢复收取。根据公开信息，该产品首次投资最低金额为100元，发行规模下限200万元，上限15亿元。值得一提的是，这一产品在5月30日成立后有6个月的封闭期，在封闭期内只能申购不能赎回。（记者 沈述红）
20230526	13:46 _x000D_ [[+_+]]_x000D_ 专享 专享_x000D_ 【风口研报·公司】光刻胶+CMP研磨液+先进封装材料，这家公司成功切入3D NAND存储芯片先进制程打破海外垄断，光刻胶多线研发已获小批量连续订单 解锁直达	13:46 _x000D_ [[+_+]]_x000D_ 专享 专享_x000D_ 【风口研报·公司】光刻胶+CMP研磨液+先进封装材料，这家公司成功切入3D NAND存储芯片先进制程打破海外垄断，光刻胶多线研发已获小批量连续订单 解锁直达>>
20230530	【三达膜：与虹港石化签署《虹港石化公用工程设施项目污水处理场合同》】财联社5月30日电，三达膜公告，与江苏虹港石化有限公司签署《虹港石化公用工程设施项目污水处理场合同》，合同总价为1.15亿元。	17:07:20_x000D_ 【三达膜：与虹港石化签署《虹港石化公用工程设施项目污水处理场合同》】财联社5月30日电，三达膜公告，与江苏虹港石化有限公司签署《虹港石化公用工程设施项目污水处理场合同》，合同总价为1.15亿元。
20230505	14:07 _x000D_ [[+_+]]_x000D_ 专享 专享_x000D_ 【盘中宝】AI领域下一个超级应用，这类产品具备天然的结合优势，有望成为核心载体，这家公司制造的AI相关产品已陆续出货 解锁直达>>	14:07 _x000D_ [[+_+]]_x000D_ 专享 专享_x000D_ 【盘中宝】AI领域下一个超级应用，这类产品具备天然的结合优势，有望成为核心载体，这家公司制造的AI相关产品已陆续出货 解锁直达>>
20230521	【美光公司在华销售的产品未通过网络安全审查】财联社5月21日电，日前，网络安全审查办公室依法对美光公司在华销售产品进行了网络安全审查。审查发现，美光公司产品存在较严重网络安全问题隐患，对我国关键信息基础设施供应链造成重大安全风险，影响我国国家安全。为此，网络安全审查办公室依法作出不予通过网络安全审查的结论。按照《网络安全法》等法律法规，我国内关键信息基础设施的运营者应停止采购美光公司产品。此次对美光公司产品进行网络安全审查，目的是防范产品网络安全问题危害国家关键信息基础设施安全，是维护国家安全的必要措施。中国坚定推进高水平对外开放，只要遵守中国法律法规要求，欢迎各国企业、各类平台产品服务进入中国市场。	20:02:12_x000D_ 【美光公司在华销售的产品未通过网络安全审查】财联社5月21日电，日前，网络安全审查办公室依法对美光公司在华销售产品进行了网络安全审查。审查发现，美光公司产品存在较严重网络安全问题隐患，对我国关键信息基础设施供应链造成重大安全风险，影响我国国家安全。为此，网络安全审查办公室依法作出不予通过网络安全审查的结论。按照《网络安全法》等法律法规，我国内关键信息基础设施的运营者应停止采购美光公司产品。_x000D_ _x000D_ _x000D_ _x000D_ 此次对美光公司产品进行网络安全审查，目的是防范产品网络安全问题危害国家关键信息基础设施安全，是维护国家安全的必要措施。中国坚定推进高水平对外开放，只要遵守中国法律法规要求，欢迎各国企业、各类平台产品服务进入中国市场。
20230525	【吉华集团：副董事长杨泉明拟减持公司不超0.32%股份】财联社5月25日电，吉华集团公告，副董事长杨泉明计划于2023年6月16日起6个月内，以集中竞价交易方式或大宗交易方式减持其所持有的公司股份，减持数量不超过225.5万股，即不超过公司总股本的0.32%，减持价格将由减持实施时的市场价格决定。	16:10:07_x000D_ 【吉华集团：副董事长杨泉明拟减持公司不超0.32%股份】财联社5月25日电，吉华集团公告，副董事长杨泉明计划于2023年6月16日起6个月内，以集中竞价交易方式或大宗交易方式减持其所持有的公司股份，减持数量不超过225.5万股，即不超过公司总股本的0.32%，减持价格将由减持实施时的市场价格决定。
20230817	【比亚迪储能：网传储能电站事故信息系恶意拼接的谣言】财联社8月17日电，比亚迪储能公众号发文称，有关于“比亚迪储能供货的宁夏银川锦洋绿储储能电站于2023年8月2日起火爆炸，造成多人伤亡”的图片、视频等消息在网络传播。经核实，该项目从未发生过起火、爆炸和人员死亡事故，网传信息系恶意拼接的谣言。目前，比亚迪储能已向公安机关报案，并依法取证，将保留追究有关侵权方责任的权利。	16:59:55_x000D_ 【比亚迪储能：网传储能电站事故信息系恶意拼接的谣言】财联社8月17日电，比亚迪储能公众号发文称，有关于“比亚迪储能供货的宁夏银川锦洋绿储储能电站于2023年8月2日起火爆炸，造成多人伤亡”的图片、视频等消息在网络传播。经核实，该项目从未发生过起火、爆炸和人员死亡事故，网传信息系恶意拼接的谣言。目前，比亚迪储能已向公安机关报案，并依法取证，将保留追究有关侵权方责任的权利。
20230817	【祥龙电业：上半年净利润666.74万元 同比增长13.62%】财联社8月17日电，祥龙电业公布2023年半年度报告，报告期实现营业收入3117.68万元，同比增长23%；归属于上市公司股东的净利润666.74万元，同比增长13.62%；归属于上市公司股东的扣除非经常性损益的净利润617.78万元，同比增长90.8%；基本每股收益0.0178元。	16:55:28_x000D_ 【祥龙电业：上半年净利润666.74万元 同比增长13.62%】财联社8月17日电，祥龙电业公布2023年半年度报告，报告期实现营业收入3117.68万元，同比增长23%；归属于上市公司股东的净利润666.74万元，同比增长13.62%；归属于上市公司股东的扣除非经常性损益的净利润617.78万元，同比增长90.8%；基本每股收益0.0178元。
20230820	【博菲电气：高度重视磁悬浮列车市场 做好了相关技术储备和产能规划】财联社8月20日电，博菲电气近日在互动平台上表示，公司高度重视磁悬浮列车市场，自主研发了磁悬浮直线电机灌注胶、超导磁浮地面线圈内框、磁悬浮直线电机罩、磁浮列车牵引导向8字线圈、中低速悬浮电磁铁磁极线圈浇注、中高速磁悬浮电机长定子部件等系列产品，并规划了10500套磁悬浮动力电机部件建设项目，做好了相关技术储备和产能规划。	13:31:56_x000D_ 【博菲电气：高度重视磁悬浮列车市场 做好了相关技术储备和产能规划】财联社8月20日电，博菲电气近日在互动平台上表示，公司高度重视磁悬浮列车市场，自主研发了磁悬浮直线电机灌注胶、超导磁浮地面线圈内框、磁悬浮直线电机罩、磁浮列车牵引导向8字线圈、中低速悬浮电磁铁磁极线圈浇注、中高速磁悬浮电机长定子部件等系列产品，并规划了10500套磁悬浮动力电机部件建设项目，做好了相关技术储备和产能规划。
20230414	【道道全：预计一季度净利9000万元-1.2亿元 同比扭亏】财联社4月14日电，道道全公告，预计2023年一季度净利润9000万元-1.2亿元，上年同期净利亏损5401.94万元。报告期内，随着茂名工厂2022年7月建成投产且产能释放，影响营业收入同比大幅增加；受供需关系趋向宽松，主要原材料价格下降，产品毛利率水平逐步回升到正常，导致公司2023年一季度业绩较去年同期有较大幅增长。	19:02:26_x000D_ 【道道全：预计一季度净利9000万元-1.2亿元 同比扭亏】财联社4月14日电，道道全公告，预计2023年一季度净利润9000万元-1.2亿元，上年同期净利亏损5401.94万元。报告期内，随着茂名工厂2022年7月建成投产且产能释放，影响营业收入同比大幅增加；受供需关系趋向宽松，主要原材料价格下降，产品毛利率水平逐步回升到正常，导致公司2023年一季度业绩较去年同期有较大幅增长。
20230217	09:14 _x000D_ [[+_+]]_x000D_ 专享 专享_x000D_ 【盘中宝】厂商酝酿涨价至6月份，这一行业周期或将反转在即，这家公司多个产品份额位居全球第一 解锁直达>>	09:14 _x000D_ [[+_+]]_x000D_ 专享 专享_x000D_ 【盘中宝】厂商酝酿涨价至6月份，这一行业周期或将反转在即，这家公司多个产品份额位居全球第一 解锁直达>>
20230428	【天原股份：与南溪政府签署战略合作框架协议】财联社4月28日电，天原股份公告，与南溪政府拟就下属子公司宜宾天蓝化工有限责任公司转型升级，对天蓝化工实施整体搬迁以及在南溪投资建设年产20万吨新能源正极材料项目达成意向性协议。	18:23:48_x000D_ 【天原股份：与南溪政府签署战略合作框架协议】财联社4月28日电，天原股份公告，与南溪政府拟就下属子公司宜宾天蓝化工有限责任公司转型升级，对天蓝化工实施整体搬迁以及在南溪投资建设年产20万吨新能源正极材料项目达成意向性协议。
20230503	20:40 _x000D_ [[+_+]]_x000D_ 专享 专享_x000D_ 【风口研报·公司】携手中科院研发AI+领跑开源华为鸿蒙生态政企市场，公司一季度业绩增近300%，分析师更看好海外业务有望继续成为新增长点；另外机构认为均衡布	20:40 _x000D_ [[+_+]]_x000D_ 专享 专享_x000D_ 【风口研报·公司】携手中科院研发AI+领跑开源华为鸿蒙生态政企市场，公司一季度业绩增近300%，分析师更看好海外业务有望继续成为新增长点；另外机构认为均衡布局，注意海外宏观波动风险 解锁直达>>
20230120	【中微半导：2022年净利同比预降91.72%】财联社1月20日电，中微半导公告，预计2022年净利润为6500万元左右，同比减少91.72%左右。受到国内疫情反复和宏观经济增速放缓等因素的影响，消费电子市场和家电市场需求不景气，公司今年营业收入和毛利率均有明显下降。2022年上半年声光电科股价下降，造成公司2022年度公允价值变动损益为-3220.28万元。	15:40_x000D_ 【中微半导：2022年净利同比预降91.72%】财联社1月20日电，中微半导公告，预计2022年净利润为6500万元左右，同比减少91.72%左右。受到国内疫情反复和宏观经济增速放缓等因素的影响，消费电子市场和家电市场需求不景气，公司今年营业收入和毛利率均有明显下降。2022年上半年声光电科股价下降，造成公司2022年度公允价值变动损益为-3220.28万元。
20230220	【久立特材：与久立建设签署5480万元工程施工合同】财联社2月20日电，久立特材公告，拟与控股股东久立集团全资子公司久立建设签署《浙江久立特材换热单元预制件建设项目工程施工合同补充合同》和《年产1000吨特种合金高精度超长管材项目工程施工合同》，涉及关联交易总金额为5480万元。	17:10_x000D_ 【久立特材：与久立建设签署5480万元工程施工合同】财联社2月20日电，久立特材公告，拟与控股股东久立集团全资子公司久立建设签署《浙江久立特材换热单元预制件建设项目工程施工合同补充合同》和《年产1000吨特种合金高精度超长管材项目工程施工合同》，涉及关联交易总金额为5480万元。
20230102	【中工国际：签署亚青会体育场馆项目EPC总承包商务合同】财联社1月2日电，中工国际公告，公司此前中标乌兹别克斯坦2025年第四届亚洲青年运动会奥林匹克城项目。2022年12月30日，中工国际与塔什干市政府统一业主服务工程公司签署了2025年塔什干第四届夏季亚洲青年运动会和第五届亚洲残疾人青年运动会现代体育场馆建设项目（一标段和二标段）EPC总承包商务合同。两个标段合同总金额为20.84亿元，为公司2021年营业总收入的24.12%。	16:48_x000D_ 【中工国际：签署亚青会体育场馆项目EPC总承包商务合同】财联社1月2日电，中工国际公告，公司此前中标乌兹别克斯坦2025年第四届亚洲青年运动会奥林匹克城项目。2022年12月30日，中工国际与塔什干市政府统一业主服务工程公司签署了2025年塔什干第四届夏季亚洲青年运动会和第五届亚洲残疾人青年运动会现代体育场馆建设项目（一标段和二标段）EPC总承包商务合同。两个标段合同总金额为20.84亿元，为公司2021年营业总收入的24.12%。
20230511	【广发证券：本轮银行行情远未结束】财联社5月11日电，广发证券研报表示，目前银行估值仍在低位，股息率仍在高位，银行板块交易集中度仍低，结合基本面、资金面、政策面和社会预期面趋势，这将是一轮银行板块系统性估值修复机会。虽然部分投资者出现止盈担忧，但我们认为本轮银行行情远未结束。这轮行情中，有些银行是周期共振、有些银行是困境反转、有些银行是长期战略溢价再回归。目前周期共振行情正在演绎，困境反转行情刚刚启动，长期战略溢价再回归行情尚未到来。行情可能有先后，但最终都会演绎，我们继续看好银行板块绝对和相对收益行情。	08:25:00_x000D_ 【广发证券：本轮银行行情远未结束】财联社5月11日电，广发证券研报表示，目前银行估值仍在低位，股息率仍在高位，银行板块交易集中度仍低，结合基本面、资金面、政策面和社会预期面趋势，这将是一轮银行板块系统性估值修复机会。虽然部分投资者出现止盈担忧，但我们认为本轮银行行情远未结束。这轮行情中，有些银行是周期共振、有些银行是困境反转、有些银行是长期战略溢价再回归。目前周期共振行情正在演绎，困境反转行情刚刚启动，长期战略溢价再回归行情尚未到来。行情可能有先后，但最终都会演绎，我们继续看好银行板块绝对和相对收益行情。
20230524	【博通集成：尚未有BCI脑机接口领域的芯片产品】财联社5月24日电，博通集成在互动平台表示，公司的低功蓝牙和Wi-Fi芯片主要应用于物联网和智慧交通领域，公司尚未有BCI脑机接口领域的芯片产品。	09:33:10_x000D_ 【博通集成：尚未有BCI脑机接口领域的芯片产品】财联社5月24日电，博通集成在互动平台表示，公司的低功蓝牙和Wi-Fi芯片主要应用于物联网和智慧交通领域，公司尚未有BCI脑机接口领域的芯片产品。
20230525	【万达集团：网传“160亿销售20个万达广场”为不实消息】财联社5月25日电，万达集团在官网发布声明称，网传“160亿销售20个万达广场”为不实消息。此前媒体报道称，大连万达集团目前正考虑出售旗下20个商业中心，这些商业中心基本为重资产，目前的估值在每家7亿元至8亿元。目前接触的潜在买家为保险公司和资管机构。	08:53:50_x000D_ 【万达集团：网传“160亿销售20个万达广场”为不实消息】财联社5月25日电，万达集团在官网发布声明称，网传“160亿销售20个万达广场”为不实消息。此前媒体报道称，大连万达集团目前正考虑出售旗下20个商业中心，这些商业中心基本为重资产，目前的估值在每家7亿元至8亿元。目前接触的潜在买家为保险公司和资管机构。
20230512	【午评：沪指冲高回落失守3300点 AI应用方向集体调整】财联社5月12日电，市场早盘震荡调整，沪指失守3300点。盘面上，服装股开盘大涨，红蜻蜓、七匹狼、九牧王等涨停。医药股集体走强，金石亚药涨超10%，海南海药、津药药业涨停。电力股一度冲高，粤电力A涨停，华电国际涨超8%。CPO、算力概念股展开反弹，联特科技涨超10%，剑桥科技涨超7%。下跌方面，AI应用方向集体调整，浙数文化跌停，天娱数科跌超9%。一带一路概念股继续调整，设计总院跌停，中船科技跌超9%。总体上个股跌多涨少，两市超3000只个下跌。沪深两市今日成交额5462亿，较上个交易日缩量367亿。板块方面，服装纺织、中药、电商、新冠药等板块涨幅居前，手机游戏、传媒、贵金属、数据要素等板块跌幅居前。截至上午收盘，沪指跌0.4%，深成指跌0.47%，创业板指跌0.11%。北向资金方面，其中沪股通早盘净流入2.81亿，深股通早盘净流…	11:32:14_x000D_ 【午评：沪指冲高回落失守3300点 AI应用方向集体调整】财联社5月12日电，市场早盘震荡调整，沪指失守3300点。盘面上，服装股开盘大涨，红蜻蜓、七匹狼、九牧王等涨停。医药股集体走强，金石亚药涨超10%，海南海药、津药药业涨停。电力股一度冲高，粤电力A涨停，华电国际涨超8%。CPO、算力概念股展开反弹，联特科技涨超10%，剑桥科技涨超7%。下跌方面，AI应用方向集体调整，浙数文化跌停，天娱数科跌超9%。一带一路概念股继续调整，设计总院跌停，中船科技跌超9%。总体上个股跌多涨少，两市超3000只个下跌。沪深两市今日成交额5462亿，较上个交易日缩量367亿。板块方面，服装纺织、中药、电商、新冠药等板块涨幅居前，手机游戏、传媒、贵金属、数据要素等板块跌幅居前。截至上午收盘，沪指跌0.4%，深成指跌0.47%，创业板指跌0.11%。北向资金方面，其中沪股通早盘…
20230516	【隆基绿能：在美国合资建设5GW组件工厂预计今年底或明年年初投产】财联社5月16日电，隆基绿能在互动平台表示，公司在美国合资建设5GW组件工厂，预计今年底或明年年初投产。	17:19:27_x000D_ 【隆基绿能：在美国合资建设5GW组件工厂预计今年底或明年年初投产】财联社5月16日电，隆基绿能在互动平台表示，公司在美国合资建设5GW组件工厂，预计今年底或明年年初投产。
20230802	【郭明錤：常温常压超导体若能顺利商业化 将对计算器与消费电子领域的产品设计有颠覆性的影响】财联社8月2日电，分析师郭明錤认为，常温常压超导体商业化的时程并没有任何能见度，但未来若能够顺利商业化，将对计算器与消费电子领域的产品设计有颠覆性的影响。计算器与消费电子的技术与材料创新，都是为了要实现高速运算、高频高速传输、小型化等要求，而超导状况 (电阻消失) 特性将会颠覆既有的产品设计与材料/技术采用，如：不再需要散热系统、光纤/高阶CCL被取代、先进制程门坎降低等，让即便是小如iPhone的行动装置，都能拥有与量子计算机匹敌的运算能力。	07:59:20_x000D_ 【郭明錤：常温常压超导体若能顺利商业化 将对计算器与消费电子领域的产品设计有颠覆性的影响】财联社8月2日电，分析师郭明錤认为，常温常压超导体商业化的时程并没有任何能见度，但未来若能够顺利商业化，将对计算器与消费电子领域的产品设计有颠覆性的影响。计算器与消费电子的技术与材料创新，都是为了要实现高速运算、高频高速传输、小型化等要求，而超导状况 (电阻消失) 特性将会颠覆既有的产品设计与材料/技术采用，如：不再需要散热系统、光纤/高阶CCL被取代、先进制程门坎降低等，让即便是小如iPhone的行动装置，都能拥有与量子计算机匹敌的运算能力。
20230810	【东方盛虹：上半年净利同比增3.21%至16.80亿元】财联社8月10日电，东方盛虹公布2023年半年度报告，报告期营业收入658.999亿元，同比增长117.91%；归属于上市公司股东的净利润16.80亿元，同比增长3.21%；归属于上市公司股东的扣除非经常性损益的净利润15.597亿元，同比下降2.27%；基本每股收益0.25元。	17:09:56_x000D_ 【东方盛虹：上半年净利同比增3.21%至16.80亿元】财联社8月10日电，东方盛虹公布2023年半年度报告，报告期营业收入658.999亿元，同比增长117.91%；归属于上市公司股东的净利润16.80亿元，同比增长3.21%；归属于上市公司股东的扣除非经常性损益的净利润15.597亿元，同比下降2.27%；基本每股收益0.25元。
20230821	【昂立教育：上半年净利润亏损约1.08亿元】财联社8月21日电，昂立教育公告，上半年实现营业收入约4.07亿元，同比增长17.42%；净利润亏损约1.08亿元，去年同期盈利约6242.35万元。	18:23:29_x000D_ 【昂立教育：上半年净利润亏损约1.08亿元】财联社8月21日电，昂立教育公告，上半年实现营业收入约4.07亿元，同比增长17.42%；净利润亏损约1.08亿元，去年同期盈利约6242.35万元。
20230329	【巴安水务：股东山东高创与张春霖已达成一致 力求尽快恢复公司正常经营】财联社3月29日电，巴安水务回复关注函称，股东山东高创与张春霖的前期矛盾主要因双方对《合作框架协议》及其补充协议的理解不一致，导致产生关于公司第五届董事会换届选举的股东大会决议的诉讼纠纷，但双方现已达成一致，以恢复巴安水务正常生产经营为首要任务，双方股东全力支持公司此次董事、监事补选以及公司日后经营，力求尽快恢复公司正常经营。	17:33_x000D_ 【巴安水务：股东山东高创与张春霖已达成一致 力求尽快恢复公司正常经营】财联社3月29日电，巴安水务回复关注函称，股东山东高创与张春霖的前期矛盾主要因双方对《合作框架协议》及其补充协议的理解不一致，导致产生关于公司第五届董事会换届选举的股东大会决议的诉讼纠纷，但双方现已达成一致，以恢复巴安水务正常生产经营为首要任务，双方股东全力支持公司此次董事、监事补选以及公司日后经营，力求尽快恢复公司正常经营。
20230114	【一汽解放与新疆能源重工签署采购框架协议】财联社1月14日电，据一汽解放消息，1月14日，一汽解放汽车有限公司与新疆能源重工科创有限责任公司在长春签署1000辆采购框架协议，全面深化战略合作伙伴关系。此次签约，双方将进一步整合各自资源优势，构建起全面、长期和稳定的战略合作伙伴关系，在车辆采购、整车物流服务、智慧物流平台建设、推进智能网联合作及数据共享等多领域开展全方位战略合作。	20:57_x000D_ 【一汽解放与新疆能源重工签署采购框架协议】财联社1月14日电，据一汽解放消息，1月14日，一汽解放汽车有限公司与新疆能源重工科创有限责任公司在长春签署1000辆采购框架协议，全面深化战略合作伙伴关系。此次签约，双方将进一步整合各自资源优势，构建起全面、长期和稳定的战略合作伙伴关系，在车辆采购、整车物流服务、智慧物流平台建设、推进智能网联合作及数据共享等多领域开展全方位战略合作。
20230409	【梅花生物：拟8亿元-10亿元回购股份】财联社4月9日电，梅花生物公告，拟回购股份用于注销减少注册资本，回购资金总额8亿元-10亿元，回购价格不超过12元/股。	15:59:59_x000D_ 【梅花生物：拟8亿元-10亿元回购股份】财联社4月9日电，梅花生物公告，拟回购股份用于注销减少注册资本，回购资金总额8亿元-10亿元，回购价格不超过12元/股。
20230522	【中兰环保：深创投及其关联方拟减持不超5%公司股份】财联社5月22日电，中兰环保公告，股东深创投及其关联方拟减持不超过5%的公司股份。	18:51:02_x000D_ 【中兰环保：深创投及其关联方拟减持不超5%公司股份】财联社5月22日电，中兰环保公告，股东深创投及其关联方拟减持不超过5%的公司股份。
20230529	【午评：创业板指跌超1%再创调整新低 新能源赛道股持续走弱】财联社5月29日电，市场早盘震荡分化，三大指数涨跌不一，创业板指跌超1%再创调整新低。盘面上，AI概念股继续活跃，CPO方向领涨，东田微、金百泽20CM涨停；游戏股盘中拉升，顺网科技20CM涨停，姚记科技、巨人网络涨停。电力股震荡走强，桂东电力、恒盛能源、天富能源涨停。脑机接口概念股开盘大涨，爱朋医疗20CM涨停，新智认知、创新医疗涨停。下跌方面，新能源赛道股持续走弱，天合光能跌超10%，派能科技、钧达股份等跌超5%。总体上个股跌多涨少，两市超3000只个下跌。沪深两市今日成交额6014亿，较上个交易日放量992亿。板块方面，脑机接口、CPO、游戏、电力等板块涨幅居前，一体化压铸、HJT电池、汽车整车、电商等板块跌幅居前。截至上午收盘，沪指涨0.15%，深成指跌0.82%，创业板指跌1.18%。北向资金方面，其中沪股通早盘净流入…	11:33:16_x000D_ 【午评：创业板指跌超1%再创调整新低 新能源赛道股持续走弱】财联社5月29日电，市场早盘震荡分化，三大指数涨跌不一，创业板指跌超1%再创调整新低。盘面上，AI概念股继续活跃，CPO方向领涨，东田微、金百泽20CM涨停；游戏股盘中拉升，顺网科技20CM涨停，姚记科技、巨人网络涨停。电力股震荡走强，桂东电力、恒盛能源、天富能源涨停。脑机接口概念股开盘大涨，爱朋医疗20CM涨停，新智认知、创新医疗涨停。下跌方面，新能源赛道股持续走弱，天合光能跌超10%，派能科技、钧达股份等跌超5%。总体上个股跌多涨少，两市超3000只个下跌。沪深两市今日成交额6014亿，较上个交易日放量992亿。板块方面，脑机接口、CPO、游戏、电力等板块涨幅居前，一体化压铸、HJT电池、汽车整车、电商等板块跌幅居前。截至上午收盘，沪指涨0.15%，深成指跌0.82%，创业板指跌1.18%。北…
20230702	20:16 _x000D_ [[+_+]]_x000D_ 专享 专享_x000D_ 【风口研报·公司】光模块铌酸锂上游“卡脖子”材料，这家公司打破海外垄断实现批量供货、定增完成扩建420万片产能，受益于SAW滤波器+光芯片国产化加速；周策略	20:16 _x000D_ [[+_+]]_x000D_ 专享 专享_x000D_ 【风口研报·公司】光模块铌酸锂上游“卡脖子”材料，这家公司打破海外垄断实现批量供货、定增完成扩建420万片产能，受益于SAW滤波器+光芯片国产化加速；周策略：7月反弹预期提升，或迎来去年底弱化版修复 解锁直达>>
20230704	【苏丹首都圈地区冲突加剧 苏丹武装部队意图切断快速支援部队补给线】财联社7月4日电，苏丹武装部队与快速支援部队当地时间7月4日在首都喀土穆市及其周边的北喀土穆市、恩图曼市组成的首都圈地区冲突继续扩大，双方使用重炮、火箭炮等武器装备相互攻击。苏丹武装部队还多次出动战机轰炸快速支援部队目标，快速支援部队则使用防空火炮和导弹予以反击，并声称于当天击落一架苏丹武装部队的米格战机。苏丹武装部队尚未对此作出回应。恩图曼市的安全局势最为紧张，该市位于快速支援部队从苏丹西部达尔富尔向首都圈输送兵力和武器装备的补给线上。苏丹武装部队近日动用特种部队在该市展开大规模行动，意图切断快速支援部队的补给线，双方激战已持续数日。当地居民表示，战况达到近几周以来最激烈的程度。	23:47:22_x000D_ 【苏丹首都圈地区冲突加剧 苏丹武装部队意图切断快速支援部队补给线】财联社7月4日电，苏丹武装部队与快速支援部队当地时间7月4日在首都喀土穆市及其周边的北喀土穆市、恩图曼市组成的首都圈地区冲突继续扩大，双方使用重炮、火箭炮等武器装备相互攻击。苏丹武装部队还多次出动战机轰炸快速支援部队目标，快速支援部队则使用防空火炮和导弹予以反击，并声称于当天击落一架苏丹武装部队的米格战机。苏丹武装部队尚未对此作出回应。恩图曼市的安全局势最为紧张，该市位于快速支援部队从苏丹西部达尔富尔向首都圈输送兵力和武器装备的补给线上。苏丹武装部队近日动用特种部队在该市展开大规模行动，意图切断快速支援部队的补给线，双方激战已持续数日。当地居民表示，战况达到近几周以来最激烈的程度。
20230710	【力合微：上半年净利同比预增57.52%至66.97%】财联社7月10日电，力合微公告，预计上半年净利润5,000万元至5,300万元，同比增长57.52%至66.97%；电网市场持续增长，公司订单充足，对比上年同期在手订单增长50%以上，同时智慧光伏、智能家居等芯片项目也有序推进。	15:45:50_x000D_ 【力合微：上半年净利同比预增57.52%至66.97%】财联社7月10日电，力合微公告，预计上半年净利润5,000万元至5,300万元，同比增长57.52%至66.97%；电网市场持续增长，公司订单充足，对比上年同期在手订单增长50%以上，同时智慧光伏、智能家居等芯片项目也有序推进。
20230720	11:38 _x000D_ [[+_+]]_x000D_ 专享 专享_x000D_ 【大佬持仓跟踪】先进封装+无人驾驶+芯片，工艺可推广至2.5D、3D晶圆级先进集成封装平台，向百度提供无人驾驶产品，这家公司细分芯片营收全球第一 解锁直达>	11:38 _x000D_ [[+_+]]_x000D_ 专享 专享_x000D_ 【大佬持仓跟踪】先进封装+无人驾驶+芯片，工艺可推广至2.5D、3D晶圆级先进集成封装平台，向百度提供无人驾驶产品，这家公司细分芯片营收全球第一 解锁直达>>
20230722	【中国中车召开加快建设世界一流中车“四大行动”统筹推进会】财联社7月22日电，中国中车以“现场+视频”形式召开加快建设世界一流中车“四大行动”统筹推进会。国务院国资委企业改革局二级巡视员王健指出，中国中车是我国轨道交通装备领军企业，是国务院国资委遴选的首批创建世界一流示范企业。前期，中国中车勇当“主力军”“排头兵”，在加快建设世界一流企业工作中取得了明显成效；未来，要聚焦服务“国之大者”，保持加快建设世界一流企业的战略定力。	22:20:45_x000D_ 【中国中车召开加快建设世界一流中车“四大行动”统筹推进会】财联社7月22日电，中国中车以“现场+视频”形式召开加快建设世界一流中车“四大行动”统筹推进会。国务院国资委企业改革局二级巡视员王健指出，中国中车是我国轨道交通装备领军企业，是国务院国资委遴选的首批创建世界一流示范企业。前期，中国中车勇当“主力军”“排头兵”，在加快建设世界一流企业工作中取得了明显成效；未来，要聚焦服务“国之大者”，保持加快建设世界一流企业的战略定力。
20230822	17:22 _x000D_ [[+_+]]_x000D_ 专享 专享_x000D_ 【风口研报·公司】信创加速落地，这家公司拥有“操作系统+云计算+安全存储”三大产品体系，分析师看60%估值修复空间；强资源板块或率先于市场见底，这家公司重磅	17:22 _x000D_ [[+_+]]_x000D_ 专享 专享_x000D_ 【风口研报·公司】信创加速落地，这家公司拥有“操作系统+云计算+安全存储”三大产品体系，分析师看60%估值修复空间；强资源板块或率先于市场见底，这家公司重磅铜矿项目将于年底投产，明年业绩有望增80% 解锁直达>>
20230828	【绿地控股：上半年净利约26.10亿元 同比下降37.87%】财联社8月28日电，绿地控股公告，上半年实现营业收入约1741.97亿元，同比下降14.84%；净利润约26.10亿元，同比下降37.87%；基本每股收益0.19元。截止6月末，公司资产负债率较年初下降1.87个百分点，扣除预收账款后的资产负债率下降2.46个百分点，有息负债余额下降至2145亿元。与此同时，上半年公司管理费用、销售费用同比分别下降了15%、33%。	19:36:26_x000D_ 【绿地控股：上半年净利约26.10亿元 同比下降37.87%】财联社8月28日电，绿地控股公告，上半年实现营业收入约1741.97亿元，同比下降14.84%；净利润约26.10亿元，同比下降37.87%；基本每股收益0.19元。截止6月末，公司资产负债率较年初下降1.87个百分点，扣除预收账款后的资产负债率下降2.46个百分点，有息负债余额下降至2145亿元。与此同时，上半年公司管理费用、销售费用同比分别下降了15%、33%。
20230227	【新华制药：取得碳酸司维拉姆片药品注册证书】财联社2月27日电，新华制药公告，近日，公司收到国家药品监督管理局核准签发的碳酸司维拉姆片《药品注册证书》。碳酸司维拉姆片用于控制正在接受透析治疗的慢性肾脏病（CKD）成人患者的高磷血症。	16:52_x000D_ 【新华制药：取得碳酸司维拉姆片药品注册证书】财联社2月27日电，新华制药公告，近日，公司收到国家药品监督管理局核准签发的碳酸司维拉姆片《药品注册证书》。碳酸司维拉姆片用于控制正在接受透析治疗的慢性肾脏病（CKD）成人患者的高磷血症。
20230702	【周鸿祎：大模型的趋势是做“小”做“专” 不会一个大模型搞垄断】《科创板日报》7月2日讯，周鸿祎今日在人工智能高峰论坛上表示，大模型未来将无处不在，大模型必须“通用”，赋能百行千业才能引领工业革命，大模型不是操作系统，未来会成为数字化系统的标配。大模型的趋势是做“小”做“专” 不会一个大模型搞垄断。（记者 李明明）	15:25:18_x000D_ 【周鸿祎：大模型的趋势是做“小”做“专” 不会一个大模型搞垄断】《科创板日报》7月2日讯，周鸿祎今日在人工智能高峰论坛上表示，大模型未来将无处不在，大模型必须“通用”，赋能百行千业才能引领工业革命，大模型不是操作系统，未来会成为数字化系统的标配。大模型的趋势是做“小”做“专” 不会一个大模型搞垄断。（记者 李明明）
20230207	【三体宇宙控股股东将发生变更 与游族网络“脱钩”】财联社2月7日电，记者获悉，《三体》内容开发及商业衍生的独家版权方三体宇宙（上海）文化发展有限公司将有重大股权变更，已成立新公司计划收购三体宇宙股权，目标是吸引更多优质投资人共建三体IP。一位接近三体宇宙人士透露，2022年已成立成都司元企业管理公司，将收购现有三体宇宙公司股权并成为公司大股东，预计持股比例将达到70%。三体宇宙内部管理层和公司架构不会随之发生变化。 据记者了解，在成都司元对三体宇宙的收购完成后，三体宇宙股东中将不再有游族关联公司。 (澎湃)	07:23_x000D_ 【三体宇宙控股股东将发生变更 与游族网络“脱钩”】财联社2月7日电，记者获悉，《三体》内容开发及商业衍生的独家版权方三体宇宙（上海）文化发展有限公司将有重大股权变更，已成立新公司计划收购三体宇宙股权，目标是吸引更多优质投资人共建三体IP。一位接近三体宇宙人士透露，2022年已成立成都司元企业管理公司，将收购现有三体宇宙公司股权并成为公司大股东，预计持股比例将达到70%。三体宇宙内部管理层和公司架构不会随之发生变化。 据记者了解，在成都司元对三体宇宙的收购完成后，三体宇宙股东中将不再有游族关联公司。 (澎湃)
20230420	【午评：创业板指跌近1% AI概念股持续逆势活跃】财联社4月20日电，市场早盘震荡调整，三大指数均小幅下跌。盘面上，AI概念股持续走强，其中CPO方向维持强势，联特科技、久联科技涨超10%，华工科技涨停；算力方向震荡走强，首都在线、寒武纪涨超10%；应用端展开反弹，蓝色光标涨超18%，中国科传、视觉中国、中国出版涨停。半导体板块盘中拉升，设备方向表现较强，沪电股份涨停，盛美上海、北方华创等大涨。下跌方面，赛道股陷入调整，锂电、光伏方向领跌，天奈科技跌超10%，宁德时代一度跌近3%。总体上个股跌多涨少，两市超3700只个股下跌。沪深两市今日成交额6866亿，较上个交易日放量457亿。板块方面，CPO、6G、东数西算、手机游戏等板块涨幅居前，旅游、盐湖提锂、一体化压铸、固态电池等板块跌幅居前。截至上午收盘，沪指跌0.69%，深成指跌0.5%，创业板指跌0.97%。北向资金方面，其中沪股通早盘…	11:32:36_x000D_ 【午评：创业板指跌近1% AI概念股持续逆势活跃】财联社4月20日电，市场早盘震荡调整，三大指数均小幅下跌。盘面上，AI概念股持续走强，其中CPO方向维持强势，联特科技、久联科技涨超10%，华工科技涨停；算力方向震荡走强，首都在线、寒武纪涨超10%；应用端展开反弹，蓝色光标涨超18%，中国科传、视觉中国、中国出版涨停。半导体板块盘中拉升，设备方向表现较强，沪电股份涨停，盛美上海、北方华创等大涨。下跌方面，赛道股陷入调整，锂电、光伏方向领跌，天奈科技跌超10%，宁德时代一度跌近3%。总体上个股跌多涨少，两市超3700只个股下跌。沪深两市今日成交额6866亿，较上个交易日放量457亿。板块方面，CPO、6G、东数西算、手机游戏等板块涨幅居前，旅游、盐湖提锂、一体化压铸、固态电池等板块跌幅居前。截至上午收盘，沪指跌0.69%，深成指跌0.5%，创业板指跌0.97…
20230602	【实丰文化：控股股东及其一致行动人质押18.67%公司股份】财联社6月2日电，实丰文化公告，公司近日接到公司控股股东蔡俊权及其一致行动人蔡俊淞函告，获悉其所持有公司的部分股份被质押。本次质押股份合计2240万股，占公司总股本的18.67%。	20:31:31_x000D_ 【实丰文化：控股股东及其一致行动人质押18.67%公司股份】财联社6月2日电，实丰文化公告，公司近日接到公司控股股东蔡俊权及其一致行动人蔡俊淞函告，获悉其所持有公司的部分股份被质押。本次质押股份合计2240万股，占公司总股本的18.67%。
20230614	08:51 _x000D_ [[+_+]]_x000D_ 专享 专享_x000D_ 【电报解读】AMD为数据中心推出新一代处理器产品，亚马逊、微软、Meta已经或将要运用，这家公司是AMD授权分销商 解锁直达>>	08:51 _x000D_ [[+_+]]_x000D_ 专享 专享_x000D_ 【电报解读】AMD为数据中心推出新一代处理器产品，亚马逊、微软、Meta已经或将要运用，这家公司是AMD授权分销商 解锁直达>>
20230620	【凯普生物：子公司产品首次获批宫颈癌筛查预期用途】财联社6月20日电，凯普生物公告，公司全资子公司潮州凯普生物近日取得国家药监局批准的《医疗器械变更注册（备案）文件（体外诊断试剂）》。公司“高危型人乳头瘤病毒核酸检测试剂盒(荧光PCR法)”率先获批增加宫颈癌初筛、宫颈癌联合筛查和ASC-US人群分流预期用途，此次预期用途的变更属于同品种首个产品首次申报，为国家药监局批准的第一个用于宫颈癌筛查预期用途的产品。	16:29:03_x000D_ 【凯普生物：子公司产品首次获批宫颈癌筛查预期用途】财联社6月20日电，凯普生物公告，公司全资子公司潮州凯普生物近日取得国家药监局批准的《医疗器械变更注册（备案）文件（体外诊断试剂）》。公司“高危型人乳头瘤病毒核酸检测试剂盒(荧光PCR法)”率先获批增加宫颈癌初筛、宫颈癌联合筛查和ASC-US人群分流预期用途，此次预期用途的变更属于同品种首个产品首次申报，为国家药监局批准的第一个用于宫颈癌筛查预期用途的产品。
20230616	【通达海：在大模型方面公司目前还没有和科大讯飞具体的合作】财联社6月16日电，通达海接受机构调研时表示，在大模型方面，公司目前还没有和科大讯飞具体的合作，过去和科大讯飞的合作主要是庭审系统中的语音转换方面。公司多年来一直在做人工智能+司法的研发，已经形成了一个团队，对法院的各类业务场景的智能化需求也比较熟悉。人工智能应用方面人员除了公司内部自己培养的人员，也有新招聘、新引进的技术人员和法律方面专家。公司最近几年招聘力度比较大，公司每年的研发费用占收入的比例也比较高，近几年都在20%以上，主要是研发人员的费用。	12:00:42_x000D_ 【通达海：在大模型方面公司目前还没有和科大讯飞具体的合作】财联社6月16日电，通达海接受机构调研时表示，在大模型方面，公司目前还没有和科大讯飞具体的合作，过去和科大讯飞的合作主要是庭审系统中的语音转换方面。公司多年来一直在做人工智能+司法的研发，已经形成了一个团队，对法院的各类业务场景的智能化需求也比较熟悉。人工智能应用方面人员除了公司内部自己培养的人员，也有新招聘、新引进的技术人员和法律方面专家。公司最近几年招聘力度比较大，公司每年的研发费用占收入的比例也比较高，近几年都在20%以上，主要是研发人员的费用。
20230616	13:48 _x000D_ [[+_+]]_x000D_ 专享 专享_x000D_ 【盘中宝】适用于几乎所有生成式AI应用和终端领域，高通提出云边一体的混合AI路径，这家公司已有相关产品支持混合AI计算架构 解锁直达>>	13:48 _x000D_ [[+_+]]_x000D_ 专享 专享_x000D_ 【盘中宝】适用于几乎所有生成式AI应用和终端领域，高通提出云边一体的混合AI路径，这家公司已有相关产品支持混合AI计算架构 解锁直达>>
20230620	19:34 _x000D_ [[+_+]]_x000D_ 专享 专享_x000D_ 【机构调研】这家公司拥有纯自研国产分布式交易型数据库，预计明后年进入爆发期 解锁直达>>	19:34 _x000D_ [[+_+]]_x000D_ 专享 专享_x000D_ 【机构调研】这家公司拥有纯自研国产分布式交易型数据库，预计明后年进入爆发期 解锁直达>>
20230406	【午评：科创50指数涨超2% 半导体概念股集体爆发】财联社4月6日电，市场早盘低开后震荡反弹，三大指数均小幅下跌，科创50指数涨超2%。盘面上，半导体概念股集体大涨带动科创50指数走强，源杰科技、恒玄科技均20CM涨停，全志科技、胜宏科技等多股涨超10%。CPO概念股继续活跃，博创科技、仕佳光子、新易盛涨超10%。智能音箱概念股开盘走强，奋达科技涨停，创维数字、佳禾智能涨超8%。海南自贸区概念股盘中异动，海南瑞泽、海峡股份、国新健康涨停。下跌方面，AI应用端相关板块陷入调整，ChatGPT概念股领跌，鸿博股份、海天瑞声等多股跌超5%。总体上个股跌多涨少，两市超3100只个股下跌。沪深两市今日成交额7258亿，较上个交易日缩量1174亿。板块方面，半导体、Chiplet、CPO、智能音箱等板块涨幅居前，ChatGPT、传媒、手机游戏、AIGC等板块跌幅居前。截至上午收盘，沪指跌0.04%，…	11:33:25_x000D_ 【午评：科创50指数涨超2% 半导体概念股集体爆发】财联社4月6日电，市场早盘低开后震荡反弹，三大指数均小幅下跌，科创50指数涨超2%。盘面上，半导体概念股集体大涨带动科创50指数走强，源杰科技、恒玄科技均20CM涨停，全志科技、胜宏科技等多股涨超10%。CPO概念股继续活跃，博创科技、仕佳光子、新易盛涨超10%。智能音箱概念股开盘走强，奋达科技涨停，创维数字、佳禾智能涨超8%。海南自贸区概念股盘中异动，海南瑞泽、海峡股份、国新健康涨停。下跌方面，AI应用端相关板块陷入调整，ChatGPT概念股领跌，鸿博股份、海天瑞声等多股跌超5%。总体上个股跌多涨少，两市超3100只个股下跌。沪深两市今日成交额7258亿，较上个交易日缩量1174亿。板块方面，半导体、Chiplet、CPO、智能音箱等板块涨幅居前，ChatGPT、传媒、手机游戏、AIGC等板块跌幅居前。…
20230824	【景旺电子：上半年净利润4.04亿元 同比下降13.23%】财联社8月24日电，景旺电子发布半年报，上半年实现营业收入约49.61亿元，同比下降3.23%；净利润约4.04亿元，同比下降13.23%；基本每股收益0.48元。	21:22:00_x000D_ 【景旺电子：上半年净利润4.04亿元 同比下降13.23%】财联社8月24日电，景旺电子发布半年报，上半年实现营业收入约49.61亿元，同比下降3.23%；净利润约4.04亿元，同比下降13.23%；基本每股收益0.48元。
20230906	【钧达股份：公司研发中心已建立基于N型技术的BC产品实验线】财联社9月6日电，钧达股份在互动平台表示，BC作为平台技术，无排他性，BC类电池包括IBC、TBC、PBC、HPBC等，TOPCon针对单面市场经过工艺优化升级即为TBC，HJT技术与BC结合即为HBC，但均为N型技术。 钧达股份作为行业率先实现TOPCon大规模量产的企业，持续开展N型技术研究及相关技术储备，公司研发中心已建立基于N型技术的BC产品实验线，下步将进入中试阶段，实现N型BC产品线量产，推动N型产品升级。	22:39:21_x000D_ 【钧达股份：公司研发中心已建立基于N型技术的BC产品实验线】财联社9月6日电，钧达股份在互动平台表示，BC作为平台技术，无排他性，BC类电池包括IBC、TBC、PBC、HPBC等，TOPCon针对单面市场经过工艺优化升级即为TBC，HJT技术与BC结合即为HBC，但均为N型技术。 钧达股份作为行业率先实现TOPCon大规模量产的企业，持续开展N型技术研究及相关技术储备，公司研发中心已建立基于N型技术的BC产品实验线，下步将进入中试阶段，实现N型BC产品线量产，推动N型产品升级。
20230908	【药康生物：财务总监焦晓杉辞职】财联社9月8日电，药康生物公告，董事会近日收到公司财务总监焦晓杉的书面辞职报告。焦晓杉因个人原因申请辞去财务总监职务，辞任后不再担任公司任何职务。	16:16:29_x000D_ 【药康生物：财务总监焦晓杉辞职】财联社9月8日电，药康生物公告，董事会近日收到公司财务总监焦晓杉的书面辞职报告。焦晓杉因个人原因申请辞去财务总监职务，辞任后不再担任公司任何职务。
20230404	【华康医疗：预中标2.4亿元工程项目】财联社4月4日电，华康医疗公告，公司预中标“上海交通大学医学院浦东校区工程（标段二）科研集群工艺增加（安装+装饰装修工程）专业分包工程 ”项目，中标金额2.4亿元。	19:19:20_x000D_ 【华康医疗：预中标2.4亿元工程项目】财联社4月4日电，华康医疗公告，公司预中标“上海交通大学医学院浦东校区工程（标段二）科研集群工艺增加（安装+装饰装修工程）专业分包工程 ”项目，中标金额2.4亿元。
20230417	【横店东磁：今年上半年PERC盈利会维持在较好水平 下半年盈利可能会受挤压】财联社4月17日电，横店东磁接受机构调研时表示，公司光伏Q1单瓦盈利与去年同期相比实现了翻番以上的增长。公司认为今年上半年PERC盈利会维持在较好水平，下半年随着产业供需结构的变化及N型产出的增加，盈利可能会受挤压，具体单瓦盈利还存在不确定性。组件端，公司计划全年出货9GW左右，Q1出货约1.6GW，预计Q2环比Q1增长30%以上，下半年出货会比上半年要多一些，因为下半年会有新的产能释放；电池端，随着公司电池转组件战略实施，以内供为主，全年外销计划约2GW。市场端来看，公司仍以国外为主，预计国内市场占比约20%。	12:03:38_x000D_ 【横店东磁：今年上半年PERC盈利会维持在较好水平 下半年盈利可能会受挤压】财联社4月17日电，横店东磁接受机构调研时表示，公司光伏Q1单瓦盈利与去年同期相比实现了翻番以上的增长。公司认为今年上半年PERC盈利会维持在较好水平，下半年随着产业供需结构的变化及N型产出的增加，盈利可能会受挤压，具体单瓦盈利还存在不确定性。组件端，公司计划全年出货9GW左右，Q1出货约1.6GW，预计Q2环比Q1增长30%以上，下半年出货会比上半年要多一些，因为下半年会有新的产能释放；电池端，随着公司电池转组件战略实施，以内供为主，全年外销计划约2GW。市场端来看，公司仍以国外为主，预计国内市场占比约20%。
20230901	【中信证券：房地产开发投资可能已经见底 未来或将反弹】财联社9月1日电，中信证券研报指出，差别化住房信贷政策优化调整，预计将和前期认房不认贷的政策一起形成合力，助力居民减轻置业负担，有利于加快释放合理住房需求。这也显示了政策积极有为，果断致力于防风险和稳增长。存量房贷利率重定价，有望降低居民负担，释放消费能力。我们测算，相关政策可能为超过1000万中产家庭每年节约1.2万元的资金成本。我们认为，在户籍改革的助推下，在区域发展重心变化和城市更新思路变化的加持下，以城中村改造为供给侧核心新变量，以新市民进城为需求侧核心新变量，中国房地产开发投资可能已经见底，未来或将反弹。房地产产业链不仅受益于短期房价走稳，更受益于中长期新的高质量城市发展浪潮。我们看好房地产产业链的投资价值，也相信房地产价格走稳，有助于宏观经济保持稳定向好态势。	08:48:06_x000D_ 【中信证券：房地产开发投资可能已经见底 未来或将反弹】财联社9月1日电，中信证券研报指出，差别化住房信贷政策优化调整，预计将和前期认房不认贷的政策一起形成合力，助力居民减轻置业负担，有利于加快释放合理住房需求。这也显示了政策积极有为，果断致力于防风险和稳增长。存量房贷利率重定价，有望降低居民负担，释放消费能力。我们测算，相关政策可能为超过1000万中产家庭每年节约1.2万元的资金成本。我们认为，在户籍改革的助推下，在区域发展重心变化和城市更新思路变化的加持下，以城中村改造为供给侧核心新变量，以新市民进城为需求侧核心新变量，中国房地产开发投资可能已经见底，未来或将反弹。房地产产业链不仅受益于短期房价走稳，更受益于中长期新的高质量城市发展浪潮。我们看好房地产产业链的投资价值，也相信房地产价格走稳，有助于宏观经济保持稳定向好态势。
20230525	【比亚迪发布声明回应长城汽车举报：坚决反对任何形式的不正当竞争行为 相关产品及检测符合国家标准】财联社5月25日电，比亚迪发布声明：坚决反对任何形式的不正当竞争行为，并保留法务诉讼的权力。经了解，长城所说的情况，测试车辆由长城购买、保管并安排送检，中汽中心(天津) 按长城的要求进行了相关项目的检测。测试车辆严格来说，不符合国标要求的送检状态，即应由第三方抽样、保管及送检，并要求完成3000公里磨合后测试，而长城送检的车辆在检测时，里程仅为450-670公里。鉴于以上，我们认为其检测报告无效，长城不能以此作为依据。我们的产品及相关检测符合国家标准，在国家权威机构通过认证。欢迎有关部门随时过来调查、取证和检测。	12:28:32_x000D_ 【比亚迪发布声明回应长城汽车举报：坚决反对任何形式的不正当竞争行为 相关产品及检测符合国家标准】财联社5月25日电，比亚迪发布声明：坚决反对任何形式的不正当竞争行为，并保留法务诉讼的权力。经了解，长城所说的情况，测试车辆由长城购买、保管并安排送检，中汽中心(天津) 按长城的要求进行了相关项目的检测。测试车辆严格来说，不符合国标要求的送检状态，即应由第三方抽样、保管及送检，并要求完成3000公里磨合后测试，而长城送检的车辆在检测时，里程仅为450-670公里。鉴于以上，我们认为其检测报告无效，长城不能以此作为依据。我们的产品及相关检测符合国家标准，在国家权威机构通过认证。欢迎有关部门随时过来调查、取证和检测。
20230602	【玲珑轮胎：与特斯拉已经进行商务对接和技术交流】财联社6月2日电，玲珑轮胎在互动平台表示，公司与特斯拉已经进行商务对接和技术交流，后续工作正在稳步推进中。	12:52:02_x000D_ 【玲珑轮胎：与特斯拉已经进行商务对接和技术交流】财联社6月2日电，玲珑轮胎在互动平台表示，公司与特斯拉已经进行商务对接和技术交流，后续工作正在稳步推进中。
20230504	【王子新材：控股子公司发生火灾事故】财联社5月4日电，王子新材公告，持有51%股权的控股子公司重庆富易达科技有限公司位于山东省青岛市胶州市胶东街道办事处纺织工业园内的下属子公司仓库在2023年4月29日22:00左右发生火灾；本次火灾未造成任何人员伤亡，火灾现场厂房、设备、存货一定程度受损，具体损失金额正在核实评估。	16:41:59_x000D_ 【王子新材：控股子公司发生火灾事故】财联社5月4日电，王子新材公告，持有51%股权的控股子公司重庆富易达科技有限公司位于山东省青岛市胶州市胶东街道办事处纺织工业园内的下属子公司仓库在2023年4月29日22:00左右发生火灾；本次火灾未造成任何人员伤亡，火灾现场厂房、设备、存货一定程度受损，具体损失金额正在核实评估。
20230430	【新天绿能：4月公司及子公司完成发电量同比增加5.39%】财联社5月8日电，新天绿能公告，4月，本公司及子公司按合并报表口径完成发电量1,513,624.12兆瓦时，同比增加5.39%。截至2023年4月30日，累计完成发电量5,619,953.12兆瓦时，同比增加4.10%。	17:14:15_x000D_ 【新天绿能：4月公司及子公司完成发电量同比增加5.39%】财联社5月8日电，新天绿能公告，4月，本公司及子公司按合并报表口径完成发电量1,513,624.12兆瓦时，同比增加5.39%。截至2023年4月30日，累计完成发电量5,619,953.12兆瓦时，同比增加4.10%。
20230516	【鼎胜新材：与SK新能源签订锂电池铝箔采购协议】财联社5月16日电，鼎胜新材公告，全资子公司杭州五星铝业有限公司与SK新能源签订协议，2023年下半年-2027年期间，SK新能源及其指定的生产基地向公司全资子公司五星铝业采购锂电池铝箔，总采购量合计为3.24万吨左右。	18:08:31_x000D_ 【鼎胜新材：与SK新能源签订锂电池铝箔采购协议】财联社5月16日电，鼎胜新材公告，全资子公司杭州五星铝业有限公司与SK新能源签订协议，2023年下半年-2027年期间，SK新能源及其指定的生产基地向公司全资子公司五星铝业采购锂电池铝箔，总采购量合计为3.24万吨左右。
20230418	【机器人：新能源汽车领域工业机器人的需求预计将持续增长】财联社4月18日电，机器人接受机构调研时表示，机器人行业是国内发展智能制造的重点领域，预计机器人行业2023年以及中长期将保持增长趋势；从下游应用来看，比如在新能源汽车领域，工业机器人的需求预计将持续增长，随着机器人代替人工所带来的效率和安全性等方面的提升，除应用在汽车、电子等传统场景外，工业机器人在光伏、储能、氢能等战略性新兴领域的需求也会有所增加。	09:32:43_x000D_ 【机器人：新能源汽车领域工业机器人的需求预计将持续增长】财联社4月18日电，机器人接受机构调研时表示，机器人行业是国内发展智能制造的重点领域，预计机器人行业2023年以及中长期将保持增长趋势；从下游应用来看，比如在新能源汽车领域，工业机器人的需求预计将持续增长，随着机器人代替人工所带来的效率和安全性等方面的提升，除应用在汽车、电子等传统场景外，工业机器人在光伏、储能、氢能等战略性新兴领域的需求也会有所增加。
20230425	【哈投股份：拟以7722.51万元收购控股股东持有的正业热电100%股权】财联社4月25日电，哈投股份公告，公司拟以现金方式收购控股股东哈尔滨投资集团有限责任公司（简称哈投集团）持有的哈尔滨正业热电有限责任公司（简称正业热电）100%股权，交易价格7722.51万元（含增值税）。本次股权收购的目的是为了提升热电业务盈利能力，减少关联交易，避免同业竞争，促进公司双主业均衡发展。	17:06:40_x000D_ 【哈投股份：拟以7722.51万元收购控股股东持有的正业热电100%股权】财联社4月25日电，哈投股份公告，公司拟以现金方式收购控股股东哈尔滨投资集团有限责任公司（简称哈投集团）持有的哈尔滨正业热电有限责任公司（简称正业热电）100%股权，交易价格7722.51万元（含增值税）。本次股权收购的目的是为了提升热电业务盈利能力，减少关联交易，避免同业竞争，促进公司双主业均衡发展。
20230326	21:22 _x000D_ [[+_+]]_x000D_ 专享 专享_x000D_ 【风口研报·洞察】TMT拥挤到啥程度了，后续如何发展；ChatGPT故障导致数据泄露敲响新警钟，分析师提示需重视算法安全→溯源取证→数据安全产业链，大语言模	21:22 _x000D_ [[+_+]]_x000D_ 专享 专享_x000D_ 【风口研报·洞察】TMT拥挤到啥程度了，后续如何发展；ChatGPT故障导致数据泄露敲响新警钟，分析师提示需重视算法安全→溯源取证→数据安全产业链，大语言模型或正在给数字安全带来巨大隐患 解锁直达>>
20230404	【弘信电子：与上海燧原科技有限公司签订战略合作协议 打造自主可控的人工智能软硬件基础设施等】财联社4月4日电，弘信电子公告，双方将打造适合人工智能应用与训练基础能力的国产化算力平台，共同推进“东数西算”、大数据、人工智能等领域的业务落地。在公司的柔性线路板加工、EMS 装配等工业场景中，充分使用燧原科技提供的国产化算力推理服务，共同探索工业质检智能化、高效化应用系统，有效提升质检效率，扩大项目产能。依托国产化算法服务，优化智能制造体系。	20:21:16_x000D_ 【弘信电子：与上海燧原科技有限公司签订战略合作协议 打造自主可控的人工智能软硬件基础设施等】财联社4月4日电，弘信电子公告，双方将打造适合人工智能应用与训练基础能力的国产化算力平台，共同推进“东数西算”、大数据、人工智能等领域的业务落地。在公司的柔性线路板加工、EMS 装配等工业场景中，充分使用燧原科技提供的国产化算力推理服务，共同探索工业质检智能化、高效化应用系统，有效提升质检效率，扩大项目产能。依托国产化算法服务，优化智能制造体系。
20230829	【方大特钢：上半年净利约2.85亿元 同比下降71.03%】财联社8月29日电，方大特钢发布半年报，上半年实现营业收入约133.89亿元，同比下降23.10%；净利润约2.85亿元，同比下降71.03%；基本每股收益约0.13元。2023年上半年，公司钢铁产品产销量分别为192.62万吨、192.45万吨，分别同比减少7.89%、7.52%。	21:24:19_x000D_ 【方大特钢：上半年净利约2.85亿元 同比下降71.03%】财联社8月29日电，方大特钢发布半年报，上半年实现营业收入约133.89亿元，同比下降23.10%；净利润约2.85亿元，同比下降71.03%；基本每股收益约0.13元。2023年上半年，公司钢铁产品产销量分别为192.62万吨、192.45万吨，分别同比减少7.89%、7.52%。
20230829	【浙大网新：转让参股子公司九源基因4.9%股权】财联社8月29日电，浙大网新公告，公司全资子公司网新创投与万里扬集团签署《股权转让协议》，将其持有的参股子公司九源基因的4.9%股权转让给万里扬集团，交易作价4067万元。本次股权转让完成后，网新创投仍持有九源基因12.2569%股权。	17:01:21_x000D_ 【浙大网新：转让参股子公司九源基因4.9%股权】财联社8月29日电，浙大网新公告，公司全资子公司网新创投与万里扬集团签署《股权转让协议》，将其持有的参股子公司九源基因的4.9%股权转让给万里扬集团，交易作价4067万元。本次股权转让完成后，网新创投仍持有九源基因12.2569%股权。
20230905	【彩虹集团：海外市场订单对收入不构成实质影响】财联社9月5日电，彩虹集团在互动平台回复投资者提问表示，公司目前获得了一些海外市场订单，但总体金额不大，对公司收入不构成实质影响。根据订单个性化要求，公司组织力量生产交付。	14:05:22_x000D_ 【彩虹集团：海外市场订单对收入不构成实质影响】财联社9月5日电，彩虹集团在互动平台回复投资者提问表示，公司目前获得了一些海外市场订单，但总体金额不大，对公司收入不构成实质影响。根据订单个性化要求，公司组织力量生产交付。
20230803	【金杨股份：公司不生产超导材料】财联社8月3日电，金杨股份在互动平台表示，公司不生产超导材料，目前无进军超导材料的计划。	09:14:49_x000D_ 【金杨股份：公司不生产超导材料】财联社8月3日电，金杨股份在互动平台表示，公司不生产超导材料，目前无进军超导材料的计划。
20230814	【北京商报评论：A股也可以考虑取消印花税】财联社8月14日电，北京商报评论文章称，香港证券业发声要求撤销股票印花税，A股也可以考虑取消印花税。证券交易印花税对于总税收而言影响并不大，但是却一定程度上阻碍了资本市场的活跃，彻底取消证券交易印花税有利于股市的发展和活跃，是股民期待的好事。同时，证券交易印花税也不再具备平衡收入的功能，因为散户投资者大面积亏损，对一个亏损的群体征税，并不能起到调节收入的作用。所以说，证券交易印花税已经具备了彻底取消的基础。取消印花税能够引发场内的投资者赚到第一桶金，然后这些投资者的亲朋好友才会增加对股市的投资，从而引发股市的长期牛市，而这些赚到钱的投资者，也会成为促进消费的主力军。	19:34:18_x000D_ 【北京商报评论：A股也可以考虑取消印花税】财联社8月14日电，北京商报评论文章称，香港证券业发声要求撤销股票印花税，A股也可以考虑取消印花税。证券交易印花税对于总税收而言影响并不大，但是却一定程度上阻碍了资本市场的活跃，彻底取消证券交易印花税有利于股市的发展和活跃，是股民期待的好事。同时，证券交易印花税也不再具备平衡收入的功能，因为散户投资者大面积亏损，对一个亏损的群体征税，并不能起到调节收入的作用。所以说，证券交易印花税已经具备了彻底取消的基础。取消印花税能够引发场内的投资者赚到第一桶金，然后这些投资者的亲朋好友才会增加对股市的投资，从而引发股市的长期牛市，而这些赚到钱的投资者，也会成为促进消费的主力军。
20230607	【早间公告】①英搏尔：向不特定对象发行可转债申请文件获深交所受理。②亚太科技：公司控股股东、实控人周福海、周吉所持有的公司部分可转债进行了质押，此次质押合计占发行总量的42.97%。	08:23:43_x000D_ 【早间公告】①英搏尔：向不特定对象发行可转债申请文件获深交所受理。_x000D_ _x000D_ ②亚太科技：公司控股股东、实控人周福海、周吉所持有的公司部分可转债进行了质押，此次质押合计占发行总量的42.97%。
20230131	【ST熊猫：因涉嫌操纵证券市场等 股东章奕颖被证监会立案调查】财联社1月31日电，ST熊猫公告，公司持股5%以上股东章奕颖收到中国证券监督管理委员会《立案告知书》，通知内容如下：“因涉嫌操纵证券市场等，中国证监会决定对章奕颖立案调查。”本次立案调查事项系针对公司持股5%以上股东章奕颖的调查，公司生产经营活动不会受到影响。	19:03_x000D_ 【ST熊猫：因涉嫌操纵证券市场等 股东章奕颖被证监会立案调查】财联社1月31日电，ST熊猫公告，公司持股5%以上股东章奕颖收到中国证券监督管理委员会《立案告知书》，通知内容如下：“因涉嫌操纵证券市场等，中国证监会决定对章奕颖立案调查。”本次立案调查事项系针对公司持股5%以上股东章奕颖的调查，公司生产经营活动不会受到影响。
20230615	【瑞丰银行：执行董事、行长张向荣辞职】财联社6月15日电，瑞丰银行公告，张向荣因工作调动原因，申请辞去本行执行董事、行长、审计委员会委员、风险管理和关联交易委员会委员职务，辞职后不再担任本行任何职务。	17:12:12_x000D_ 【瑞丰银行：执行董事、行长张向荣辞职】财联社6月15日电，瑞丰银行公告，张向荣因工作调动原因，申请辞去本行执行董事、行长、审计委员会委员、风险管理和关联交易委员会委员职务，辞职后不再担任本行任何职务。
20230509	【任子行：终止向特定对象发行股票事项】财联社5月9日电，任子行公告，鉴于公司2022年度财务报表被出具带强调事项段的保留意见审计报告，经相关各方充分沟通、审慎分析后，公司决定终止向特定对象发行股票事项，在证监会同意注册批复文件的有效期内不再发行，且此次决议不可撤销。目前公司各项经营活动正常，此次向特定对象发行股票涉及募投项目“工业互联网安全防护产品项目”“5G网络安全研发中心项目”已由公司通过自有资金投入实施。	21:47:16_x000D_ 【任子行：终止向特定对象发行股票事项】财联社5月9日电，任子行公告，鉴于公司2022年度财务报表被出具带强调事项段的保留意见审计报告，经相关各方充分沟通、审慎分析后，公司决定终止向特定对象发行股票事项，在证监会同意注册批复文件的有效期内不再发行，且此次决议不可撤销。目前公司各项经营活动正常，此次向特定对象发行股票涉及募投项目“工业互联网安全防护产品项目”“5G网络安全研发中心项目”已由公司通过自有资金投入实施。
20230524	17:40 _x000D_ [[+_+]]_x000D_ 专享 专享_x000D_ 【风口研报·反转】十年一遇的投资机会，分析师强call该行业动销景气、补库景气的背景下，全产业链盈利能力都有望修复，且后续还有较大政策放松空间；另有家国内机	17:40 _x000D_ [[+_+]]_x000D_ 专享 专享_x000D_ 【风口研报·反转】十年一遇的投资机会，分析师强call该行业动销景气、补库景气的背景下，全产业链盈利能力都有望修复，且后续还有较大政策放松空间；另有家国内机床龙头加码五轴机床布局，今年有望释放利润弹性 解锁直达>>
20230804	【同仁堂：上半年净利润同比增长32.71%】财联社8月4日电，同仁堂发布业绩快报，上半年公司实现营业收入97.61亿元，同比增长30.02%；实现归属于上市公司股东的净利润9.87亿元，同比增长32.71%。随着中医药市场需求增加，同时公司积极开拓市场，深化营销改革，下属公司销量大幅度增长。	16:52:53_x000D_ 【同仁堂：上半年净利润同比增长32.71%】财联社8月4日电，同仁堂发布业绩快报，上半年公司实现营业收入97.61亿元，同比增长30.02%；实现归属于上市公司股东的净利润9.87亿元，同比增长32.71%。随着中医药市场需求增加，同时公司积极开拓市场，深化营销改革，下属公司销量大幅度增长。
20230804	【圣农发展：上半年净利润4.26亿元】财联社8月4日电，圣农发展披露业绩快报，上半年实现营业收入90.8亿元，同比增长20.63%，净利润4.26亿元，上年同期净亏损9879.55万元。2023年上半年，公司继续秉承管理持续优化的策略，加强上下游板块的协同配合。	17:18:07_x000D_ 【圣农发展：上半年净利润4.26亿元】财联社8月4日电，圣农发展披露业绩快报，上半年实现营业收入90.8亿元，同比增长20.63%，净利润4.26亿元，上年同期净亏损9879.55万元。2023年上半年，公司继续秉承管理持续优化的策略，加强上下游板块的协同配合。
20230815	11:19 _x000D_ [[+_+]]_x000D_ 专享 专享_x000D_ 【风口研报·公司】央行调降MLF利率，这家公司兼具低估值与高分红，且有望迎来新一轮业绩增长+分红比例提升共振，分析师预计未来3年经营现金流大增 解锁直达>>	11:19 _x000D_ [[+_+]]_x000D_ 专享 专享_x000D_ 【风口研报·公司】央行调降MLF利率，这家公司兼具低估值与高分红，且有望迎来新一轮业绩增长+分红比例提升共振，分析师预计未来3年经营现金流大增 解锁直达>>
20230910	【网传所有融券10月1日前必须归还？ 多家券商营业部人士称：目前未收到此类通知】财联社9月10日电，市场上关于融券T+0策略存在制度套利漏洞的争议持续发酵。最近，网络平台有一些消息称：通知要求，所有融券10月1日前必须归还。记者就此向中信证券、国泰君安、安信证券等多家券商的营业部人士进行求证。这些人士均表示，截至目前尚未收到这样的通知。一券商人士表示，是否参与融券，这是客户自主选择的行为，证券公司不会主动发布这样的通知来干扰客户的决策。 (每经网)	14:14:51_x000D_ 【网传所有融券10月1日前必须归还？ 多家券商营业部人士称：目前未收到此类通知】财联社9月10日电，市场上关于融券T+0策略存在制度套利漏洞的争议持续发酵。最近，网络平台有一些消息称：通知要求，所有融券10月1日前必须归还。记者就此向中信证券、国泰君安、安信证券等多家券商的营业部人士进行求证。这些人士均表示，截至目前尚未收到这样的通知。一券商人士表示，是否参与融券，这是客户自主选择的行为，证券公司不会主动发布这样的通知来干扰客户的决策。 (每经网)
20230911	13:17 _x000D_ [[+_+]]_x000D_ 专享 专享_x000D_ 【盘中宝】新一代Apple Watch部件有望率先通过这一技术实现，该技术成熟后未来将推广到手机链，这家公司是国内细分领域龙头，深度绑定航空航天等下游 解锁	13:17 _x000D_ [[+_+]]_x000D_ 专享 专享_x000D_ 【盘中宝】新一代Apple Watch部件有望率先通过这一技术实现，该技术成熟后未来将推广到手机链，这家公司是国内细分领域龙头，深度绑定航空航天等下游 解锁直达>>
20230810	【C盟固利盘低开回升 触发临停】财联社8月10日电，C盟固利盘中跌40%，较开盘价涨幅达30%触发临停，该股昨日收涨1742%。目前成交额7.27亿元，换手率为26.79%。	09:37:28_x000D_ 【C盟固利盘低开回升 触发临停】财联社8月10日电，C盟固利盘中跌40%，较开盘价涨幅达30%触发临停，该股昨日收涨1742%。目前成交额7.27亿元，换手率为26.79%。
20230814	【中信证券：近期降准的概率比较大 甚至不排除进一步降低政策利率的可能性】财联社8月14日电，中信证券研报指出，7月信贷数据显著弱于预期，背后的原因可能在于储备项目透支，新增需求不足；居民加杠杆意愿较弱，住房购买放缓叠加按揭贷款提前偿还。从数据反映的现实情况来看，我们认为近期降准的概率比较大，甚至不排除进一步降低政策利率的可能性。总而言之，当前基本面情况利好债市表现，流动性在稳增长诉求下也将继续保持宽松状态，但稳增长政策预期对市场的影响也在加强，我们预计短期债市可能延续窄幅偏强波动。	08:29:39_x000D_ 【中信证券：近期降准的概率比较大 甚至不排除进一步降低政策利率的可能性】财联社8月14日电，中信证券研报指出，7月信贷数据显著弱于预期，背后的原因可能在于储备项目透支，新增需求不足；居民加杠杆意愿较弱，住房购买放缓叠加按揭贷款提前偿还。从数据反映的现实情况来看，我们认为近期降准的概率比较大，甚至不排除进一步降低政策利率的可能性。总而言之，当前基本面情况利好债市表现，流动性在稳增长诉求下也将继续保持宽松状态，但稳增长政策预期对市场的影响也在加强，我们预计短期债市可能延续窄幅偏强波动。
20230602	【铭普光磁：公司400G光模块已经批量交付 800G高速光模块正在研发当中】财联社6月2日电，铭普光磁在互动平台表示，公司400G光模块已经批量交付，800G高速光模块正在研发当中。近年来公司紧贴行业的技术发展趋势，围绕客户未来需求进行前瞻性技术储备。	20:30:55_x000D_ 【铭普光磁：公司400G光模块已经批量交付 800G高速光模块正在研发当中】财联社6月2日电，铭普光磁在互动平台表示，公司400G光模块已经批量交付，800G高速光模块正在研发当中。近年来公司紧贴行业的技术发展趋势，围绕客户未来需求进行前瞻性技术储备。
20230610	【首都在线：和北大强强联手 推动人工智能在各行各业的应用落地】财联社6月10日电，首都在线官方消息称，为建设更为优质的智能算力环境，服务AIGC产业发展，首都在线和北大强强联手，分享最新的研究成果和技术进展，加速人工智能技术的转化，推动人工智能在各行各业的应用落地。目前，正在积极与国内以燧原科技为代表的AI算力厂商及AI初创企业展开合作，计划推出国产训练和推理平台。基于自身全球化的代理商、机房和专线资源布局，可以协助大模型、AIGC企业进行出海业务。	20:49:30_x000D_ 【首都在线：和北大强强联手 推动人工智能在各行各业的应用落地】财联社6月10日电，首都在线官方消息称，为建设更为优质的智能算力环境，服务AIGC产业发展，首都在线和北大强强联手，分享最新的研究成果和技术进展，加速人工智能技术的转化，推动人工智能在各行各业的应用落地。目前，正在积极与国内以燧原科技为代表的AI算力厂商及AI初创企业展开合作，计划推出国产训练和推理平台。基于自身全球化的代理商、机房和专线资源布局，可以协助大模型、AIGC企业进行出海业务。
20230410	17:22 _x000D_ [[+_+]]_x000D_ 专享 专享_x000D_ 【风口研报·公司】估值较过去2年折价40%的底部消费电子标的，受益于泛AI带来的音频智能家居出货量提升，管理层均具备国际化互联网企业从业背景；另有一家今年利	17:22 _x000D_ [[+_+]]_x000D_ 专享 专享_x000D_ 【风口研报·公司】估值较过去2年折价40%的底部消费电子标的，受益于泛AI带来的音频智能家居出货量提升，管理层均具备国际化互联网企业从业背景；另有一家今年利润或增800%+的复苏黑马 解锁直达>>
20230426	【东华软件：与腾讯云计算（北京）有限责任公司签署深化战略合作协议】财联社4月26日电，东华软件公告，与腾讯云计算（北京）有限责任公司签署深化战略合作协议，基于腾讯AI大模型基础研发能力，双方联合开展产业应用，东华软件作为腾讯核心战略合作伙伴，将优先适配相关技术，东华将优先向市场推广腾讯云相关成熟AI技术产品。	16:13:51_x000D_ 【东华软件：与腾讯云计算（北京）有限责任公司签署深化战略合作协议】财联社4月26日电，东华软件公告，与腾讯云计算（北京）有限责任公司签署深化战略合作协议，基于腾讯AI大模型基础研发能力，双方联合开展产业应用，东华软件作为腾讯核心战略合作伙伴，将优先适配相关技术，东华将优先向市场推广腾讯云相关成熟AI技术产品。
20230426	10:19 _x000D_ [[+_+]]_x000D_ 专享 专享_x000D_ 【盘中宝】预订量大增超10倍，这一消费市场加速复苏，这家公司是这一地区相关领域唯一上市平台 解锁直达>>	10:19 _x000D_ [[+_+]]_x000D_ 专享 专享_x000D_ 【盘中宝】预订量大增超10倍，这一消费市场加速复苏，这家公司是这一地区相关领域唯一上市平台 解锁直达>>
20230407	【分众传媒：控股子公司境外上市预备审核已取得批准】财联社4月7日电，分众传媒公告，近日，公司控股子公司 Focus Media Korea Co., Ltd.收到韩国证券期货交易所通知，其上市预备审核已取得韩国证券期货交易所的批准。	18:44:17_x000D_ 【分众传媒：控股子公司境外上市预备审核已取得批准】财联社4月7日电，分众传媒公告，近日，公司控股子公司 Focus Media Korea Co., Ltd.收到韩国证券期货交易所通知，其上市预备审核已取得韩国证券期货交易所的批准。
20230417	【科大讯飞：将于5月6日举办认知大模型成果发布会】财联社4月17日电，科大讯飞公告，将于2023年5月6日举办认知大模型成果发布会，公司尚不能预测相关技术及应用对2023年度销售收入和经营业绩的提升影响。	17:17:00_x000D_ 【科大讯飞：将于5月6日举办认知大模型成果发布会】财联社4月17日电，科大讯飞公告，将于2023年5月6日举办认知大模型成果发布会，公司尚不能预测相关技术及应用对2023年度销售收入和经营业绩的提升影响。
20230424	【保险股震荡走强 新华保险涨超7%】财联社4月24日电，新华保险涨超7%，中国人保、中国太保、中国平安、中国人寿等跟涨。消息面上，新华保险公告称预计2023年一季度盈利67.62亿至70.84亿 净利润同比增长110%至120%。	09:40:32_x000D_ 【保险股震荡走强 新华保险涨超7%】财联社4月24日电，新华保险涨超7%，中国人保、中国太保、中国平安、中国人寿等跟涨。消息面上，新华保险公告称预计2023年一季度盈利67.62亿至70.84亿 净利润同比增长110%至120%。
20230427	【会稽山：一季度净利同比增长1.26%】财联社4月27日电，会稽山公告，一季度净利润7938.77万元，同比增长1.26%。	15:48:05_x000D_ 【会稽山：一季度净利同比增长1.26%】财联社4月27日电，会稽山公告，一季度净利润7938.77万元，同比增长1.26%。
20230418	【神农集团：拟20亿元投建红河州生猪全产业链项目】财联社4月18日电，神农集团公告，与红河哈尼族彝族自治州人民政府签订框架协议，携手打造红河州现代生猪养殖、屠宰及肉制品精深加工全产业链，在弥勒、泸西、开远、建水等县市建设存栏8000头以上现代化种猪场及配套育肥场2至4个，发展生猪养殖合作家庭农场50个以上，预计实现年出栏商品肥猪100万头规模，建设年产30万吨饲料加工厂，项目总投资概算约20亿元。	18:13:29_x000D_ 【神农集团：拟20亿元投建红河州生猪全产业链项目】财联社4月18日电，神农集团公告，与红河哈尼族彝族自治州人民政府签订框架协议，携手打造红河州现代生猪养殖、屠宰及肉制品精深加工全产业链，在弥勒、泸西、开远、建水等县市建设存栏8000头以上现代化种猪场及配套育肥场2至4个，发展生猪养殖合作家庭农场50个以上，预计实现年出栏商品肥猪100万头规模，建设年产30万吨饲料加工厂，项目总投资概算约20亿元。
20230428	【科泰电源：大股东及一致行动人等拟合计减持不超3.5%股份】财联社4月28日电，科泰电源公告，股东科泰控股及其一致行动人姚瑛计划减持不超过640万股公司股份（占公司总股本的2%）；股东新疆荣旭泰及其一致行动人董事蔡行荣计划减持不超过480万股公司股份（占公司总股本的1.5%）。	19:11:43_x000D_ 【科泰电源：大股东及一致行动人等拟合计减持不超3.5%股份】财联社4月28日电，科泰电源公告，股东科泰控股及其一致行动人姚瑛计划减持不超过640万股公司股份（占公司总股本的2%）；股东新疆荣旭泰及其一致行动人董事蔡行荣计划减持不超过480万股公司股份（占公司总股本的1.5%）。
20230111	【中铁装配：子公司签署总金额约2.02亿元重大合同】财联社1月11日电，中铁装配公告，近日，公司全资子公司中铁装配科技(宿迁)有限公司、中铁装配式建筑科技有限公司分别与中铁建工集团有限公司关于“协同创新区-五期创新空间一标段、一期路网-西湖路三标段等四个EPC项目工程”签署了钢结构买卖合同、装配式建筑劳务服务合同，合同总金额(暂定)约为2.02亿元。中铁建工集团有限公司系公司直接控股股东，中铁建工集团有限公司为公司关联方，此次交易构成关联交易。	20:59_x000D_ 【中铁装配：子公司签署总金额约2.02亿元重大合同】财联社1月11日电，中铁装配公告，近日，公司全资子公司中铁装配科技(宿迁)有限公司、中铁装配式建筑科技有限公司分别与中铁建工集团有限公司关于“协同创新区-五期创新空间一标段、一期路网-西湖路三标段等四个EPC项目工程”签署了钢结构买卖合同、装配式建筑劳务服务合同，合同总金额(暂定)约为2.02亿元。中铁建工集团有限公司系公司直接控股股东，中铁建工集团有限公司为公司关联方，此次交易构成关联交易。
20230222	【海能达：目前公司指调业务正在使用Chatgpt相同的底层技术】财联社2月22日电，海能达在互动平台表示，目前，公司的指调业务正在使用Chatgpt相同的底层技术，探索在智能化警力信息上实现应用，可帮助智慧城市更好实现情指勤舆一体化的运行机制。	12:31_x000D_ 【海能达：目前公司指调业务正在使用Chatgpt相同的底层技术】财联社2月22日电，海能达在互动平台表示，目前，公司的指调业务正在使用Chatgpt相同的底层技术，探索在智能化警力信息上实现应用，可帮助智慧城市更好实现情指勤舆一体化的运行机制。
20230824	【日本福岛第一核电站启动核污染水排海】财联社8月24日电，日本福岛第一核电站当地时间24日13时启动核污染水排海。两年多来，福岛核污染水排海计划的正当性、合法性、安全性一直受到国际社会质疑。日方迄未解决国际社会关于核污染水净化装置长期可靠性、核污染水数据真实准确性、排海监测安排的有效性等重大关切。中方等利益攸关方多次指出，如果核污染水是安全的，就没有必要排海，如果不安全，就更不应该排海。日本强推核污染水排海不正当、不合理、不必要。	12:01:59_x000D_ 【日本福岛第一核电站启动核污染水排海】财联社8月24日电，日本福岛第一核电站当地时间24日13时启动核污染水排海。两年多来，福岛核污染水排海计划的正当性、合法性、安全性一直受到国际社会质疑。日方迄未解决国际社会关于核污染水净化装置长期可靠性、核污染水数据真实准确性、排海监测安排的有效性等重大关切。中方等利益攸关方多次指出，如果核污染水是安全的，就没有必要排海，如果不安全，就更不应该排海。日本强推核污染水排海不正当、不合理、不必要。
20230906	【神马股份：拟以0.6亿-1亿元回购公司股份】财联社9月6日电，神马股份公告，拟以0.6亿-1亿元回购股份，回购价格不超过10.56元/股。回购股份将在未来适宜时机用于股权激励或员工持股计划，或用于转换上市公司发行的可转换为股票的公司债券。	17:11:45_x000D_ 【神马股份：拟以0.6亿-1亿元回购公司股份】财联社9月6日电，神马股份公告，拟以0.6亿-1亿元回购股份，回购价格不超过10.56元/股。回购股份将在未来适宜时机用于股权激励或员工持股计划，或用于转换上市公司发行的可转换为股票的公司债券。
20230524	【我武生物：黄花蒿花粉变应原舌下滴剂扩展儿童适应症人群的药品补充申请获得批准】财联社5月24日电，我武生物公告，公司收到国家药品监督管理局核准签发的《药品补充申请批准通知书》，由公司提交的“黄花蒿花粉变应原舌下滴剂”扩展儿童适应症人群的药品补充申请获得批准。	17:07:40_x000D_ 【我武生物：黄花蒿花粉变应原舌下滴剂扩展儿童适应症人群的药品补充申请获得批准】财联社5月24日电，我武生物公告，公司收到国家药品监督管理局核准签发的《药品补充申请批准通知书》，由公司提交的“黄花蒿花粉变应原舌下滴剂”扩展儿童适应症人群的药品补充申请获得批准。
20230529	【隆基5月单晶硅片价格公示 平均价格下调约30%】财联社5月29日电，隆基5月单晶硅片价格公示，“单晶硅片P型M10 150μm厚度”单晶硅片价格由6.3元人民币下调至4.36元，降幅30.8%。“单晶硅片P型M6 150μm厚度”单晶硅片价格由至5.44元人民币下调至3.81元人民币，降幅30%。	18:59:49_x000D_ 【隆基5月单晶硅片价格公示 平均价格下调约30%】财联社5月29日电，隆基5月单晶硅片价格公示，“单晶硅片P型M10 150μm厚度”单晶硅片价格由6.3元人民币下调至4.36元，降幅30.8%。“单晶硅片P型M6 150μm厚度”单晶硅片价格由至5.44元人民币下调至3.81元人民币，降幅30%。
20230602	【远方信息：实控人之一致行动人拟减持不超0.37%股份】财联社6月2日电，远方信息公告，公司实控人潘建根、孟欣夫妇之一致行动人孟拯拟以集中竞价或大宗交易方式，减持公司股份不超过100万股（占公司总股本的0.37%）。	16:04:26_x000D_ 【远方信息：实控人之一致行动人拟减持不超0.37%股份】财联社6月2日电，远方信息公告，公司实控人潘建根、孟欣夫妇之一致行动人孟拯拟以集中竞价或大宗交易方式，减持公司股份不超过100万股（占公司总股本的0.37%）。
20230111	财联社1月11日电，联合光电接受机构调研时表示，截至目前，公司的毫米波雷达及相关产品、AR-HUD相关产品、车内投影产品已获得多家新能源汽车厂商定点。	21:12_x000D_ 财联社1月11日电，联合光电接受机构调研时表示，截至目前，公司的毫米波雷达及相关产品、AR-HUD相关产品、车内投影产品已获得多家新能源汽车厂商定点。
20230418	【GPT产业联盟正式成立】财联社4月18日电，2023全球元宇宙大会18号在北京举行。大会上，GPT产业联盟正式成立。GPT产业联盟由中国移动通信联合会、中国电信、中国移动、中国联通、中国广电等单位共同发起成立。根据介绍，接下来，GPT产业联盟将努力做到：探索智能涌现产生的机制和工程路径；发现智能时代开启原始创新机会；发明支撑智能商业价值涌现与流转的技术架构，致力于将人工智能力量打造成为造福人类、影响世界、影响未来的强大数字力量。 (上证报)	14:55:12_x000D_ 【GPT产业联盟正式成立】财联社4月18日电，2023全球元宇宙大会18号在北京举行。大会上，GPT产业联盟正式成立。GPT产业联盟由中国移动通信联合会、中国电信、中国移动、中国联通、中国广电等单位共同发起成立。根据介绍，接下来，GPT产业联盟将努力做到：探索智能涌现产生的机制和工程路径；发现智能时代开启原始创新机会；发明支撑智能商业价值涌现与流转的技术架构，致力于将人工智能力量打造成为造福人类、影响世界、影响未来的强大数字力量。 (上证报)
20230731	【蓝箭电子中签号出炉 共4.85万个】财联社7月31日电，蓝箭电子披露网上中签结果，中签号码共48500个，每个中签号码能认购500股蓝箭电子A股股票。	20:59:21_x000D_ 【蓝箭电子中签号出炉 共4.85万个】财联社7月31日电，蓝箭电子披露网上中签结果，中签号码共48500个，每个中签号码能认购500股蓝箭电子A股股票。
20230817	【石头科技：董事长提议5117.78万元-1.02亿元回购股份】《科创板日报》17日讯，石头科技公告，董事长提议5117.78万元-1.02亿元回购股份，回购价格不超过人民币435元/股。	18:32:57_x000D_ 【石头科技：董事长提议5117.78万元-1.02亿元回购股份】《科创板日报》17日讯，石头科技公告，董事长提议5117.78万元-1.02亿元回购股份，回购价格不超过人民币435元/股。
20230818	【国家金融监督管理总局对农业银行、民生银行、广发银行等开出大额罚单】财联社8月18日电，国家金融监督管理总局披露多份大额罚单。对中国农业银行股份有限公司没收违法所得并处罚款合计约4420万元。处罚原因包括，违规向房地产开发企业提供融资等；对中国民生银行股份有限公司罚款合计4780万元。处罚原因包括，规避委托贷款监管，违规利用委托债权投资业务向企业融资等。	17:15:59_x000D_ 【国家金融监督管理总局对农业银行、民生银行、广发银行等开出大额罚单】财联社8月18日电，国家金融监督管理总局披露多份大额罚单。对中国农业银行股份有限公司没收违法所得并处罚款合计约4420万元。处罚原因包括，违规向房地产开发企业提供融资等；对中国民生银行股份有限公司罚款合计4780万元。处罚原因包括，规避委托贷款监管，违规利用委托债权投资业务向企业融资等。
20230705	21:33 _x000D_ [[+_+]]_x000D_ 专享 专享_x000D_ 【风口研报·洞察】英伟达、AMD排队下单，这个方案有望成为主流AI训练芯片的标配，相关公司未来发展空间可观；AI调整后本轮行情会向哪些低位板块扩散 解锁直达	21:33 _x000D_ [[+_+]]_x000D_ 专享 专享_x000D_ 【风口研报·洞察】英伟达、AMD排队下单，这个方案有望成为主流AI训练芯片的标配，相关公司未来发展空间可观；AI调整后本轮行情会向哪些低位板块扩散 解锁直达>>
20230725	22:50 _x000D_ [[+_+]]_x000D_ 专享 专享_x000D_ 【电报解读】加快高效能电池系统热管理研发，2025年新能源汽车热管理市场规模或超900亿元，这家公司已规划468万套电池热管理产品产能 解锁直达>>	22:50 _x000D_ [[+_+]]_x000D_ 专享 专享_x000D_ 【电报解读】加快高效能电池系统热管理研发，2025年新能源汽车热管理市场规模或超900亿元，这家公司已规划468万套电池热管理产品产能 解锁直达>>
20230727	【三大指数全线翻绿 两市超3200只个股下跌】财联社7月27日电，指数冲高回落，沪指翻绿，深成指跌近0.25%，创业板指跌近0.1%。半导体芯片、电子商务、传媒等板块跌幅居前，两市下跌个股近3200只。	13:45:03_x000D_ 【三大指数全线翻绿 两市超3200只个股下跌】财联社7月27日电，指数冲高回落，沪指翻绿，深成指跌近0.25%，创业板指跌近0.1%。半导体芯片、电子商务、传媒等板块跌幅居前，两市下跌个股近3200只。
20230629	【三安光电：获得政府补助】财联社6月29日电，三安光电公告，全资子公司湖南三安半导体有限责任公司(简称“湖南三安”)收到湖南湘江新区管理委员会商务和市场监管局拨付设备购置补贴5.25亿元；收到湖南湘江新区管理委员会商务和市场监管局拨付的二期开工奖励2亿元；自2023年4月1日6月29日，公司及下属子公司收到其他与收益相关的政府补助款2671.59万元。	16:40:27_x000D_ 【三安光电：获得政府补助】财联社6月29日电，三安光电公告，全资子公司湖南三安半导体有限责任公司(简称“湖南三安”)收到湖南湘江新区管理委员会商务和市场监管局拨付设备购置补贴5.25亿元；收到湖南湘江新区管理委员会商务和市场监管局拨付的二期开工奖励2亿元；自2023年4月1日6月29日，公司及下属子公司收到其他与收益相关的政府补助款2671.59万元。
20230718	【廊坊发展：恒大地产持有的公司20%股份被轮候冻结】财联社7月18日电，廊坊发展公告，因申请执行人中国农业银行股份有限公司福清市支行与被执行人福清金碧置业有限公司、恒大地产集团有限公司金融借款合同纠纷一案，福建省福州市中级人民法院作出的执行裁定书已经发生法律效力，恒大地产持有的公司20%股份被轮候冻结。	18:39:21_x000D_ 【廊坊发展：恒大地产持有的公司20%股份被轮候冻结】财联社7月18日电，廊坊发展公告，因申请执行人中国农业银行股份有限公司福清市支行与被执行人福清金碧置业有限公司、恒大地产集团有限公司金融借款合同纠纷一案，福建省福州市中级人民法院作出的执行裁定书已经发生法律效力，恒大地产持有的公司20%股份被轮候冻结。
20230804	【川能动力：上半年净利润同比增长37.51%】财联社8月4日电，川能动力发布业绩快报，上半年净利润4.57亿元，同比增长37.51%。报告期内，公司风力发电量以及锂矿(基建矿)销售量较上年同期增长。	19:06:31_x000D_ 【川能动力：上半年净利润同比增长37.51%】财联社8月4日电，川能动力发布业绩快报，上半年净利润4.57亿元，同比增长37.51%。报告期内，公司风力发电量以及锂矿(基建矿)销售量较上年同期增长。
20230807	【主流家电企业积极参与家电回收 相关成熟资产有望独立上市】财联社8月7日电，近日，国家发改委、工信部、生态环境部联合发布关于组织开展第二批家电生产企业回收目标责任制行动有关工作的通知。8月6日，长虹、美的等多家家电企业相关负责人对记者表示，将积极参与第二批责任制企业的申报工作。目前美的、长虹、格力电器均建立了相应回收产业链子公司，且向外界传递出分拆旗下成熟资产上市意愿。	07:09:11_x000D_ 【主流家电企业积极参与家电回收 相关成熟资产有望独立上市】财联社8月7日电，近日，国家发改委、工信部、生态环境部联合发布关于组织开展第二批家电生产企业回收目标责任制行动有关工作的通知。8月6日，长虹、美的等多家家电企业相关负责人对记者表示，将积极参与第二批责任制企业的申报工作。目前美的、长虹、格力电器均建立了相应回收产业链子公司，且向外界传递出分拆旗下成熟资产上市意愿。
20230801	【精进电动：公司是小鹏汽车的供应商 公司的产品主要配套G3和P7车型】财联社8月1日电，精进电动在互动平台表示，公司是小鹏汽车的供应商，公司的产品主要配套G3和P7车型。除以上两个车型外，和小鹏没有新项目的合作。	09:47:53_x000D_ 【精进电动：公司是小鹏汽车的供应商 公司的产品主要配套G3和P7车型】财联社8月1日电，精进电动在互动平台表示，公司是小鹏汽车的供应商，公司的产品主要配套G3和P7车型。除以上两个车型外，和小鹏没有新项目的合作。
20230307	【华为与润和软件等4家伙伴企业举行政务一网通军团核心合作伙伴签约】财联社3月7日电，华为官网今日消息，昨日，华为与4家伙伴企业举行政务一网通军团核心合作伙伴签约仪式。参加本次签约的有4家伙伴企业，分别是宝德计算机系统股份有限公司、软通智慧科技有限公司、润和软件股份有限公司、中航信息产业集团股份有限公司。据悉，双方将围绕政务与城市数字化场景打造解决方案能力和端到端的商业能力，构建咨询规划、解决方案、集成、服务、运营等端到端的能力体系。	13:31_x000D_ 【华为与润和软件等4家伙伴企业举行政务一网通军团核心合作伙伴签约】财联社3月7日电，华为官网今日消息，昨日，华为与4家伙伴企业举行政务一网通军团核心合作伙伴签约仪式。参加本次签约的有4家伙伴企业，分别是宝德计算机系统股份有限公司、软通智慧科技有限公司、润和软件股份有限公司、中航信息产业集团股份有限公司。据悉，双方将围绕政务与城市数字化场景打造解决方案能力和端到端的商业能力，构建咨询规划、解决方案、集成、服务、运营等端到端的能力体系。
20230321	【药明康德：今年不会在资本市场进行融资】财联社3月21日电，药明康德相关人士在今日业绩会上表示，公司今年不会在资本市场进行融资，有其它多种融资方式可满足公司需求。对于2019年发行的3亿美元可转债，在目前已转股96.2%基础上，公司将在4月初完成剩余可转债现金赎回。因此二季度开始归母净利润不再受可转债公允价值波动影响。小财注：2021年和2022年，药明康德可转债衍生金融工具部分的公允价值变动分别为损失10.01亿元和收益5.09亿元。（记者 王俊仙 卢阿峰）	11:17_x000D_ 【药明康德：今年不会在资本市场进行融资】财联社3月21日电，药明康德相关人士在今日业绩会上表示，公司今年不会在资本市场进行融资，有其它多种融资方式可满足公司需求。对于2019年发行的3亿美元可转债，在目前已转股96.2%基础上，公司将在4月初完成剩余可转债现金赎回。因此二季度开始归母净利润不再受可转债公允价值波动影响。小财注：2021年和2022年，药明康德可转债衍生金融工具部分的公允价值变动分别为损失10.01亿元和收益5.09亿元。（记者 王俊仙 卢阿峰）
20230324	【招商银行：2022年净利润1380.12亿元 每股现金分红1.73元】财联社3月24日电，招商银行公告，2022年净利润1380.12亿元，同比增长15.08%，每股现金分红1.738元。	19:10_x000D_ 【招商银行：2022年净利润1380.12亿元 每股现金分红1.73元】财联社3月24日电，招商银行公告，2022年净利润1380.12亿元，同比增长15.08%，每股现金分红1.738元。
20230214	【深南电路：已配合客户完成新一代EGS平台用PCB样品研发并具备批量生产能力】财联社2月14日电，深南电路近日在机构调研时表示，目前，公司已配合客户完成新一代EGS平台用PCB样品研发并具备批量生产能力，现已逐步进入中小批量供应阶段。2022年第三季度以来，受EGS平台切换进展延期及下游市场需求下滑影响，公司PCB业务数据中心领域短期内承压。此外，公司表示，目前，汽车电子领域订单保持稳定增长。	09:25_x000D_ 【深南电路：已配合客户完成新一代EGS平台用PCB样品研发并具备批量生产能力】财联社2月14日电，深南电路近日在机构调研时表示，目前，公司已配合客户完成新一代EGS平台用PCB样品研发并具备批量生产能力，现已逐步进入中小批量供应阶段。2022年第三季度以来，受EGS平台切换进展延期及下游市场需求下滑影响，公司PCB业务数据中心领域短期内承压。此外，公司表示，目前，汽车电子领域订单保持稳定增长。
20230209	【南京医药：发行中期票据获准注册】财联社2月9日电，南京医药公告，公司于近日收到交易商协会《接受注册通知书》，交易商协会决定接受公司中期票据注册，注册金额为50亿元，注册额度自通知书落款之日（2023年2月1日）起2年内有效。	16:25_x000D_ 【南京医药：发行中期票据获准注册】财联社2月9日电，南京医药公告，公司于近日收到交易商协会《接受注册通知书》，交易商协会决定接受公司中期票据注册，注册金额为50亿元，注册额度自通知书落款之日（2023年2月1日）起2年内有效。
20230303	【平煤股份：总经理、副总经理辞职】财联社3月3日电，平煤股份公告，王新义因工作变动原因辞去公司总经理职务，王新义辞去总经理职务后，仍担任公司董事、战略委员会委员职务。张天良因工作变动原因辞去公司副总经理职务。	17:29_x000D_ 【平煤股份：总经理、副总经理辞职】财联社3月3日电，平煤股份公告，王新义因工作变动原因辞去公司总经理职务，王新义辞去总经理职务后，仍担任公司董事、战略委员会委员职务。张天良因工作变动原因辞去公司副总经理职务。
20230218	【独家｜中国电信：大模型研发取得阶段性成果 积极关注产业版ChatGPT】《科创板日报》18日讯，《科创板日报》记者独家获悉，中国电信已全面布局大模型技术研发并取得阶段性成果，积极关注产业版“ChatGPT”并已具备相关技术研发基础，初步具备文章续写、主题写作、同义句生成、多轮对话和长文本摘要等能力，旨在打造面向电信领域的产业版生成式技术的端到端产品化能力。（记者冯军、徐赐豪）	10:12_x000D_ 【独家｜中国电信：大模型研发取得阶段性成果 积极关注产业版ChatGPT】《科创板日报》18日讯，《科创板日报》记者独家获悉，中国电信已全面布局大模型技术研发并取得阶段性成果，积极关注产业版“ChatGPT”并已具备相关技术研发基础，初步具备文章续写、主题写作、同义句生成、多轮对话和长文本摘要等能力，旨在打造面向电信领域的产业版生成式技术的端到端产品化能力。（记者冯军、徐赐豪）
20230516	20:40 _x000D_ [[+_+]]_x000D_ 专享 专享_x000D_ 【风口研报·行业】低估值+高股息+现金流改善+一带一路助力，分析师强call该行业具备价值重估潜力，对标产业资本定价有接近翻倍空间；这家公司推出的小额消费单	20:40 _x000D_ [[+_+]]_x000D_ 专享 专享_x000D_ 【风口研报·行业】低估值+高股息+现金流改善+一带一路助力，分析师强call该行业具备价值重估潜力，对标产业资本定价有接近翻倍空间；这家公司推出的小额消费单品大卖，抖音渠道4月同比增6倍 解锁直达>>
20230526	【新华网与中公教育在京签署合作协议】财联社5月26日电，新华网26日与中公教育签署合作协议。新华网将充分发挥自身在AI、元宇宙、数字人、AIGC等领域的技术优势，以数字媒体为核心，和中公教育共同打造教育AI“数智人”，创新“技术+内容”新型教育培训解决方案；助力中公教育打造“中公职聘”精准就业服务平台。	11:58:28_x000D_ 【新华网与中公教育在京签署合作协议】财联社5月26日电，新华网26日与中公教育签署合作协议。新华网将充分发挥自身在AI、元宇宙、数字人、AIGC等领域的技术优势，以数字媒体为核心，和中公教育共同打造教育AI“数智人”，创新“技术+内容”新型教育培训解决方案；助力中公教育打造“中公职聘”精准就业服务平台。
20230815	【驰援许家印的纽顿集团：天津起家 三年零营收】财联社8月15日电，昨日晚间，纽顿集团以对恒大汽车进行5亿美元的战投而被关注。记者在查阅了资料后发现，这家总部位于阿联酋迪拜的电动汽车企业创始人为41岁的中国人吴楠。纽顿的历史可以追溯到2014年，其前身为ICONIQ（艾康尼克）。在翻阅纽顿近三年（2020年、2021年、2022年）的年报后发现，2020年、2021年和2022年，纽顿均无营收，而其同期的归母净利润亏损分别为1191万美元、1239万美元和4072万美元，净利润亏损分别为1265万美元、1306万美元和4125万美元，资产负债率从2020年的1601.88%骤降至2022年的20.55%。 (澎湃新闻)	08:40:47_x000D_ 【驰援许家印的纽顿集团：天津起家 三年零营收】财联社8月15日电，昨日晚间，纽顿集团以对恒大汽车进行5亿美元的战投而被关注。记者在查阅了资料后发现，这家总部位于阿联酋迪拜的电动汽车企业创始人为41岁的中国人吴楠。纽顿的历史可以追溯到2014年，其前身为ICONIQ（艾康尼克）。在翻阅纽顿近三年（2020年、2021年、2022年）的年报后发现，2020年、2021年和2022年，纽顿均无营收，而其同期的归母净利润亏损分别为1191万美元、1239万美元和4072万美元，净利润亏损分别为1265万美元、1306万美元和4125万美元，资产负债率从2020年的1601.88%骤降至2022年的20.55%。 (澎湃新闻)
20230628	【汤姆猫：计划自建与现有用户需求较为匹配的垂直领域模型】财联社6月28日电，汤姆猫接受机构调研时表示，目前，生成式人工智能各类预训练语言通识大模型涵盖范围广泛，公司计划自建与现有用户需求较为匹配的垂直领域的模型，该垂直模型服务于公司在陪伴、趣味教育等垂直领域打造的人工智能交互终端产品，帮助公司的人工智能交互终端产品能更高效地服务用户。	09:05:02_x000D_ 【汤姆猫：计划自建与现有用户需求较为匹配的垂直领域模型】财联社6月28日电，汤姆猫接受机构调研时表示，目前，生成式人工智能各类预训练语言通识大模型涵盖范围广泛，公司计划自建与现有用户需求较为匹配的垂直领域的模型，该垂直模型服务于公司在陪伴、趣味教育等垂直领域打造的人工智能交互终端产品，帮助公司的人工智能交互终端产品能更高效地服务用户。
20230704	【映翰通：智能配电网状态监测系统已在马来西亚等国家正式出货】财联社7月4日电，映翰通近日在机构调研中表示，除工业物联网通信产品规模销售外，智能配电网状态监测系统已在马来西亚、泰国、土耳其等国家正式出货，智能售货控制系统产品也有部分项目落地海外。	09:31:41_x000D_ 【映翰通：智能配电网状态监测系统已在马来西亚等国家正式出货】财联社7月4日电，映翰通近日在机构调研中表示，除工业物联网通信产品规模销售外，智能配电网状态监测系统已在马来西亚、泰国、土耳其等国家正式出货，智能售货控制系统产品也有部分项目落地海外。
20230518	【经济日报：不必过度关注股市成交量】财联社5月18日电，经济日报评论文章指出，4月3日至5月10日，A股市场逐步回暖，连续24个交易日成交量突破万亿元，部分投资者情绪高涨，热切期待牛市的到来。但紧接着，市场量能骤然变化，接连多日萎缩至9000亿元左右，部分投资者情绪又跟着跌宕起伏，担忧就此跌入熊市。一个理性的市场，并不在于成交量有多巨大，而在于有多少长线资金愿意停留驻足，进行价值的发现和培育。对于投资者而言，应坚守长期投资、价值投资信念，做时间的朋友，共同守护健康、可持续、有价值的A股市场。	06:15:31_x000D_ 【经济日报：不必过度关注股市成交量】财联社5月18日电，经济日报评论文章指出，4月3日至5月10日，A股市场逐步回暖，连续24个交易日成交量突破万亿元，部分投资者情绪高涨，热切期待牛市的到来。但紧接着，市场量能骤然变化，接连多日萎缩至9000亿元左右，部分投资者情绪又跟着跌宕起伏，担忧就此跌入熊市。一个理性的市场，并不在于成交量有多巨大，而在于有多少长线资金愿意停留驻足，进行价值的发现和培育。对于投资者而言，应坚守长期投资、价值投资信念，做时间的朋友，共同守护健康、可持续、有价值的A股市场。
20230224	【东数西算一体化算力服务平台正式上线运营 宁夏瞄准ChatGPT运算能力开建GPU大算力基地】财联社2月24日电，东数西算一体化算力服务平台24日上午在宁夏银川发布，正式上线运营。随着“东数西算”战略加速落地，宁夏瞄准目前最稀缺、刚需迫切的ChatGPT运算能力，已在宁夏中卫开工建设GPU大算力基地，建成后，将会接入东数西算一体化交易平台，以支撑国内人工智能运算平台急需的大算力服务。	12:25_x000D_ 【东数西算一体化算力服务平台正式上线运营 宁夏瞄准ChatGPT运算能力开建GPU大算力基地】财联社2月24日电，东数西算一体化算力服务平台24日上午在宁夏银川发布，正式上线运营。随着“东数西算”战略加速落地，宁夏瞄准目前最稀缺、刚需迫切的ChatGPT运算能力，已在宁夏中卫开工建设GPU大算力基地，建成后，将会接入东数西算一体化交易平台，以支撑国内人工智能运算平台急需的大算力服务。
20230418	【泽璟制药：注射用盐酸ZG0895用于治疗晚期实体瘤的临床试验获得批准】财联社4月18日电，泽璟制药公告，公司于近日收到国家药监局核准签发的《药物临床试验批准通知书》，注射用盐酸ZG0895用于治疗晚期实体瘤的临床试验获得批准。	18:44:03_x000D_ 【泽璟制药：注射用盐酸ZG0895用于治疗晚期实体瘤的临床试验获得批准】财联社4月18日电，泽璟制药公告，公司于近日收到国家药监局核准签发的《药物临床试验批准通知书》，注射用盐酸ZG0895用于治疗晚期实体瘤的临床试验获得批准。
20230627	07:13 _x000D_ [[+_+]]_x000D_ 专享 专享_x000D_ 【研选】国内AI算力建设也即将迎来上行周期，交换机是核心受益品种；新疆兵团最大电网，石河子唯一合法能源供应商，分析师看好公司未来持续的电量及装机成长性，当前	07:13 _x000D_ [[+_+]]_x000D_ 专享 专享_x000D_ 【研选】国内AI算力建设也即将迎来上行周期，交换机是核心受益品种；新疆兵团最大电网，石河子唯一合法能源供应商，分析师看好公司未来持续的电量及装机成长性，当前被明显低估 解锁直达>>
20230706	【博世科：签订海外供货及配套技术服务合同】财联社7月6日电，博世科公告，公司此前公告，中标海外某纸业公司烧碱及废水处理装备供货及配套技术服务项目。近日，公司与该海外纸业公司签订了烧碱装备供货及配套技术服务合同，合同价格约合人民币2.51亿元-2.92亿元；签订了废水处理装备供货及配套技术服务合同，合同价格约合人民币0.88亿元-1.12亿元，共计约合人民币3.39亿元-4.04亿元。	19:16:30_x000D_ 【博世科：签订海外供货及配套技术服务合同】财联社7月6日电，博世科公告，公司此前公告，中标海外某纸业公司烧碱及废水处理装备供货及配套技术服务项目。近日，公司与该海外纸业公司签订了烧碱装备供货及配套技术服务合同，合同价格约合人民币2.51亿元-2.92亿元；签订了废水处理装备供货及配套技术服务合同，合同价格约合人民币0.88亿元-1.12亿元，共计约合人民币3.39亿元-4.04亿元。
20230217	【山西汾酒：对发展区公司1#成装车间工艺设备配套项目新增生产线及附属设备项目立项】财联社2月17日电，山西汾酒公告，拟对发展区公司1#成装车间工艺设备配套项目新增生产线及附属设备项目立项，资金来源由发展区公司自筹，预计总投资额为4460.7万元。	15:44_x000D_ 【山西汾酒：对发展区公司1#成装车间工艺设备配套项目新增生产线及附属设备项目立项】财联社2月17日电，山西汾酒公告，拟对发展区公司1#成装车间工艺设备配套项目新增生产线及附属设备项目立项，资金来源由发展区公司自筹，预计总投资额为4460.7万元。
20230212	【汤姆猫：股东王健因股票内幕交易遭罚款300万元】财联社2月12日电，汤姆猫公告，公司股东王健近日收到由浙江证监局下发的《行政处罚决定书》，因涉嫌股票内幕交易被处以300万元罚款。王健内幕交易“金科文化（证券简称后变更为汤姆猫）”共亏损230.45万元。《行政处罚决定书》的事项内容仅涉及王健个人，不会对公司日常经营、业务、财务状况造成影响。	17:02_x000D_ 【汤姆猫：股东王健因股票内幕交易遭罚款300万元】财联社2月12日电，汤姆猫公告，公司股东王健近日收到由浙江证监局下发的《行政处罚决定书》，因涉嫌股票内幕交易被处以300万元罚款。王健内幕交易“金科文化（证券简称后变更为汤姆猫）”共亏损230.45万元。《行政处罚决定书》的事项内容仅涉及王健个人，不会对公司日常经营、业务、财务状况造成影响。
20230320	【用友网络快速跳水触及跌停】财联社3月20日电，用友网络快速跳水触及跌停，成交金额超7亿。	09:34_x000D_ 【用友网络快速跳水触及跌停】财联社3月20日电，用友网络快速跳水触及跌停，成交金额超7亿。
20230407	【合盛硅业：已完整掌握SiC原料合成等全产业链核心工艺技术】财联社4月7日电，合盛硅业在互动平台表示，目前子公司“合盛新材料”2万片宽禁带半导体碳化硅衬底及外延片产业化生产线项目已通过验收，并具备量产能力，产品已经得到国内多家下游器件客户的验证，并已销售日韩、欧美客户。目前公司完整掌握了SiC原料合成、晶体生长、衬底加工以及晶片外延的全产业链核心工艺技术，在关键生产材料如多孔石墨、涂层材料上也已有所突破。	16:21:03_x000D_ 【合盛硅业：已完整掌握SiC原料合成等全产业链核心工艺技术】财联社4月7日电，合盛硅业在互动平台表示，目前子公司“合盛新材料”2万片宽禁带半导体碳化硅衬底及外延片产业化生产线项目已通过验收，并具备量产能力，产品已经得到国内多家下游器件客户的验证，并已销售日韩、欧美客户。目前公司完整掌握了SiC原料合成、晶体生长、衬底加工以及晶片外延的全产业链核心工艺技术，在关键生产材料如多孔石墨、涂层材料上也已有所突破。
20230421	【王廷科任中国人民保险集团党委书记】财联社4月21日电，中国人保集团官网消息，4月21日下午，中国人民保险集团股份有限公司召开干部会议。中央组织部有关负责同志宣布了中央决定：王廷科同志任中国人民保险集团股份有限公司党委书记。	16:11:20_x000D_ 【王廷科任中国人民保险集团党委书记】财联社4月21日电，中国人保集团官网消息，4月21日下午，中国人民保险集团股份有限公司召开干部会议。中央组织部有关负责同志宣布了中央决定：王廷科同志任中国人民保险集团股份有限公司党委书记。
20230424	【华测检测：子公司拟6.7亿元投资实施华测检测长三角总部项目】财联社4月24日电，华测检测公告，全资子公司杭州华测拟与杭州钱塘新区管理委员会签署《华测检测长三角总部项目投资意向协议》，项目主要建设内容为投资实施华测检测长三角总部项目，建设包括消费品、芯片、食农、环境、建工、计量、医药医学等多领域检测的产品线，项目计划总投资约6.7亿元。	16:43:43_x000D_ 【华测检测：子公司拟6.7亿元投资实施华测检测长三角总部项目】财联社4月24日电，华测检测公告，全资子公司杭州华测拟与杭州钱塘新区管理委员会签署《华测检测长三角总部项目投资意向协议》，项目主要建设内容为投资实施华测检测长三角总部项目，建设包括消费品、芯片、食农、环境、建工、计量、医药医学等多领域检测的产品线，项目计划总投资约6.7亿元。
20230210	【华为：在与ChatGPT相关的大模型领域早有布局 正通过建立联合体推动产业化】《科创板日报》10日讯，对于华为在类似ChatGPT方向上的布局，华为计算产品线相关负责人表示，公司2020年开始在大模型开始有布局，2021年发布了鹏城盘古大模型，是业界首个千亿级生成和理解中文NLP大模型。在大模型产业化方面，华为已发起了智能遥感开源生态联合体、多模态人工智能产业联合体，智能流体力学产业联合体等。华为将以联合体的模式把科研院所、产业厂商等结合起来，更好地让大模型产业形成正向的闭环回路。（记者 黄心怡）	11:21_x000D_ 【华为：在与ChatGPT相关的大模型领域早有布局 正通过建立联合体推动产业化】《科创板日报》10日讯，对于华为在类似ChatGPT方向上的布局，华为计算产品线相关负责人表示，公司2020年开始在大模型开始有布局，2021年发布了鹏城盘古大模型，是业界首个千亿级生成和理解中文NLP大模型。在大模型产业化方面，华为已发起了智能遥感开源生态联合体、多模态人工智能产业联合体，智能流体力学产业联合体等。华为将以联合体的模式把科研院所、产业厂商等结合起来，更好地让大模型产业形成正向的闭环回路。（记者 黄心怡）
20230207	14:15 _x000D_ [[+_+]]_x000D_ 专享 专享_x000D_ 【盘中宝】多条GW级别生产线有望于今年招标，钙钛矿被视为具有革命性的新材料，这家公司钙钛矿领域已布局两个新项目 解锁直达>>	14:15 _x000D_ [[+_+]]_x000D_ 专享 专享_x000D_ 【盘中宝】多条GW级别生产线有望于今年招标，钙钛矿被视为具有革命性的新材料，这家公司钙钛矿领域已布局两个新项目 解锁直达>>
20230214	【莱伯泰科：2022年净利同比降33%】《科创板日报》14日讯，莱伯泰科发布业绩快报，2022年营业收入为3.57亿元，同比下滑3.3%；净利润4641.28万元，同比下滑33.14%；基本每股收益0.69元。2022年新冠疫情持续多发，对公司整体的业务拓展、订单验收、产线运转等方面都带来一定影响，公司整体收入情况未及预期。	18:13_x000D_ 【莱伯泰科：2022年净利同比降33%】《科创板日报》14日讯，莱伯泰科发布业绩快报，2022年营业收入为3.57亿元，同比下滑3.3%；净利润4641.28万元，同比下滑33.14%；基本每股收益0.69元。2022年新冠疫情持续多发，对公司整体的业务拓展、订单验收、产线运转等方面都带来一定影响，公司整体收入情况未及预期。
20230619	【美力科技：长江资本拟减持不超4.0936%】财联社6月19日电，美力科技公告，长江资本拟减持不超4.0936%。	21:35:46_x000D_ 【美力科技：长江资本拟减持不超4.0936%】财联社6月19日电，美力科技公告，长江资本拟减持不超4.0936%。
20230628	【胡锡进选股套路曝光：几百亿的大盘股 目前处于它们的价值低位】财联社6月28日电，胡锡进表示，刚进股市，我就像在一个雷区里一样，小心翼翼迈着最初几步。我买的几只股票都是盘子大的，最小的市值也是几百亿的，而且它们都有过高点，目前处于它们的价值低位。我太忙了，不可能仔细研究股市里的各种知识和技术，要慢慢来。我现在遵循的就是最基本的规律，我鼓励自己说，最基本规律可能也是最可靠的。	17:08:13_x000D_ 【胡锡进选股套路曝光：几百亿的大盘股 目前处于它们的价值低位】财联社6月28日电，胡锡进表示，刚进股市，我就像在一个雷区里一样，小心翼翼迈着最初几步。我买的几只股票都是盘子大的，最小的市值也是几百亿的，而且它们都有过高点，目前处于它们的价值低位。我太忙了，不可能仔细研究股市里的各种知识和技术，要慢慢来。我现在遵循的就是最基本的规律，我鼓励自己说，最基本规律可能也是最可靠的。
20230402	【中信证券：全年第二个关键做多窗口料将在4月开启】财联社4月2日电，中信证券研报指出，基本面、估值、风险偏好共振上修的市场环境下，A股料将在4月打开全年第二个关键做多窗口；财报业绩驱动将取代主题炒作，成为阶段性主线，建议关注制造中的新能源、基建、一带一路出口中的细分领域；年度主线方面，受益于全球流动性拐点的创新药、医疗基建以及科创类企业将在二季度轮动，数字经济产业分化下，上游芯片、云计算基础设施等业绩有支撑的细分领域更加受益；年度主线和阶段性主线将接力并轮动。	15:01:33_x000D_ 【中信证券：全年第二个关键做多窗口料将在4月开启】财联社4月2日电，中信证券研报指出，基本面、估值、风险偏好共振上修的市场环境下，A股料将在4月打开全年第二个关键做多窗口；财报业绩驱动将取代主题炒作，成为阶段性主线，建议关注制造中的新能源、基建、一带一路出口中的细分领域；年度主线方面，受益于全球流动性拐点的创新药、医疗基建以及科创类企业将在二季度轮动，数字经济产业分化下，上游芯片、云计算基础设施等业绩有支撑的细分领域更加受益；年度主线和阶段性主线将接力并轮动。
20230328	【同花顺股价创新高后实控人等拟减持逾8% 董事长回应怎么看公司估值】财联社3月28日电，在3月27日收盘后举行的同花顺2022年度报告业绩说明会上，易峥在回答记者关于公司股价创出历史新高后如何看待公司估值的提问时表示：“那我说你就卖了。” (澎湃新闻)	09:18_x000D_ 【同花顺股价创新高后实控人等拟减持逾8% 董事长回应怎么看公司估值】财联社3月28日电，在3月27日收盘后举行的同花顺2022年度报告业绩说明会上，易峥在回答记者关于公司股价创出历史新高后如何看待公司估值的提问时表示：“那我说你就卖了。” (澎湃新闻)
20230412	【龙虎榜|光线传媒今日涨停 二机构合计净买入1.31亿元】财联社4月12日电，光线传媒今日涨停，龙虎榜数据显示，深股通买入9944.71万元并卖出2.13亿元，二机构合计净买入1.31亿元，一机构净卖出1.01亿元，长江证券上海分公司买入3.84亿元。	16:54:50_x000D_ 【龙虎榜|光线传媒今日涨停 二机构合计净买入1.31亿元】财联社4月12日电，光线传媒今日涨停，龙虎榜数据显示，深股通买入9944.71万元并卖出2.13亿元，二机构合计净买入1.31亿元，一机构净卖出1.01亿元，长江证券上海分公司买入3.84亿元。
20230714	11:09 _x000D_ [[+_+]]_x000D_ 专享 专享_x000D_ 【盘中宝】城市NOA迎来快速落地期，智能驾驶进展加速，行业迎技术、法规、用户接受度三重拐点，这家公司主导的相关项目已完成车辆环境接口调试等工作 解锁直达>>	11:09 _x000D_ [[+_+]]_x000D_ 专享 专享_x000D_ 【盘中宝】城市NOA迎来快速落地期，智能驾驶进展加速，行业迎技术、法规、用户接受度三重拐点，这家公司主导的相关项目已完成车辆环境接口调试等工作 解锁直达>>
20230717	【银信科技：经营情况未发生重大变化】财联社7月17日电，银信科技披露交易异常波动公告，公司目前的经营情况及内外部经营环境未发生重大变化；经核查，公司、控股股东和实际控制人不存在关于本公司的应披露而未披露的重大事项，也不存在处于筹划阶段的重大事项。	16:38:09_x000D_ 【银信科技：经营情况未发生重大变化】财联社7月17日电，银信科技披露交易异常波动公告，公司目前的经营情况及内外部经营环境未发生重大变化；经核查，公司、控股股东和实际控制人不存在关于本公司的应披露而未披露的重大事项，也不存在处于筹划阶段的重大事项。
20230205	【鲁西化工：目前双酚A一期工程已建成投产 有机硅等其他项目正在有序进行】财联社2月5日电，鲁西化工接受机构调研时表示，公司统筹推进在建续建项目和技改项目，实行周调度、月调度会议机制，实行公司领导成员分包项目建设的制度，协调资源解决问题，现场督查落实项目进展，确保项目建设安全和质量的同时，争取项目进度。目前双酚A一期工程已建成投产，己内酰胺·尼龙6、有机硅等其他项目正在有序进行。	15:54_x000D_ 【鲁西化工：目前双酚A一期工程已建成投产 有机硅等其他项目正在有序进行】财联社2月5日电，鲁西化工接受机构调研时表示，公司统筹推进在建续建项目和技改项目，实行周调度、月调度会议机制，实行公司领导成员分包项目建设的制度，协调资源解决问题，现场督查落实项目进展，确保项目建设安全和质量的同时，争取项目进度。目前双酚A一期工程已建成投产，己内酰胺·尼龙6、有机硅等其他项目正在有序进行。
20230113	财联社1月13日电，浙江证监局决定对荣盛石化股份有限公司及相关人员采取出具警示函措施。	16:30_x000D_ 财联社1月13日电，浙江证监局决定对荣盛石化股份有限公司及相关人员采取出具警示函措施。
20230702	【中国重汽：预计上半年净利润同比增长45%-65%】财联社7月2日电，中国重汽公告，预计上半年净利润4.65亿元-5.29亿元，同比增长45%-65%；报告期内，受益于国内宏观经济稳中向好，以及海外市场需求提升，重卡行业复苏明显，产品销量实现较好增长。	16:20:15_x000D_ 【中国重汽：预计上半年净利润同比增长45%-65%】财联社7月2日电，中国重汽公告，预计上半年净利润4.65亿元-5.29亿元，同比增长45%-65%；报告期内，受益于国内宏观经济稳中向好，以及海外市场需求提升，重卡行业复苏明显，产品销量实现较好增长。
20230718	【龙芯中科：控股股东拟以500万元至1000万元增持公司股份】《科创板日报》18日讯，龙芯中科公告，控股股东天童芯源基于对公司未来发展的信心和对公司长期投资价值的认可，拟增持股份合计金额不低于500万元且不高于1000万元。	18:25:51_x000D_ 【龙芯中科：控股股东拟以500万元至1000万元增持公司股份】《科创板日报》18日讯，龙芯中科公告，控股股东天童芯源基于对公司未来发展的信心和对公司长期投资价值的认可，拟增持股份合计金额不低于500万元且不高于1000万元。
20230828	【今世缘：上半年净利润同比增长26.7%】财联社8月28日电，今世缘公告，上半年净利润20.5亿元，同比增长26.7%。	16:54:57_x000D_ 【今世缘：上半年净利润同比增长26.7%】财联社8月28日电，今世缘公告，上半年净利润20.5亿元，同比增长26.7%。
20230828	【贝泰妮：上半年净利润4.5亿元 同比增13.91%】财联社8月28日电，贝泰妮公告，公司2023年半年度实现营业收入为23.68亿元，同比增长15.52%；归母净利润4.5亿元，同比增长13.91%；基本每股收益1.06元。	18:59:54_x000D_ 【贝泰妮：上半年净利润4.5亿元 同比增13.91%】财联社8月28日电，贝泰妮公告，公司2023年半年度实现营业收入为23.68亿元，同比增长15.52%；归母净利润4.5亿元，同比增长13.91%；基本每股收益1.06元。
20230911	2023.09.10 星期日 22:11 _x000D_ [[+_+]]_x000D_ 专享 专享_x000D_ 【电报解读】保险资金投资迎新规，将加大力度投资科技创新，这一半导体细分领域市场规模或超1100亿，这家企业与头部公司合作先进封	2023.09.10 星期日 22:11 _x000D_ [[+_+]]_x000D_ 专享 专享_x000D_ 【电报解读】保险资金投资迎新规，将加大力度投资科技创新，这一半导体细分领域市场规模或超1100亿，这家企业与头部公司合作先进封装项目 解锁直达>>
20230724	【早间公告：*ST正邦重整取得进展 确认双胞胎信达联合体为中选投资人】财联社7月24日电，*ST正邦7月24日早间披露公开招募和遴选重整投资人的进展：7月22日，公司接到管理人的通知，获悉正邦重整投资人遴选评审委员会确认双胞胎信达联合体(牵头投资人：江西双胞胎农业有限公司)为中选投资人。后续，管理人将与中选投资人及联合体内全部成员开展重整投资协议磋商及签订工作。截至目前，公司尚未与双胞胎信达联合体签订重整投资协议，重整的具体条款、款项支付安排等均尚未确定，重整投资协议涉及的债务清偿方式需进一步商谈确定。	08:07:54_x000D_ 【早间公告：*ST正邦重整取得进展 确认双胞胎信达联合体为中选投资人】财联社7月24日电，*ST正邦7月24日早间披露公开招募和遴选重整投资人的进展：7月22日，公司接到管理人的通知，获悉正邦重整投资人遴选评审委员会确认双胞胎信达联合体(牵头投资人：江西双胞胎农业有限公司)为中选投资人。后续，管理人将与中选投资人及联合体内全部成员开展重整投资协议磋商及签订工作。截至目前，公司尚未与双胞胎信达联合体签订重整投资协议，重整的具体条款、款项支付安排等均尚未确定，重整投资协议涉及的债务清偿方式需进一步商谈确定。
20230209	【科大讯飞：类ChatGPT技术将于5月落地 率先用于AI学习机】财联社2月9日电，记者从科大讯飞方面获悉，科大讯飞Al学习机将成为公司类ChatGPT技术率先落地的产品，并于今年5月发布。科大讯飞回应称，ChatGPT主要涉及到自然语言处理相关技术，属于认知智能领域的应用之一，公司在该方向技术和应用具备长期深厚的积累。 (红星新闻)	21:57_x000D_ 【科大讯飞：类ChatGPT技术将于5月落地 率先用于AI学习机】财联社2月9日电，记者从科大讯飞方面获悉，科大讯飞Al学习机将成为公司类ChatGPT技术率先落地的产品，并于今年5月发布。科大讯飞回应称，ChatGPT主要涉及到自然语言处理相关技术，属于认知智能领域的应用之一，公司在该方向技术和应用具备长期深厚的积累。 (红星新闻)
20230207	【新晨科技：股东蒋琳华拟减持不超过3%股份】财联社2月7日电，新晨科技公告，股东蒋琳华拟减持公司股份不超过900万股，即不超过公司总股本的3%。	17:58_x000D_ 【新晨科技：股东蒋琳华拟减持不超过3%股份】财联社2月7日电，新晨科技公告，股东蒋琳华拟减持公司股份不超过900万股，即不超过公司总股本的3%。
20230802	【鼎阳科技：发布新产品 丰富矢量网络分析仪类产品线】《科创板日报》2日讯，鼎阳科技公告，8月1日，公司公开发布SHN900A系列全双端口手持式矢量网络分析仪。SHN900A系列全双端口手持式矢量网络分析仪频率高达26.5GHz，集成矢量网络分析、时域分析、频谱分析、电缆和天线分析等多种功能于一体，专为便携和灵活测试而设计，可广泛应用于通信、天线基站、材料、器件、智能制造、汽车电子等诸多领域的现场测试、研发、生产、维修等场景。该产品的发布进一步丰富了公司矢量网络分析仪类产品线。	17:23:50_x000D_ 【鼎阳科技：发布新产品 丰富矢量网络分析仪类产品线】《科创板日报》2日讯，鼎阳科技公告，8月1日，公司公开发布SHN900A系列全双端口手持式矢量网络分析仪。SHN900A系列全双端口手持式矢量网络分析仪频率高达26.5GHz，集成矢量网络分析、时域分析、频谱分析、电缆和天线分析等多种功能于一体，专为便携和灵活测试而设计，可广泛应用于通信、天线基站、材料、器件、智能制造、汽车电子等诸多领域的现场测试、研发、生产、维修等场景。该产品的发布进一步丰富了公司矢量网络分析仪类产品线。
20230307	【外交部长谈中美关系：美方要中国打不还手骂不还口 我们办不到】财联社3月7日电，外交部长秦刚今日在记者会上表示，美方所谓的“竞争”，是全方位的遏制、打压，是你死我活的零和博弈。美方口口声声说遵守规则，但如同两位运动员在奥运田径场上赛跑，一方不是去想如何跑出自己的最好成绩，而总是要去绊倒对方，甚至想让对方去参加残奥会，这不是公平竞争，而是恶意的对抗，犯规了。美方实际上要中国打不还手、骂不还口，但这办不到。	10:48_x000D_ 【外交部长谈中美关系：美方要中国打不还手骂不还口 我们办不到】财联社3月7日电，外交部长秦刚今日在记者会上表示，美方所谓的“竞争”，是全方位的遏制、打压，是你死我活的零和博弈。美方口口声声说遵守规则，但如同两位运动员在奥运田径场上赛跑，一方不是去想如何跑出自己的最好成绩，而总是要去绊倒对方，甚至想让对方去参加残奥会，这不是公平竞争，而是恶意的对抗，犯规了。美方实际上要中国打不还手、骂不还口，但这办不到。
20230530	08:11 _x000D_ [[+_+]]_x000D_ 专享 专享_x000D_ 【点金互动易】AI+教育，率先打造AI课程系统和AI数字化实训系统等产品和解决方案，这家企业将人工智能、虚拟数字人等新兴技术应用于教育领域 解锁直达>>	08:11 _x000D_ [[+_+]]_x000D_ 专享 专享_x000D_ 【点金互动易】AI+教育，率先打造AI课程系统和AI数字化实训系统等产品和解决方案，这家企业将人工智能、虚拟数字人等新兴技术应用于教育领域 解锁直达>>
20230531	【祁连山：收到上交所中止审核通知】财联社5月31日电，祁连山公告，公司收到上交所审核通知，公司主板重组上市业务已中止审核。为保持审核期间评估资料的有效性，公司需要对此次交易涉及的相关资产进行加期评估，并补充提交相关文件。	19:32:29_x000D_ 【祁连山：收到上交所中止审核通知】财联社5月31日电，祁连山公告，公司收到上交所审核通知，公司主板重组上市业务已中止审核。为保持审核期间评估资料的有效性，公司需要对此次交易涉及的相关资产进行加期评估，并补充提交相关文件。
20230331	【工行副行长王景武：房地产不良贷款风险总体可控】财联社3月31日电，在工商银行2022年度业绩会上，工行副行长王景武表示，虽然去年因房地产市场调整房地产贷款不良率有所上升，但工行房地产业贷款占比较低，风险总体可控，不会对全行资产质量产生大的影响。此外，工行不良贷款认定标准比较审慎，房地产不良贷款情况已经得到全面、充分反映，也计提了充分的拨备。随着金融16条等措施落地实施，预计房地产领域的风险也将逐步得到化解。(财联社记者 高萍）	13:58_x000D_ 【工行副行长王景武：房地产不良贷款风险总体可控】财联社3月31日电，在工商银行2022年度业绩会上，工行副行长王景武表示，虽然去年因房地产市场调整房地产贷款不良率有所上升，但工行房地产业贷款占比较低，风险总体可控，不会对全行资产质量产生大的影响。此外，工行不良贷款认定标准比较审慎，房地产不良贷款情况已经得到全面、充分反映，也计提了充分的拨备。随着金融16条等措施落地实施，预计房地产领域的风险也将逐步得到化解。(财联社记者 高萍）
20230311	【中信证券：硅谷银行流动性困境尚不足以引发金融海啸】财联社3月11日电，中信证券研报认为，美国硅谷银行困境的主因是美联储持续加息背景下流动性风险的暴露，不过硅谷银行的流动性压力未必意味着其将破产。诚然，市场恐慌情绪正在蔓延，但我们认为目前硅谷银行的流动性压力尚不至于发展到债务危机，也不足以引发金融海啸。美国高利率环境下金融体系的风险在逐步累积，美债收益率曲线倒挂与债市流动性不足等问题可能放大局部金融风险，未来局部性金融风险仍需防范。	09:29_x000D_ 【中信证券：硅谷银行流动性困境尚不足以引发金融海啸】财联社3月11日电，中信证券研报认为，美国硅谷银行困境的主因是美联储持续加息背景下流动性风险的暴露，不过硅谷银行的流动性压力未必意味着其将破产。诚然，市场恐慌情绪正在蔓延，但我们认为目前硅谷银行的流动性压力尚不至于发展到债务危机，也不足以引发金融海啸。美国高利率环境下金融体系的风险在逐步累积，美债收益率曲线倒挂与债市流动性不足等问题可能放大局部金融风险，未来局部性金融风险仍需防范。
20230530	07:56 _x000D_ [[+_+]]_x000D_ 专享 专享_x000D_ 【九点特供】华为与国际电联阿拉伯分支机构签署网安合作协议，这家华为供应商已发布AI网安产品；全球最大广告公司已与英伟达展开合作；汇聚了算力、数据、算法等AI	07:56 _x000D_ [[+_+]]_x000D_ 专享 专享_x000D_ 【九点特供】华为与国际电联阿拉伯分支机构签署网安合作协议，这家华为供应商已发布AI网安产品；全球最大广告公司已与英伟达展开合作；汇聚了算力、数据、算法等AI全要素，3项平台重点国家标准正式发布 解锁直达>>
20230601	【5月财新中国制造业PMI升至50.9 时隔两个月重回扩张区间】财联社6月1日电，今日公布的5月财新中国制造业采购经理指数（PMI）录得50.9，较4月回升1.4个百分点，时隔两个月重回扩张区间。	09:45:26_x000D_ 【5月财新中国制造业PMI升至50.9 时隔两个月重回扩张区间】财联社6月1日电，今日公布的5月财新中国制造业采购经理指数（PMI）录得50.9，较4月回升1.4个百分点，时隔两个月重回扩张区间。
20230611	【去年结婚人数创37年来新低 近9年结婚人数下降49.3%】财联社6月11日电，民政部最新发布的统计季报数据显示，2022年我国结婚人数为683.3万对。梳理数据发现，这一数据创下了1986年（民政部网站公布有1986年以来的数据）来的新低。同时，这也是自2013年达到1346.9万对的最高峰后，结婚人数连续9年下降。从数据来看，2022年结婚登记人数比上一年减少了80.3万对，下降10.5%。与2013年最高峰相比，9年来，我国结婚人数下降了49.3%，下降幅度近半。 (第一财经)	18:58:40_x000D_ 【去年结婚人数创37年来新低 近9年结婚人数下降49.3%】财联社6月11日电，民政部最新发布的统计季报数据显示，2022年我国结婚人数为683.3万对。梳理数据发现，这一数据创下了1986年（民政部网站公布有1986年以来的数据）来的新低。同时，这也是自2013年达到1346.9万对的最高峰后，结婚人数连续9年下降。从数据来看，2022年结婚登记人数比上一年减少了80.3万对，下降10.5%。与2013年最高峰相比，9年来，我国结婚人数下降了49.3%，下降幅度近半。 (第一财经)
20230820	【三部门：调整优化房地产信贷政策】财联社8月20日电，中国人民银行、金融监管总局、中国证监会联合召开金融支持实体经济和防范化解金融风险电视会议。会议强调，调整优化房地产信贷政策。要继续推动实体经济融资成本稳中有降，规范贷款利率定价秩序，统筹考虑增量、存量及其他金融产品价格关系。发挥好存款利率市场化调整机制的重要作用，增强金融支持实体经济的可持续性，切实发挥好金融在促消费、稳投资、扩内需中的积极作用。	15:05:25_x000D_ 【三部门：调整优化房地产信贷政策】财联社8月20日电，中国人民银行、金融监管总局、中国证监会联合召开金融支持实体经济和防范化解金融风险电视会议。会议强调，调整优化房地产信贷政策。要继续推动实体经济融资成本稳中有降，规范贷款利率定价秩序，统筹考虑增量、存量及其他金融产品价格关系。发挥好存款利率市场化调整机制的重要作用，增强金融支持实体经济的可持续性，切实发挥好金融在促消费、稳投资、扩内需中的积极作用。
20230516	【汇纳科技：将持续推进AI视觉分析、AI语音识别及NLP分析等相关技术的研发工作】财联社5月16日电，汇纳科技接受机构调研时称，目前，在产品研发方向上，公司将持续提升底层人工智能和大数据技术能力，一方面，不断加大数据样本的采集，扩大数据规模、丰富数据维度、细化数据颗粒度，另一方面不断挖掘数据价值，持续推出新的数据产品。尤其在AI领域的研发上，公司将持续推进AI视觉分析、AI语音识别及NLP分析等相关技术的研发工作，以及其在商业零售与政务等领域的场景化应用。	08:42:40_x000D_ 【汇纳科技：将持续推进AI视觉分析、AI语音识别及NLP分析等相关技术的研发工作】财联社5月16日电，汇纳科技接受机构调研时称，目前，在产品研发方向上，公司将持续提升底层人工智能和大数据技术能力，一方面，不断加大数据样本的采集，扩大数据规模、丰富数据维度、细化数据颗粒度，另一方面不断挖掘数据价值，持续推出新的数据产品。尤其在AI领域的研发上，公司将持续推进AI视觉分析、AI语音识别及NLP分析等相关技术的研发工作，以及其在商业零售与政务等领域的场景化应用。
20230116	【唐人神：2023、2024年生猪出栏量规划分别为350、500万头】财联社1月16日电，唐人神接受机构调研时表示，公司2023、2024年生猪出栏量规划分别为350、500万头。在出栏结构方面，公司还是以肥猪出栏为主。猪价从10月份的28元每公斤下降到目前的14元每公斤左右的水平，跌幅确实较大，很大一部分原因是供需错配，主要体现在：一是前期压栏和二次育肥导致供给延后到春节前，加大短期供给；二是春节前消费旺季不及预期，需求不足。	21:06_x000D_ 【唐人神：2023、2024年生猪出栏量规划分别为350、500万头】财联社1月16日电，唐人神接受机构调研时表示，公司2023、2024年生猪出栏量规划分别为350、500万头。在出栏结构方面，公司还是以肥猪出栏为主。猪价从10月份的28元每公斤下降到目前的14元每公斤左右的水平，跌幅确实较大，很大一部分原因是供需错配，主要体现在：一是前期压栏和二次育肥导致供给延后到春节前，加大短期供给；二是春节前消费旺季不及预期，需求不足。
20230831	14:20 _x000D_ [[+_+]]_x000D_ 专享 专享_x000D_ 【盘中宝】“一揽子化债方案”预期加强，机构力挺这一行业PB将得到修复，板块估值尚处历史底部区域，这家公司拥有完整的产业链，已取得多项技术突破 解锁直达>>	14:20 _x000D_ [[+_+]]_x000D_ 专享 专享_x000D_ 【盘中宝】“一揽子化债方案”预期加强，机构力挺这一行业PB将得到修复，板块估值尚处历史底部区域，这家公司拥有完整的产业链，已取得多项技术突破 解锁直达>>
20230906	【北向资金今日净买入0.41亿元 中兴通讯获净买入3.18亿元】财联社9月6日电，北向资金今日净买入0.41亿元。中兴通讯、宁德时代、药明康德分别获净买入3.18亿元、2.28亿元、2.2亿元。隆基绿能净卖出额居首，金额为4.52亿元。	17:31:08_x000D_ 【北向资金今日净买入0.41亿元 中兴通讯获净买入3.18亿元】财联社9月6日电，北向资金今日净买入0.41亿元。中兴通讯、宁德时代、药明康德分别获净买入3.18亿元、2.28亿元、2.2亿元。隆基绿能净卖出额居首，金额为4.52亿元。
20230109	【岭南股份：恒润集团成为全国文化大数据交易中心场内交易主体】财联社1月9日电，岭南股份公告，公司控股子公司上海恒润数字科技集团股份有限公司近期与深圳文化产权交易所有限公司签订了《临时交易主体进场协议》，恒润集团获得深圳文交所独家承建的全国文化大数据交易中心场内交易主体综合席位（二合一，授权方/卖方、文化数据经纪商），恒润集团将以专业的数据交易服务商、职业的数据交易授权方/卖方的身份进场，从事文化大数据的确权与交易业务，并取得相应收益。	15:50_x000D_ 【岭南股份：恒润集团成为全国文化大数据交易中心场内交易主体】财联社1月9日电，岭南股份公告，公司控股子公司上海恒润数字科技集团股份有限公司近期与深圳文化产权交易所有限公司签订了《临时交易主体进场协议》，恒润集团获得深圳文交所独家承建的全国文化大数据交易中心场内交易主体综合席位（二合一，授权方/卖方、文化数据经纪商），恒润集团将以专业的数据交易服务商、职业的数据交易授权方/卖方的身份进场，从事文化大数据的确权与交易业务，并取得相应收益。
20230529	【世龙实业：因涉嫌信披违法违规 证监会对公司立案】财联社5月29日电，世龙实业公告，因公司涉嫌信息披露违法违规，证监会决定对公司立案。	18:48:44_x000D_ 【世龙实业：因涉嫌信披违法违规 证监会对公司立案】财联社5月29日电，世龙实业公告，因公司涉嫌信息披露违法违规，证监会决定对公司立案。
20230601	【康泰生物回应2023年公司管理层继续涨薪100%传言：情况不属实】财联社6月1日电，有投资者在互动平台向康泰生物提问，市场传言公司管理层在2022年大幅涨薪40%左右后，2023年公司管理层继续涨薪100%，公司计划在2025年管理层年薪将合计达到1亿到1.5亿之间，请问是否属实？康泰生物回复称，上述情况不属实。	11:25:55_x000D_ 【康泰生物回应2023年公司管理层继续涨薪100%传言：情况不属实】财联社6月1日电，有投资者在互动平台向康泰生物提问，市场传言公司管理层在2022年大幅涨薪40%左右后，2023年公司管理层继续涨薪100%，公司计划在2025年管理层年薪将合计达到1亿到1.5亿之间，请问是否属实？康泰生物回复称，上述情况不属实。
20230421	【国有企业创建世界一流示范企业扩围 17家入选】财联社4月21日电，国务院国资委在中国石油大厦召开国有企业创建世界一流示范企业推进会。国资委在现有11家示范企业基础上，巩固深化示范创建工作，决定将中国电科、中国石化、中国海油、中国华能、中国一汽、中国远洋海运、中粮集团、招商局集团、华润集团、中国建材等10家中央企业和上海汽车、安徽海螺、深圳投控、潍柴控股、京东方、万华化学、宁波舟山港等7家地方国有企业纳入创建世界一流示范企业范围。	18:47:50_x000D_ 【国有企业创建世界一流示范企业扩围 17家入选】财联社4月21日电，国务院国资委在中国石油大厦召开国有企业创建世界一流示范企业推进会。国资委在现有11家示范企业基础上，巩固深化示范创建工作，决定将中国电科、中国石化、中国海油、中国华能、中国一汽、中国远洋海运、中粮集团、招商局集团、华润集团、中国建材等10家中央企业和上海汽车、安徽海螺、深圳投控、潍柴控股、京东方、万华化学、宁波舟山港等7家地方国有企业纳入创建世界一流示范企业范围。
20230427	【阿根廷将使用人民币结算中国进口商品】财联社4月27日电，阿根廷经济部长马萨当地时间4月26日召开新闻发布会，宣布阿根廷将停止使用美元来支付从中国进口的商品，转而使用人民币结算。马萨表示，与不同企业达成协议后，阿根廷将于本月使用人民币支付价值相当于大约10.4亿美元的中国进口商品。使用人民币可以加快阿根廷未来几个月的中国商品进口节奏，相关授权的效率将更高。预计从5月份起，阿根廷还将使用人民币支付价值相当于7.9亿至10亿美元的中国进口商品。	07:17:23_x000D_ 【阿根廷将使用人民币结算中国进口商品】财联社4月27日电，阿根廷经济部长马萨当地时间4月26日召开新闻发布会，宣布阿根廷将停止使用美元来支付从中国进口的商品，转而使用人民币结算。马萨表示，与不同企业达成协议后，阿根廷将于本月使用人民币支付价值相当于大约10.4亿美元的中国进口商品。使用人民币可以加快阿根廷未来几个月的中国商品进口节奏，相关授权的效率将更高。预计从5月份起，阿根廷还将使用人民币支付价值相当于7.9亿至10亿美元的中国进口商品。
20230210	【海天瑞声兔年涨幅达200%】财联社2月10日电，海天瑞声继续走高，盘中涨超10%，兔年10个交易日累计涨幅达200%。	09:50_x000D_ 【海天瑞声兔年涨幅达200%】财联社2月10日电，海天瑞声继续走高，盘中涨超10%，兔年10个交易日累计涨幅达200%。
20230203	【亿联网络：目前公司技术暂不涉及美对华封锁领域】财联社2月3日电，亿联网络在互动平台表示，目前公司技术暂不涉及美对华封锁领域，同时公司芯片采取国产化并行的方案，以及公司智能制造产业园的建设使得公司供应链风险较低。公司生产经营稳健，减持属于员工持股平台而非自然人大股东的减持。	14:33_x000D_ 【亿联网络：目前公司技术暂不涉及美对华封锁领域】财联社2月3日电，亿联网络在互动平台表示，目前公司技术暂不涉及美对华封锁领域，同时公司芯片采取国产化并行的方案，以及公司智能制造产业园的建设使得公司供应链风险较低。公司生产经营稳健，减持属于员工持股平台而非自然人大股东的减持。
20230209	【德宏股份：子公司签订不低于6亿元储能产品销售框架协议】财联社2月9日电，德宏股份公告，公司近日与兰钧新能源签订了采购框架协议。根据协议，公司承诺在产品测试合格后，自2023年3月1日起至2023年12月31日期间，拟向兰钧新能源采购不低于500MWh的磷酸铁锂电芯。另外，子公司镇能科技近日与浙江全维度能源科技有限公司签订了销售框架协议。根据协议，自2023年2月1日起（含当日）至2024年2月1日（含当日）止，全维度拟向镇能科技采购储能产品金额总计不低于6亿元。	19:08_x000D_ 【德宏股份：子公司签订不低于6亿元储能产品销售框架协议】财联社2月9日电，德宏股份公告，公司近日与兰钧新能源签订了采购框架协议。根据协议，公司承诺在产品测试合格后，自2023年3月1日起至2023年12月31日期间，拟向兰钧新能源采购不低于500MWh的磷酸铁锂电芯。另外，子公司镇能科技近日与浙江全维度能源科技有限公司签订了销售框架协议。根据协议，自2023年2月1日起（含当日）至2024年2月1日（含当日）止，全维度拟向镇能科技采购储能产品金额总计不低于6亿元。
20230804	【广和通：2023年上半年净利润同比增长48.53%】财联社8月4日电，广和通发布半年度报告，公司实现营业收入38.65亿元，比去年同期增长59.87%，实现归属于母公司所有者的净利润3.03亿元，同比增长48.53%。	18:34:19_x000D_ 【广和通：2023年上半年净利润同比增长48.53%】财联社8月4日电，广和通发布半年度报告，公司实现营业收入38.65亿元，比去年同期增长59.87%，实现归属于母公司所有者的净利润3.03亿元，同比增长48.53%。
20230814	【陕西煤业：杨照乾辞去董事长职务】财联社8月14日电，陕西煤业公告，杨照乾因年届退休申请辞去公司第三届董事会董事、董事长及董事会专门委员会相关职务。辞去职务后，杨照乾不在公司担任任何职务。	16:13:13_x000D_ 【陕西煤业：杨照乾辞去董事长职务】财联社8月14日电，陕西煤业公告，杨照乾因年届退休申请辞去公司第三届董事会董事、董事长及董事会专门委员会相关职务。辞去职务后，杨照乾不在公司担任任何职务。
20230814	08:20 _x000D_ [[+_+]]_x000D_ 专享 专享_x000D_ 【点金互动易】医药+SPD，这家公司大部分终端客户为公立医院，在SPD领域经验丰富；这家公司盐酸氟西汀胶囊通过一致性评价并中标集采 解锁直达>>	08:20 _x000D_ [[+_+]]_x000D_ 专享 专享_x000D_ 【点金互动易】医药+SPD，这家公司大部分终端客户为公立医院，在SPD领域经验丰富；这家公司盐酸氟西汀胶囊通过一致性评价并中标集采 解锁直达>>
20230817	【森鹰窗业：上半年净利同比增79.83%】财联社8月17日电，森鹰窗业披露半年报，上半年实现营业收入3.36亿元，同比增长7.11%；净利润4313.37万元，同比增长79.83%；基本每股收益0.45元。	21:13:15_x000D_ 【森鹰窗业：上半年净利同比增79.83%】财联社8月17日电，森鹰窗业披露半年报，上半年实现营业收入3.36亿元，同比增长7.11%；净利润4313.37万元，同比增长79.83%；基本每股收益0.45元。
20230216	【首都在线：已为国内多家涉及人工智能类客户提供服务】财联社2月16日电，首都在线在互动平台表示，公司针对GPU服务器的特殊性，自主开发了自研管理芯片及配套的管理系统，完善了边缘云节点的实施效率及运营能力，搭建了面向ChatGPT行业的泛渲染异构算力公有云平台，新一代算力平台可为ChatGPT类人工智能应用提供算力、算法、云渲染等技术服务，已为国内多家涉及人工智能类客户提供服务。	13:26_x000D_ 【首都在线：已为国内多家涉及人工智能类客户提供服务】财联社2月16日电，首都在线在互动平台表示，公司针对GPU服务器的特殊性，自主开发了自研管理芯片及配套的管理系统，完善了边缘云节点的实施效率及运营能力，搭建了面向ChatGPT行业的泛渲染异构算力公有云平台，新一代算力平台可为ChatGPT类人工智能应用提供算力、算法、云渲染等技术服务，已为国内多家涉及人工智能类客户提供服务。
20230630	【比亚迪汽车：巴西总统卢拉会见比亚迪集团执行副总裁李柯】财联社6月30日电，据比亚迪汽车微博30日消息，巴西总统卢拉会见比亚迪集团执行副总裁李柯。	08:54:25_x000D_ 【比亚迪汽车：巴西总统卢拉会见比亚迪集团执行副总裁李柯】财联社6月30日电，据比亚迪汽车微博30日消息，巴西总统卢拉会见比亚迪集团执行副总裁李柯。
20230721	【常州市部分银行同意下调存量房贷利率】财联社7月21日电，据“常州日报”微信公众号消息，记者采访常州市部分银行后发现，目前，常州市商业银行还没出台统一的指导文件和具体细则，但是，已经有一些贷款人与贷款银行就存量房贷利率进行了沟通，也有银行同意下调存量房贷利率。	08:21:48_x000D_ 【常州市部分银行同意下调存量房贷利率】财联社7月21日电，据“常州日报”微信公众号消息，记者采访常州市部分银行后发现，目前，常州市商业银行还没出台统一的指导文件和具体细则，但是，已经有一些贷款人与贷款银行就存量房贷利率进行了沟通，也有银行同意下调存量房贷利率。
20230425	【华特气体：董事长拟减持不超过1%】财联社4月25日电，华特气体公告，董事长石平湘拟减持不超过1%。	17:43:55_x000D_ 【华特气体：董事长拟减持不超过1%】财联社4月25日电，华特气体公告，董事长石平湘拟减持不超过1%。
20230428	【加加食品：一季度净利1288.23万元 同比增1239.54%】财联社4月28日电，加加食品披露一季报，一季度实现营业收入4.35亿元，同比下降15.61%；净利润1288.23万元，同比增长1239.54%；基本每股收益0.01元。业绩增长主要系产品品种结构调整，高毛利产品销量增加以及一线业务人员优化。	16:30:51_x000D_ 【加加食品：一季度净利1288.23万元 同比增1239.54%】财联社4月28日电，加加食品披露一季报，一季度实现营业收入4.35亿元，同比下降15.61%；净利润1288.23万元，同比增长1239.54%；基本每股收益0.01元。业绩增长主要系产品品种结构调整，高毛利产品销量增加以及一线业务人员优化。
20230217	【主力资金监控：东方财富净卖出超2亿元】财联社2月17日电，财联社星矿数据显示，今日早盘主力资金净流入食品饮料、煤炭、医药生物等板块，净流出大金融、证券、电器机械等板块，其中净流出大金融板块超21亿元。个股方面，拓维信息一度涨停，主力资金净买入3.06亿元，五粮液、同方股份、凯撒文化获主力资金净流入居前；东方财富遭净卖出超2亿元，宁夏建材、中兴通讯、中国软件主力资金净流出额居前。	10:54_x000D_ 【主力资金监控：东方财富净卖出超2亿元】财联社2月17日电，财联社星矿数据显示，今日早盘主力资金净流入食品饮料、煤炭、医药生物等板块，净流出大金融、证券、电器机械等板块，其中净流出大金融板块超21亿元。个股方面，拓维信息一度涨停，主力资金净买入3.06亿元，五粮液、同方股份、凯撒文化获主力资金净流入居前；东方财富遭净卖出超2亿元，宁夏建材、中兴通讯、中国软件主力资金净流出额居前。
20230824	【宁德时代重卡换电宁厦线正式通车】财联社8月24日电，由宁德时代旗下子公司时代骐骥与福建省高速集团共同建设的全国首条高速公路重卡换电绿色物流专线——“宁德厦门干线”(下称宁厦线)在福建省高速集团长乐服务区举办了正式通车仪式。宁厦线位于沈海高速福州绕城高速段，全程约420公里，共配备4座换电站，将为往返宁德、厦门之间的电动重卡提供及时补能服务。	17:40:15_x000D_ 【宁德时代重卡换电宁厦线正式通车】财联社8月24日电，由宁德时代旗下子公司时代骐骥与福建省高速集团共同建设的全国首条高速公路重卡换电绿色物流专线——“宁德厦门干线”(下称宁厦线)在福建省高速集团长乐服务区举办了正式通车仪式。宁厦线位于沈海高速福州绕城高速段，全程约420公里，共配备4座换电站，将为往返宁德、厦门之间的电动重卡提供及时补能服务。
20230713	【万里马：代理销售与特斯拉合作推出的Model S儿童电动车】财联社7月13日电，万里马在互动平台表示，Radio Flyer是公司控股子公司广州超琦信息科技有限公司在中国大陆地区代理运营的品牌，运营渠道包括天猫旗舰店和京东旗舰店。目前代理销售的产品包括Radio Flyer与特斯拉合作推出的Model S儿童电动车。特斯拉即将发售的儿童越野摩托车Cyberquad目前并未授权公司（含子公司）销售。	18:20:10_x000D_ 【万里马：代理销售与特斯拉合作推出的Model S儿童电动车】财联社7月13日电，万里马在互动平台表示，Radio Flyer是公司控股子公司广州超琦信息科技有限公司在中国大陆地区代理运营的品牌，运营渠道包括天猫旗舰店和京东旗舰店。目前代理销售的产品包括Radio Flyer与特斯拉合作推出的Model S儿童电动车。特斯拉即将发售的儿童越野摩托车Cyberquad目前并未授权公司（含子公司）销售。
20230206	【亚康股份：公司财报中没有AIGC业务的相关收入】财联社2月6日电，亚康股份在互动平台表示，公司财报中没有AIGC业务的相关收入。关于AIGC领域，公司目前仅仅是有个别研发人员储备这方面技术，公司在AIGC领域，形成完整的技术能力与服务能力，进而获得订单、产生收入，还需要做很多工作，需要相当长的时间，并且有很大的不确定性。请广大投资者注意投资风险，理性投资。	09:02_x000D_ 【亚康股份：公司财报中没有AIGC业务的相关收入】财联社2月6日电，亚康股份在互动平台表示，公司财报中没有AIGC业务的相关收入。关于AIGC领域，公司目前仅仅是有个别研发人员储备这方面技术，公司在AIGC领域，形成完整的技术能力与服务能力，进而获得订单、产生收入，还需要做很多工作，需要相当长的时间，并且有很大的不确定性。请广大投资者注意投资风险，理性投资。
20230511	【电商板块震荡走强 值得买大涨超10%】财联社5月11日电，电商板块震荡走强，值得买、三六五网涨超10%，跨境通、青木股份大涨超7%，壹网壹创、返利科技、凯淳股份、若羽臣等涨幅靠前。财通证券指出，一季报为跨境电商业绩修复的阶段性验证，海外刚需韧性+库存出清的行业整体景气度持续，叠加AIGC技术的增效作用，持续看好跨境电商+AI。	14:29:35_x000D_ 【电商板块震荡走强 值得买大涨超10%】财联社5月11日电，电商板块震荡走强，值得买、三六五网涨超10%，跨境通、青木股份大涨超7%，壹网壹创、返利科技、凯淳股份、若羽臣等涨幅靠前。财通证券指出，一季报为跨境电商业绩修复的阶段性验证，海外刚需韧性+库存出清的行业整体景气度持续，叠加AIGC技术的增效作用，持续看好跨境电商+AI。
20230226	16:17 _x000D_ [[+_+]]_x000D_ 专享 专享_x000D_ 【风口研报·困境翻转】PE仅14倍的独家生物药公司、重磅品种正在放量，近2年资产减值充分释放风险、今年业绩大幅反转 解锁直达>>	16:17 _x000D_ [[+_+]]_x000D_ 专享 专享_x000D_ 【风口研报·困境翻转】PE仅14倍的独家生物药公司、重磅品种正在放量，近2年资产减值充分释放风险、今年业绩大幅反转 解锁直达>>
20230130	【智度股份：拟1.5亿元-3亿元回购股份】财联社1月30日电，智度股份公告，公司拟以1.5亿元-3亿元回购股份，用于员工持股计划或股权激励。回购价格不超过6.5元/股。	20:00_x000D_ 【智度股份：拟1.5亿元-3亿元回购股份】财联社1月30日电，智度股份公告，公司拟以1.5亿元-3亿元回购股份，用于员工持股计划或股权激励。回购价格不超过6.5元/股。
20230608	【比亚迪王传福：公司持续布局产能 目前已基本解决供需平衡问题】财联社6月8日电，比亚迪今日召开2022年年度股东大会。比亚迪董事长王传福在会上表示，比亚迪从去年开始大力扩展各个地区产能，目前已基本解决供需平衡问题。目前公司产能，还有各个零部件产出，可以满足未来市场需求。同时，公司已做好充分的准备，满足未来海外市场不断增长的需求。 (中证报)	10:55:04_x000D_ 【比亚迪王传福：公司持续布局产能 目前已基本解决供需平衡问题】财联社6月8日电，比亚迪今日召开2022年年度股东大会。比亚迪董事长王传福在会上表示，比亚迪从去年开始大力扩展各个地区产能，目前已基本解决供需平衡问题。目前公司产能，还有各个零部件产出，可以满足未来市场需求。同时，公司已做好充分的准备，满足未来海外市场不断增长的需求。 (中证报)
20230602	08:12 _x000D_ [[+_+]]_x000D_ 专享 专享_x000D_ 【点金互动易】AR/VR+人工智能+机器视觉，已储备AR/VR相关硬件产品的核心技术，这家企业子公司在人工智能领域研发多年，掌握了自主行走算法等核心技术 解	08:12 _x000D_ [[+_+]]_x000D_ 专享 专享_x000D_ 【点金互动易】AR/VR+人工智能+机器视觉，已储备AR/VR相关硬件产品的核心技术，这家企业子公司在人工智能领域研发多年，掌握了自主行走算法等核心技术 解锁直达>>
20230615	【宗申动力：公司的高端零部件新工厂项目预计今年完成竣工并投入使用】财联社6月15日电，宗申动力在互动平台表示，公司的高端零部件新工厂项目预计今年完成竣工并投入使用。	11:23:43_x000D_ 【宗申动力：公司的高端零部件新工厂项目预计今年完成竣工并投入使用】财联社6月15日电，宗申动力在互动平台表示，公司的高端零部件新工厂项目预计今年完成竣工并投入使用。
20230304	【派能科技：获TÜV莱茵全球首张钠离子电池认证证书】财联社3月4日电，派能科技消息，3月3日，派能科技收到德国莱茵TÜV集团(下称TÜV莱茵)颁发的关于钠离子电池认证证书，该证书为TÜV莱茵颁发的全球首张钠离子电池认证证书。据悉，该认证标准是关于储能、动力电池的国际权威认证，该认证证书的获得也标志着派能科技钠离子电池技术已经成熟，率先具备应用于户用储能、工商业储能、电站储能等领域出口资质。	13:15_x000D_ 【派能科技：获TÜV莱茵全球首张钠离子电池认证证书】财联社3月4日电，派能科技消息，3月3日，派能科技收到德国莱茵TÜV集团(下称TÜV莱茵)颁发的关于钠离子电池认证证书，该证书为TÜV莱茵颁发的全球首张钠离子电池认证证书。据悉，该认证标准是关于储能、动力电池的国际权威认证，该认证证书的获得也标志着派能科技钠离子电池技术已经成熟，率先具备应用于户用储能、工商业储能、电站储能等领域出口资质。
20230110	08:57 _x000D_ [[+_+]]_x000D_ 专享 专享_x000D_ 【电报解读】储能已完成招标44GWh，“光伏需求超预期+政策频出”利好储能发展，这家企业中标南方电网项目 解锁直达>>	08:57 _x000D_ [[+_+]]_x000D_ 专享 专享_x000D_ 【电报解读】储能已完成招标44GWh，“光伏需求超预期+政策频出”利好储能发展，这家企业中标南方电网项目 解锁直达>>
20230310	【美国2月非农就业人数增加31.1万 高于预期】财联社3月10日电，美国2月非农就业人数增加31.1万，预估为增加22.5万，前值为增加51.7万。美国2月平均时薪同比增长4.6％，预估增长4.7％。	21:30_x000D_ 【美国2月非农就业人数增加31.1万 高于预期】财联社3月10日电，美国2月非农就业人数增加31.1万，预估为增加22.5万，前值为增加51.7万。美国2月平均时薪同比增长4.6％，预估增长4.7％。
20230217	【罗牛山：正在论证筹划向特定对象发行A股股票事项】财联社2月17日电，罗牛山公告，正在论证筹划向特定对象发行A股股票事项，本次发行所募集资金拟用于生猪养殖等政策支持、符合上市公司再融资政策要求的主营业务。	19:20_x000D_ 【罗牛山：正在论证筹划向特定对象发行A股股票事项】财联社2月17日电，罗牛山公告，正在论证筹划向特定对象发行A股股票事项，本次发行所募集资金拟用于生猪养殖等政策支持、符合上市公司再融资政策要求的主营业务。
20230228	【上海谊众：2022年净利润1.43亿元】《科创板日报》28日讯，上海谊众公告，2022年净利润1.43亿元，上年同期亏损399.7万元，拟10转1派3元。	18:49_x000D_ 【上海谊众：2022年净利润1.43亿元】《科创板日报》28日讯，上海谊众公告，2022年净利润1.43亿元，上年同期亏损399.7万元，拟10转1派3元。
20230407	【久日新材：子公司已完成多款i-线半导体光刻胶配方研发 正进行重点客户送样验证工作和中试生产线建设】财联社4月7日电，久日新材接受机构调研时称，公司子公司久日半导体已完成多款i-线半导体光刻胶配方的研发，现正在进行重点客户的送样验证工作和中试生产线建设。同时，久日半导体已掌握显示面板光刻胶的生产技术，正积极推进面板和半导体光刻胶生产基地的规划与建设，以尽快实现规模化生产。	10:17:44_x000D_ 【久日新材：子公司已完成多款i-线半导体光刻胶配方研发 正进行重点客户送样验证工作和中试生产线建设】财联社4月7日电，久日新材接受机构调研时称，公司子公司久日半导体已完成多款i-线半导体光刻胶配方的研发，现正在进行重点客户的送样验证工作和中试生产线建设。同时，久日半导体已掌握显示面板光刻胶的生产技术，正积极推进面板和半导体光刻胶生产基地的规划与建设，以尽快实现规模化生产。
20230310	【力星股份：向特定对象发行股票注册批复到期失效】财联社3月10日电，力星股份公告，公司2022年3月收到证监会出具的关于同意公司向特定对象发行股票注册的批复。取得批复文件后，公司会同中介机构积极推进此次发行股票工作，但由于资本市场环境和融资时机等多方面因素变化，公司未能在批复文件有效期内完成发行事宜，该批复到期自动失效。	15:50_x000D_ 【力星股份：向特定对象发行股票注册批复到期失效】财联社3月10日电，力星股份公告，公司2022年3月收到证监会出具的关于同意公司向特定对象发行股票注册的批复。取得批复文件后，公司会同中介机构积极推进此次发行股票工作，但由于资本市场环境和融资时机等多方面因素变化，公司未能在批复文件有效期内完成发行事宜，该批复到期自动失效。
20230213	【恩捷股份：控股子公司与宁德时代签订2023年度《保供协议》】财联社2月13日电，恩捷股份公告，控股子公司上海恩捷与宁德时代签订2023年度《保供协议》，鉴于双方的友好合作关系及宁德时代对锂电池湿法隔膜的增量需求，结合宁德时代后续需求和上海恩捷产能和扩产能力，上海恩捷向宁德时代集团（包含宁德时代及其关联公司）供应协议约定数量的锂电池湿法隔膜，具体以签发的订单为准。	18:34_x000D_ 【恩捷股份：控股子公司与宁德时代签订2023年度《保供协议》】财联社2月13日电，恩捷股份公告，控股子公司上海恩捷与宁德时代签订2023年度《保供协议》，鉴于双方的友好合作关系及宁德时代对锂电池湿法隔膜的增量需求，结合宁德时代后续需求和上海恩捷产能和扩产能力，上海恩捷向宁德时代集团（包含宁德时代及其关联公司）供应协议约定数量的锂电池湿法隔膜，具体以签发的订单为准。
20230222	【复旦复华：公司未参与复旦大学类ChatGPT模型研发工作】财联社2月22日电，复旦复华午间公告，公司注意到复旦大学研发的类ChatGPT模型MOSS引发了大量关注和讨论，为避免相关信息对投资者造成误导，现予以澄清说明。截至目前，公司未参与复旦大学相关研究团队的研发工作，相关事项与公司不存在任何关系。目前，复旦大学与公司不存在股权关系。	12:17_x000D_ 【复旦复华：公司未参与复旦大学类ChatGPT模型研发工作】财联社2月22日电，复旦复华午间公告，公司注意到复旦大学研发的类ChatGPT模型MOSS引发了大量关注和讨论，为避免相关信息对投资者造成误导，现予以澄清说明。截至目前，公司未参与复旦大学相关研究团队的研发工作，相关事项与公司不存在任何关系。目前，复旦大学与公司不存在股权关系。
20230324	【西部矿业：2022年净利润同比增长18% 拟10派14元】财联社3月24日电，西部矿业公告，2022年净利润34.46亿元，同比增长18%，拟10派14元。	19:07_x000D_ 【西部矿业：2022年净利润同比增长18% 拟10派14元】财联社3月24日电，西部矿业公告，2022年净利润34.46亿元，同比增长18%，拟10派14元。
20230406	23:11 _x000D_ [[+_+]]_x000D_ 专享 专享_x000D_ 【电报解读】高端装备+军工！电磁能细分产品国内市占率100%，特种发射系统进入批量订货阶段，这家公司一季度净利预计翻倍 解锁直达>>	23:11 _x000D_ [[+_+]]_x000D_ 专享 专享_x000D_ 【电报解读】高端装备+军工！电磁能细分产品国内市占率100%，特种发射系统进入批量订货阶段，这家公司一季度净利预计翻倍 解锁直达>>
20230202	【沪硅产业：向专业投资者公开发行不超过13.4亿元科技创新公司债券申请获批】《科创板日报》2日讯，沪硅产业公告，公司于近日收到证监会出具的《关于同意上海硅产业集团股份有限公司向专业投资者公开发行科技创新公司债券注册的批复》（证监许可[2023]168号），同意公司向专业投资者公开发行面值总额不超过13.4亿元科技创新公司债券的注册申请，批复自同意注册之日起24个月内有效。	17:22_x000D_ 【沪硅产业：向专业投资者公开发行不超过13.4亿元科技创新公司债券申请获批】《科创板日报》2日讯，沪硅产业公告，公司于近日收到证监会出具的《关于同意上海硅产业集团股份有限公司向专业投资者公开发行科技创新公司债券注册的批复》（证监许可[2023]168号），同意公司向专业投资者公开发行面值总额不超过13.4亿元科技创新公司债券的注册申请，批复自同意注册之日起24个月内有效。
20230814	【独家|龙湖已提前偿还“18龙湖04”17亿元债务 年内到期境内债务仅余1.19亿元】财联社8月14日电，据记者获悉，8月14日龙湖企业拓展已将17亿元款项拨入18龙湖04债券兑付专户，目前龙湖年内境内到期债务仅余11月到期的1.19亿元。据悉，龙湖2024年1月到期的153亿港币银团贷款，目前已提前偿还72亿港币，其计划在年内全部提前偿还。（财联社记者 李洁）	10:35:40_x000D_ 【独家|龙湖已提前偿还“18龙湖04”17亿元债务 年内到期境内债务仅余1.19亿元】财联社8月14日电，据记者获悉，8月14日龙湖企业拓展已将17亿元款项拨入18龙湖04债券兑付专户，目前龙湖年内境内到期债务仅余11月到期的1.19亿元。据悉，龙湖2024年1月到期的153亿港币银团贷款，目前已提前偿还72亿港币，其计划在年内全部提前偿还。（财联社记者 李洁）
20230111	【通业科技：公司与中国中车控制的下属单位签订日常经营销售合同】财联社1月11日电，通业科技公告，公司与中国中车控制的下属单位签订日常经营销售合同，所涉业务主要包括销售电源类、智能控制类、电机风机类及其配附件产品和提供产品检修维保服务。自2022年1月10日至2023年1月10日期间，公司与中国中车控制的下属单位已签订并正式生效的合同金额累计达1.6亿元。	15:48_x000D_ 【通业科技：公司与中国中车控制的下属单位签订日常经营销售合同】财联社1月11日电，通业科技公告，公司与中国中车控制的下属单位签订日常经营销售合同，所涉业务主要包括销售电源类、智能控制类、电机风机类及其配附件产品和提供产品检修维保服务。自2022年1月10日至2023年1月10日期间，公司与中国中车控制的下属单位已签订并正式生效的合同金额累计达1.6亿元。
20230707	【歌尔股份：公司外销业务中包括VR虚拟现实产品相关业务】财联社7月7日电，歌尔股份在互动平台上称，公司的外销业务中包括VR虚拟现实产品相关业务。	09:06:21_x000D_ 【歌尔股份：公司外销业务中包括VR虚拟现实产品相关业务】财联社7月7日电，歌尔股份在互动平台上称，公司的外销业务中包括VR虚拟现实产品相关业务。
20230710	【民和股份：6月商品代鸡苗销售收入同比增长8.24%】财联社7月10日电，民和股份公告，6月销售商品代鸡苗2160.24万只，同比变动-2.66%，环比变动-5.58%；销售收入4537.37万元，同比变动8.24%，环比变动-7.37%。	16:45:35_x000D_ 【民和股份：6月商品代鸡苗销售收入同比增长8.24%】财联社7月10日电，民和股份公告，6月销售商品代鸡苗2160.24万只，同比变动-2.66%，环比变动-5.58%；销售收入4537.37万元，同比变动8.24%，环比变动-7.37%。
20230302	【出于对内容的担忧 苹果阻止了一款应用基于ChatGPT工具的更新】财联社3月2日电，据《华尔街日报》报道，苹果公司阻止了一款电子邮件应用程序基于ChatGPT的更新，原因是担心可能会生成不适合儿童的内容。这款应用程序名为BlueMail，该应用程序试图增加AI功能，使用ChatGPT来帮助自动编写邮件。	21:07_x000D_ 【出于对内容的担忧 苹果阻止了一款应用基于ChatGPT工具的更新】财联社3月2日电，据《华尔街日报》报道，苹果公司阻止了一款电子邮件应用程序基于ChatGPT的更新，原因是担心可能会生成不适合儿童的内容。这款应用程序名为BlueMail，该应用程序试图增加AI功能，使用ChatGPT来帮助自动编写邮件。
20230609	【中材科技：收购中复连众100%股权】财联社6月9日电，中材科技公告，全资子公司中材科技风电叶片股份有限公司拟通过增发股份及支付现金方式收购连云港中复连众复合材料集团有限公司100%股权并进行增资扩股。	20:08:37_x000D_ 【中材科技：收购中复连众100%股权】财联社6月9日电，中材科技公告，全资子公司中材科技风电叶片股份有限公司拟通过增发股份及支付现金方式收购连云港中复连众复合材料集团有限公司100%股权并进行增资扩股。
20230627	【博创科技：股东拟减持不超1%公司股份】财联社6月27日电，博创科技公告，股东东方通信拟减持不超过1%的公司股份。	17:47:10_x000D_ 【博创科技：股东拟减持不超1%公司股份】财联社6月27日电，博创科技公告，股东东方通信拟减持不超过1%的公司股份。
20230402	【卓胜微：拟推193.767万股限制性股票激励计划】财联社4月2日电，卓胜微公布2023年限制性股票激励计划，本激励计划拟授予的限制性股票数量为193.7670万股，约占本激励计划草案公告时公司股本总额53,380.2594万股的0.3630%。本激励计划为一次性授予，无预留权益。本激励计划的激励对象不超过205人，限制性股票的授予价格为61.64元/股。	16:45:00_x000D_ 【卓胜微：拟推193.767万股限制性股票激励计划】财联社4月2日电，卓胜微公布2023年限制性股票激励计划，本激励计划拟授予的限制性股票数量为193.7670万股，约占本激励计划草案公告时公司股本总额53,380.2594万股的0.3630%。本激励计划为一次性授予，无预留权益。本激励计划的激励对象不超过205人，限制性股票的授予价格为61.64元/股。
20230110	【中信证券：上调保险行业评级至“强于大市”】财联社1月10日电，中信证券研报指出，未来一年看，保险行业困境反转逻辑仍然有空间，我们判断合理估值区间为1-1.5倍PB；未来三年看，行业有可能走向健康发展，负债端企稳复苏后可能实现估值切换，至少值1倍PEV；我们上调保险行业评级至“强于大市”。	08:45_x000D_ 【中信证券：上调保险行业评级至“强于大市”】财联社1月10日电，中信证券研报指出，未来一年看，保险行业困境反转逻辑仍然有空间，我们判断合理估值区间为1-1.5倍PB；未来三年看，行业有可能走向健康发展，负债端企稳复苏后可能实现估值切换，至少值1倍PEV；我们上调保险行业评级至“强于大市”。
20230113	【AITO问界汽车降价】财联社1月13日电，AITO问界宣布，针对2023年1月13日8点30分前已提车的车主，将推出新年回馈活动，问界M5EV及问界M7的首任车主将享受总价值3.3-3.5万的权益。此外，自2023年1月13日8点30分开始，AITO问界将带来新年新价格，问界M5EV调整后售价为25.98万元起，问界M7调整后售价为28.98万元起。	08:40_x000D_ 【AITO问界汽车降价】财联社1月13日电，AITO问界宣布，针对2023年1月13日8点30分前已提车的车主，将推出新年回馈活动，问界M5EV及问界M7的首任车主将享受总价值3.3-3.5万的权益。此外，自2023年1月13日8点30分开始，AITO问界将带来新年新价格，问界M5EV调整后售价为25.98万元起，问界M7调整后售价为28.98万元起。
20230111	【安纳达：预计2022年净利润同比增长35%-68%】财联社1月11日电，安纳达公告，预计2022年归母净利润2.5亿元-3.1亿元，同比增长35%-68%。报告期内，公司磷酸铁产品供不应求，铜陵纳源5万吨/年电池级磷酸铁项目实现满负荷生产，本期磷酸铁产量、销量、营业收入和利润同比均大幅度增长。	15:43_x000D_ 【安纳达：预计2022年净利润同比增长35%-68%】财联社1月11日电，安纳达公告，预计2022年归母净利润2.5亿元-3.1亿元，同比增长35%-68%。报告期内，公司磷酸铁产品供不应求，铜陵纳源5万吨/年电池级磷酸铁项目实现满负荷生产，本期磷酸铁产量、销量、营业收入和利润同比均大幅度增长。
20230428	【京沪高铁：一季度净利同比增912.6%】财联社4月28日电，京沪高铁公告，一季度实现营业收入89.39亿元，同比增长57.39%；净利润22.26亿元，同比增长912.6%；基本每股收益0.05元。同日公告，2022年实现营业收入193.36亿元，同比下降34.02%；净利润亏损5.76亿元，去年同期净利48.16亿元；拟每10股派发红利0.114元（含税）。	18:50:07_x000D_ 【京沪高铁：一季度净利同比增912.6%】财联社4月28日电，京沪高铁公告，一季度实现营业收入89.39亿元，同比增长57.39%；净利润22.26亿元，同比增长912.6%；基本每股收益0.05元。同日公告，2022年实现营业收入193.36亿元，同比下降34.02%；净利润亏损5.76亿元，去年同期净利48.16亿元；拟每10股派发红利0.114元（含税）。
20230322	【新疆天业：拟参与投建十户滩工业园区200MW源网荷储一体化项目】财联社3月22日电，新疆天业公告，公司与国电投（深圳）能源发展有限公司共同投资设立合资公司，名称暂定为新疆兵业电投能源发展有限公司，公司名称以公司登记机关核定为准，合资公司投资、建设和经营管理十户滩工业园区200MW源网荷储一体化项目。	17:52_x000D_ 【新疆天业：拟参与投建十户滩工业园区200MW源网荷储一体化项目】财联社3月22日电，新疆天业公告，公司与国电投（深圳）能源发展有限公司共同投资设立合资公司，名称暂定为新疆兵业电投能源发展有限公司，公司名称以公司登记机关核定为准，合资公司投资、建设和经营管理十户滩工业园区200MW源网荷储一体化项目。
20230313	【威孚高科：公司4D毫米波雷达产品已获取干线物流定点项目】财联社3月13日电，威孚高科在互动平台表示，公司4D毫米波雷达产品目前处于市场应用快速发展阶段，已获取干线物流定点项目。公司PEM电解水制氢示范线已搭建完成，正积极推进研发基础能力建设、寻求投资合作机会。	18:53_x000D_ 【威孚高科：公司4D毫米波雷达产品已获取干线物流定点项目】财联社3月13日电，威孚高科在互动平台表示，公司4D毫米波雷达产品目前处于市场应用快速发展阶段，已获取干线物流定点项目。公司PEM电解水制氢示范线已搭建完成，正积极推进研发基础能力建设、寻求投资合作机会。
20230907	【华宝新能：便携太阳能产品均使用BC类电池】财联社9月7日电，华宝新能在互动平台表示，公司便携太阳能产品均使用BC类电池，目前采用全球最先进的IBC电池技术，拥有行业领先的高达25%的转换效率。公司将对相关新技术保持密切关注，并积极布局产业链上下游。	18:04:48_x000D_ 【华宝新能：便携太阳能产品均使用BC类电池】财联社9月7日电，华宝新能在互动平台表示，公司便携太阳能产品均使用BC类电池，目前采用全球最先进的IBC电池技术，拥有行业领先的高达25%的转换效率。公司将对相关新技术保持密切关注，并积极布局产业链上下游。
20230119	【永安林业：2022年度净利预增330%-440%】财联社1月19日电，永安林业公布2022年度业绩预告，报告期归属于上市公司股东的净利润盈利2.35亿元–2.95亿元，比上年同期增长330.2%-440.04%。小财注：Q3净利1185万元，据此计算，Q4净利预计亏损3380万元-亏损9380万元。	17:32_x000D_ 【永安林业：2022年度净利预增330%-440%】财联社1月19日电，永安林业公布2022年度业绩预告，报告期归属于上市公司股东的净利润盈利2.35亿元–2.95亿元，比上年同期增长330.2%-440.04%。小财注：Q3净利1185万元，据此计算，Q4净利预计亏损3380万元-亏损9380万元。
20230128	【拜登宣布杰弗里·齐恩茨将任白宫办公厅主任】财联社1月27日电，根据白宫当地时间1月27日发布的一项声明，美国总统拜登正式宣布罗恩·克莱因将辞去白宫办公厅主任一职，白宫前新冠疫情应对协调员杰弗里·齐恩茨（Jeffrey Zients）将接替罗恩·克莱因成为下一任白宫办公厅主任。	23:08_x000D_ 【拜登宣布杰弗里·齐恩茨将任白宫办公厅主任】财联社1月27日电，根据白宫当地时间1月27日发布的一项声明，美国总统拜登正式宣布罗恩·克莱因将辞去白宫办公厅主任一职，白宫前新冠疫情应对协调员杰弗里·齐恩茨（Jeffrey Zients）将接替罗恩·克莱因成为下一任白宫办公厅主任。
20230411	【蓝色光标：今日已获得微软云官方AI调用和训练许可】财联社4月11日电，蓝色光标在互动平台表示，今日已获得微软云官方AI调用和训练许可，目前微软云上线的是OpenAI ChatGPT（GPT-3.5）的相关服务。微软云尚未提供GPT-4服务，当微软部署完成GPT-4的相关服务后，蓝色光标即可同步使用。	14:26:24_x000D_ 【蓝色光标：今日已获得微软云官方AI调用和训练许可】财联社4月11日电，蓝色光标在互动平台表示，今日已获得微软云官方AI调用和训练许可，目前微软云上线的是OpenAI ChatGPT（GPT-3.5）的相关服务。微软云尚未提供GPT-4服务，当微软部署完成GPT-4的相关服务后，蓝色光标即可同步使用。
20230908	【上交所：港交所因黑色暴雨暂停交易 沪港通下港股通今日暂停交易】财联社9月8日电，上交所公告，9月8日，香港联合证券交易所因黑色暴雨暂停交易。根据《上海证券交易所沪港通业务实施办法》，沪港通下港股通暂停交易。港股通交易的清算交收事宜，根据中国证券登记结算有限责任公司的安排进行。	08:43:01_x000D_ 【上交所：港交所因黑色暴雨暂停交易 沪港通下港股通今日暂停交易】财联社9月8日电，上交所公告，9月8日，香港联合证券交易所因黑色暴雨暂停交易。根据《上海证券交易所沪港通业务实施办法》，沪港通下港股通暂停交易。港股通交易的清算交收事宜，根据中国证券登记结算有限责任公司的安排进行。
20230827	17:17 _x000D_ [[+_+]]_x000D_ 专享 专享_x000D_ 【风口研报·公司】旺季推动该化工品单周涨价近30%，更有机构预测未来全球市场将增长超50%，这家公司规划产能是现有的4倍多，几乎垄断未来国内新增市场；另有公	17:17 _x000D_ [[+_+]]_x000D_ 专享 专享_x000D_ 【风口研报·公司】旺季推动该化工品单周涨价近30%，更有机构预测未来全球市场将增长超50%，这家公司规划产能是现有的4倍多，几乎垄断未来国内新增市场；另有公司二季度业绩环比大增，明年仍有翻倍增长预期 解锁直达>>
20230820	15:09 _x000D_ [[+_+]]_x000D_ 专享 专享_x000D_ 【研选】这家公司深入布局算力领域，已向科大讯飞交付第一批服务器进行研测；证监会出台活跃资本市场一揽子政策，券商板块调整即是机会；通常政策底与市场底间隔1-3	15:09 _x000D_ [[+_+]]_x000D_ 专享 专享_x000D_ 【研选】这家公司深入布局算力领域，已向科大讯飞交付第一批服务器进行研测；证监会出台活跃资本市场一揽子政策，券商板块调整即是机会；通常政策底与市场底间隔1-3个月，A股市场底越来越近 解锁直达>>
20230130	【广州发展：全资子公司动态调整非居民管道燃气销售价格】财联社1月30日电，广州发展公告，全资子公司广州燃气集团有限公司动态调整非居民管道燃气销售价格，从2023年1月20日起，广州市非居民管道燃气销售价格最高限价由3.95元/立方米调整为4.60元/立方米，下浮不限，执行期为2023年1月20日至2023年7月19日。	15:45_x000D_ 【广州发展：全资子公司动态调整非居民管道燃气销售价格】财联社1月30日电，广州发展公告，全资子公司广州燃气集团有限公司动态调整非居民管道燃气销售价格，从2023年1月20日起，广州市非居民管道燃气销售价格最高限价由3.95元/立方米调整为4.60元/立方米，下浮不限，执行期为2023年1月20日至2023年7月19日。
20230224	【神马股份：拟出资5000万元设立全资子公司】财联社2月24日电，神马股份公告，拟出资5000万元设立全资平顶山神马尼龙材料中试基地有限公司。	15:40_x000D_ 【神马股份：拟出资5000万元设立全资子公司】财联社2月24日电，神马股份公告，拟出资5000万元设立全资平顶山神马尼龙材料中试基地有限公司。
20230303	【电科数字业绩快报：2022年净利润同比增长31%】财联社3月3日电，电科数字发布业绩快报，2022年净利润5.2亿元，同比增长30.67%。	16:53_x000D_ 【电科数字业绩快报：2022年净利润同比增长31%】财联社3月3日电，电科数字发布业绩快报，2022年净利润5.2亿元，同比增长30.67%。
20230705	【纳芯微：公司隔离类芯片产品已经在工业机器人和服务机器人客户批量发货】财联社7月5日电，纳芯微接受机构调研时表示，公司磁电流传感器产品可用于机器人的电机电流检测，磁角度和磁开关传感器产品也在积极拓展机器人应用；公司隔离类芯片产品已经在工业机器人和服务机器人客户批量发货。	21:19:37_x000D_ 【纳芯微：公司隔离类芯片产品已经在工业机器人和服务机器人客户批量发货】财联社7月5日电，纳芯微接受机构调研时表示，公司磁电流传感器产品可用于机器人的电机电流检测，磁角度和磁开关传感器产品也在积极拓展机器人应用；公司隔离类芯片产品已经在工业机器人和服务机器人客户批量发货。
20230309	17:55 _x000D_ [[+_+]]_x000D_ 专享 专享_x000D_ 【风口研报·公司】冷门赛道次新“小黑马”ROE高达44.8%，海外龙头急于锁定公司2023年及未来5年的出货量；重要指标显示这个半导体细分有望迎来景气反转，	17:55 _x000D_ [[+_+]]_x000D_ 专享 专享_x000D_ 【风口研报·公司】冷门赛道次新“小黑马”ROE高达44.8%，海外龙头急于锁定公司2023年及未来5年的出货量；重要指标显示这个半导体细分有望迎来景气反转，分析师看好该弹性标的率先跑出 解锁直达>>
20230314	【深成指跌逾1% 新能源赛道拖累股指】财联社3月14日电，指数走弱，深成指下挫跌逾1%，沪指跌0.56%，创业板指跌1.16%，汽车热管理、钙钛矿电池、麒麟电池等板块指数跌幅居前，贵金属、有色·锌、猪肉产业等板块指数涨幅居前。	10:17_x000D_ 【深成指跌逾1% 新能源赛道拖累股指】财联社3月14日电，指数走弱，深成指下挫跌逾1%，沪指跌0.56%，创业板指跌1.16%，汽车热管理、钙钛矿电池、麒麟电池等板块指数跌幅居前，贵金属、有色·锌、猪肉产业等板块指数涨幅居前。
20230112	【美国12月CPI同比上涨6.5% 符合预期】财联社1月12日电，美国12月CPI同比上涨6.5%，重回“6时代”，为连续第六个月下降，创2021年10月以来最小增幅，预估为6.5%，前值为7.1%。美国12月CPI环比下降0.1%，为2020年5月以来首次环比下降，预估为下降0.1%，前值为上涨0.1%。	21:30_x000D_ 【美国12月CPI同比上涨6.5% 符合预期】财联社1月12日电，美国12月CPI同比上涨6.5%，重回“6时代”，为连续第六个月下降，创2021年10月以来最小增幅，预估为6.5%，前值为7.1%。美国12月CPI环比下降0.1%，为2020年5月以来首次环比下降，预估为下降0.1%，前值为上涨0.1%。
20230209	07:47 _x000D_ [[+_+]]_x000D_ 专享 专享_x000D_ 【九点特供】百度阿里等巨头ChatGPT最新动态曝光，这家百度AI生态伙伴可为客户提供智能文字/语音问答系统等产品；填补国内空白！新一代采用国产芯片的94G	07:47 _x000D_ [[+_+]]_x000D_ 专享 专享_x000D_ 【九点特供】百度阿里等巨头ChatGPT最新动态曝光，这家百度AI生态伙伴可为客户提供智能文字/语音问答系统等产品；填补国内空白！新一代采用国产芯片的94GHz毫米波雷达发布 解锁直达>>
20230728	10:35 _x000D_ [[+_+]]_x000D_ 专享 专享_x000D_ 【风口研报·公司】“低配置+低预期+低估值”或迎底部反转，这家板材公司下游覆盖造船+电工+汽车+油井等领域年内持续发力，毛利率和净利率都处于行业领先地位 解	10:35 _x000D_ [[+_+]]_x000D_ 专享 专享_x000D_ 【风口研报·公司】“低配置+低预期+低估值”或迎底部反转，这家板材公司下游覆盖造船+电工+汽车+油井等领域年内持续发力，毛利率和净利率都处于行业领先地位 解锁直达>>
20230109	【通达电气：目前不涉及轮边电机相关生产及销售业务】财联社1月9日电，通达电气发布异动公告，公司关注到近期有关于“四轮独立轮边电机”的市场热点，公司主要提供车载智能软、硬件产品及配套服务，目前不涉及轮边电机相关生产及销售业务。	19:26_x000D_ 【通达电气：目前不涉及轮边电机相关生产及销售业务】财联社1月9日电，通达电气发布异动公告，公司关注到近期有关于“四轮独立轮边电机”的市场热点，公司主要提供车载智能软、硬件产品及配套服务，目前不涉及轮边电机相关生产及销售业务。
20230512	【海正药业：子公司获得兽药产品批准文号批件】财联社5月12日电，海正药业公告，子公司海正南通公司、海正动保公司分别收到中华人民共和国农业农村部核准签发的甲氧普烯、阿莫西林克拉维酸钾片兽药产品批准文号批件。	17:13:34_x000D_ 【海正药业：子公司获得兽药产品批准文号批件】财联社5月12日电，海正药业公告，子公司海正南通公司、海正动保公司分别收到中华人民共和国农业农村部核准签发的甲氧普烯、阿莫西林克拉维酸钾片兽药产品批准文号批件。
20230313	【赛升药业：参股公司康乐卫士将在北交所上市】财联社3月13日电，赛升药业晚间公告，参股公司北京康乐卫士生物技术股份有限公司将于3月15日在北京证券交易所上市，证券简称：康乐卫士，证券代码：833575，发行价格为42元/股。	15:53_x000D_ 【赛升药业：参股公司康乐卫士将在北交所上市】财联社3月13日电，赛升药业晚间公告，参股公司北京康乐卫士生物技术股份有限公司将于3月15日在北京证券交易所上市，证券简称：康乐卫士，证券代码：833575，发行价格为42元/股。
20230524	2023.05.23 星期二 22:48 _x000D_ [[+_+]]_x000D_ 专享 专享_x000D_ 【电报解读】龙头公司拟超50亿投建算力中心全球总部，“电力+算力”正成为能源变革核心竞争力，这家企业拥有虚拟电厂等技术储备，助	2023.05.23 星期二 22:48 _x000D_ [[+_+]]_x000D_ 专享 专享_x000D_ 【电报解读】龙头公司拟超50亿投建算力中心全球总部，“电力+算力”正成为能源变革核心竞争力，这家企业拥有虚拟电厂等技术储备，助力“电力+算力”融合 解锁直达>>
20230209	17:20 _x000D_ [[+_+]]_x000D_ 专享 专享_x000D_ 【风口研报·行业】在ChatGPT细分领域比GPU更能算！这个芯片在AI“语音识别+语言处理”具备速度+功耗明显优势、国内市场直指300亿空间，这些公司覆盖	17:20 _x000D_ [[+_+]]_x000D_ 专享 专享_x000D_ 【风口研报·行业】在ChatGPT细分领域比GPU更能算！这个芯片在AI“语音识别+语言处理”具备速度+功耗明显优势、国内市场直指300亿空间，这些公司覆盖多个系列产品 解锁直达>>
20230824	【C波长大涨24% 触发临停】财联社8月24日电，波长光电盘中大涨24%，触发临停。公司主要从事精密光学元件与组件的研发、生产和销售，提供各类光学设备、光学设计以及光学检测的整体解决方案。	13:31:09_x000D_ 【C波长大涨24% 触发临停】财联社8月24日电，波长光电盘中大涨24%，触发临停。公司主要从事精密光学元件与组件的研发、生产和销售，提供各类光学设备、光学设计以及光学检测的整体解决方案。
20230113	【当升科技：拟投建当升科技（攀枝花）新材料产业基地首期项目】财联社1月13日电，当升科技公告，拟投资建设当升科技（攀枝花）新材料产业基地首期项目，首期项目计划建成年产12万吨磷酸（锰）铁锂生产线及配套设施，首期项目总投资26亿元。	19:15_x000D_ 【当升科技：拟投建当升科技（攀枝花）新材料产业基地首期项目】财联社1月13日电，当升科技公告，拟投资建设当升科技（攀枝花）新材料产业基地首期项目，首期项目计划建成年产12万吨磷酸（锰）铁锂生产线及配套设施，首期项目总投资26亿元。
20230113	09:52 _x000D_ [[+_+]]_x000D_ 专享 专享_x000D_ 【风口研报·行业】C919订单突破1200架、未来五年年产能计划到达150架，五大材料有望受益大飞机万亿市场空间爆发，这些公司或成为C919供应商实现放量	09:52 _x000D_ [[+_+]]_x000D_ 专享 专享_x000D_ 【风口研报·行业】C919订单突破1200架、未来五年年产能计划到达150架，五大材料有望受益大飞机万亿市场空间爆发，这些公司或成为C919供应商实现放量 解锁直达>>
20230227	【金陵药业：拟定增募资不超过7.5亿元】财联社2月27日电，金陵药业公告，拟定增募资不超过7.5亿元，用于合肥金陵天颐智慧养老项目、核心原料药及高端医药中间体共性生产平台建设项目、补充流动资金。	17:25_x000D_ 【金陵药业：拟定增募资不超过7.5亿元】财联社2月27日电，金陵药业公告，拟定增募资不超过7.5亿元，用于合肥金陵天颐智慧养老项目、核心原料药及高端医药中间体共性生产平台建设项目、补充流动资金。
20230112	【中国交建：拟非公开发行优先股 募资不超过300亿元】财联社1月12日电，中国交建公告，拟非公开发行优先股，发行总数不超过3.00亿股，募集资金总额不超过300亿元，扣除发行费用后的净额拟全部用于补充流动资金。	17:37_x000D_ 【中国交建：拟非公开发行优先股 募资不超过300亿元】财联社1月12日电，中国交建公告，拟非公开发行优先股，发行总数不超过3.00亿股，募集资金总额不超过300亿元，扣除发行费用后的净额拟全部用于补充流动资金。
20230222	08:17 _x000D_ [[+_+]]_x000D_ 专享 专享_x000D_ 【点金互动易】毫米波雷达+智能驾驶+汽车电子，参股公司已研发77GHz 4D毫米波雷达，ADAS系统装车量产，这家公司已拿下长城、东风、一汽等车厂电子系统项	08:17 _x000D_ [[+_+]]_x000D_ 专享 专享_x000D_ 【点金互动易】毫米波雷达+智能驾驶+汽车电子，参股公司已研发77GHz 4D毫米波雷达，ADAS系统装车量产，这家公司已拿下长城、东风、一汽等车厂电子系统项目 解锁直达>>
20230210	【北向资金今日净卖出33.74亿元 天合光能净卖出额居首】财联社2月10日电，北向资金今日净卖出33.74亿元。天合光能、通威股份、贵州茅台分别获净卖出3.58亿元、3.2亿元、3.09亿元。宁德时代净买入额居首，金额为3.95亿元。	17:30_x000D_ 【北向资金今日净卖出33.74亿元 天合光能净卖出额居首】财联社2月10日电，北向资金今日净卖出33.74亿元。天合光能、通威股份、贵州茅台分别获净卖出3.58亿元、3.2亿元、3.09亿元。宁德时代净买入额居首，金额为3.95亿元。
20230428	【中船科技：一季度净利润1743万元 同比增长271.71%】财联社4月28日电，中船科技公布第一季度报告，营业收入6.7亿元，同比增长42.26%，净利润1743万元，同比增长271.71%，扣非净利润1035万元，同比增长271.51%，基本每股收益0.023元。	18:43:00_x000D_ 【中船科技：一季度净利润1743万元 同比增长271.71%】财联社4月28日电，中船科技公布第一季度报告，营业收入6.7亿元，同比增长42.26%，净利润1743万元，同比增长271.71%，扣非净利润1035万元，同比增长271.51%，基本每股收益0.023元。
20230823	【中核科技：上半年净利润6862.3万元 同比增330.95%】财联社8月23日电，中核科技披露半年报，公司上半年实现营业收入7.93亿元，同比增长42.6%；净利润6862.3万元，同比增长330.95%；基本每股收益0.18元。	22:51:42_x000D_ 【中核科技：上半年净利润6862.3万元 同比增330.95%】财联社8月23日电，中核科技披露半年报，公司上半年实现营业收入7.93亿元，同比增长42.6%；净利润6862.3万元，同比增长330.95%；基本每股收益0.18元。
20230117	【皇庭国际：拟5亿元投建特色先进CLIP工艺功率器件封装项目】财联社1月17日电，皇庭国际公告，公司和意发功率拟在安徽巢湖经济开发区投资建设特色先进CLIP工艺功率器件封装项目，总投资约5亿元。	21:29_x000D_ 【皇庭国际：拟5亿元投建特色先进CLIP工艺功率器件封装项目】财联社1月17日电，皇庭国际公告，公司和意发功率拟在安徽巢湖经济开发区投资建设特色先进CLIP工艺功率器件封装项目，总投资约5亿元。
20230725	【深成指涨逾2% 上涨个股近4400只】财联社7月25日电，指数走强，深成指拉升涨逾2%，沪指涨1.55%，创业板指涨1.57%。证券、房地产产业链、食品消费等方向涨幅居前，两市上涨个股近4400只。	09:40:26_x000D_ 【深成指涨逾2% 上涨个股近4400只】财联社7月25日电，指数走强，深成指拉升涨逾2%，沪指涨1.55%，创业板指涨1.57%。证券、房地产产业链、食品消费等方向涨幅居前，两市上涨个股近4400只。
20230223	【惠泰医疗业绩快报：2022年净利同比增71.89%】《科创板日报》23日讯，惠泰医疗发布业绩快报，2022年实现营业总收入12.17亿元，同比增长46.82%；净利润3.57亿元，同比增长71.89%；基本每股收益5.37元。	16:59_x000D_ 【惠泰医疗业绩快报：2022年净利同比增71.89%】《科创板日报》23日讯，惠泰医疗发布业绩快报，2022年实现营业总收入12.17亿元，同比增长46.82%；净利润3.57亿元，同比增长71.89%；基本每股收益5.37元。
20230524	【云路股份：董事郭克云拟减持不超过5.1938%】财联社5月24日电，云路股份公告，公司股东、董事郭克云拟通过集中竞价、大宗交易或协议转让方式减持不超过公司总股本5.1938%。	16:10:42_x000D_ 【云路股份：董事郭克云拟减持不超过5.1938%】财联社5月24日电，云路股份公告，公司股东、董事郭克云拟通过集中竞价、大宗交易或协议转让方式减持不超过公司总股本5.1938%。
20230815	【红蜻蜓：上半年净利同比增78.16%】财联社8月15日电，红蜻蜓披露半年报，上半年实现营业收入为12.44亿元，同比增长10.92%；净利润3748.01万元，同比增长78.16%；基本每股收益0.07元。	15:46:52_x000D_ 【红蜻蜓：上半年净利同比增78.16%】财联社8月15日电，红蜻蜓披露半年报，上半年实现营业收入为12.44亿元，同比增长10.92%；净利润3748.01万元，同比增长78.16%；基本每股收益0.07元。
20230824	【尔康制药：氨基己酸注射液通过仿制药一致性评价】财联社8月24日电，尔康制药公告，氨基己酸注射液通过仿制药一致性评价。氨基己酸注射液主要用于预防和治疗血纤维蛋白溶解亢进而引起的各种出血。	18:23:35_x000D_ 【尔康制药：氨基己酸注射液通过仿制药一致性评价】财联社8月24日电，尔康制药公告，氨基己酸注射液通过仿制药一致性评价。氨基己酸注射液主要用于预防和治疗血纤维蛋白溶解亢进而引起的各种出血。
20230831	13:39 _x000D_ [[+_+]]_x000D_ 专享 专享_x000D_ 【风口研报·公司】公司二季度业绩环比增长超200%，还拟投建高端光刻胶项目，叠加诚意满满的回购方案，未来发展新动能可期 解锁直达>>	13:39 _x000D_ [[+_+]]_x000D_ 专享 专享_x000D_ 【风口研报·公司】公司二季度业绩环比增长超200%，还拟投建高端光刻胶项目，叠加诚意满满的回购方案，未来发展新动能可期 解锁直达>>
20230417	14:30 _x000D_ [[+_+]]_x000D_ 专享 专享_x000D_ 【电报解读】科技部启动国家超算互联网部署工作，机构预计AI服务器2024年需求年增幅达114%，这家公司AI服务器全球占比第一 解锁直达>>	14:30 _x000D_ [[+_+]]_x000D_ 专享 专享_x000D_ 【电报解读】科技部启动国家超算互联网部署工作，机构预计AI服务器2024年需求年增幅达114%，这家公司AI服务器全球占比第一 解锁直达>>
20230426	【江苏吴中：拟定增募资不超12亿元】财联社4月26日电，江苏吴中公告，拟定增募资不超过12亿元，用于江苏吴中医药集团研发及产业化基地一期项目以及偿还银行贷款。	18:44:03_x000D_ 【江苏吴中：拟定增募资不超12亿元】财联社4月26日电，江苏吴中公告，拟定增募资不超过12亿元，用于江苏吴中医药集团研发及产业化基地一期项目以及偿还银行贷款。
20230314	【ST中利：临时管理人已入驻公司】财联社3月14日电，ST中利今日在互动平台表示，临时管理人已入驻公司。公司依法配合临时管理人开展相关重整工作，积极推进重整进展。	13:08_x000D_ 【ST中利：临时管理人已入驻公司】财联社3月14日电，ST中利今日在互动平台表示，临时管理人已入驻公司。公司依法配合临时管理人开展相关重整工作，积极推进重整进展。
20230425	【科伦药业：一季度净利润同比增长178%】财联社4月25日电，科伦药业公布2023年一季报，一季度实现实现营业收入56.01亿元，同比增长24.98%；净利润8.1亿元，同比增长178.10%。	18:52:03_x000D_ 【科伦药业：一季度净利润同比增长178%】财联社4月25日电，科伦药业公布2023年一季报，一季度实现实现营业收入56.01亿元，同比增长24.98%；净利润8.1亿元，同比增长178.10%。
20230417	【青龙管业：拟发行可转债募资不超过4亿元】财联社4月17日电，青龙管业公告，拟发行可转债募资不超过4亿元，用于年产70Km PCCP管材生产项目、年产7万吨防腐钢管生产项目。	19:09:22_x000D_ 【青龙管业：拟发行可转债募资不超过4亿元】财联社4月17日电，青龙管业公告，拟发行可转债募资不超过4亿元，用于年产70Km PCCP管材生产项目、年产7万吨防腐钢管生产项目。
20230620	22:01 _x000D_ [[+_+]]_x000D_ 专享 专享_x000D_ 【公告全知道】机器人+数据中心+云计算+人工智能+大数据+工业互联网！公司提供3D机器视觉智能工业机器人解决方案 解锁直达>>	22:01 _x000D_ [[+_+]]_x000D_ 专享 专享_x000D_ 【公告全知道】机器人+数据中心+云计算+人工智能+大数据+工业互联网！公司提供3D机器视觉智能工业机器人解决方案 解锁直达>>
20230215	【无锡振华：无锡瑾沣裕拟减持不超过3.75%股份】财联社2月15日电，无锡振华公告，股东无锡瑾沣裕拟减持公司股份不超过750万股，即不超过公司总股本的3.75%。	17:15_x000D_ 【无锡振华：无锡瑾沣裕拟减持不超过3.75%股份】财联社2月15日电，无锡振华公告，股东无锡瑾沣裕拟减持公司股份不超过750万股，即不超过公司总股本的3.75%。
20230111	【鑫磊股份中签号出炉：共3.81万个】财联社1月11日电，鑫磊股份披露网上中签结果，中签号码共38121个，每个中签号码能认购500股鑫磊股份A股股票。	20:52_x000D_ 【鑫磊股份中签号出炉：共3.81万个】财联社1月11日电，鑫磊股份披露网上中签结果，中签号码共38121个，每个中签号码能认购500股鑫磊股份A股股票。
20230907	【国际实业：决定终止前次非公开发行股票事项】财联社9月7日电，国际实业公告，公司已启动以简易方式向特定对象发行股票，决定终止前次非公开发行股票事项。	19:55:55_x000D_ 【国际实业：决定终止前次非公开发行股票事项】财联社9月7日电，国际实业公告，公司已启动以简易方式向特定对象发行股票，决定终止前次非公开发行股票事项。
20230202	10:42 _x000D_ [[+_+]]_x000D_ 专享 专享_x000D_ 【盘中宝】消费红包加速应用场景落地，该平台交易额同比增长高达12倍，这家公司相关产品已开始商用 解锁直达>>	10:42 _x000D_ [[+_+]]_x000D_ 专享 专享_x000D_ 【盘中宝】消费红包加速应用场景落地，该平台交易额同比增长高达12倍，这家公司相关产品已开始商用 解锁直达>>
20230828	【日本福岛县附近海域发生4.8级地震】财联社8月28日电，据日本气象厅消息，当地时间8月28日18时08分，日本福岛县附近海域发生4.8级地震，震度2级。	17:45:22_x000D_ 【日本福岛县附近海域发生4.8级地震】财联社8月28日电，据日本气象厅消息，当地时间8月28日18时08分，日本福岛县附近海域发生4.8级地震，震度2级。
20230214	【中马传动：公司实际控制人之一、原董事长吴江去世】财联社2月14日电，中马传动公告，公司实际控制人之一、原董事长吴江因病医治无效，不幸病逝。	15:36_x000D_ 【中马传动：公司实际控制人之一、原董事长吴江去世】财联社2月14日电，中马传动公告，公司实际控制人之一、原董事长吴江因病医治无效，不幸病逝。
20230220	2023.02.19 星期日 21:28 _x000D_ [[+_+]]_x000D_ 专享 专享_x000D_ 【狙击龙虎榜】人工智能有望持续反复 关注配合情绪冰点转折走出二波的可能 解锁直达>>	2023.02.19 星期日 21:28 _x000D_ [[+_+]]_x000D_ 专享 专享_x000D_ 【狙击龙虎榜】人工智能有望持续反复 关注配合情绪冰点转折走出二波的可能 解锁直达>>
20230217	【人人乐：永乐商管要约收购期限届满 2月20日复牌】财联社2月17日电，人人乐公告，永乐商管要约收购期限届满、有效接纳5万股，2月20日复牌。	17:43_x000D_ 【人人乐：永乐商管要约收购期限届满 2月20日复牌】财联社2月17日电，人人乐公告，永乐商管要约收购期限届满、有效接纳5万股，2月20日复牌。
20230510	【宿迁联盛：5月起公司产品全面涨价10%-20%不等】财联社5月10日电，宿迁联盛在互动平台表示，公司从5月起，产品全面涨价10%-20%不等。	08:33:15_x000D_ 【宿迁联盛：5月起公司产品全面涨价10%-20%不等】财联社5月10日电，宿迁联盛在互动平台表示，公司从5月起，产品全面涨价10%-20%不等。
20230510	12:52 _x000D_ [[+_+]]_x000D_ 专享 专享_x000D_ 【机构调研】这家电力设备供应商一季度业绩超预期，“充电桩+储能”业务加速扩张 解锁直达>>	12:52 _x000D_ [[+_+]]_x000D_ 专享 专享_x000D_ 【机构调研】这家电力设备供应商一季度业绩超预期，“充电桩+储能”业务加速扩张 解锁直达>>
20230823	19:34 _x000D_ [[+_+]]_x000D_ 专享 专享_x000D_ 【机构调研】这家综合检测龙头汽车等业务成为公司新亮点，已成为特斯拉供应商 解锁直达>>	19:34 _x000D_ [[+_+]]_x000D_ 专享 专享_x000D_ 【机构调研】这家综合检测龙头汽车等业务成为公司新亮点，已成为特斯拉供应商 解锁直达>>
20230227	【北向资金全天净卖出19亿元】财联社2月27日电，北向资金全天净卖出19.19亿元，其中，沪股通净卖出5.01亿元，深股通净卖出14.18亿元。	15:03_x000D_ 【北向资金全天净卖出19亿元】财联社2月27日电，北向资金全天净卖出19.19亿元，其中，沪股通净卖出5.01亿元，深股通净卖出14.18亿元。
20230703	【长盛轴承：百盛投资、徐晓林拟减持股份不超过3.02%】财联社7月3日电，长盛轴承公告，百盛投资、徐晓林拟减持股份不超过3.02%。	18:53:13_x000D_ 【长盛轴承：百盛投资、徐晓林拟减持股份不超过3.02%】财联社7月3日电，长盛轴承公告，百盛投资、徐晓林拟减持股份不超过3.02%。
20230821	【新兴铸管：上半年净利润同比下降21.2%】财联社8月21日电，新兴铸管公告，上半年净利润8.39亿元，同比下降21.2%。	22:19:16_x000D_ 【新兴铸管：上半年净利润同比下降21.2%】财联社8月21日电，新兴铸管公告，上半年净利润8.39亿元，同比下降21.2%。
20230321	【财联社3月21日早间新闻精选】1、当地时间3月20日下午，刚刚抵达莫斯科的国家主席习近平应约在克里姆林宫会见俄罗斯总统普京。双方就乌克兰问题深入交换意见。习近平强调，在乌克兰问题上，和平、理性的声音在不断积聚，大多数国家都支持缓和紧张局势，主张劝和促谈，反对火上浇油。历史上看，冲突最后都需要通过对话和谈判解决。不久前，中方专门发表了立场文件，呼吁政治解决乌克兰危机，反对冷战思维，反对单边制裁。我们认为，越是困难重重，越要为和平留下空间；越是矛盾尖锐，越不能放弃对话努力。中方愿继续为推动政治解决乌克兰问题发挥建设性作用。2、华为相关人士20日表示，“进军ERP市场”系误读，华为MetaERP管理系统仅供内部使用。目前华为已构筑起一套涵盖软件开发全流程、全环节的软件开发生产线，也计划将软件开发工具开放给外界使用，推动国产软件产业链高质量发展。3、杭州市交通运输局等6部门20日发布通知。通知…	08:20_x000D_ 【财联社3月21日早间新闻精选】_x000D_ _x000D_ 1、当地时间3月20日下午，刚刚抵达莫斯科的国家主席习近平应约在克里姆林宫会见俄罗斯总统普京。双方就乌克兰问题深入交换意见。习近平强调，在乌克兰问题上，和平、理性的声音在不断积聚，大多数国家都支持缓和紧张局势，主张劝和促谈，反对火上浇油。历史上看，冲突最后都需要通过对话和谈判解决。不久前，中方专门发表了立场文件，呼吁政治解决乌克兰危机，反对冷战思维，反对单边制裁。我们认为，越是困难重重，越要为和平留下空间；越是矛盾尖锐，越不能放弃对话努力。中方愿继续为推动政治解决乌克兰问题发挥建设性作用。_x000D_ _x000D_ 2、华为相关人士20日表示，“进军ERP市场”系误读，华为MetaERP管理系统仅供内部使用。目前华为已构筑起一套涵盖软件开发全流程、全环节的软件开发生产线，也计划将软件开发工具开放…
20230406	20:04 _x000D_ [[+_+]]_x000D_ 专享 专享_x000D_ 【机构调研】这家数据复制软件龙头市占率国内第一、全球第三 解锁直达>>	20:04 _x000D_ [[+_+]]_x000D_ 专享 专享_x000D_ 【机构调研】这家数据复制软件龙头市占率国内第一、全球第三 解锁直达>>
20230704	【中集SOE订单排至2026年 总在手订单金额近65亿元】财联社7月4日电，记者近日走访中集集团旗下中集安瑞科的中集太平洋海工了解到，截止6月底，公司总在手订单金额近65亿元，其中在手船舶订单17艘，排期至2026年，金额超40亿元。今年以来，公司全产品新签订单金额超28亿元，同比增加129%，其中近期签订的8艘船舶（不包括备选订单）超17亿元，今年以来签署生效的海工产品有超15套LNG燃料罐，订单金额超10亿元。中集安瑞科副总裁高文宝告诉财联社记者，公司正在接洽中的清洁能源动力船、运输船或加注船超过10艘。（财联社记者 胡皓琼）	12:16:10_x000D_ 【中集SOE订单排至2026年 总在手订单金额近65亿元】财联社7月4日电，记者近日走访中集集团旗下中集安瑞科的中集太平洋海工了解到，截止6月底，公司总在手订单金额近65亿元，其中在手船舶订单17艘，排期至2026年，金额超40亿元。今年以来，公司全产品新签订单金额超28亿元，同比增加129%，其中近期签订的8艘船舶（不包括备选订单）超17亿元，今年以来签署生效的海工产品有超15套LNG燃料罐，订单金额超10亿元。中集安瑞科副总裁高文宝告诉财联社记者，公司正在接洽中的清洁能源动力船、运输船或加注船超过10艘。（财联社记者 胡皓琼）
20230710	【澜起科技：公司在研AI芯片是针对大数据吞吐下的AI推理应用】财联社7月10日电，澜起科技接受机构调研时表示，随着AI应用的增长，需要配置GPU BOX的场景越来越多，将增加对PCIe Retimer芯片的需求。AI应用将带动对算力需求的持续增长，公司在研的AI芯片，正是针对大数据吞吐下的AI推理应用，目标是提升系统效率并为客户提供更有性价比的产品。	19:58:01_x000D_ 【澜起科技：公司在研AI芯片是针对大数据吞吐下的AI推理应用】财联社7月10日电，澜起科技接受机构调研时表示，随着AI应用的增长，需要配置GPU BOX的场景越来越多，将增加对PCIe Retimer芯片的需求。AI应用将带动对算力需求的持续增长，公司在研的AI芯片，正是针对大数据吞吐下的AI推理应用，目标是提升系统效率并为客户提供更有性价比的产品。
20230713	【唯捷创芯：L-PAMiD模组产品已通过部分国内品牌手机厂商的验证】财联社7月13日电，唯捷创芯在互动平台表示，根据需求的不同，5G手机可能采用分立方案，也可能采用高集成度模组方案，暨使用L-PAMiD模组产品。截至目前，公司的L-PAMiD模组产品已通过部分国内品牌手机厂商的验证。	20:40:34_x000D_ 【唯捷创芯：L-PAMiD模组产品已通过部分国内品牌手机厂商的验证】财联社7月13日电，唯捷创芯在互动平台表示，根据需求的不同，5G手机可能采用分立方案，也可能采用高集成度模组方案，暨使用L-PAMiD模组产品。截至目前，公司的L-PAMiD模组产品已通过部分国内品牌手机厂商的验证。
20230718	【五芳斋回应“端午销量下行”：传言与公司实际情况严重不符】财联社7月18日电，有投资者提问：“网上有相关媒体报道，五芳斋今年端午销量下行，大量礼盒卖不动，请问情况属实吗？”五芳斋在互动平台表示，上述传言与公司实际情况严重不符，目前公司生产和经营一切正常，二季度具体销售情况请以公司后续公开披露的公告为准。	08:54:55_x000D_ 【五芳斋回应“端午销量下行”：传言与公司实际情况严重不符】财联社7月18日电，有投资者提问：“网上有相关媒体报道，五芳斋今年端午销量下行，大量礼盒卖不动，请问情况属实吗？”五芳斋在互动平台表示，上述传言与公司实际情况严重不符，目前公司生产和经营一切正常，二季度具体销售情况请以公司后续公开披露的公告为准。
20230726	【两部门：到2025年系统形成能够支撑组合驾驶辅助和自动驾驶通用功能的智能网联汽车标准体系】财联社7月26日电，工业和信息化部、国家标准化管理委员会印发《国家车联网产业标准体系建设指南（智能网联汽车）（2023版）》的通知。通知提出，第一阶段到2025年，系统形成能够支撑组合驾驶辅助和自动驾驶通用功能的智能网联汽车标准体系。制修订100项以上智能网联汽车相关标准，涵盖组合驾驶辅助、自动驾驶关键系统、网联基础功能及操作系统、高性能计算芯片及数据应用等标准，并贯穿功能安全、预期功能安全、网络安全和数据安全等安全标准，满足智能网联汽车技术、产业发展和政府管理对标准化的需求。第二阶段到2030年，全面形成能够支撑实现单车智能和网联赋能协同发展的智能网联汽车标准体系。制修订140项以上智能网联汽车相关标准并建立实施效果评估和动态完善机制，满足组合驾驶辅助、自动驾驶和网联功能全场景应用需求，建立健全…	17:20:25_x000D_ 【两部门：到2025年系统形成能够支撑组合驾驶辅助和自动驾驶通用功能的智能网联汽车标准体系】财联社7月26日电，工业和信息化部、国家标准化管理委员会印发《国家车联网产业标准体系建设指南（智能网联汽车）（2023版）》的通知。通知提出，第一阶段到2025年，系统形成能够支撑组合驾驶辅助和自动驾驶通用功能的智能网联汽车标准体系。制修订100项以上智能网联汽车相关标准，涵盖组合驾驶辅助、自动驾驶关键系统、网联基础功能及操作系统、高性能计算芯片及数据应用等标准，并贯穿功能安全、预期功能安全、网络安全和数据安全等安全标准，满足智能网联汽车技术、产业发展和政府管理对标准化的需求。第二阶段到2030年，全面形成能够支撑实现单车智能和网联赋能协同发展的智能网联汽车标准体系。制修订140项以上智能网联汽车相关标准并建立实施效果评估和动态完善机制，满足组合驾驶辅助、自动驾驶和…
20230511	【午评：创业板指延续反弹涨超1% AI应用方向再度爆发】财联社5月11日电，市场早盘走势分化，沪指震荡微跌，创业板指延续反弹。盘面上，AI应用方向再度爆发，教育、传媒等方向领涨，荣信文化、华策影视、新华传媒、中国电影、慈文传媒等超20股涨停；智能音箱概念股表现活跃，中科蓝讯、奋达科技、国光电器、惠威科技涨停。工业母机概念股盘中异动，华东数控、秦川机床涨停。锂电池等赛道股延续反弹，宝明科技3连板，达志科技涨超10%。下跌方面，中字头、一带一路概念股集体调整，中国外运、中船科技、新疆交建等跌停。总体上个股涨多跌少，两市超3300只个上涨。沪深两市今日成交额5829亿，较上个交易日缩量624亿。板块方面，教育、传媒、手机游戏、智能音箱等板块涨幅居前，中船系、中字头、液冷服务器、中药等板块跌幅居前。截至上午收盘，沪指跌0.11%，深成指涨0.41%，创业板指涨1.04%。北向资金方面，其中沪股通…	11:32:49_x000D_ 【午评：创业板指延续反弹涨超1% AI应用方向再度爆发】财联社5月11日电，市场早盘走势分化，沪指震荡微跌，创业板指延续反弹。盘面上，AI应用方向再度爆发，教育、传媒等方向领涨，荣信文化、华策影视、新华传媒、中国电影、慈文传媒等超20股涨停；智能音箱概念股表现活跃，中科蓝讯、奋达科技、国光电器、惠威科技涨停。工业母机概念股盘中异动，华东数控、秦川机床涨停。锂电池等赛道股延续反弹，宝明科技3连板，达志科技涨超10%。下跌方面，中字头、一带一路概念股集体调整，中国外运、中船科技、新疆交建等跌停。总体上个股涨多跌少，两市超3300只个上涨。沪深两市今日成交额5829亿，较上个交易日缩量624亿。板块方面，教育、传媒、手机游戏、智能音箱等板块涨幅居前，中船系、中字头、液冷服务器、中药等板块跌幅居前。截至上午收盘，沪指跌0.11%，深成指涨0.41%，创业板指涨1.…
20230517	【福元医药：沙格列汀二甲双胍缓释片获得药品注册证书】财联社5月17日电，福元医药公告，公司近日收到了国家药监局颁发的沙格列汀二甲双胍缓释片（Ⅰ）（规格：每片含沙格列汀5mg与盐酸二甲双胍1000mg）、沙格列汀二甲双胍缓释片（Ⅲ）（规格：每片含沙格列汀2.5mg与盐酸二甲双胍1000mg）《药品注册证书》，批准该药品生产。	17:10:26_x000D_ 【福元医药：沙格列汀二甲双胍缓释片获得药品注册证书】财联社5月17日电，福元医药公告，公司近日收到了国家药监局颁发的沙格列汀二甲双胍缓释片（Ⅰ）（规格：每片含沙格列汀5mg与盐酸二甲双胍1000mg）、沙格列汀二甲双胍缓释片（Ⅲ）（规格：每片含沙格列汀2.5mg与盐酸二甲双胍1000mg）《药品注册证书》，批准该药品生产。
20230529	14:48 _x000D_ [[+_+]]_x000D_ 专享 专享_x000D_ 【电报解读】十八部门发文重点提及探索利用人工智能等技术手段弥补优质教育教学资源不足状况，2022年AI+教育行业市场规模近650亿元，这家企业推动AI在职业	14:48 _x000D_ [[+_+]]_x000D_ 专享 专享_x000D_ 【电报解读】十八部门发文重点提及探索利用人工智能等技术手段弥补优质教育教学资源不足状况，2022年AI+教育行业市场规模近650亿元，这家企业推动AI在职业教育应用下的场景设计、研发、创新和落地等 解锁直达>>
20230529	【午评：创业板指跌超1%再创调整新低 新能源赛道股持续走弱】财联社5月29日电，市场早盘震荡分化，三大指数涨跌不一，创业板指跌超1%再创调整新低。盘面上，AI概念股继续活跃，CPO方向领涨，东田微、金百泽20CM涨停；游戏股盘中拉升，顺网科技20CM涨停，姚记科技、巨人网络涨停。电力股震荡走强，桂东电力、恒盛能源、天富能源涨停。脑机接口概念股开盘大涨，爱朋医疗20CM涨停，新智认知、创新医疗涨停。下跌方面，新能源赛道股持续走弱，天合光能跌超10%，派能科技、钧达股份等跌超5%。总体上个股跌多涨少，两市超3000只个下跌。沪深两市今日成交额6014亿，较上个交易日放量992亿。板块方面，脑机接口、CPO、游戏、电力等板块涨幅居前，一体化压铸、HJT电池、汽车整车、电商等板块跌幅居前。截至上午收盘，沪指涨0.15%，深成指跌0.82%，创业板指跌1.18%。北向资金方面，其中沪股通早盘净流入…	11:33:16_x000D_ 【午评：创业板指跌超1%再创调整新低 新能源赛道股持续走弱】财联社5月29日电，市场早盘震荡分化，三大指数涨跌不一，创业板指跌超1%再创调整新低。盘面上，AI概念股继续活跃，CPO方向领涨，东田微、金百泽20CM涨停；游戏股盘中拉升，顺网科技20CM涨停，姚记科技、巨人网络涨停。电力股震荡走强，桂东电力、恒盛能源、天富能源涨停。脑机接口概念股开盘大涨，爱朋医疗20CM涨停，新智认知、创新医疗涨停。下跌方面，新能源赛道股持续走弱，天合光能跌超10%，派能科技、钧达股份等跌超5%。总体上个股跌多涨少，两市超3000只个下跌。沪深两市今日成交额6014亿，较上个交易日放量992亿。板块方面，脑机接口、CPO、游戏、电力等板块涨幅居前，一体化压铸、HJT电池、汽车整车、电商等板块跌幅居前。截至上午收盘，沪指涨0.15%，深成指跌0.82%，创业板指跌1.18%。北…
20230702	【巨轮智能：公司近期经营情况正常】财联社7月2日电，巨轮智能发布股票交易异常波动公告，公司未发现近期公共传媒报道了可能或已经对公司股票交易价格产生较大影响的未公开重大信息；公司近期经营情况正常，内外部经营环境未发生重大变化。	16:23:52_x000D_ 【巨轮智能：公司近期经营情况正常】财联社7月2日电，巨轮智能发布股票交易异常波动公告，公司未发现近期公共传媒报道了可能或已经对公司股票交易价格产生较大影响的未公开重大信息；公司近期经营情况正常，内外部经营环境未发生重大变化。
20230707	【国机汽车：全资公司被审查起诉】财联社7月7日电，国机汽车公告，公司全资子公司中国汽车工业工程有限公司的全资子公司机械工业第四设计研究院有限公司（简称“机械四院”）7月6日收到江苏省苏州市吴中区人民检察院的《犯罪嫌疑人诉讼权利义务告知书》。机械四院涉嫌串通投标罪一案，已由苏州市公安局直属分局移送至江苏省苏州市吴中区人民检察院起诉。2017年5月至6月间，江苏赛麟汽车科技有限公司就其“赛麟汽车项目EPC总承包项目”进行招标，机械四院参与联合体投标并中标。2020年11月，机械四院上海分公司相关工作人员因涉嫌串通投标被苏州市公安局直属分局采取强制措施，现《告知书》首次明确机械四院为犯罪嫌疑人。截至目前，公司生产经营正常，上述事件暂未对机械四院的业务运作产生重大影响。	19:20:13_x000D_ 【国机汽车：全资公司被审查起诉】财联社7月7日电，国机汽车公告，公司全资子公司中国汽车工业工程有限公司的全资子公司机械工业第四设计研究院有限公司（简称“机械四院”）7月6日收到江苏省苏州市吴中区人民检察院的《犯罪嫌疑人诉讼权利义务告知书》。机械四院涉嫌串通投标罪一案，已由苏州市公安局直属分局移送至江苏省苏州市吴中区人民检察院起诉。2017年5月至6月间，江苏赛麟汽车科技有限公司就其“赛麟汽车项目EPC总承包项目”进行招标，机械四院参与联合体投标并中标。2020年11月，机械四院上海分公司相关工作人员因涉嫌串通投标被苏州市公安局直属分局采取强制措施，现《告知书》首次明确机械四院为犯罪嫌疑人。截至目前，公司生产经营正常，上述事件暂未对机械四院的业务运作产生重大影响。
20230714	【英派斯：上半年净利同比预增113.08%-177.65%】财联社7月14日电，英派斯公告，预计上半年净利3300万元-4300万元，同比增长113.08%-177.65%。上半年，受人民币对美元汇率贬值影响，国外销售收入较去年同期明显增加。	16:33:23_x000D_ 【英派斯：上半年净利同比预增113.08%-177.65%】财联社7月14日电，英派斯公告，预计上半年净利3300万元-4300万元，同比增长113.08%-177.65%。上半年，受人民币对美元汇率贬值影响，国外销售收入较去年同期明显增加。
20230715	【美媒：美三大芯片巨头CEO将赴华盛顿 游说拜登放弃对华出口新限制】财联社7月15日电，彭博社15日援引知情人士消息，美国三大芯片巨头首席执行官（CEO）将于下周前往华盛顿与美政府官员和议员举行会谈，游说拜登放弃出台新的对华芯片出口限制。报道说，据知情人士透露，这三家芯片巨头是英特尔、高通和英伟达，虽然他们并不指望能阻止美政府所有相关行动，但他们察觉到了一个机会窗口，他们希望让拜登政府相信，事态升级将损害白宫与中方当前接触以及建立更富有成效关系的外交努力。 (环球网)	13:11:49_x000D_ 【美媒：美三大芯片巨头CEO将赴华盛顿 游说拜登放弃对华出口新限制】财联社7月15日电，彭博社15日援引知情人士消息，美国三大芯片巨头首席执行官（CEO）将于下周前往华盛顿与美政府官员和议员举行会谈，游说拜登放弃出台新的对华芯片出口限制。报道说，据知情人士透露，这三家芯片巨头是英特尔、高通和英伟达，虽然他们并不指望能阻止美政府所有相关行动，但他们察觉到了一个机会窗口，他们希望让拜登政府相信，事态升级将损害白宫与中方当前接触以及建立更富有成效关系的外交努力。 (环球网)
20230717	【亚星客车：收到1.5亿元国家新能源汽车推广补贴】财联社7月17日电，亚星客车公告，公司收到扬州市财政局转支付的2022年国家节能减排补助资金1.5亿元，用于2016-2019年度新能源汽车推广应用补助资金清算和2019-2020年度新能源汽车推广应用补助资金预拨。	18:31:12_x000D_ 【亚星客车：收到1.5亿元国家新能源汽车推广补贴】财联社7月17日电，亚星客车公告，公司收到扬州市财政局转支付的2022年国家节能减排补助资金1.5亿元，用于2016-2019年度新能源汽车推广应用补助资金清算和2019-2020年度新能源汽车推广应用补助资金预拨。
20230822	【深成指跌逾1% 沪指年线转绿】财联社8月22日电，指数持续走低，深成指跌逾1%，创业板指跌近1.5%，沪指跌近0.4%，抹去年内涨幅。医药医疗、环保、食品消费等方向跌幅居前，两市下跌个股近4200只。	13:23:22_x000D_ 【深成指跌逾1% 沪指年线转绿】财联社8月22日电，指数持续走低，深成指跌逾1%，创业板指跌近1.5%，沪指跌近0.4%，抹去年内涨幅。医药医疗、环保、食品消费等方向跌幅居前，两市下跌个股近4200只。
20230824	【外交部：日方强行排放核污染水极端自私不负责任】财联社8月24日电，外交部发言人24日就日本政府启动福岛核污染水排海发表谈话：8月24日，日本政府无视国际社会的强烈质疑和反对，单方面强行启动福岛核事故污染水排海，中方对此表示坚决反对和强烈谴责，已向日方提出严正交涉，要求日方停止这一错误行为。日本福岛核污染水处置是重大的核安全问题，具有跨国界影响，绝不是日本一家的私事。自人类和平利用核能以来，人为向海洋排放核事故污染水没有先例，也没有公认的处置标准。12年前发生的福岛核事故已经造成严重灾难，向海洋释放了大量的放射性物质。日方不应出于一己之私利，给当地民众乃至世界人民造成二次伤害。日本政府没有证明排海决定的正当合法性，没有证明核污染水净化装置的长期可靠性，没有证明核污染水数据的真实准确性，没有证明排海对海洋环境和人类健康安全无害，没有证明监测方案的完善性和有效性，也没有同利益攸关方充分协商。…	12:18:14_x000D_ 【外交部：日方强行排放核污染水极端自私不负责任】财联社8月24日电，外交部发言人24日就日本政府启动福岛核污染水排海发表谈话：_x000D_ _x000D_ _x000D_ _x000D_ 8月24日，日本政府无视国际社会的强烈质疑和反对，单方面强行启动福岛核事故污染水排海，中方对此表示坚决反对和强烈谴责，已向日方提出严正交涉，要求日方停止这一错误行为。_x000D_ _x000D_ _x000D_ _x000D_ 日本福岛核污染水处置是重大的核安全问题，具有跨国界影响，绝不是日本一家的私事。自人类和平利用核能以来，人为向海洋排放核事故污染水没有先例，也没有公认的处置标准。12年前发生的福岛核事故已经造成严重灾难，向海洋释放了大量的放射性物质。日方不应出于一己之私利，给当地民众乃至世界人民造成二次伤害。_x000D_ _x000D_ _x000D_ _x0…
20230908	【港交所全日停市】财联社9月8日电，由于香港特区政府今日（8日）宣布极端情况至少维持至下午6时，根据港交所相关安排，证券（包括沪深股通）及衍生产品市场将会全日暂停交易。 (大湾区之声)	11:09:33_x000D_ 【港交所全日停市】财联社9月8日电，由于香港特区政府今日（8日）宣布极端情况至少维持至下午6时，根据港交所相关安排，证券（包括沪深股通）及衍生产品市场将会全日暂停交易。 (大湾区之声)
20230730	【广州出台城中村改造新政】财联社7月30日电，广州出台城中村改造新政。市规划和自然资源局有关负责人在媒体解读会上透露，最新出台的第三批惠企利民措施主要有五大亮点：优化流程，压缩时限，降低企业时间成本；降低成本，破解难题，缓解企业资金压力；优化标准，创新服务，提升审批服务效能；精准施策，积极探索，推进城中村改造；刚弹结合，保障需求，优化停车泊位配建设置。	14:03:55_x000D_ 【广州出台城中村改造新政】财联社7月30日电，广州出台城中村改造新政。市规划和自然资源局有关负责人在媒体解读会上透露，最新出台的第三批惠企利民措施主要有五大亮点：优化流程，压缩时限，降低企业时间成本；降低成本，破解难题，缓解企业资金压力；优化标准，创新服务，提升审批服务效能；精准施策，积极探索，推进城中村改造；刚弹结合，保障需求，优化停车泊位配建设置。
20230804	【中国人寿：赵鹏辞去总裁等职务 利明光继任】财联社8月4日电，中国人寿公告，因工作变动，赵鹏已于2023年8月4日向公司提出辞任公司总裁、执行董事及战略与资产负债管理委员会委员职务，该辞任自同日起生效。经第七届董事会第二十七次会议审议通过，利明光已获委任为公司总裁，其担任公司总裁的任职资格尚待国家金融监督管理总局核准。核准通过前，董事会指定利明光为公司临时负责人。	17:02:06_x000D_ 【中国人寿：赵鹏辞去总裁等职务 利明光继任】财联社8月4日电，中国人寿公告，因工作变动，赵鹏已于2023年8月4日向公司提出辞任公司总裁、执行董事及战略与资产负债管理委员会委员职务，该辞任自同日起生效。经第七届董事会第二十七次会议审议通过，利明光已获委任为公司总裁，其担任公司总裁的任职资格尚待国家金融监督管理总局核准。核准通过前，董事会指定利明光为公司临时负责人。
20230806	20:14 _x000D_ [[+_+]]_x000D_ 专享 专享_x000D_ 【风口研报·行业】历次行情都比券商弹性更大的方向，高层会议定调资本市场，分析师强call这家公司有望以黑马姿态冲击格局；机构策略看好行情或从金融、地产扩散至	20:14 _x000D_ [[+_+]]_x000D_ 专享 专享_x000D_ 【风口研报·行业】历次行情都比券商弹性更大的方向，高层会议定调资本市场，分析师强call这家公司有望以黑马姿态冲击格局；机构策略看好行情或从金融、地产扩散至消费、TMT 解锁直达>>
20230808	【中房报调查：超9成调查者希望直接下调存量房贷利率】财联社8月8日电，据中国房地产报消息，通过从中房报在线发起的“存量房贷利率下调调查”问卷回收结果来看，比起“商转公”、发放利率优惠券等方法，超9成的网友选择希望用最直接的方法来下调存量房贷利率。本次调查采用在线问卷调查的方式，调查对象为拥有个人住房贷款的消费者。	10:18:09_x000D_ 【中房报调查：超9成调查者希望直接下调存量房贷利率】财联社8月8日电，据中国房地产报消息，通过从中房报在线发起的“存量房贷利率下调调查”问卷回收结果来看，比起“商转公”、发放利率优惠券等方法，超9成的网友选择希望用最直接的方法来下调存量房贷利率。本次调查采用在线问卷调查的方式，调查对象为拥有个人住房贷款的消费者。
20230809	【同和药业：替格瑞洛获得欧洲药典适应性证书】财联社8月9日电，同和药业公告，近日收到欧洲药品质量管理局（EDQM）颁发的替格瑞洛欧洲药典适应性证书（CEP）。替格瑞洛用于治疗急性冠脉综合征患者，减少血栓性心血管疾病的发生。	15:51:38_x000D_ 【同和药业：替格瑞洛获得欧洲药典适应性证书】财联社8月9日电，同和药业公告，近日收到欧洲药品质量管理局（EDQM）颁发的替格瑞洛欧洲药典适应性证书（CEP）。替格瑞洛用于治疗急性冠脉综合征患者，减少血栓性心血管疾病的发生。
20230315	【美晨生态：工业大麻尚未产业化种植 目前主要侧重于纤维麻的小批量试种】财联社3月15日电，美晨生态在互动平台表示，公司下属公司有苗圃种植、蔬菜种植等，工业大麻尚未产业化种植，目前主要侧重于纤维麻的小批量试种。	16:07_x000D_ 【美晨生态：工业大麻尚未产业化种植 目前主要侧重于纤维麻的小批量试种】财联社3月15日电，美晨生态在互动平台表示，公司下属公司有苗圃种植、蔬菜种植等，工业大麻尚未产业化种植，目前主要侧重于纤维麻的小批量试种。
20230327	2023.03.26 星期日 22:11 _x000D_ [[+_+]]_x000D_ 专享 专享_x000D_ 【公告全知道】数字经济+ChatGPT+信创+AIGC+算力+人工智能！大数据解决方案服务商基于NLP等技术构建预训练大模型	2023.03.26 星期日 22:11 _x000D_ [[+_+]]_x000D_ 专享 专享_x000D_ 【公告全知道】数字经济+ChatGPT+信创+AIGC+算力+人工智能！大数据解决方案服务商基于NLP等技术构建预训练大模型 解锁直达>>
20230329	【中国中冶：2022年净利102.72亿元 同比增长22.66%】财联社3月29日电，中国中冶披露年报，2022年公司实现营业收入5926.69亿元，同比增长18.4%；净利润102.72亿元，同比增长22.66%；基本每股收益0.45元；公司拟每10股派发红利0.83元(含税)。	19:42_x000D_ 【中国中冶：2022年净利102.72亿元 同比增长22.66%】财联社3月29日电，中国中冶披露年报，2022年公司实现营业收入5926.69亿元，同比增长18.4%；净利润102.72亿元，同比增长22.66%；基本每股收益0.45元；公司拟每10股派发红利0.83元(含税)。
20230405	【中国要求美日荷澄清是否存在芯片出口限制协议】财联社4月5日电，世界贸易组织货物贸易理事会当地时间4月3日至4日举行会议。中国在此次会议上，对"美国、日本和荷兰之间关于芯片出口限制的协议 "提出关切。中国代表表示，对于媒体广泛曝光的这一协议，目前还没有官方信息。中国询问这三个世贸组织成员，该协议是否存在？如果存在的话，是否应该通知世贸组织成员并由世贸组织成员审查？中国代表指出，相关成员可能清楚地意识到该协议违反了世贸组织的规则，因此故意对该协议的内容保持低调。中国认为该协议违背了世贸组织的公开透明原则，破坏了世贸组织规则的权威性和有效性，要求美国、日本和荷兰向世贸组织通报该协议和后续措施，并呼吁世贸组织加强对这些措施的监督。 (央视新闻)	08:15:54_x000D_ 【中国要求美日荷澄清是否存在芯片出口限制协议】财联社4月5日电，世界贸易组织货物贸易理事会当地时间4月3日至4日举行会议。中国在此次会议上，对"美国、日本和荷兰之间关于芯片出口限制的协议 "提出关切。中国代表表示，对于媒体广泛曝光的这一协议，目前还没有官方信息。中国询问这三个世贸组织成员，该协议是否存在？如果存在的话，是否应该通知世贸组织成员并由世贸组织成员审查？中国代表指出，相关成员可能清楚地意识到该协议违反了世贸组织的规则，因此故意对该协议的内容保持低调。中国认为该协议违背了世贸组织的公开透明原则，破坏了世贸组织规则的权威性和有效性，要求美国、日本和荷兰向世贸组织通报该协议和后续措施，并呼吁世贸组织加强对这些措施的监督。 (央视新闻)
20230406	【福莱特：签订80.51亿元光伏压延玻璃销售战略框架合同】财联社4月6日电，福莱特公告，正泰新能及其子公司计划于2023年7月-2025年12月向公司及子公司采购约37,800万平方米光伏压延玻璃，按当前市场价格测算，预计销售总金额约80.51亿元人民币。	16:15:36_x000D_ 【福莱特：签订80.51亿元光伏压延玻璃销售战略框架合同】财联社4月6日电，福莱特公告，正泰新能及其子公司计划于2023年7月-2025年12月向公司及子公司采购约37,800万平方米光伏压延玻璃，按当前市场价格测算，预计销售总金额约80.51亿元人民币。
20230327	【独家|百度智能云相关“文心一言”应用产品今日发布会取消】《科创板日报》27日讯，百度智能云原定今日（3月27日）举行新品发布会，发布系列“文心一言”相关的云服务和应用产品。《科创板日报》记者从接近百度内部人士获悉， 该发布会已取消，“对外发布的会议没有了，改为面向首批邀约测试企业的闭门沟通会”。(记者 黄心怡 毛明江)	10:17_x000D_ 【独家|百度智能云相关“文心一言”应用产品今日发布会取消】《科创板日报》27日讯，百度智能云原定今日（3月27日）举行新品发布会，发布系列“文心一言”相关的云服务和应用产品。《科创板日报》记者从接近百度内部人士获悉， 该发布会已取消，“对外发布的会议没有了，改为面向首批邀约测试企业的闭门沟通会”。(记者 黄心怡 毛明江)
20230406	【实控人离婚拟分割6.25%公司股份 三六零竞价低开4.38%】财联社4月6日电，受实控人离婚消息影响，三六零竞价低开4.38%，报19.2元。消息面上，三六零公告，实控人周鸿祎离婚，拟将6.25%公司股份分割至胡欢女士名下。	09:27:25_x000D_ 【实控人离婚拟分割6.25%公司股份 三六零竞价低开4.38%】财联社4月6日电，受实控人离婚消息影响，三六零竞价低开4.38%，报19.2元。消息面上，三六零公告，实控人周鸿祎离婚，拟将6.25%公司股份分割至胡欢女士名下。
20230411	【国家网信办：利用生成式人工智能生成的内容应当真实准确 采取措施防止生成虚假信息】财联社4月11日电，国家互联网信息办公室就《生成式人工智能服务管理办法（征求意见稿）》公开征求意见。其中提到，提供生成式人工智能产品或服务应当遵守法律法规的要求，尊重社会公德、公序良俗，符合以下要求：（一）利用生成式人工智能生成的内容应当体现社会主义核心价值观，不得含有颠覆国家政权、推翻社会主义制度，煽动分裂国家、破坏国家统一，宣扬恐怖主义、极端主义，宣扬民族仇恨、民族歧视，暴力、淫秽色情信息，虚假信息，以及可能扰乱经济秩序和社会秩序的内容。（二）在算法设计、训练数据选择、模型生成和优化、提供服务等过程中，采取措施防止出现种族、民族、信仰、国别、地域、性别、年龄、职业等歧视。（三）尊重知识产权、商业道德，不得利用算法、数据、平台等优势实施不公平竞争。（四）利用生成式人工智能生成的内容应当真实准确，采取措施防…	12:57:38_x000D_ 【国家网信办：利用生成式人工智能生成的内容应当真实准确 采取措施防止生成虚假信息】财联社4月11日电，国家互联网信息办公室就《生成式人工智能服务管理办法（征求意见稿）》公开征求意见。其中提到，提供生成式人工智能产品或服务应当遵守法律法规的要求，尊重社会公德、公序良俗，符合以下要求：_x000D_ _x000D_ _x000D_ _x000D_ （一）利用生成式人工智能生成的内容应当体现社会主义核心价值观，不得含有颠覆国家政权、推翻社会主义制度，煽动分裂国家、破坏国家统一，宣扬恐怖主义、极端主义，宣扬民族仇恨、民族歧视，暴力、淫秽色情信息，虚假信息，以及可能扰乱经济秩序和社会秩序的内容。_x000D_ _x000D_ _x000D_ _x000D_ （二）在算法设计、训练数据选择、模型生成和优化、提供服务等过程中，采取措施防止出现种族、民族、信仰、国别、地域…
20230115	17:31 _x000D_ [[+_+]]_x000D_ 专享 专享_x000D_ 【风口研报·公司】今明两年业绩有望大增450%，这家公司手握“独家光伏胶膜+无氟专利背板+各类锂电膜材”，2023年有望踏上HJT爆发浪潮实现放量 解锁直达	17:31 _x000D_ [[+_+]]_x000D_ 专享 专享_x000D_ 【风口研报·公司】今明两年业绩有望大增450%，这家公司手握“独家光伏胶膜+无氟专利背板+各类锂电膜材”，2023年有望踏上HJT爆发浪潮实现放量 解锁直达>>
20230303	【龙虎榜|浪潮信息跌停 深股通、机构买卖活跃】财联社3月3日电，浪潮信息今日跌停，深股通买入3629.6万元，机构买入1942万元并卖出4920万元，东北证券泉州丰泽街营业部卖出上亿元。	16:28_x000D_ 【龙虎榜|浪潮信息跌停 深股通、机构买卖活跃】财联社3月3日电，浪潮信息今日跌停，深股通买入3629.6万元，机构买入1942万元并卖出4920万元，东北证券泉州丰泽街营业部卖出上亿元。
20230312	【潘石屹：从未在硅谷银行开过户存过款】财联社3月12日电，SOHO中国董事长潘石屹3月12日发布微博回应“踩雷硅谷银行”称，“我们从来没有在硅谷银行开过户，从来没有存过款。”	18:50_x000D_ 【潘石屹：从未在硅谷银行开过户存过款】财联社3月12日电，SOHO中国董事长潘石屹3月12日发布微博回应“踩雷硅谷银行”称，“我们从来没有在硅谷银行开过户，从来没有存过款。”
20230129	【西部证券：2022年净利同比预降66%–71%】财联社1月29日电，西部证券公告，公司预计2022年净利润4.04亿元–4.74亿元，比上年同期下降66.41%–71.37%。公司营业收入较上年同期减少，主要系投资业务、证券经纪业务、信用业务、投资银行业务及研究发展业务收入减少所致，本期归属于上市公司股东的净利润较上年同期大幅下降。	20:43_x000D_ 【西部证券：2022年净利同比预降66%–71%】财联社1月29日电，西部证券公告，公司预计2022年净利润4.04亿元–4.74亿元，比上年同期下降66.41%–71.37%。公司营业收入较上年同期减少，主要系投资业务、证券经纪业务、信用业务、投资银行业务及研究发展业务收入减少所致，本期归属于上市公司股东的净利润较上年同期大幅下降。
20230313	【赛轮轮胎：拟以4亿元-8亿元回购股份】财联社3月13日电，赛轮轮胎公告，拟以4亿元-8亿元回购股份，回购价格不超过13.5元/股。	17:49_x000D_ 【赛轮轮胎：拟以4亿元-8亿元回购股份】财联社3月13日电，赛轮轮胎公告，拟以4亿元-8亿元回购股份，回购价格不超过13.5元/股。
20230322	【锂电池板块持续反弹 宁德时代本周至今累涨8%】财联社3月22日电，锂电池板块早盘延续昨日午后反弹势头，宁德时代本周至今累计上涨超8%，总市值重新逼近万亿元大关，蔚蓝锂芯、长荣股份涨超5%，新宙邦、华友钴业涨超3%。消息面上，宁德时代的当家王牌技术麒麟电池已经实现量产，在相同的化学体系、同等电池包尺寸下，麒麟电池包的电量，相比4680大圆柱型电池系统可以提升13%。去年11月底，麒麟电池被美国《时代》周刊(TIME)评为2022年度最佳发明。	09:56_x000D_ 【锂电池板块持续反弹 宁德时代本周至今累涨8%】财联社3月22日电，锂电池板块早盘延续昨日午后反弹势头，宁德时代本周至今累计上涨超8%，总市值重新逼近万亿元大关，蔚蓝锂芯、长荣股份涨超5%，新宙邦、华友钴业涨超3%。消息面上，宁德时代的当家王牌技术麒麟电池已经实现量产，在相同的化学体系、同等电池包尺寸下，麒麟电池包的电量，相比4680大圆柱型电池系统可以提升13%。去年11月底，麒麟电池被美国《时代》周刊(TIME)评为2022年度最佳发明。
20230407	【天鹅股份：2022年度净利同比增长59% 拟10派1.42元】财联社4月7日电，天鹅股份公告，2022年度净利润5738万元，同比增长58.81%，拟10派1.42元。	17:02:25_x000D_ 【天鹅股份：2022年度净利同比增长59% 拟10派1.42元】财联社4月7日电，天鹅股份公告，2022年度净利润5738万元，同比增长58.81%，拟10派1.42元。
20230410	【国联股份：已在智能推荐、机器视觉等AI领域进行大量研究和应用】财联社4月10日电，国联股份在互动平台表示，在过去几年里，公司已经在AI领域进行了大量的研究和应用，尤其是在智能推荐、销售预测、采购预测和机器视觉等领域。其中，应用机器视觉技术，通过相机和传感器等设备来监控生产线上的生产过程、人员行为分析、仓库的货位异常变动、火灾报警等，在工厂安全管理方面可以极大提高安全监测和控制的精准度和效率，帮助企业实现更加智能化和高效的生产管理，为保障工人的人身安全和生产的稳定性做出贡献。 在ChatGPT方面，作为重要的新型人工智能技术，ChatGPT算法在产业数字化、经济数字化上打开了发展新思路。公司目前正在尝试接入，目前处于测试阶段。	09:55:43_x000D_ 【国联股份：已在智能推荐、机器视觉等AI领域进行大量研究和应用】财联社4月10日电，国联股份在互动平台表示，在过去几年里，公司已经在AI领域进行了大量的研究和应用，尤其是在智能推荐、销售预测、采购预测和机器视觉等领域。其中，应用机器视觉技术，通过相机和传感器等设备来监控生产线上的生产过程、人员行为分析、仓库的货位异常变动、火灾报警等，在工厂安全管理方面可以极大提高安全监测和控制的精准度和效率，帮助企业实现更加智能化和高效的生产管理，为保障工人的人身安全和生产的稳定性做出贡献。 在ChatGPT方面，作为重要的新型人工智能技术，ChatGPT算法在产业数字化、经济数字化上打开了发展新思路。公司目前正在尝试接入，目前处于测试阶段。
20230417	【吉比特：控股股东卢竑岩拟减持不超过2.7763%】财联社4月17日电，吉比特公告，持股30.03%的控股股东、董事长兼总经理卢竑岩拟减持不超过2.7763%.	15:36:25_x000D_ 【吉比特：控股股东卢竑岩拟减持不超过2.7763%】财联社4月17日电，吉比特公告，持股30.03%的控股股东、董事长兼总经理卢竑岩拟减持不超过2.7763%.
20230418	【七一二：公司近期正式组建了智能研究所】财联社4月18日电，七一二接受机构调研时表示，经过前期筹划，公司近期正式组建了智能研究所，专门从事大数据、人工智能、区块链等方向的研发，并与相关领域顶尖机构开展了包括研究中心共建、人才联合培养等高层次的产学研合作。基于训练系统领域的业务基础，目前已在航空大数据管理平台及业务应用等方向实现技术突破，尤其在人机联合效能评估方向已建立先发优势。在信息化基础上，加强军事智能核心技术的研发，向智能化融合发展。	09:09:19_x000D_ 【七一二：公司近期正式组建了智能研究所】财联社4月18日电，七一二接受机构调研时表示，经过前期筹划，公司近期正式组建了智能研究所，专门从事大数据、人工智能、区块链等方向的研发，并与相关领域顶尖机构开展了包括研究中心共建、人才联合培养等高层次的产学研合作。基于训练系统领域的业务基础，目前已在航空大数据管理平台及业务应用等方向实现技术突破，尤其在人机联合效能评估方向已建立先发优势。在信息化基础上，加强军事智能核心技术的研发，向智能化融合发展。
20230816	【野村上调中芯国际H股目标价至18.1港元 维持评级“中性”】财联社8月16日电，野村证券发表研报称，与中芯国际管理层交流后，认为公司对第三季经营前景略为正面，透露目前已见到中国主要IC设计公司的订单出现恢复及有计划逐步增加库存，从而为今年下半年及明年推出的新产品做准备。中芯管理层预测第三季收入将按季增长3%至5%，对应市场普遍预测增长5%，公司指引的18%至20%毛利率水平亦在野村预期之内。公司预计下半年价格压力将持续，野村则认为8英寸晶圆的价格较容易受到需求疲软等因素所影响，而且竞争情况亦较12英寸晶圆更为激烈，自2月起一直预计中芯的产品平均售价将自第二季开始下跌。野村将中芯国际目标价由17.8港元上调至18.1港元，维持“中性”评级不变。	15:01:15_x000D_ 【野村上调中芯国际H股目标价至18.1港元 维持评级“中性”】财联社8月16日电，野村证券发表研报称，与中芯国际管理层交流后，认为公司对第三季经营前景略为正面，透露目前已见到中国主要IC设计公司的订单出现恢复及有计划逐步增加库存，从而为今年下半年及明年推出的新产品做准备。中芯管理层预测第三季收入将按季增长3%至5%，对应市场普遍预测增长5%，公司指引的18%至20%毛利率水平亦在野村预期之内。公司预计下半年价格压力将持续，野村则认为8英寸晶圆的价格较容易受到需求疲软等因素所影响，而且竞争情况亦较12英寸晶圆更为激烈，自2月起一直预计中芯的产品平均售价将自第二季开始下跌。野村将中芯国际目标价由17.8港元上调至18.1港元，维持“中性”评级不变。
20230817	13:39 _x000D_ [[+_+]]_x000D_ 专享 专享_x000D_ 【盘中宝】推动优质资源向上市公司集中，军工行业资产整合步伐明显提速，未来几年资产重组上市有望迎来新一轮高潮，这家公司是国内唯一同时具备这类细分产品研发和制造	13:39 _x000D_ [[+_+]]_x000D_ 专享 专享_x000D_ 【盘中宝】推动优质资源向上市公司集中，军工行业资产整合步伐明显提速，未来几年资产重组上市有望迎来新一轮高潮，这家公司是国内唯一同时具备这类细分产品研发和制造能力的企业 解锁直达>>
20230817	【冠农股份：上半年净利润同比增长77.64%】财联社8月17日电，冠农股份披露半年报，上半年公司实现营业收入24.26亿元，同比增长49.83%；净利润4.67亿元，同比增长77.64%；基本每股收益0.6元。	18:21:38_x000D_ 【冠农股份：上半年净利润同比增长77.64%】财联社8月17日电，冠农股份披露半年报，上半年公司实现营业收入24.26亿元，同比增长49.83%；净利润4.67亿元，同比增长77.64%；基本每股收益0.6元。
20230217	【金诚信：签署约2.26亿元采矿业务合同】财联社2月17日电，金诚信公告，公司近日取得了经签字盖章的金川集团股份有限公司2023年-2025年采矿业务合同。据悉，三矿区2023年-2025年A标段采矿业务合同金额预估约1.36亿元；三矿区2023年-2025年B标段采矿业务合同金额预估约9010万元。	16:49_x000D_ 【金诚信：签署约2.26亿元采矿业务合同】财联社2月17日电，金诚信公告，公司近日取得了经签字盖章的金川集团股份有限公司2023年-2025年采矿业务合同。据悉，三矿区2023年-2025年A标段采矿业务合同金额预估约1.36亿元；三矿区2023年-2025年B标段采矿业务合同金额预估约9010万元。
20230602	【宣泰医药：公司产品普瑞巴林缓释片获得美国FDA批准文号】财联社6月2日电，宣泰医药公告，公司收到美国食品药品监督管理局（简称“美国FDA”）的通知，公司向美国FDA申报的普瑞巴林缓释片的新药简略申请（ANDA，即美国仿制药申请）已获得正式批准。	17:04:28_x000D_ 【宣泰医药：公司产品普瑞巴林缓释片获得美国FDA批准文号】财联社6月2日电，宣泰医药公告，公司收到美国食品药品监督管理局（简称“美国FDA”）的通知，公司向美国FDA申报的普瑞巴林缓释片的新药简略申请（ANDA，即美国仿制药申请）已获得正式批准。
20230613	【博俊科技：拟建设汽车零部件和模具生产基地项目】财联社6月13日电，博俊科技公告，拟在河北省三河市燕郊高新技术产业开发区建设汽车零部件和模具生产基地项目，项目总投资额拟为4亿元。	15:58:51_x000D_ 【博俊科技：拟建设汽车零部件和模具生产基地项目】财联社6月13日电，博俊科技公告，拟在河北省三河市燕郊高新技术产业开发区建设汽车零部件和模具生产基地项目，项目总投资额拟为4亿元。
20230616	【碧水源：股东拟减持不超过0.79%公司股份】财联社6月16日电，碧水源公告，持股8.52%的股东文剑平拟减持不超过0.79%公司股份。	17:57:10_x000D_ 【碧水源：股东拟减持不超过0.79%公司股份】财联社6月16日电，碧水源公告，持股8.52%的股东文剑平拟减持不超过0.79%公司股份。
20230627	【午评：沪指震荡反弹涨0.93% 房地产产业链个股集体走强】财联社6月27日电，市场早盘震荡反弹，三大指数涨跌不一，沪指偏强。盘面上，中船系个股大涨，中国动力、中船科技涨停。地产产业链个股集体走强，中南建设、中迪投资、好太太、哈尔斯等涨停。氢能源概念股震荡走高，京城股份、美锦能源、华电重工等多股涨停。AI概念股展开反弹，拓维信息、万达电影涨停。旅游等消费股开盘冲高，曲江文旅、长白山、西安旅游涨停。下跌方面，机器人概念股陷入调整，德恩精工、丰立智能等跌超5%。总体上个股涨多跌少，两市超4100只个股上涨。沪深两市今日成交额5177亿，较上个交易日缩量1171亿。板块方面，中船系、旅游、房地产、家用轻工等板块涨幅居前，仅电力和自动化设备两个板块下跌。截至上午收盘，沪指涨0.93%，深成指涨0.57%，创业板指跌0.05%。北向资金方面，沪股通早盘净流入2.65亿，深股通早盘净流出24.94亿。	11:32:51_x000D_ 【午评：沪指震荡反弹涨0.93% 房地产产业链个股集体走强】财联社6月27日电，市场早盘震荡反弹，三大指数涨跌不一，沪指偏强。盘面上，中船系个股大涨，中国动力、中船科技涨停。地产产业链个股集体走强，中南建设、中迪投资、好太太、哈尔斯等涨停。氢能源概念股震荡走高，京城股份、美锦能源、华电重工等多股涨停。AI概念股展开反弹，拓维信息、万达电影涨停。旅游等消费股开盘冲高，曲江文旅、长白山、西安旅游涨停。下跌方面，机器人概念股陷入调整，德恩精工、丰立智能等跌超5%。总体上个股涨多跌少，两市超4100只个股上涨。沪深两市今日成交额5177亿，较上个交易日缩量1171亿。板块方面，中船系、旅游、房地产、家用轻工等板块涨幅居前，仅电力和自动化设备两个板块下跌。截至上午收盘，沪指涨0.93%，深成指涨0.57%，创业板指跌0.05%。北向资金方面，沪股通早盘净流入2.65…
20230823	【有研硅：主要用于高压IGBT的8英寸区熔硅片已进入客户验证阶段】财联社8月23日电，有研硅近期在机构调研时表示，公司在今年上半年已成功研发出主要用于高压IGBT的8英寸区熔硅片，包含NTD和气掺产品，已进入客户验证阶段，预计下半年完成验证并于明年逐步释放产能。此外，全球6英寸硅片需求量是一定的，竞争将会非常激烈。公司未来不会增加新的6英寸硅片投入，将在现有产能基础上开展提质增效满足客户需求。	14:09:09_x000D_ 【有研硅：主要用于高压IGBT的8英寸区熔硅片已进入客户验证阶段】财联社8月23日电，有研硅近期在机构调研时表示，公司在今年上半年已成功研发出主要用于高压IGBT的8英寸区熔硅片，包含NTD和气掺产品，已进入客户验证阶段，预计下半年完成验证并于明年逐步释放产能。此外，全球6英寸硅片需求量是一定的，竞争将会非常激烈。公司未来不会增加新的6英寸硅片投入，将在现有产能基础上开展提质增效满足客户需求。
20230827	【赛诺医疗：HT Supreme支架完成美国FDA现场检查】财联社8月27日电，赛诺医疗公告，8月21日至24日期间，公司接受了美国食品药品监督管理局（FDA）关于高风险医疗器械（III 类）美国市场准入的现场检查，并以 VAI（自愿行动项）的结果顺利完成此次现场检查，标志着赛诺医疗HT Supreme支架在美国上市前批准（PMA）申请的道路上又迈出了坚实一步。	17:59:49_x000D_ 【赛诺医疗：HT Supreme支架完成美国FDA现场检查】财联社8月27日电，赛诺医疗公告，8月21日至24日期间，公司接受了美国食品药品监督管理局（FDA）关于高风险医疗器械（III 类）美国市场准入的现场检查，并以 VAI（自愿行动项）的结果顺利完成此次现场检查，标志着赛诺医疗HT Supreme支架在美国上市前批准（PMA）申请的道路上又迈出了坚实一步。
20230829	【华为发布Mate 60 Pro 为全球首款支持卫星通话的大众智能手机】财联社8月29日电，华为商城29日发布致华为用户的一封信，今天推出“HUAWEI Mate 60 Pro先锋计划”，在华为商城，12:08正式上线，让部分消费者提前体验史上最强大的Mate手机。华为在卫星通信领域再次突破，Mate 60 Pro成为全球首款支持卫星通话的大众智能手机，即使在没有地面网络信号的情况下，也可以从容拨打、接听卫星电话。AI隔空操控、智感支付、注视不屏等智慧功能，在Mate 60 Pro上全面回归。同时，接入盘古人工智能大模型，为消费者提供更智慧的交互体验。	12:58:44_x000D_ 【华为发布Mate 60 Pro 为全球首款支持卫星通话的大众智能手机】财联社8月29日电，华为商城29日发布致华为用户的一封信，今天推出“HUAWEI Mate 60 Pro先锋计划”，在华为商城，12:08正式上线，让部分消费者提前体验史上最强大的Mate手机。华为在卫星通信领域再次突破，Mate 60 Pro成为全球首款支持卫星通话的大众智能手机，即使在没有地面网络信号的情况下，也可以从容拨打、接听卫星电话。AI隔空操控、智感支付、注视不屏等智慧功能，在Mate 60 Pro上全面回归。同时，接入盘古人工智能大模型，为消费者提供更智慧的交互体验。
20230703	【韶能股份：控股子公司宏大公司生产的齿轮减速器用于工程机械】财联社7月3日电，韶能股份在互动平台表示，公司从事精密(智能)制造业务的控股子公司宏大公司，目前重点生产新能源重卡变速箱、电机轴、叉车后桥总成、乘用车零部件等新能源产品以及其他汽车零部件产品，其中生产的齿轮减速器用于工程机械。公司子公司华南精锻科技生产精密锻造件，不生产减速器。	11:32:37_x000D_ 【韶能股份：控股子公司宏大公司生产的齿轮减速器用于工程机械】财联社7月3日电，韶能股份在互动平台表示，公司从事精密(智能)制造业务的控股子公司宏大公司，目前重点生产新能源重卡变速箱、电机轴、叉车后桥总成、乘用车零部件等新能源产品以及其他汽车零部件产品，其中生产的齿轮减速器用于工程机械。公司子公司华南精锻科技生产精密锻造件，不生产减速器。
20230710	17:20 _x000D_ [[+_+]]_x000D_ 专享 专享_x000D_ 【风口研报·公司】机器人+储能+核电线缆未来增长可期，这家公司新能源车线缆由比亚迪贡献近1/3营收，光伏线缆处行业第一梯队；另有家公司配电+变电产品覆盖13	17:20 _x000D_ [[+_+]]_x000D_ 专享 专享_x000D_ 【风口研报·公司】机器人+储能+核电线缆未来增长可期，这家公司新能源车线缆由比亚迪贡献近1/3营收，光伏线缆处行业第一梯队；另有家公司配电+变电产品覆盖13200家客户，还迎省内10万个充电桩增量市场 解锁直达>>
20230711	【宏润建设：中标4.12亿元重大工程项目】财联社7月11日电，宏润建设公告，公司中标上海市轨道交通市域线崇明线工程土建19标段项目，工程中标价4.12亿元，占公司2022年度营业收入的4.73%。	17:35:56_x000D_ 【宏润建设：中标4.12亿元重大工程项目】财联社7月11日电，宏润建设公告，公司中标上海市轨道交通市域线崇明线工程土建19标段项目，工程中标价4.12亿元，占公司2022年度营业收入的4.73%。
20230712	【中广核技：公司董事长胡冬明辞职】财联社7月12日电，中广核技公告，因工作调整，胡冬明申请辞去董事长、董事、战略委员会主任委员职务。	18:13:01_x000D_ 【中广核技：公司董事长胡冬明辞职】财联社7月12日电，中广核技公告，因工作调整，胡冬明申请辞去董事长、董事、战略委员会主任委员职务。
20230720	【威士顿：公司并无转型为机器人设备厂商的规划】财联社7月20日电，威士顿披露关于股价异常波动的公告，在无序分拣机器人等智能设备类的应用研究中，公司利用自身的软件技术和自控技术，结合人工智能技术，探索智能大脑与第三方硬件设备的集成和联动，解决实际场景的问题。公司会致力此类应用场景探索，但该等业务和项目仍然在储备过程中，公司并无转型为机器人设备厂商的规划。	19:55:13_x000D_ 【威士顿：公司并无转型为机器人设备厂商的规划】财联社7月20日电，威士顿披露关于股价异常波动的公告，在无序分拣机器人等智能设备类的应用研究中，公司利用自身的软件技术和自控技术，结合人工智能技术，探索智能大脑与第三方硬件设备的集成和联动，解决实际场景的问题。公司会致力此类应用场景探索，但该等业务和项目仍然在储备过程中，公司并无转型为机器人设备厂商的规划。
20230501	【美国加州DFPI指定美国联邦存款保险公司作为第一共和银行的接管人】财联社5月1日电，美国加州金融保护和创新部门（DFPI）指定美国联邦存款保险公司作为第一共和银行的接管人，目前第一共和银行的总资产约为2291亿美元，联邦存款保险公司接受摩根大通对第一共和银行的收购要约。	15:26:12_x000D_ 【美国加州DFPI指定美国联邦存款保险公司作为第一共和银行的接管人】财联社5月1日电，美国加州金融保护和创新部门（DFPI）指定美国联邦存款保险公司作为第一共和银行的接管人，目前第一共和银行的总资产约为2291亿美元，联邦存款保险公司接受摩根大通对第一共和银行的收购要约。
20230504	【美迪凯：灵犀美迪凯有向苹果和META送样】财联社5月4日电，美迪凯在互动平台表示，灵犀美迪凯有向苹果和META送样，基于客户签订的保密协议和商业机密等方面要求，具体产品不便对外披露。	21:53:03_x000D_ 【美迪凯：灵犀美迪凯有向苹果和META送样】财联社5月4日电，美迪凯在互动平台表示，灵犀美迪凯有向苹果和META送样，基于客户签订的保密协议和商业机密等方面要求，具体产品不便对外披露。
20230514	【岱勒新材：目前是满产状态 交单任务相对比较紧】财联社5月14日电，岱勒新材在机构调研时表示，4月份公司基本是满产运行的，目前也是满产的状态，从当前客户的订单情况来看，总体上略超产能水平，所以公司目前的交单任务还是相对比较紧的。此外，公司表示，从光伏行业的发展来看，随着下游光伏企业的规模越来越大，其对金刚石线企业的要求重点主要集中在供应规模、切割表现、品质的持续稳定以及产品升级的能力这四个方面，切割表现好、品质好的产品在市面上还是会处于相对偏紧的状态。	21:31:03_x000D_ 【岱勒新材：目前是满产状态 交单任务相对比较紧】财联社5月14日电，岱勒新材在机构调研时表示，4月份公司基本是满产运行的，目前也是满产的状态，从当前客户的订单情况来看，总体上略超产能水平，所以公司目前的交单任务还是相对比较紧的。此外，公司表示，从光伏行业的发展来看，随着下游光伏企业的规模越来越大，其对金刚石线企业的要求重点主要集中在供应规模、切割表现、品质的持续稳定以及产品升级的能力这四个方面，切割表现好、品质好的产品在市面上还是会处于相对偏紧的状态。
20230522	【中粮糖业：糖价上涨对公司有正面影响 炼糖业务会有一些浮动】财联社5月22日电，今年以来，国内外糖价持续走高，当前国内期现货糖价均处在多年来的历史最高水平。今天，记者以投资者身份致电中粮糖业，工作人员表示公司以炼糖为主，根据原糖进口量来决定炼糖产能，今年糖价走高，公司炼糖产能会有一些浮动。另外自产糖这块没有太大的变化。 (第一财经)	14:24:47_x000D_ 【中粮糖业：糖价上涨对公司有正面影响 炼糖业务会有一些浮动】财联社5月22日电，今年以来，国内外糖价持续走高，当前国内期现货糖价均处在多年来的历史最高水平。今天，记者以投资者身份致电中粮糖业，工作人员表示公司以炼糖为主，根据原糖进口量来决定炼糖产能，今年糖价走高，公司炼糖产能会有一些浮动。另外自产糖这块没有太大的变化。 (第一财经)
20230728	【早间公告：开山股份印尼PT Sokoria地热公司第二期电站（3兆瓦）投入商业运营】财联社7月28日电，开山股份公告，公司2016年8月通过控股子公司新加坡KSORKA公司收购的PT Sokoria地热公司于7月27日得到能矿部电力总局的生产运行合格证。印尼国家电力公司东努萨登加拉省相关部门确认SGI地热电站于7月28日投入商业运营。前两期电站预计年电费收入约达800万美元。	08:26:13_x000D_ 【早间公告：开山股份印尼PT Sokoria地热公司第二期电站（3兆瓦）投入商业运营】财联社7月28日电，开山股份公告，公司2016年8月通过控股子公司新加坡KSORKA公司收购的PT Sokoria地热公司于7月27日得到能矿部电力总局的生产运行合格证。印尼国家电力公司东努萨登加拉省相关部门确认SGI地热电站于7月28日投入商业运营。前两期电站预计年电费收入约达800万美元。
20230801	【浙江荣泰登陆上交所 成为特斯拉、宝马等知名汽车厂商一级供应商】财联社8月1日电，耐高温绝缘云母制品制造企业浙江荣泰今日在上交所上市，股票代码603119，公司股票发行价格为15.32元。目前，公司为特斯拉、大众、宝马等知名汽车厂商的一级供应商，与宁德时代建立稳定的业务合作关系，并且知名家电企业美的、松下等亦为公司客户。数据显示，2022年公司云母耐火绝缘整体市占率为4.35%，其中在新能源汽车和家用电器云母应用市场占有率分别为27.14%和19.75%。2020年至2022年，浙江荣泰营业收入增长呈较快上升趋势，由3.65亿元增长至6.67亿元，盈利能力显著提升，归母净利润由2917.59万元增长至1.34亿元。	09:00:14_x000D_ 【浙江荣泰登陆上交所 成为特斯拉、宝马等知名汽车厂商一级供应商】财联社8月1日电，耐高温绝缘云母制品制造企业浙江荣泰今日在上交所上市，股票代码603119，公司股票发行价格为15.32元。目前，公司为特斯拉、大众、宝马等知名汽车厂商的一级供应商，与宁德时代建立稳定的业务合作关系，并且知名家电企业美的、松下等亦为公司客户。数据显示，2022年公司云母耐火绝缘整体市占率为4.35%，其中在新能源汽车和家用电器云母应用市场占有率分别为27.14%和19.75%。2020年至2022年，浙江荣泰营业收入增长呈较快上升趋势，由3.65亿元增长至6.67亿元，盈利能力显著提升，归母净利润由2917.59万元增长至1.34亿元。
20230806	19:00 _x000D_ [[+_+]]_x000D_ 专享 专享_x000D_ 【财联社早知道】美股光模块公司单日大涨67.07%，这家公司此前拟参与收购其中国资产及相关业务；五大巨头组建RISC-V芯片公司，机构称到2025年市场将消	19:00 _x000D_ [[+_+]]_x000D_ 专享 专享_x000D_ 【财联社早知道】美股光模块公司单日大涨67.07%，这家公司此前拟参与收购其中国资产及相关业务；五大巨头组建RISC-V芯片公司，机构称到2025年市场将消耗624亿个RISC-V CPU核 解锁直达>>
20230611	【益生股份：5月白羽肉鸡苗销售收入同比增长58.85%】财联社6月11日电，益生股份公告，公司2023年5月白羽肉鸡苗销售数量6212.61万只，销售收入2.39亿元，同比变动分别为15.96%、58.85%，环比变动分别为14.01%、-29.41%。益生股份表示，白羽肉鸡行业景气度高，2023年5月公司白羽肉鸡苗销售价格同比上涨。	16:52:26_x000D_ 【益生股份：5月白羽肉鸡苗销售收入同比增长58.85%】财联社6月11日电，益生股份公告，公司2023年5月白羽肉鸡苗销售数量6212.61万只，销售收入2.39亿元，同比变动分别为15.96%、58.85%，环比变动分别为14.01%、-29.41%。益生股份表示，白羽肉鸡行业景气度高，2023年5月公司白羽肉鸡苗销售价格同比上涨。
20230616	【中科院：自主研制新一代人工智能大模型问世】财联社6月16日电，中国科学院自动化研究所今天上午在上海发布了该所研制的新一代人工智能大模型——紫东太初2.0。全新大模型相比第一代着力提升了决策与判断能力，实现了从感知、认知到决策的跨越，未来将在医疗、交通、工业生产等领域发挥更大作用。作为我国首个存储千亿参数的图文音三模态大模型，第一代紫东太初人工智能大模型在2021年问世时实现了无标识的图像、文字、语音的识别能力，这次发布的新一代大模型则升级融入了视频、传感信号、3D点云等识别能力，突破了多模态分组认知编码、解码，全模态认知等关键技术，提升了系统的决策和判断能力，打通了系统识别能力从感知、认知到决策的通路，从而拓展出更为广泛的应用场景。目前，紫东太初大模型已经在神经外科手术导航、短视频内容审核、医疗多模态鉴别诊断、交通违规图像研读等多领域应用。	11:06:00_x000D_ 【中科院：自主研制新一代人工智能大模型问世】财联社6月16日电，中国科学院自动化研究所今天上午在上海发布了该所研制的新一代人工智能大模型——紫东太初2.0。全新大模型相比第一代着力提升了决策与判断能力，实现了从感知、认知到决策的跨越，未来将在医疗、交通、工业生产等领域发挥更大作用。作为我国首个存储千亿参数的图文音三模态大模型，第一代紫东太初人工智能大模型在2021年问世时实现了无标识的图像、文字、语音的识别能力，这次发布的新一代大模型则升级融入了视频、传感信号、3D点云等识别能力，突破了多模态分组认知编码、解码，全模态认知等关键技术，提升了系统的决策和判断能力，打通了系统识别能力从感知、认知到决策的通路，从而拓展出更为广泛的应用场景。目前，紫东太初大模型已经在神经外科手术导航、短视频内容审核、医疗多模态鉴别诊断、交通违规图像研读等多领域应用。
20230621	【意华股份：800G光模块产品正处于开发、设计方案阶段】财联社6月21日电，意华股份在互动平台表示，公司主要光模块产品主要集中于100-400gG产品，800G光模块产品正处于开发、设计方案阶段。	18:34:04_x000D_ 【意华股份：800G光模块产品正处于开发、设计方案阶段】财联社6月21日电，意华股份在互动平台表示，公司主要光模块产品主要集中于100-400gG产品，800G光模块产品正处于开发、设计方案阶段。
20230629	【万华化学：自7月份开始 中国地区聚合MDI挂牌价18800元/吨】财联社6月29日电，万华化学公告，自7月份开始，中国地区聚合MDI挂牌价18800元/吨（同6月份相比没有变动）；纯MDI挂牌价23300元/吨（同6月份相比没有变动）。	17:45:26_x000D_ 【万华化学：自7月份开始 中国地区聚合MDI挂牌价18800元/吨】财联社6月29日电，万华化学公告，自7月份开始，中国地区聚合MDI挂牌价18800元/吨（同6月份相比没有变动）；纯MDI挂牌价23300元/吨（同6月份相比没有变动）。
20230630	【春秋航空：暑运计划执行超3万个航班 较2019年增超两成】财联社6月30日电，财联社记者今日从春秋航空处获悉，今年暑运期间将计划执行超3万个航班，预计承运旅客约500万人次，两项数据均较2019年增长超过两成。据春秋航空相关负责人介绍，今年部分避暑航线备受青睐，部分日期的火热程度已超越传统旅游航线，如上海至威海航线7月1日的票价已经攀升至全价票。（财联社记者 胡皓琼）	16:33:46_x000D_ 【春秋航空：暑运计划执行超3万个航班 较2019年增超两成】财联社6月30日电，财联社记者今日从春秋航空处获悉，今年暑运期间将计划执行超3万个航班，预计承运旅客约500万人次，两项数据均较2019年增长超过两成。据春秋航空相关负责人介绍，今年部分避暑航线备受青睐，部分日期的火热程度已超越传统旅游航线，如上海至威海航线7月1日的票价已经攀升至全价票。（财联社记者 胡皓琼）
20230630	【午间公告：烽火电子拟购买长岭科技98.395%股权】财联社6月30日电，多家公司发布午间公告，具体如下：①烽火电子：公司正筹划发行股份及支付现金购买陕西长岭电子科技有限责任公司（简称“长岭科技”）98.395%的股权，并募集配套资金，公司股票已自6月30日开市起停牌。②凯盛新材：向不特定对象发行可转债申请获得深交所上市委审议通过。③江苏神通：控股股东聚源瑞利6月29日通过集中竞价方式增持公司股份10万股，占公司总股本的0.0197%，增持承诺已完成。④昌红科技：向特定对象发行股票申请获得中国证监会注册批复。⑤亚华电子：公司拟使用部分超募资金1.34亿元用于永久补充流动资金和偿还银行贷款。	12:05:57_x000D_ 【午间公告：烽火电子拟购买长岭科技98.395%股权】财联社6月30日电，多家公司发布午间公告，具体如下：_x000D_ _x000D_ ①烽火电子：公司正筹划发行股份及支付现金购买陕西长岭电子科技有限责任公司（简称“长岭科技”）98.395%的股权，并募集配套资金，公司股票已自6月30日开市起停牌。_x000D_ _x000D_ ②凯盛新材：向不特定对象发行可转债申请获得深交所上市委审议通过。_x000D_ _x000D_ ③江苏神通：控股股东聚源瑞利6月29日通过集中竞价方式增持公司股份10万股，占公司总股本的0.0197%，增持承诺已完成。_x000D_ _x000D_ ④昌红科技：向特定对象发行股票申请获得中国证监会注册批复。_x000D_ _x000D_ ⑤亚华电子：公司拟使用部分超募资金1.34亿元用于永久补充流动资金和偿还银行贷款。
20230412	【呼吁暂停AI开发的马斯克被曝买了1万块GPU筹备项目】财联社4月12日电，据Business Insider当地时间4月11日报道，马斯克最近购买了约1万个GPU，用于推特的两个数据中心之一。该项目涉及创建一个生成式人工智能，推特将根据自己的海量数据进行训练。目前还不清楚推特将如何利用这项技术，但生成式人工智能可以增强推特的搜索功能或帮助重建其广告业务。最近，马斯克带头签署了一封呼吁暂停人工智能开发6个月的公开信。	08:57:52_x000D_ 【呼吁暂停AI开发的马斯克被曝买了1万块GPU筹备项目】财联社4月12日电，据Business Insider当地时间4月11日报道，马斯克最近购买了约1万个GPU，用于推特的两个数据中心之一。该项目涉及创建一个生成式人工智能，推特将根据自己的海量数据进行训练。目前还不清楚推特将如何利用这项技术，但生成式人工智能可以增强推特的搜索功能或帮助重建其广告业务。最近，马斯克带头签署了一封呼吁暂停人工智能开发6个月的公开信。
20230414	【上海钢联：公司目前基于“小模型”开发应用产品 具备初步AIGC的能力】财联社4月14日电，上海钢联接受机构调研时表示，公司始终关注用户获取、使用数据的便利性，资讯网站、APP和“钢联数据”终端产品中利用知识图谱、NLP和深度学习等 AI 技术，提供强大的搜索和推荐功能，让用户更为高效地工作。此外，公司目前基于“小模型”开发应用产品，也尝试基于开源的大语言模型和第三方服务，目前具备初步AIGC的能力，实现资讯内容的自动生成或辅助生成，低成本提高公司的内容生产力，并提高编辑人员的工作效率。	22:09:12_x000D_ 【上海钢联：公司目前基于“小模型”开发应用产品 具备初步AIGC的能力】财联社4月14日电，上海钢联接受机构调研时表示，公司始终关注用户获取、使用数据的便利性，资讯网站、APP和“钢联数据”终端产品中利用知识图谱、NLP和深度学习等 AI 技术，提供强大的搜索和推荐功能，让用户更为高效地工作。此外，公司目前基于“小模型”开发应用产品，也尝试基于开源的大语言模型和第三方服务，目前具备初步AIGC的能力，实现资讯内容的自动生成或辅助生成，低成本提高公司的内容生产力，并提高编辑人员的工作效率。
20230423	【神工股份：拟定增募资不超3亿元】财联社4月23日电，神工股份公告，公司拟以简易程序向特定对象发行股票募资不超过3亿元，用于集成电路刻蚀设备用硅材料扩产项目、补充流动资金。	17:36:09_x000D_ 【神工股份：拟定增募资不超3亿元】财联社4月23日电，神工股份公告，公司拟以简易程序向特定对象发行股票募资不超过3亿元，用于集成电路刻蚀设备用硅材料扩产项目、补充流动资金。
20230113	【康恩贝：2022年净利同比预降80%-84%】康恩贝公告，预计2022年实现营收60亿元；归母净利润3.3亿元至4亿元，同比下降80.09%至83.58%；预计扣非净利润4.75亿元至5.25亿元，同比增长200.26%至231.87%。报告期内，公司在大品牌大品种培育上获得突破性成果，肠炎宁系列产品年销售收入首次超10亿元。经过近几年对低效、无效资产的加快处置以及充分计提资产减值准备，公司已基本消化了历年来的不利因素。	17:37_x000D_ 【康恩贝：2022年净利同比预降80%-84%】康恩贝公告，预计2022年实现营收60亿元；归母净利润3.3亿元至4亿元，同比下降80.09%至83.58%；预计扣非净利润4.75亿元至5.25亿元，同比增长200.26%至231.87%。报告期内，公司在大品牌大品种培育上获得突破性成果，肠炎宁系列产品年销售收入首次超10亿元。经过近几年对低效、无效资产的加快处置以及充分计提资产减值准备，公司已基本消化了历年来的不利因素。
20230214	【东湖高新：子公司牵头联合体中标29.6亿元工程项目】财联社2月14日电，东湖高新公告，全资子公司湖北路桥作为联合体牵头方，与安徽路港组成的联合体中标苍溪县交通运输局省道411线广元市苍溪至旺苍段公路建设工程县城至歧坪段PPP项目（第二次）。项目估算总投资29.6亿元。	16:44_x000D_ 【东湖高新：子公司牵头联合体中标29.6亿元工程项目】财联社2月14日电，东湖高新公告，全资子公司湖北路桥作为联合体牵头方，与安徽路港组成的联合体中标苍溪县交通运输局省道411线广元市苍溪至旺苍段公路建设工程县城至歧坪段PPP项目（第二次）。项目估算总投资29.6亿元。
20230216	【建发房产与南宁部分银行合作将房贷延至100岁？置业顾问回应：为接力贷产品 目前已可操作】财联社2月16日电，建发房产发布的一则海报信息显示，建发房产与南宁部分银行合作，购房者购买建发南宁相关楼盘，住房按揭贷款年龄加贷款期限可放宽，子女作为共同借款人最长可贷至100岁。对此，建发房产南宁旗下楼盘置业顾问告诉记者，近期的确与合作银行推出可贷至100岁的接力贷产品，目前已可以操作，具体贷款政策以银行输出为准。（财联社记者 王海春）	10:49_x000D_ 【建发房产与南宁部分银行合作将房贷延至100岁？置业顾问回应：为接力贷产品 目前已可操作】财联社2月16日电，建发房产发布的一则海报信息显示，建发房产与南宁部分银行合作，购房者购买建发南宁相关楼盘，住房按揭贷款年龄加贷款期限可放宽，子女作为共同借款人最长可贷至100岁。对此，建发房产南宁旗下楼盘置业顾问告诉记者，近期的确与合作银行推出可贷至100岁的接力贷产品，目前已可以操作，具体贷款政策以银行输出为准。（财联社记者 王海春）
20230502	【陈杭：离职是想更好地拿起法律武器保护自身合法权利 对不实信息已经报警】财联社5月2日电，针对有关事件，原浙商证券研究所所长助理陈杭表示“本人第一时间对谭珺的不实信息已经报警，警方正在收集证据，积极处理中。”陈杭还表示：“第一，谭珺所述自己炒股亏钱，系自己行为，因为知晓谭珺是证券从业人员不能买卖股票，怎么可能给她推股票？她所述的所有内容都是对我的侮辱诽谤。第二，从浙商证券离职是想更好地拿起法律武器保护自身的合法权利，因为谭珺的行为已经涉嫌违法，本人已经报警。在职身份要求我的一举一动都要向合规汇报备案，不利于事件的快速处理，所以为了避免前雇主被无辜波及，故主动提出离职，专心处理此事。第三，谭珺近期对我的大面积抹黑和不实信息，已经诉诸于法律武器，相信法律会给一个公道。由于谭珺一直通过媒体抹黑方式来制造舆论，希望各位媒体朋友报道要讲究证据，不能捕风捉影，被坏人带节奏，被利用当枪使。” (中证报)	14:02:15_x000D_ 【陈杭：离职是想更好地拿起法律武器保护自身合法权利 对不实信息已经报警】财联社5月2日电，针对有关事件，原浙商证券研究所所长助理陈杭表示“本人第一时间对谭珺的不实信息已经报警，警方正在收集证据，积极处理中。”陈杭还表示：“第一，谭珺所述自己炒股亏钱，系自己行为，因为知晓谭珺是证券从业人员不能买卖股票，怎么可能给她推股票？她所述的所有内容都是对我的侮辱诽谤。第二，从浙商证券离职是想更好地拿起法律武器保护自身的合法权利，因为谭珺的行为已经涉嫌违法，本人已经报警。在职身份要求我的一举一动都要向合规汇报备案，不利于事件的快速处理，所以为了避免前雇主被无辜波及，故主动提出离职，专心处理此事。第三，谭珺近期对我的大面积抹黑和不实信息，已经诉诸于法律武器，相信法律会给一个公道。由于谭珺一直通过媒体抹黑方式来制造舆论，希望各位媒体朋友报道要讲究证据，不能捕风捉影，被坏人带…
20230201	07:15 _x000D_ [[+_+]]_x000D_ 专享 专享_x000D_ 【研选·晨会精选】公司业绩大超预期，净利润超百亿元！当前估值仅5倍PE、近8%股息率，控股股东拟增持2.5-5亿元（不限价），仅股息率已具备较大投资吸引力	07:15 _x000D_ [[+_+]]_x000D_ 专享 专享_x000D_ 【研选·晨会精选】公司业绩大超预期，净利润超百亿元！当前估值仅5倍PE、近8%股息率，控股股东拟增持2.5-5亿元（不限价），仅股息率已具备较大投资吸引力 解锁直达>>
20230702	【永泰能源：核心管理人员拟第四次增持公司股票】财联社7月2日电，永泰能源公告，公司核心管理人员拟第四次增持公司股票，增持数量1200万股-1400万股。	15:40:46_x000D_ 【永泰能源：核心管理人员拟第四次增持公司股票】财联社7月2日电，永泰能源公告，公司核心管理人员拟第四次增持公司股票，增持数量1200万股-1400万股。
20230703	【7月3日午间涨停分析】今日午盘两市共36股涨停，连板股总数8只，12股封板未遂，封板率为75%（不含ST股、退市股及未开板新股）。个股方面，减速器概念股襄阳轴承4板、圣龙股份2板，复合集流体板块英联股份6天4板、宝明科技2板，机器人+摘帽的林州重机4天3板，智能驾驶概念股浙江世宝2板。	12:01:27_x000D_ 【7月3日午间涨停分析】今日午盘两市共36股涨停，连板股总数8只，12股封板未遂，封板率为75%（不含ST股、退市股及未开板新股）。个股方面，减速器概念股襄阳轴承4板、圣龙股份2板，复合集流体板块英联股份6天4板、宝明科技2板，机器人+摘帽的林州重机4天3板，智能驾驶概念股浙江世宝2板。
20230711	18:26 _x000D_ [[+_+]]_x000D_ 专享 专享_x000D_ 【机构龙虎榜解读】无人驾驶+机器人+英伟达，旗下系列产品支持英伟达人工智能平台，率先推出车规级产品并获得主流主机厂定点，机构净买入这家企业 解锁直达>>	18:26 _x000D_ [[+_+]]_x000D_ 专享 专享_x000D_ 【机构龙虎榜解读】无人驾驶+机器人+英伟达，旗下系列产品支持英伟达人工智能平台，率先推出车规级产品并获得主流主机厂定点，机构净买入这家企业 解锁直达>>
20230713	【国际医学：预计上半年净亏损1.95亿元至2.25亿元】财联社7月13日电，国际医学公告，预计2023年半年度净利亏损1.95亿元至2.25亿元，上年同期为亏损5.96亿元。报告期内，前期影响公司医疗业务发展的不利因素逐渐消除，公司新建院区投用和新业务开展，带动业务规模快速提升；公司已建成的整体医疗床位使用量处于平稳提升阶段，毛利率水平正逐步改善，但营收规模尚未能覆盖运营成本及期间费用。	18:41:37_x000D_ 【国际医学：预计上半年净亏损1.95亿元至2.25亿元】财联社7月13日电，国际医学公告，预计2023年半年度净利亏损1.95亿元至2.25亿元，上年同期为亏损5.96亿元。报告期内，前期影响公司医疗业务发展的不利因素逐渐消除，公司新建院区投用和新业务开展，带动业务规模快速提升；公司已建成的整体医疗床位使用量处于平稳提升阶段，毛利率水平正逐步改善，但营收规模尚未能覆盖运营成本及期间费用。
20230823	【冠盛股份：目前新能源整车配套业务占比极小】财联社8月23日电，冠盛股份发布股价异动公告，公司主要收入来源以汽车售后市场零部件为主，目前新能源整车配套业务占比极小，公司的收入结构在短期内不会发生较大变化。	16:32:50_x000D_ 【冠盛股份：目前新能源整车配套业务占比极小】财联社8月23日电，冠盛股份发布股价异动公告，公司主要收入来源以汽车售后市场零部件为主，目前新能源整车配套业务占比极小，公司的收入结构在短期内不会发生较大变化。
20230824	【俄媒：普里戈任的手机在坠机现场一具尸体旁被发现】财联社8月24日电，俄罗斯《生意人报》报道称，卡塔尔半岛电视台援引瓦格纳消息人士的话称，瓦格纳创始人普里戈任的手机在坠机现场的一具尸体旁边被发现。不过，普里戈任的尸体尚未得到确认。 (环球网)	08:32:21_x000D_ 【俄媒：普里戈任的手机在坠机现场一具尸体旁被发现】财联社8月24日电，俄罗斯《生意人报》报道称，卡塔尔半岛电视台援引瓦格纳消息人士的话称，瓦格纳创始人普里戈任的手机在坠机现场的一具尸体旁边被发现。不过，普里戈任的尸体尚未得到确认。 (环球网)
20230829	【恩捷股份：子公司签订产能锁定协议】财联社8月29日电，恩捷股份公告，控股子公司上海恩捷与全球某知名大型锂电池生产商签订《产能锁定协议》，上海恩捷的匈牙利工厂2025-2033年向其供应不少于9.6亿平方米的锂电池隔膜材料，以采购订单约定为准。	18:56:32_x000D_ 【恩捷股份：子公司签订产能锁定协议】财联社8月29日电，恩捷股份公告，控股子公司上海恩捷与全球某知名大型锂电池生产商签订《产能锁定协议》，上海恩捷的匈牙利工厂2025-2033年向其供应不少于9.6亿平方米的锂电池隔膜材料，以采购订单约定为准。
20230905	【慕思股份：拟以1.2亿元-2.4亿元回购股份】财联社9月5日电，慕思股份公告，拟以1.2亿元-2.4亿元回购股份，回购价格不超过人民币40元/股。	19:13:58_x000D_ 【慕思股份：拟以1.2亿元-2.4亿元回购股份】财联社9月5日电，慕思股份公告，拟以1.2亿元-2.4亿元回购股份，回购价格不超过人民币40元/股。
20230905	【生物股份：全资子公司布鲁氏菌病活疫苗（Rev.1株）获《新兽药注册证书》】财联社9月5日电，生物股份公告，全资子公司金宇保灵自主开发的布鲁氏菌病活疫苗（Rev.1株）获得了《新兽药注册证书》。公司为全国首次独家引进“世界动物卫生组（OIE）”标准菌株，填补了国内该类疫苗产品空白。	16:42:35_x000D_ 【生物股份：全资子公司布鲁氏菌病活疫苗（Rev.1株）获《新兽药注册证书》】财联社9月5日电，生物股份公告，全资子公司金宇保灵自主开发的布鲁氏菌病活疫苗（Rev.1株）获得了《新兽药注册证书》。公司为全国首次独家引进“世界动物卫生组（OIE）”标准菌株，填补了国内该类疫苗产品空白。
20230730	【*ST紫鑫：公司股票将于8月4日被深交所摘牌】财联社7月30日电，*ST紫鑫公告，公司股票已被深交所决定终止上市，将于2023年8月4日被深交所摘牌。	16:07:00_x000D_ 【*ST紫鑫：公司股票将于8月4日被深交所摘牌】财联社7月30日电，*ST紫鑫公告，公司股票已被深交所决定终止上市，将于2023年8月4日被深交所摘牌。
20230801	【复星医药：控股子公司奥沙西泮片药品注册申请获受理】财联社8月1日电，复星医药公告，控股子公司湖南洞庭药业股份有限公司自主研发的奥沙西泮片的药品注册申请于近日获国家药品监督管理局受理。该药品拟用于短期缓解焦虑、紧张，激动，也可用于催眠，焦虑伴有精神抑郁的辅助用药，并能缓解急性酒精戒断症状。	16:36:42_x000D_ 【复星医药：控股子公司奥沙西泮片药品注册申请获受理】财联社8月1日电，复星医药公告，控股子公司湖南洞庭药业股份有限公司自主研发的奥沙西泮片的药品注册申请于近日获国家药品监督管理局受理。该药品拟用于短期缓解焦虑、紧张，激动，也可用于催眠，焦虑伴有精神抑郁的辅助用药，并能缓解急性酒精戒断症状。
20230815	【华大基因：将重点布局AI技术在多学大数据与合成业务的应用】财联社8月15日电，华大基因近日在接受调研时表示，今年上半年公司进一步加大研发投入，除了在生育健康、肿瘤防控和重大传感染疾病防控等核心业务领域外，也加大在慢性疾病领域的研发投入；同时公司也将持续加强基础能力建设，如提升中心实验室规模集成化、自动化和信息化水平。公司秉承“防大于治”发展理念，成立了智惠医学研究院体系，加大了对立体多组学、多维度的疾病防控整体解决方案的研发投入。在未来技术变革趋势方面，公司也重点布局AI技术在多学大数据与合成业务的应用，持续投入研发单分子测序技术和时空组学技术等新技术在临床中的应用。	14:30:27_x000D_ 【华大基因：将重点布局AI技术在多学大数据与合成业务的应用】财联社8月15日电，华大基因近日在接受调研时表示，今年上半年公司进一步加大研发投入，除了在生育健康、肿瘤防控和重大传感染疾病防控等核心业务领域外，也加大在慢性疾病领域的研发投入；同时公司也将持续加强基础能力建设，如提升中心实验室规模集成化、自动化和信息化水平。公司秉承“防大于治”发展理念，成立了智惠医学研究院体系，加大了对立体多组学、多维度的疾病防控整体解决方案的研发投入。在未来技术变革趋势方面，公司也重点布局AI技术在多学大数据与合成业务的应用，持续投入研发单分子测序技术和时空组学技术等新技术在临床中的应用。
20230420	【宝丰能源：拟定增募资不超过100亿元】财联社4月20日电，宝丰能源公告，拟定增募资不超过100亿元，用于全资子公司内蒙宝丰投资建设260万吨/年煤制烯烃和配套40万吨/年植入绿氢耦合制烯烃项目（一期）。	18:48:33_x000D_ 【宝丰能源：拟定增募资不超过100亿元】财联社4月20日电，宝丰能源公告，拟定增募资不超过100亿元，用于全资子公司内蒙宝丰投资建设260万吨/年煤制烯烃和配套40万吨/年植入绿氢耦合制烯烃项目（一期）。
20230110	【金城医药：预计2022年净利润同比增长150%-196%】财联社1月10日电，金城医药公告，预计2022年归母净利润为2.7亿元至3.2亿元，同比增长150.04%-196.34%。报告期内，公司医药中间体、CMO/CDMO业务及生物特色原料药销售收入同比实现增长。	15:48_x000D_ 【金城医药：预计2022年净利润同比增长150%-196%】财联社1月10日电，金城医药公告，预计2022年归母净利润为2.7亿元至3.2亿元，同比增长150.04%-196.34%。报告期内，公司医药中间体、CMO/CDMO业务及生物特色原料药销售收入同比实现增长。
20230425	【中国广核：一季度净利润同比增长22%】财联社4月25日电，中国广核披露2023年一季报，报告期内实现营业收入182.89亿元，同比增长6.47%；归母净利润34.86亿元，同比增长22.25%。	18:33:09_x000D_ 【中国广核：一季度净利润同比增长22%】财联社4月25日电，中国广核披露2023年一季报，报告期内实现营业收入182.89亿元，同比增长6.47%；归母净利润34.86亿元，同比增长22.25%。
20230427	【宁波港：去年及今年一季度空箱吞吐量占约30% 二、三季度为港口传统旺季】财联社4月27日电，今日举行的宁波港2022年度业绩说明会上，宁波港董事、副总经理石焕挺表示，公司2022年及今年一季度集装箱吞吐量中空箱占比约为30%。干散货方面，公司董秘蒋伟告诉财联社记者，宁波港今年一季度公司干散货的装卸量总体保持稳定状态，铁矿石、矿建材料等的接卸量已经超过时间进度要求，煤炭稍微滞后时间进度要求，集装箱装卸总体保持稳定发展态势。二、三季度是港口生产的传统旺季，有望继续保持平稳增长状态。（财联社记者 胡皓琼）	11:54:14_x000D_ 【宁波港：去年及今年一季度空箱吞吐量占约30% 二、三季度为港口传统旺季】财联社4月27日电，今日举行的宁波港2022年度业绩说明会上，宁波港董事、副总经理石焕挺表示，公司2022年及今年一季度集装箱吞吐量中空箱占比约为30%。干散货方面，公司董秘蒋伟告诉财联社记者，宁波港今年一季度公司干散货的装卸量总体保持稳定状态，铁矿石、矿建材料等的接卸量已经超过时间进度要求，煤炭稍微滞后时间进度要求，集装箱装卸总体保持稳定发展态势。二、三季度是港口生产的传统旺季，有望继续保持平稳增长状态。（财联社记者 胡皓琼）
20230829	【中信博：上半年净利约9808.08万元 同比扭亏】《科创板日报》29日讯，中信博发布半年报，上半年实现营业收入约19.21亿元，同比增长33.72%；净利润约9808.08万元，去年同期亏损约119.33万元，同比扭亏；基本每股收益0.72元。报告期内，光伏集中式地面电站市场新增装机需求旺盛。中信博同时公告，拟以自有资金5000万元至1.5亿元回购公司股份用于员工持股计划或者股权激励，回购价格不超过100元/股。	17:41:51_x000D_ 【中信博：上半年净利约9808.08万元 同比扭亏】《科创板日报》29日讯，中信博发布半年报，上半年实现营业收入约19.21亿元，同比增长33.72%；净利润约9808.08万元，去年同期亏损约119.33万元，同比扭亏；基本每股收益0.72元。报告期内，光伏集中式地面电站市场新增装机需求旺盛。中信博同时公告，拟以自有资金5000万元至1.5亿元回购公司股份用于员工持股计划或者股权激励，回购价格不超过100元/股。
20230830	【首旅酒店：控股子公司重签门票分成协议】财联社8月30日电，首旅酒店公告，近日，公司控股子公司南山公司与南山普门公司，完成了附生效条件的《南山文化旅游区门票收入分成协议》的重新签署。协议生效日起，双方继续以门票收入分成基数为基础，南山公司享有门票分成基数的50%，南山普门公司享有门票分成基数的50%。本次重新签署南山文化旅游区门票收入分成协议，是因协议对方主体更名、园区内部分资产所有权无偿移交、区域内称谓调整等原因，根据协议对方主体提议所做相关调整和修改，并重新签署。协议主要条款（包括门票收入的界定、费用扣除、分成比例、分成期限、结算支付方式等）仍与《原门票收入分成协议》一致，不会对南山公司经营收入等产生任何不利影响。	16:33:25_x000D_ 【首旅酒店：控股子公司重签门票分成协议】财联社8月30日电，首旅酒店公告，近日，公司控股子公司南山公司与南山普门公司，完成了附生效条件的《南山文化旅游区门票收入分成协议》的重新签署。协议生效日起，双方继续以门票收入分成基数为基础，南山公司享有门票分成基数的50%，南山普门公司享有门票分成基数的50%。本次重新签署南山文化旅游区门票收入分成协议，是因协议对方主体更名、园区内部分资产所有权无偿移交、区域内称谓调整等原因，根据协议对方主体提议所做相关调整和修改，并重新签署。协议主要条款（包括门票收入的界定、费用扣除、分成比例、分成期限、结算支付方式等）仍与《原门票收入分成协议》一致，不会对南山公司经营收入等产生任何不利影响。
20230420	【收评：沪指探底回升微跌 AI应用、算力方向再度大涨】财联社4月20日电，大盘全天震荡调整，沪指相对偏强，创业板指跌超1%。盘面上，AI概念股继续全线走强，其中CPO方向维持强势，剑桥科技3连板，华工科技涨停；应用端集体反弹，万兴科技、蓝色光标20CM，掌阅科技、中国科传、视觉中国、慈文传媒等多股涨停；算力方向震荡走高，寒武纪20CM涨停，同方股份涨停，中科曙光涨停创历史新高；半导体板块震荡拉升，存储芯片、设备等方向领涨，佰维存储涨停，沪电股份涨停，北方华创涨超7%。6G概念股开盘大涨，信科移动20CM涨停，本川智能涨超10%。下跌方面，赛道股陷入调整，锂电、光伏方向领跌，天奈科技跌超10%，隆基绿能、宁德时代跌超3%。总体上个股跌多涨少，两市超3300只个股下跌。沪深两市今日成交额11387亿，较上个交易日放量561亿。板块方面，CPO、手机游戏、传媒、算力等板块涨幅居前，旅游、盐湖提…	15:03:10_x000D_ 【收评：沪指探底回升微跌 AI应用、算力方向再度大涨】财联社4月20日电，大盘全天震荡调整，沪指相对偏强，创业板指跌超1%。盘面上，AI概念股继续全线走强，其中CPO方向维持强势，剑桥科技3连板，华工科技涨停；应用端集体反弹，万兴科技、蓝色光标20CM，掌阅科技、中国科传、视觉中国、慈文传媒等多股涨停；算力方向震荡走高，寒武纪20CM涨停，同方股份涨停，中科曙光涨停创历史新高；半导体板块震荡拉升，存储芯片、设备等方向领涨，佰维存储涨停，沪电股份涨停，北方华创涨超7%。6G概念股开盘大涨，信科移动20CM涨停，本川智能涨超10%。下跌方面，赛道股陷入调整，锂电、光伏方向领跌，天奈科技跌超10%，隆基绿能、宁德时代跌超3%。总体上个股跌多涨少，两市超3300只个股下跌。沪深两市今日成交额11387亿，较上个交易日放量561亿。板块方面，CPO、手机游戏、传媒、…
20230728	【拉卡拉：2023年上半年净利润同比增长54.69%】财联社7月28日电，拉卡拉发布2023年半年度报告，上半年营业收入29.69亿元，同比下降1.37%，净利润5.11亿元，同比增长54.69%，基本每股收益为0.66元/股。	19:08:58_x000D_ 【拉卡拉：2023年上半年净利润同比增长54.69%】财联社7月28日电，拉卡拉发布2023年半年度报告，上半年营业收入29.69亿元，同比下降1.37%，净利润5.11亿元，同比增长54.69%，基本每股收益为0.66元/股。
20230806	【山西证券：当下为较优布局窗口期 配置上应该更加积极】财联社8月6日电，山西证券指出，宏观经济整体已经出现转暖信号，工企营收利润率的拖累收窄，PPI预计也已基本在6月触及底部。往后看，当下为较优布局窗口期，配置上应该更加积极。一方面，经过持续的调整后，部分行业已经处于“估值底”，在由“政策底”走向“市场底”的过程中，正面刺激往往助推形成反弹行情，顺周期的低估值板块配置性价比较高；另一方面，宏观经济基本面的改善以及企业盈利能力的逐步修复能够在政策暖风后逐步推动形成上行趋势，反转在即。	12:28:37_x000D_ 【山西证券：当下为较优布局窗口期 配置上应该更加积极】财联社8月6日电，山西证券指出，宏观经济整体已经出现转暖信号，工企营收利润率的拖累收窄，PPI预计也已基本在6月触及底部。往后看，当下为较优布局窗口期，配置上应该更加积极。一方面，经过持续的调整后，部分行业已经处于“估值底”，在由“政策底”走向“市场底”的过程中，正面刺激往往助推形成反弹行情，顺周期的低估值板块配置性价比较高；另一方面，宏观经济基本面的改善以及企业盈利能力的逐步修复能够在政策暖风后逐步推动形成上行趋势，反转在即。
20230815	【远兴能源：阿拉善天然碱项目一期第一条生产线目前正在进行装置调试并产出产品 产能逐步释放】财联社8月15日电，远兴能源在互动平台表示，阿拉善天然碱项目一期第一条生产线目前正在进行装置调试并产出产品，产能逐步释放。项目后续将对一期其余生产线逐条投料试车，投产进度根据装置试车情况而定。	13:23:38_x000D_ 【远兴能源：阿拉善天然碱项目一期第一条生产线目前正在进行装置调试并产出产品 产能逐步释放】财联社8月15日电，远兴能源在互动平台表示，阿拉善天然碱项目一期第一条生产线目前正在进行装置调试并产出产品，产能逐步释放。项目后续将对一期其余生产线逐条投料试车，投产进度根据装置试车情况而定。
20230630	【怡亚通：联合运营的海砂项目正式开采】财联社6月30日电，怡亚通公告，6月28日，公司与汕尾投控联合运营的海砂项目正式开采。该项目位于广东省汕尾市红海湾施公寮岛海域，面积1.95万平方米，可采资源量2860.52万立方米。	17:43:28_x000D_ 【怡亚通：联合运营的海砂项目正式开采】财联社6月30日电，怡亚通公告，6月28日，公司与汕尾投控联合运营的海砂项目正式开采。该项目位于广东省汕尾市红海湾施公寮岛海域，面积1.95万平方米，可采资源量2860.52万立方米。
20230703	【卫宁健康：公司实际控制人、董事长被留置】财联社7月3日电，卫宁健康早间公告，公司工作人员于7月2日收到茂名市监察委员会的电话通知，公司实际控制人、董事长周炜被实施留置措施。经公司与周炜家属确认，周炜于7月1日被实施留置措施。除周炜外的公司其他全部董事、监事、高级管理人员目前均正常履职。	08:11:27_x000D_ 【卫宁健康：公司实际控制人、董事长被留置】财联社7月3日电，卫宁健康早间公告，公司工作人员于7月2日收到茂名市监察委员会的电话通知，公司实际控制人、董事长周炜被实施留置措施。经公司与周炜家属确认，周炜于7月1日被实施留置措施。除周炜外的公司其他全部董事、监事、高级管理人员目前均正常履职。
20230705	10:29 _x000D_ [[+_+]]_x000D_ 专享 专享_x000D_ 【电报解读】多地持续高温致用电负荷频破纪录，虚拟电厂是提升电网系统灵活性高性价比之选，这家企业签订了虚拟电厂项目合作框架协议 解锁直达>>	10:29 _x000D_ [[+_+]]_x000D_ 专享 专享_x000D_ 【电报解读】多地持续高温致用电负荷频破纪录，虚拟电厂是提升电网系统灵活性高性价比之选，这家企业签订了虚拟电厂项目合作框架协议 解锁直达>>
20230706	21:23 _x000D_ [[+_+]]_x000D_ 专享 专享_x000D_ 【风口研报·洞察】全球出货量回暖、多家厂商集体涨价，这个行业即将迎来三季度旺季拉货需求提升，分析师称国内厂商联手控稼动率+海外产能出清是本轮周期反转的关键；	21:23 _x000D_ [[+_+]]_x000D_ 专享 专享_x000D_ 【风口研报·洞察】全球出货量回暖、多家厂商集体涨价，这个行业即将迎来三季度旺季拉货需求提升，分析师称国内厂商联手控稼动率+海外产能出清是本轮周期反转的关键；7月哪些行业面临“中报+政策预期”共振？ 解锁直达>>
20230704	【华润三九：中药材价格上涨对总体成本影响幅度相对较小】财联社7月4日电，华润三九接受机构调研时表示，中药材价格今年有一定幅度上涨，公司产品所使用的中药材品种数量众多，各药材价格变动程度不一，对总体成本影响幅度相对较小。长期来看，中药材由于人工成本、稀缺等因素，价格趋于上涨态势。公司希望通过加大种植技术研究、提升智能制造水平、制定适当的采购策略等举措，化解药材上涨带来的影响。同时三九具有一定的品牌溢价能力，也进一步助力化解中药材长期涨价问题。今年配方颗粒业务预计实现恢复性增长，下半年随着国标备案品种数量逐渐增加以及去年同期基数较低预计会有更快增长。	16:02:16_x000D_ 【华润三九：中药材价格上涨对总体成本影响幅度相对较小】财联社7月4日电，华润三九接受机构调研时表示，中药材价格今年有一定幅度上涨，公司产品所使用的中药材品种数量众多，各药材价格变动程度不一，对总体成本影响幅度相对较小。长期来看，中药材由于人工成本、稀缺等因素，价格趋于上涨态势。公司希望通过加大种植技术研究、提升智能制造水平、制定适当的采购策略等举措，化解药材上涨带来的影响。同时三九具有一定的品牌溢价能力，也进一步助力化解中药材长期涨价问题。今年配方颗粒业务预计实现恢复性增长，下半年随着国标备案品种数量逐渐增加以及去年同期基数较低预计会有更快增长。
20230718	【兴森科技：未计划在FCBGA封装基板中采用无芯板技术】财联社7月18日电，兴森科技在互动平台表示，多芯片FCBGA，多层FCBGA，2.3/2.5D封装等对FCBGA封装基板的要求是类似的，公司均具备相关能力。无芯板FCBGA封装基板和有芯板FCBGA封装基板的芯板制作工艺流程不同，公司虽具备无芯板基板的生产能力，但目前因无相关客户需求，未计划在FCBGA封装基板中采用无芯板技术。公司的技术发展方向和产品规划将根据市场和客户需求进行布局和调整。	09:36:55_x000D_ 【兴森科技：未计划在FCBGA封装基板中采用无芯板技术】财联社7月18日电，兴森科技在互动平台表示，多芯片FCBGA，多层FCBGA，2.3/2.5D封装等对FCBGA封装基板的要求是类似的，公司均具备相关能力。无芯板FCBGA封装基板和有芯板FCBGA封装基板的芯板制作工艺流程不同，公司虽具备无芯板基板的生产能力，但目前因无相关客户需求，未计划在FCBGA封装基板中采用无芯板技术。公司的技术发展方向和产品规划将根据市场和客户需求进行布局和调整。
20230705	【益盛药业：振源胶囊中选全国中成药集采】财联社7月5日电，益盛药业公告，7月5日，全国中成药联合采购办公室发布了全国中成药联盟采购公告（第4号），公司产品振源胶囊中选本次集中带量采购。中选价格29元/盒（本次全国中成药集采所有产品平均降幅为49.36%，振源胶囊降幅为14.5%）。截至目前，振源胶囊销售收入占公司总体营收比例较高。	16:53:15_x000D_ 【益盛药业：振源胶囊中选全国中成药集采】财联社7月5日电，益盛药业公告，7月5日，全国中成药联合采购办公室发布了全国中成药联盟采购公告（第4号），公司产品振源胶囊中选本次集中带量采购。中选价格29元/盒（本次全国中成药集采所有产品平均降幅为49.36%，振源胶囊降幅为14.5%）。截至目前，振源胶囊销售收入占公司总体营收比例较高。
20230710	【金钼股份：上半年净利同比预增约100.01%至130.09%】财联社7月10日电，金钼股份公告，公司预计2023年半年度归属于母公司的净利润在13.3亿元至15.3亿元之间，同比上涨约100.01%至130.09%。报告期内，国际钼市场价格高位震荡，主要钼产品价格同比上涨，公司产品盈利能力有效提升，业绩同比大幅上升。	15:37:35_x000D_ 【金钼股份：上半年净利同比预增约100.01%至130.09%】财联社7月10日电，金钼股份公告，公司预计2023年半年度归属于母公司的净利润在13.3亿元至15.3亿元之间，同比上涨约100.01%至130.09%。报告期内，国际钼市场价格高位震荡，主要钼产品价格同比上涨，公司产品盈利能力有效提升，业绩同比大幅上升。
20230713	【运达股份：公司在手订单充足 产能充沛】财联社7月13日电，运达股份在互动平台表示，公司在手订单充足，产能充沛，生产经营一切正常。	15:20:39_x000D_ 【运达股份：公司在手订单充足 产能充沛】财联社7月13日电，运达股份在互动平台表示，公司在手订单充足，产能充沛，生产经营一切正常。
20230721	07:04 _x000D_ [[+_+]]_x000D_ 专享 专享_x000D_ 【研选】快充行业催化频出，产业链材料端迎投资机遇，分析师看好这两大细分领域；浦东新区直属国有控股上市公司，产业创新生态构筑者和产业资源的组织者，公司投资蓝天	07:04 _x000D_ [[+_+]]_x000D_ 专享 专享_x000D_ 【研选】快充行业催化频出，产业链材料端迎投资机遇，分析师看好这两大细分领域；浦东新区直属国有控股上市公司，产业创新生态构筑者和产业资源的组织者，公司投资蓝天硬核新突破 解锁直达>>
20230507	【中国长城：基于S5000系列平台的服务器产品正在加速推进中】财联社5月7日电，中国长城近期接受投资者调研时称，基于S5000系列平台的服务器产品正在加速推进中，新产品处于国内领先水平。除已有的AI服务器外，公司将加推新品，充分满足市场需求。	17:23:21_x000D_ 【中国长城：基于S5000系列平台的服务器产品正在加速推进中】财联社5月7日电，中国长城近期接受投资者调研时称，基于S5000系列平台的服务器产品正在加速推进中，新产品处于国内领先水平。除已有的AI服务器外，公司将加推新品，充分满足市场需求。
20230510	【特朗普被裁定性侵 向女作家赔偿500万美元】财联社5月10日电，据BBC报道，曼哈顿联邦法院的一个陪审团裁定，美国前总统特朗普于1990年代在纽约一家百货公司性虐待了一名杂志专栏作家卡罗尔，需向其赔偿500万美元。报道称，陪审团裁定特朗普对卡罗尔的性虐待和诽谤负有责任，但他们没有裁定特朗普对强奸负有责任。特朗普曾在2022年10月发表的帖子中诽谤了卡罗尔，他在帖子中称她的指控是“骗局”。对于性虐待，陪审团判给卡罗尔200万美元，以及2万美元的惩罚性赔偿。对于诽谤，陪审员针对特朗普10月的帖子判赔100万美元，为损害卡罗尔名誉再判给170万美元和28万美元的惩罚性赔偿。这是美国总统首次因性侵犯而被判有罪。对此，特朗普发帖称陪审团的裁决是“彻头彻尾的耻辱”，并表示这是“有史以来最大的政治迫害的延续”。他还称他完全不知道卡罗尔是谁。	10:43:05_x000D_ 【特朗普被裁定性侵 向女作家赔偿500万美元】财联社5月10日电，据BBC报道，曼哈顿联邦法院的一个陪审团裁定，美国前总统特朗普于1990年代在纽约一家百货公司性虐待了一名杂志专栏作家卡罗尔，需向其赔偿500万美元。_x000D_ _x000D_ _x000D_ _x000D_ 报道称，陪审团裁定特朗普对卡罗尔的性虐待和诽谤负有责任，但他们没有裁定特朗普对强奸负有责任。特朗普曾在2022年10月发表的帖子中诽谤了卡罗尔，他在帖子中称她的指控是“骗局”。_x000D_ _x000D_ _x000D_ _x000D_ 对于性虐待，陪审团判给卡罗尔200万美元，以及2万美元的惩罚性赔偿。对于诽谤，陪审员针对特朗普10月的帖子判赔100万美元，为损害卡罗尔名誉再判给170万美元和28万美元的惩罚性赔偿。_x000D_ _x000D_ _x000D_ _x000D_…
20230630	【中储股份：中国物流集团全资子公司拟增持不低于1%公司股份】财联社6月30日电，中储股份公告，中国物流集团有限公司全资子公司中国物流集团资本管理有限公司拟增持不低于1%公司股份。	18:22:46_x000D_ 【中储股份：中国物流集团全资子公司拟增持不低于1%公司股份】财联社6月30日电，中储股份公告，中国物流集团有限公司全资子公司中国物流集团资本管理有限公司拟增持不低于1%公司股份。
20230706	【拓斯达：目前公司在墨西哥、越南、泰国等国家均有布局】财联社7月6日电，拓斯达在互动平台表示，目前公司在墨西哥、越南、泰国等国家均有布局，主要为客户提供工业机器人自动化应用系统业务、注塑机及配套、数控机床、智能能源及环境管理系统业务，其中公司在越南的布局更早，业务开拓已有明显成效，积累了一定程度的品牌优势，为其他海外市场的持续推进奠定了良好的基础；今年开始公司加大在墨西哥的布局，目前已有几个重要项目正在有序推进，后续会持续加大力度投入。	14:09:35_x000D_ 【拓斯达：目前公司在墨西哥、越南、泰国等国家均有布局】财联社7月6日电，拓斯达在互动平台表示，目前公司在墨西哥、越南、泰国等国家均有布局，主要为客户提供工业机器人自动化应用系统业务、注塑机及配套、数控机床、智能能源及环境管理系统业务，其中公司在越南的布局更早，业务开拓已有明显成效，积累了一定程度的品牌优势，为其他海外市场的持续推进奠定了良好的基础；今年开始公司加大在墨西哥的布局，目前已有几个重要项目正在有序推进，后续会持续加大力度投入。
20230713	【甘李药业：上半年预盈1.2亿元-1.6亿元 同比扭亏】财联社7月13日电，甘李药业发布业绩预告，预计上半年净利润为1.2亿元到1.6亿元，同比将实现扭亏为盈。上半年，国内销售收入大幅增长，国内胰岛素制剂产品销量较上年同期实现翻倍增长，特别是非长秀霖系列产品的销量增长尤为显著；国际销售订单增加，国际销售收入较上年同期大幅增长。	16:03:06_x000D_ 【甘李药业：上半年预盈1.2亿元-1.6亿元 同比扭亏】财联社7月13日电，甘李药业发布业绩预告，预计上半年净利润为1.2亿元到1.6亿元，同比将实现扭亏为盈。上半年，国内销售收入大幅增长，国内胰岛素制剂产品销量较上年同期实现翻倍增长，特别是非长秀霖系列产品的销量增长尤为显著；国际销售订单增加，国际销售收入较上年同期大幅增长。
20230311	【全国政协委员阎峰：建议采用降低股票交易印花税以刺激多种需求】财联社3月11日电，全国政协委员、国泰君安国际董事长阎峰10日上午在全国政协十四届一次会议经济界别委员围绕“如何更好统筹供给侧结构性改革和扩大内需”进行小组讨论时建议，采用降低股票交易印花税以刺激多种需求，通过发展资本市场提高有效需求。目前我国股票交易印花税占税收比例15%左右，降低股票交易印花税对国家税收影响较小，但可以加大投资需求，提高流动性和配合证券市场的注册制改革，优化企业估值，在拓宽民营企业融资渠道的同时刺激消费。 (证券时报)	16:37_x000D_ 【全国政协委员阎峰：建议采用降低股票交易印花税以刺激多种需求】财联社3月11日电，全国政协委员、国泰君安国际董事长阎峰10日上午在全国政协十四届一次会议经济界别委员围绕“如何更好统筹供给侧结构性改革和扩大内需”进行小组讨论时建议，采用降低股票交易印花税以刺激多种需求，通过发展资本市场提高有效需求。目前我国股票交易印花税占税收比例15%左右，降低股票交易印花税对国家税收影响较小，但可以加大投资需求，提高流动性和配合证券市场的注册制改革，优化企业估值，在拓宽民营企业融资渠道的同时刺激消费。 (证券时报)
20230313	【杨紫琼成奥斯卡首位华裔“影后”】财联社3月13日电，第95届奥斯卡颁奖典礼的领奖台上，迎来了奥斯卡历史上第一位华裔“影后”——杨紫琼。这位祖籍中国福建、出生于马来西亚、成名于中国香港、在好莱坞闯出广阔天地的著名女演员，战胜了被誉为“大魔王”的奥斯卡多届“影后”凯特·布兰切特，获封本届奥斯卡最佳女主角，在她第61年的人生时光里迎来了高光时刻。	12:30_x000D_ 【杨紫琼成奥斯卡首位华裔“影后”】财联社3月13日电，第95届奥斯卡颁奖典礼的领奖台上，迎来了奥斯卡历史上第一位华裔“影后”——杨紫琼。这位祖籍中国福建、出生于马来西亚、成名于中国香港、在好莱坞闯出广阔天地的著名女演员，战胜了被誉为“大魔王”的奥斯卡多届“影后”凯特·布兰切特，获封本届奥斯卡最佳女主角，在她第61年的人生时光里迎来了高光时刻。
20230630	【日照港：拟收购烟台外代53%股权等资产 进一步拓展物流业务】财联社6月30日电，日照港公告，公司拟与交易对方签署股权和资产收购意向书，收购烟台外代53%股权、仁海货运51%股权、远海船代49%股权、海纳仓储51%股权、远昌船代100%股权、蓬莱外代49%股权、保税物流中心89.58%股权以及日照港集团部分资产。本次交易将进一步拓展公司物流业务，有利于满足客户多元化服务需求，进一步增强港口综合竞争力。交易标的定价、交易价款支付方式、支付期限、过渡期安排、交付或过户时间安排等内容，由正式股权和资产收购协议约定。	16:00:02_x000D_ 【日照港：拟收购烟台外代53%股权等资产 进一步拓展物流业务】财联社6月30日电，日照港公告，公司拟与交易对方签署股权和资产收购意向书，收购烟台外代53%股权、仁海货运51%股权、远海船代49%股权、海纳仓储51%股权、远昌船代100%股权、蓬莱外代49%股权、保税物流中心89.58%股权以及日照港集团部分资产。本次交易将进一步拓展公司物流业务，有利于满足客户多元化服务需求，进一步增强港口综合竞争力。交易标的定价、交易价款支付方式、支付期限、过渡期安排、交付或过户时间安排等内容，由正式股权和资产收购协议约定。
20230707	【步科股份：公司主要为机器人厂商提供核心零部件】财联社7月7日电，步科股份在互动平台表示，公司主要为机器人厂商提供核心零部件。	09:06:16_x000D_ 【步科股份：公司主要为机器人厂商提供核心零部件】财联社7月7日电，步科股份在互动平台表示，公司主要为机器人厂商提供核心零部件。
20230713	【荣耀折叠屏V2钛合金轴盖主要供应商为金太阳】财联社7月13日电，从供应链人士处获悉，荣耀昨日发布了最新折叠屏产品Magic V2，其钛合金轴盖主要供应商为金太阳。这个器件先由先由铂力特进行3D打印，接着由金太阳进行研磨和抛光，最后交由瑞声进行组装。 (界面新闻)	10:16:21_x000D_ 【荣耀折叠屏V2钛合金轴盖主要供应商为金太阳】财联社7月13日电，从供应链人士处获悉，荣耀昨日发布了最新折叠屏产品Magic V2，其钛合金轴盖主要供应商为金太阳。这个器件先由先由铂力特进行3D打印，接着由金太阳进行研磨和抛光，最后交由瑞声进行组装。 (界面新闻)
20230620	【中信证券：政策迎来密集催化 充电桩需求加速上行】财联社6月20日电，中信证券研报指出，6月19日，国务院办公厅发布《关于进一步构建高质量充电基础设施体系的指导意见》，目标构建高质量充电基础设施体系，更好支撑新能源汽车产业发展，促进汽车等大宗消费，助力实现碳达峰碳中和目标。从政策端看，年初以来，国家相关部门陆续发布重磅政策文件，涉及公共领域电动化、充电基础设施支持新能源汽车下乡等，充电桩行业迎来密集的政策催化；从需求端看，随着新能源汽车保有量的逐渐增长、高压快充车型对大功率充电的需求，充电桩进入加速建设期。在政策与需求双重刺激下，充电桩产业链上下游公司有望受益。推荐两条投资主线：1）设备端——充电桩建设加速带来需求释放；2）运营端——充电利用率提升带来盈利改善。	08:31:03_x000D_ 【中信证券：政策迎来密集催化 充电桩需求加速上行】财联社6月20日电，中信证券研报指出，6月19日，国务院办公厅发布《关于进一步构建高质量充电基础设施体系的指导意见》，目标构建高质量充电基础设施体系，更好支撑新能源汽车产业发展，促进汽车等大宗消费，助力实现碳达峰碳中和目标。从政策端看，年初以来，国家相关部门陆续发布重磅政策文件，涉及公共领域电动化、充电基础设施支持新能源汽车下乡等，充电桩行业迎来密集的政策催化；从需求端看，随着新能源汽车保有量的逐渐增长、高压快充车型对大功率充电的需求，充电桩进入加速建设期。在政策与需求双重刺激下，充电桩产业链上下游公司有望受益。推荐两条投资主线：1）设备端——充电桩建设加速带来需求释放；2）运营端——充电利用率提升带来盈利改善。
20230620	09:07 _x000D_ [[+_+]]_x000D_ 专享 专享_x000D_ 【盘中宝】年初以来陆续发布重磅政策文件，充电桩需求加速上行，2023年或为销量高增之年，这家公司已取得国网公司供应商资质 解锁直达>>	09:07 _x000D_ [[+_+]]_x000D_ 专享 专享_x000D_ 【盘中宝】年初以来陆续发布重磅政策文件，充电桩需求加速上行，2023年或为销量高增之年，这家公司已取得国网公司供应商资质 解锁直达>>
20230524	【午评：沪指探底回升跌0.49% 芯片概念股集体反弹】财联社5月24日电，市场早盘探底回升，三大指数涨跌不一，创业板指相对较强。盘面上，半导体板块震荡反弹，光刻胶、存储芯片方向领涨，容大感光、朗科科技、富乐德20CM涨停，万润科技、睿能科技、格林达涨停。CPO概念股大涨，光库科技20CM涨停，剑桥科技涨停。智能制造概念股继续活跃，百胜智能、滕亚精工、赛摩智能20CM涨停。AI概念股盘中反弹，电魂网络、天娱数科涨停。此外，高位股继续强势，日播时尚9连板，杭州热电9天8板。下跌方面，医药股集体调整，兰卫医学、金石亚药跌超5%。总体上个股涨多跌少，两市超2800只个上涨。沪深两市今日成交额5041亿，较上个交易日放量259亿。板块方面，光刻胶、CPO、存储芯片、工业母机等板块涨幅居前，新冠药、供销社、房地产、银行等板块跌幅居前。截至上午收盘，沪指跌0.49%，深成指跌0.08%，创业板指涨0.…	11:33:11_x000D_ 【午评：沪指探底回升跌0.49% 芯片概念股集体反弹】财联社5月24日电，市场早盘探底回升，三大指数涨跌不一，创业板指相对较强。盘面上，半导体板块震荡反弹，光刻胶、存储芯片方向领涨，容大感光、朗科科技、富乐德20CM涨停，万润科技、睿能科技、格林达涨停。CPO概念股大涨，光库科技20CM涨停，剑桥科技涨停。智能制造概念股继续活跃，百胜智能、滕亚精工、赛摩智能20CM涨停。AI概念股盘中反弹，电魂网络、天娱数科涨停。此外，高位股继续强势，日播时尚9连板，杭州热电9天8板。下跌方面，医药股集体调整，兰卫医学、金石亚药跌超5%。总体上个股涨多跌少，两市超2800只个上涨。沪深两市今日成交额5041亿，较上个交易日放量259亿。板块方面，光刻胶、CPO、存储芯片、工业母机等板块涨幅居前，新冠药、供销社、房地产、银行等板块跌幅居前。截至上午收盘，沪指跌0.49%，深…
20230619	【午评：三大指数小幅下跌 CPO概念股持续大涨】财联社6月19日电，市场早盘震荡调整，三大指数均小幅下跌。盘面上，AI概念股继续活跃，CPO方向持续大涨，光迅科技涨停，源杰科技等多股再创新高；AI服务器方向走强，工业富联、浪潮信息、中科曙光均创历史新高；数据要素及安全方向开盘冲高，中远海科、同为股份涨停；应用软件方向震荡走强，鼎捷软件20CM2连板，金证股份涨停。无人驾驶概念股表现活跃，北斗星通、锐明技术、得润电子涨停。下跌方面，中字头、一带一路概念股展开调整，小商品城一度跌停。总体上个股跌多涨少，两市超2800只个股下跌。沪深两市今日成交额6989亿，较上个交易日放量613亿。板块方面，CPO、数据安全、存储芯片、国产软件等板块涨幅居前，房地产、零售、厨卫电器、白酒等板块跌幅居前。截至上午收盘，沪指跌0.54%，深成指跌0.32%，创业板指跌0.33%。北向资金方面，沪股通早盘净流入2…	11:33:05_x000D_ 【午评：三大指数小幅下跌 CPO概念股持续大涨】财联社6月19日电，市场早盘震荡调整，三大指数均小幅下跌。盘面上，AI概念股继续活跃，CPO方向持续大涨，光迅科技涨停，源杰科技等多股再创新高；AI服务器方向走强，工业富联、浪潮信息、中科曙光均创历史新高；数据要素及安全方向开盘冲高，中远海科、同为股份涨停；应用软件方向震荡走强，鼎捷软件20CM2连板，金证股份涨停。无人驾驶概念股表现活跃，北斗星通、锐明技术、得润电子涨停。下跌方面，中字头、一带一路概念股展开调整，小商品城一度跌停。总体上个股跌多涨少，两市超2800只个股下跌。沪深两市今日成交额6989亿，较上个交易日放量613亿。板块方面，CPO、数据安全、存储芯片、国产软件等板块涨幅居前，房地产、零售、厨卫电器、白酒等板块跌幅居前。截至上午收盘，沪指跌0.54%，深成指跌0.32%，创业板指跌0.33%。…
20230610	【广汽埃安副总经理称为材料厂打长工不现实 “主机厂是你永远得罪不起的”】财联社6月10日电，广汽埃安新能源汽车有限公司副总经理席忠民在2023世界动力电池大会期间发表主题演讲时表示，“（材料厂）想让我们打长工，但这是不现实的。头部企业的拉动才是最重要的。”并称，“电池厂跟头部企业一看材料这么贵，也就去找矿了，都想去占领前端的市场，但最大的龙头是主机厂……所以大家记住主机厂是你永远得罪不起。”（小财注：今日早间，广汽埃安副总经理表示，原来以为车厂是为电池厂打工，后来才知道都是为材料厂打工而且还是打的长工。）（财联社记者邢祺欣）	13:12:44_x000D_ 【广汽埃安副总经理称为材料厂打长工不现实 “主机厂是你永远得罪不起的”】财联社6月10日电，广汽埃安新能源汽车有限公司副总经理席忠民在2023世界动力电池大会期间发表主题演讲时表示，“（材料厂）想让我们打长工，但这是不现实的。头部企业的拉动才是最重要的。”并称，“电池厂跟头部企业一看材料这么贵，也就去找矿了，都想去占领前端的市场，但最大的龙头是主机厂……所以大家记住主机厂是你永远得罪不起。”（小财注：今日早间，广汽埃安副总经理表示，原来以为车厂是为电池厂打工，后来才知道都是为材料厂打工而且还是打的长工。）（财联社记者邢祺欣）
20230612	【中文传媒：子公司拟出资4000万元认购私募股权基金份额】财联社6月12日电，中文传媒公告，公司全资子公司蓝海国投拟认购深创投红土基金发起设立的湖南湘江智能基金，基金规模预计募集资金总额5亿元，其中，蓝海国投作为有限合伙人拟以自有资金出资4000万元，认缴出资比例为8.00%。	17:28:57_x000D_ 【中文传媒：子公司拟出资4000万元认购私募股权基金份额】财联社6月12日电，中文传媒公告，公司全资子公司蓝海国投拟认购深创投红土基金发起设立的湖南湘江智能基金，基金规模预计募集资金总额5亿元，其中，蓝海国投作为有限合伙人拟以自有资金出资4000万元，认缴出资比例为8.00%。
20230807	【午评：创业板指跌近1% 医药股全线调整】财联社8月7日电，市场早盘低开后震荡调整，创业板指领跌。盘面上，AI概念股迎来反弹，CPO概念股开盘走强，太辰光涨超10%，兆龙互连等多股涨超5%；游戏传媒股盘中大涨，金逸影视、中原传媒、上海电影涨停；算力概念股一度冲高，利通电子涨停，工业富联涨超5%。农业股表现活跃，金健米业、宏辉果蔬涨停。券商、互联网金融概念股震荡分化，安硕信息20CM2连板，首创证券、哈投股份涨停。下跌方面，医药股全线调整，一品红、欧普康视等跌超10%。总体上个股跌多涨少，两市超3300只个下跌。沪深两市今日成交额5767亿，较上个交易日缩量468亿。板块方面，农业、超导、传媒、CPO等板块涨幅居前，创新药、房地产、生物制品、医疗器械等板块跌幅居前。截至收盘，沪指跌0.56%，深成指跌0.72%，创业板指跌0.98%。北向资金方面，沪股通早盘净流入6.87亿，深股通早盘净流…	11:32:29_x000D_ 【午评：创业板指跌近1% 医药股全线调整】财联社8月7日电，市场早盘低开后震荡调整，创业板指领跌。盘面上，AI概念股迎来反弹，CPO概念股开盘走强，太辰光涨超10%，兆龙互连等多股涨超5%；游戏传媒股盘中大涨，金逸影视、中原传媒、上海电影涨停；算力概念股一度冲高，利通电子涨停，工业富联涨超5%。农业股表现活跃，金健米业、宏辉果蔬涨停。券商、互联网金融概念股震荡分化，安硕信息20CM2连板，首创证券、哈投股份涨停。下跌方面，医药股全线调整，一品红、欧普康视等跌超10%。总体上个股跌多涨少，两市超3300只个下跌。沪深两市今日成交额5767亿，较上个交易日缩量468亿。板块方面，农业、超导、传媒、CPO等板块涨幅居前，创新药、房地产、生物制品、医疗器械等板块跌幅居前。截至收盘，沪指跌0.56%，深成指跌0.72%，创业板指跌0.98%。北向资金方面，沪股通早盘…
20230317	【经济日报：车市价格战谨防用力过猛】财联社3月17日电，经济日报文章指出，新能源汽车价格战尚未平息，燃油车价格战又烽烟四起。此轮燃油车价格战爆发的原因不外乎三点：一是车市开局遇冷。二是“国六B”排放标准切换压力。三是新能源汽车挤压燃油车生存空间。市场竞争本就是一场淘汰赛。根据市场需求变化，企业合理利用价格竞争手段，可以提升产品销量，扩大市场份额，实现产业重组升级。问题在于，此次燃油车价格战由于地方政府的因素，又呈现博弈的复杂性。还要警惕的是，此轮燃油车价格战中，弥漫着过度炒作之风。更有不少自媒体在网上散播各种假消息，加剧市场恐慌。当然，价格战肯定会在一定程度上利好消费者，毕竟能用更少的钱买到同样的车型。但要警惕的是，价格战也是一把双刃剑，在砍向对方的同时，也在伤害自己。如果价格战用力过猛，不仅会对品牌造成伤害，还会影响到利润积累。	08:18_x000D_ 【经济日报：车市价格战谨防用力过猛】财联社3月17日电，经济日报文章指出，新能源汽车价格战尚未平息，燃油车价格战又烽烟四起。此轮燃油车价格战爆发的原因不外乎三点：一是车市开局遇冷。二是“国六B”排放标准切换压力。三是新能源汽车挤压燃油车生存空间。市场竞争本就是一场淘汰赛。根据市场需求变化，企业合理利用价格竞争手段，可以提升产品销量，扩大市场份额，实现产业重组升级。问题在于，此次燃油车价格战由于地方政府的因素，又呈现博弈的复杂性。还要警惕的是，此轮燃油车价格战中，弥漫着过度炒作之风。更有不少自媒体在网上散播各种假消息，加剧市场恐慌。当然，价格战肯定会在一定程度上利好消费者，毕竟能用更少的钱买到同样的车型。但要警惕的是，价格战也是一把双刃剑，在砍向对方的同时，也在伤害自己。如果价格战用力过猛，不仅会对品牌造成伤害，还会影响到利润积累。
20230210	【金三江收关注函：要求详细说明转增比例是否与公司业绩增长幅度相匹配】财联社2月10日电，金三江收深交所关注函，公司发布年报称拟10转9派3元，深交所要求其结合所处行业特点、公司发展阶段、经营模式、未来发展战略、近两年一期净利润、净资产、每股收益等主要财务指标的增长情况及可持续性等，详细说明制定此次利润分配方案的主要考虑、确定依据及其合理性，转增比例是否与公司业绩增长幅度相匹配，是否存在炒作股价的情形，并充分提示相关风险。	09:16_x000D_ 【金三江收关注函：要求详细说明转增比例是否与公司业绩增长幅度相匹配】财联社2月10日电，金三江收深交所关注函，公司发布年报称拟10转9派3元，深交所要求其结合所处行业特点、公司发展阶段、经营模式、未来发展战略、近两年一期净利润、净资产、每股收益等主要财务指标的增长情况及可持续性等，详细说明制定此次利润分配方案的主要考虑、确定依据及其合理性，转增比例是否与公司业绩增长幅度相匹配，是否存在炒作股价的情形，并充分提示相关风险。
20230112	【华光环能：签订技术开发合同 共同开发灵活性低氮高效燃煤锅炉技术】财联社1月12日电，华光环能公告，公司与中国科学院工程热物理研究所签订了《技术开发合同书》，共同开发“灵活性低氮高效燃煤锅炉技术”和“灵活性低氮高效燃煤锅炉技术产品”。“灵活性低氮高效燃煤锅炉技术”是一种火电灵活性改造技术，适用于热电联产或发电的煤粉锅炉。技术可使锅炉在20%-110%负荷范围内稳定燃烧，同时实现超低NOx排放。	16:16_x000D_ 【华光环能：签订技术开发合同 共同开发灵活性低氮高效燃煤锅炉技术】财联社1月12日电，华光环能公告，公司与中国科学院工程热物理研究所签订了《技术开发合同书》，共同开发“灵活性低氮高效燃煤锅炉技术”和“灵活性低氮高效燃煤锅炉技术产品”。“灵活性低氮高效燃煤锅炉技术”是一种火电灵活性改造技术，适用于热电联产或发电的煤粉锅炉。技术可使锅炉在20%-110%负荷范围内稳定燃烧，同时实现超低NOx排放。
20230412	21:06 _x000D_ [[+_+]]_x000D_ 专享 专享_x000D_ 【财联社早知道】最新！央企30亿布局数据产业，中电数据产业有限公司注册成立，这家央企旗下公司可为各种AI应用提供坚实算力底座 解锁直达>>	21:06 _x000D_ [[+_+]]_x000D_ 专享 专享_x000D_ 【财联社早知道】最新！央企30亿布局数据产业，中电数据产业有限公司注册成立，这家央企旗下公司可为各种AI应用提供坚实算力底座 解锁直达>>
20230416	【海思科：循康特殊医学用途电解质配方食品获得特殊医学用途配方食品注册证书】财联社4月16日电，海思科公告，全资子公司辽宁海思科制药有限公司于近日收到国家市场监督管理总局下发的《特殊医学用途配方食品注册证书》，产品名称为循康特殊医学用途电解质配方食品。	15:33:39_x000D_ 【海思科：循康特殊医学用途电解质配方食品获得特殊医学用途配方食品注册证书】财联社4月16日电，海思科公告，全资子公司辽宁海思科制药有限公司于近日收到国家市场监督管理总局下发的《特殊医学用途配方食品注册证书》，产品名称为循康特殊医学用途电解质配方食品。
20230417	【中科曙光：2022年净利润15.44亿元 同比增长31.27%】财联社4月17日电，中科曙光公告，2022年净利润15.44亿元，同比增长31.27%。	19:58:21_x000D_ 【中科曙光：2022年净利润15.44亿元 同比增长31.27%】财联社4月17日电，中科曙光公告，2022年净利润15.44亿元，同比增长31.27%。
20230424	【上海钢联：拟与新通联共同出资设立上海钢联木材数据有限公司】财联社4月24日电，上海钢联公告，拟与新通联共同出资设立上海钢联木材数据有限公司，从事木材产业数据服务。	19:33:31_x000D_ 【上海钢联：拟与新通联共同出资设立上海钢联木材数据有限公司】财联社4月24日电，上海钢联公告，拟与新通联共同出资设立上海钢联木材数据有限公司，从事木材产业数据服务。
20230427	【中信证券：一季度净利润同比增长3.6%】财联社4月27日电，中信证券公告，一季度净利润54.17亿元，同比增长3.6%。	16:56:20_x000D_ 【中信证券：一季度净利润同比增长3.6%】财联社4月27日电，中信证券公告，一季度净利润54.17亿元，同比增长3.6%。
20230116	12:52 _x000D_ [[+_+]]_x000D_ 专享 专享_x000D_ 【狙击龙虎榜午盘】金融股持续发力指数形成突破，午后关注资金回流数字经济的可能 解锁直达>>	12:52 _x000D_ [[+_+]]_x000D_ 专享 专享_x000D_ 【狙击龙虎榜午盘】金融股持续发力指数形成突破，午后关注资金回流数字经济的可能 解锁直达>>
20230719	【工信部：将出台指导算力基础设施高质量发展的政策文件】财联社7月19日电，工业和信息化部新闻发言人赵志国今日在新闻发布会上表示，将重点从以下三个方面着手，进一步加快推动我国算力高质量发展。一是持续推动算力基础设施建设。出台指导算力基础设施高质量发展的政策文件，加大高性能智算供给，加强先进存储产品部署，开展算力网络优化行动，加快构建云边端协同、算存运融合的一体化、多层次的算力基础设施体系。指导有关单位和地方积极探索，加强算力资源统筹和互联互通，实现资源高效集约利用。二是聚力推进关键核心技术攻关和产业升级。加强先进计算、算网融合等技术研究和核心器件、设备攻关，着力推动大模型算法、框架等基础性原创性技术突破，提升产业基础高级化水平。三是激发算力应用赋能价值。面向人工智能、大数据等新兴领域需求强化算力支撑，持续赋能科技创新。	11:06:08_x000D_ 【工信部：将出台指导算力基础设施高质量发展的政策文件】财联社7月19日电，工业和信息化部新闻发言人赵志国今日在新闻发布会上表示，将重点从以下三个方面着手，进一步加快推动我国算力高质量发展。一是持续推动算力基础设施建设。出台指导算力基础设施高质量发展的政策文件，加大高性能智算供给，加强先进存储产品部署，开展算力网络优化行动，加快构建云边端协同、算存运融合的一体化、多层次的算力基础设施体系。指导有关单位和地方积极探索，加强算力资源统筹和互联互通，实现资源高效集约利用。二是聚力推进关键核心技术攻关和产业升级。加强先进计算、算网融合等技术研究和核心器件、设备攻关，着力推动大模型算法、框架等基础性原创性技术突破，提升产业基础高级化水平。三是激发算力应用赋能价值。面向人工智能、大数据等新兴领域需求强化算力支撑，持续赋能科技创新。
20230508	【主力资金监控：大金融板块净流入超73亿】财联社5月8日电，财联社星矿数据显示，今日主力资金净流入大金融、银行、非银金融等板块，净流出医药生物、化工、食品饮料等板块，其中大金融板块净流入73.67亿。个股方面，中国船舶涨停，主力资金净买入11.19亿元，科大讯飞、中信证券、中国平安等获主力资金净流入居前；汤姆猫遭净卖出超5亿，蓝色光标、小商品城、长江传媒等主力资金净流出额居前。	14:19:09_x000D_ 【主力资金监控：大金融板块净流入超73亿】财联社5月8日电，财联社星矿数据显示，今日主力资金净流入大金融、银行、非银金融等板块，净流出医药生物、化工、食品饮料等板块，其中大金融板块净流入73.67亿。个股方面，中国船舶涨停，主力资金净买入11.19亿元，科大讯飞、中信证券、中国平安等获主力资金净流入居前；汤姆猫遭净卖出超5亿，蓝色光标、小商品城、长江传媒等主力资金净流出额居前。
20230518	【中际旭创：光模块800G高速产品毛利率较高 正在持续上量】财联社5月18日电，中际旭创今天20%涨停。记者今天以投资者身份致电公司，中际旭创表示，受到算力、云计算等多方面因素提振，公司订单有所增长，对未来几年的市场有信心。目前光模块高速产品800G正在持续上量，和400G相比，800G高速产品毛利率较高 。未来800G产品不会完全替代400G，但是估计产量上，800G高速产品将逐步占据主导地位。 (第一财经)	13:27:44_x000D_ 【中际旭创：光模块800G高速产品毛利率较高 正在持续上量】财联社5月18日电，中际旭创今天20%涨停。记者今天以投资者身份致电公司，中际旭创表示，受到算力、云计算等多方面因素提振，公司订单有所增长，对未来几年的市场有信心。目前光模块高速产品800G正在持续上量，和400G相比，800G高速产品毛利率较高 。未来800G产品不会完全替代400G，但是估计产量上，800G高速产品将逐步占据主导地位。 (第一财经)
20230206	【北信源：公司通信聚合平台-信源密信可通过ddio接口与ChatGPT快速接入】财联社2月6日电，北信源在互动平台表示，公司打造的跨终端、全方位、安全可信的通信聚合平台-信源密信可通过ddio接口与ChatGPT快速接入，创建机器人实现人机交互，如聊天机器人、智能客服等。	12:03_x000D_ 【北信源：公司通信聚合平台-信源密信可通过ddio接口与ChatGPT快速接入】财联社2月6日电，北信源在互动平台表示，公司打造的跨终端、全方位、安全可信的通信聚合平台-信源密信可通过ddio接口与ChatGPT快速接入，创建机器人实现人机交互，如聊天机器人、智能客服等。
20230109	【ST大集：截至2022年12月31日 过去连续十二个月累计发生的诉讼、仲裁金额合计约为10.03亿元】财联社1月9日电，ST大集公告，新合作商贸连锁集团有限公司及其一致行动人以合同纠纷为由对公司及公司控股股东海航商业控股有限公司及其一致行动人提起诉讼。截至本公告披露日，原被告双方已在法院的组织下进行了庭前证据交换，尚未正式开庭，待法院一审判决后，公司将及时履行信息披露义务。截至2022年12月31日，除上述重大诉讼外，公司及子公司过去连续十二个月累计发生的诉讼、仲裁金额合计约为10.03亿元（含已撤诉案件金额），占公司最近一期经审计净资产绝对值的8.21%。	21:36_x000D_ 【ST大集：截至2022年12月31日 过去连续十二个月累计发生的诉讼、仲裁金额合计约为10.03亿元】财联社1月9日电，ST大集公告，新合作商贸连锁集团有限公司及其一致行动人以合同纠纷为由对公司及公司控股股东海航商业控股有限公司及其一致行动人提起诉讼。截至本公告披露日，原被告双方已在法院的组织下进行了庭前证据交换，尚未正式开庭，待法院一审判决后，公司将及时履行信息披露义务。截至2022年12月31日，除上述重大诉讼外，公司及子公司过去连续十二个月累计发生的诉讼、仲裁金额合计约为10.03亿元（含已撤诉案件金额），占公司最近一期经审计净资产绝对值的8.21%。
20230616	【中科院：自主研制新一代人工智能大模型问世】财联社6月16日电，中国科学院自动化研究所今天上午在上海发布了该所研制的新一代人工智能大模型——紫东太初2.0。全新大模型相比第一代着力提升了决策与判断能力，实现了从感知、认知到决策的跨越，未来将在医疗、交通、工业生产等领域发挥更大作用。作为我国首个存储千亿参数的图文音三模态大模型，第一代紫东太初人工智能大模型在2021年问世时实现了无标识的图像、文字、语音的识别能力，这次发布的新一代大模型则升级融入了视频、传感信号、3D点云等识别能力，突破了多模态分组认知编码、解码，全模态认知等关键技术，提升了系统的决策和判断能力，打通了系统识别能力从感知、认知到决策的通路，从而拓展出更为广泛的应用场景。目前，紫东太初大模型已经在神经外科手术导航、短视频内容审核、医疗多模态鉴别诊断、交通违规图像研读等多领域应用。	11:06:00_x000D_ 【中科院：自主研制新一代人工智能大模型问世】财联社6月16日电，中国科学院自动化研究所今天上午在上海发布了该所研制的新一代人工智能大模型——紫东太初2.0。全新大模型相比第一代着力提升了决策与判断能力，实现了从感知、认知到决策的跨越，未来将在医疗、交通、工业生产等领域发挥更大作用。作为我国首个存储千亿参数的图文音三模态大模型，第一代紫东太初人工智能大模型在2021年问世时实现了无标识的图像、文字、语音的识别能力，这次发布的新一代大模型则升级融入了视频、传感信号、3D点云等识别能力，突破了多模态分组认知编码、解码，全模态认知等关键技术，提升了系统的决策和判断能力，打通了系统识别能力从感知、认知到决策的通路，从而拓展出更为广泛的应用场景。目前，紫东太初大模型已经在神经外科手术导航、短视频内容审核、医疗多模态鉴别诊断、交通违规图像研读等多领域应用。
20230609	【香飘飘董事长蒋建琪回应近期频繁减持：为引入战略投资者】财联社6月9日电，近期，香飘飘实控人、董事长蒋建琪频频减持公司股份。据香飘飘公告，5月15日及5月23日，蒋建琪通过大宗交易方式分别减持100万股、299.5万股。另据上交所官网，蒋建琪于6月6日通过大宗交易方式减持110万股。为何蒋建琪要在此时大举减持股份？6月9日，蒋建琪通过微信回复记者表示：“目的是引入一个战略投资者。” (每日经济新闻)	14:08:24_x000D_ 【香飘飘董事长蒋建琪回应近期频繁减持：为引入战略投资者】财联社6月9日电，近期，香飘飘实控人、董事长蒋建琪频频减持公司股份。据香飘飘公告，5月15日及5月23日，蒋建琪通过大宗交易方式分别减持100万股、299.5万股。另据上交所官网，蒋建琪于6月6日通过大宗交易方式减持110万股。为何蒋建琪要在此时大举减持股份？6月9日，蒋建琪通过微信回复记者表示：“目的是引入一个战略投资者。” (每日经济新闻)
20230216	22:15 _x000D_ [[+_+]]_x000D_ 专享 专享_x000D_ 【公告全知道】ChatGPT+数字经济+信创+芯片+人工智能+数据中心！公司机器人具备自然语言处理技术 解锁直达>>	22:15 _x000D_ [[+_+]]_x000D_ 专享 专享_x000D_ 【公告全知道】ChatGPT+数字经济+信创+芯片+人工智能+数据中心！公司机器人具备自然语言处理技术 解锁直达>>
20230618	【弘信电子：与摩尔线程签署战略合作框架协议】财联社6月18日电，弘信电子公告，公司与摩尔线程签署《战略合作框架协议》，合作打造自主可控的AI人工智能软硬件基础设施，并最终升级为在算力系统领域的全方位战略协同。	16:30:16_x000D_ 【弘信电子：与摩尔线程签署战略合作框架协议】财联社6月18日电，弘信电子公告，公司与摩尔线程签署《战略合作框架协议》，合作打造自主可控的AI人工智能软硬件基础设施，并最终升级为在算力系统领域的全方位战略协同。
20230508	08:30 _x000D_ [[+_+]]_x000D_ 专享 专享_x000D_ 【盘中宝•数据】中特估细分行业+高分红上市公司一览（附表） 解锁直达>>	08:30 _x000D_ [[+_+]]_x000D_ 专享 专享_x000D_ 【盘中宝•数据】中特估细分行业+高分红上市公司一览（附表） 解锁直达>>
20230517	【中南传媒：目前正在筹备人工智能实验室】财联社5月17日电，中南传媒在互动平台表示，公司高度重视人工智能技术在出版中的应用。在数字教育、融媒体出版、大众数字阅读等方面已使用人工智能技术。目前正在积极筹备人工智能实验室，让人工智能技术为传统出版赋能。	09:35:49_x000D_ 【中南传媒：目前正在筹备人工智能实验室】财联社5月17日电，中南传媒在互动平台表示，公司高度重视人工智能技术在出版中的应用。在数字教育、融媒体出版、大众数字阅读等方面已使用人工智能技术。目前正在积极筹备人工智能实验室，让人工智能技术为传统出版赋能。
20230520	【吴晓求：一些业绩好的中国商业银行估值偏低】财联社5月20日电，在2023清华五道口全球金融论坛上，中国人民大学中国资本市场研究院院长吴晓求表示，一些业绩好的中国商业银行估值低。“中国商业银行长期PE是3倍-5倍；PB大多数时间都低于1，估值偏低。全球市场相类似的金融机构，估值95%以上要高过中国的银行；这些金融机构的PE在8倍左右、甚至10倍，PB在1左右的很多。”（财联社记者 王宏）	17:14:18_x000D_ 【吴晓求：一些业绩好的中国商业银行估值偏低】财联社5月20日电，在2023清华五道口全球金融论坛上，中国人民大学中国资本市场研究院院长吴晓求表示，一些业绩好的中国商业银行估值低。“中国商业银行长期PE是3倍-5倍；PB大多数时间都低于1，估值偏低。全球市场相类似的金融机构，估值95%以上要高过中国的银行；这些金融机构的PE在8倍左右、甚至10倍，PB在1左右的很多。”（财联社记者 王宏）
20230210	【可靠股份：近期设立了绒毛浆厂 尝试向上游原材料进行延伸】财联社2月10日电，可靠股份接受机构调研时表示，目前木浆价格仍处于高位，国外垄断程度比较高，公司也在采取相应措施来应对木浆价格居高不下的情况：研发部门正在不断研发试验，尝试用其他原材料进行替代；公司近期在广西合资设立了绒毛浆厂，尝试向上游原材料进行延伸。	21:45_x000D_ 【可靠股份：近期设立了绒毛浆厂 尝试向上游原材料进行延伸】财联社2月10日电，可靠股份接受机构调研时表示，目前木浆价格仍处于高位，国外垄断程度比较高，公司也在采取相应措施来应对木浆价格居高不下的情况：研发部门正在不断研发试验，尝试用其他原材料进行替代；公司近期在广西合资设立了绒毛浆厂，尝试向上游原材料进行延伸。
20230618	【美国务卿布林肯今早抵达北京 开启两天的访华行程】财联社6月18日电，美国国务卿布林肯已在6月18日早上抵达中国北京，开启两天访华之行。这是布林肯首次以国务卿的身份访华，这也是自2018年10月以来访问中国的最高级别美国官员。据路透社报道，预计布林肯将在18日与多名中方高级官员会面。报道分析称，此访将为未来两国之间更多高层交往铺路，包括美国财政部长耶伦、商务部长雷蒙多的访华。 (澎湃新闻)	10:56:46_x000D_ 【美国务卿布林肯今早抵达北京 开启两天的访华行程】财联社6月18日电，美国国务卿布林肯已在6月18日早上抵达中国北京，开启两天访华之行。这是布林肯首次以国务卿的身份访华，这也是自2018年10月以来访问中国的最高级别美国官员。据路透社报道，预计布林肯将在18日与多名中方高级官员会面。报道分析称，此访将为未来两国之间更多高层交往铺路，包括美国财政部长耶伦、商务部长雷蒙多的访华。 (澎湃新闻)
20230426	【三元股份：拟以现金1元收购呼三元24.66%股权】财联社4月26日电，三元股份公告，拟以现金1元收购北京市双桥农场有限公司持有的呼伦贝尔三元乳业有限责任公司24.66%的股权，本次交易完成后，公司持有呼三元100%的股权，呼三元将成为公司全资子公司。	20:34:41_x000D_ 【三元股份：拟以现金1元收购呼三元24.66%股权】财联社4月26日电，三元股份公告，拟以现金1元收购北京市双桥农场有限公司持有的呼伦贝尔三元乳业有限责任公司24.66%的股权，本次交易完成后，公司持有呼三元100%的股权，呼三元将成为公司全资子公司。
20230504	【唐德影视：AIGC技术尚未大规模应用于公司的剧集等内容创作中】财联社5月4日电，唐德影视发布股票交易严重异动公告，公司不直接拥有相关AIGC技术。截至本公告日，相关技术尚未大规模应用于公司的剧集与电影制作等内容创作中，未对公司日常经营产生重大影响。公司没有承接相关业务订单，也未产生相关业务收入。公司郑重提示广大投资者注意前沿技术在快速发展期所面临的技术研发不及预期、应用实践不及预期与行业竞争等潜在风险，冷静分析AIGC技术的发展速度与阶段性效果。近期公司经营情况及内外部经营环境未发生重大变化。	21:26:36_x000D_ 【唐德影视：AIGC技术尚未大规模应用于公司的剧集等内容创作中】财联社5月4日电，唐德影视发布股票交易严重异动公告，公司不直接拥有相关AIGC技术。截至本公告日，相关技术尚未大规模应用于公司的剧集与电影制作等内容创作中，未对公司日常经营产生重大影响。公司没有承接相关业务订单，也未产生相关业务收入。公司郑重提示广大投资者注意前沿技术在快速发展期所面临的技术研发不及预期、应用实践不及预期与行业竞争等潜在风险，冷静分析AIGC技术的发展速度与阶段性效果。近期公司经营情况及内外部经营环境未发生重大变化。
20230202	【赛力斯回应1月销售环比大降：传统淡季竞争激烈 不再大幅开店注重单店质效】财联社2月2日电，赛力斯工作人员表示，较12月份1月份的汽车销量下降较多，主要是因为1月份一般都是传统淡季，还要去除假期因素，因此出现了一些回调，1月份他们进行了一些促销活动，后期可能会出现一些销售新增。对于国内新能源汽车整体市场，对方坦言，蛋糕是有的，但市场竞争激烈，到底谁能胜出看的是综合实力和硬实力。对于市场策略，该公司工作人员表示，他们主要的途径是华为卖3C用品的手机店面渠道，去年已经在百座城市的繁华地段开店1000家店以上了，大幅度开店的情况可能不会再出现，当前要做的是着力加强单店销售的质效，因为从手机店到汽车店还是需要经过一些思维方式和消费群体认知变化的。 (第一财经)	12:20_x000D_ 【赛力斯回应1月销售环比大降：传统淡季竞争激烈 不再大幅开店注重单店质效】财联社2月2日电，赛力斯工作人员表示，较12月份1月份的汽车销量下降较多，主要是因为1月份一般都是传统淡季，还要去除假期因素，因此出现了一些回调，1月份他们进行了一些促销活动，后期可能会出现一些销售新增。对于国内新能源汽车整体市场，对方坦言，蛋糕是有的，但市场竞争激烈，到底谁能胜出看的是综合实力和硬实力。对于市场策略，该公司工作人员表示，他们主要的途径是华为卖3C用品的手机店面渠道，去年已经在百座城市的繁华地段开店1000家店以上了，大幅度开店的情况可能不会再出现，当前要做的是着力加强单店销售的质效，因为从手机店到汽车店还是需要经过一些思维方式和消费群体认知变化的。 (第一财经)
20230707	【工业富联：完成董事会换届选举 郑弘孟接替李军旗当选董事长】财联社7月7日电，7月7日晚，工业富联公告，公司当日完成了董事会、监事会换届选举，郑弘孟、李军旗、刘俊杰、丁肇邦当选非独立董事，李昕、李丹、廖翠萍当选独立董事，新一届董事会选举郑弘孟为董事长，并聘请郑弘孟为总经理，这就意味着该公司原董事长李军旗将不再担任工业富联董事长。	19:34:34_x000D_ 【工业富联：完成董事会换届选举 郑弘孟接替李军旗当选董事长】财联社7月7日电，7月7日晚，工业富联公告，公司当日完成了董事会、监事会换届选举，郑弘孟、李军旗、刘俊杰、丁肇邦当选非独立董事，李昕、李丹、廖翠萍当选独立董事，新一届董事会选举郑弘孟为董事长，并聘请郑弘孟为总经理，这就意味着该公司原董事长李军旗将不再担任工业富联董事长。
20230724	【鲁抗医药：注射用头孢米诺钠通过仿制药一致性评价】财联社7月24日电，鲁抗医药公告，获国家药品监督管理局颁发的关于注射用头孢米诺钠的《药品补充申请批准通知书》，该药品通过仿制药质量和疗效一致性评价。	17:43:33_x000D_ 【鲁抗医药：注射用头孢米诺钠通过仿制药一致性评价】财联社7月24日电，鲁抗医药公告，获国家药品监督管理局颁发的关于注射用头孢米诺钠的《药品补充申请批准通知书》，该药品通过仿制药质量和疗效一致性评价。
20230728	08:12 _x000D_ [[+_+]]_x000D_ 专享 专享_x000D_ 【点金互动易】汽车热管理+新能源车，产品已广泛配套于大众、奥迪、福特等知名品牌，这家企业已获近60项细分产品定点信 解锁直达>>	08:12 _x000D_ [[+_+]]_x000D_ 专享 专享_x000D_ 【点金互动易】汽车热管理+新能源车，产品已广泛配套于大众、奥迪、福特等知名品牌，这家企业已获近60项细分产品定点信 解锁直达>>
20230103	【早间公告】①梦网科技：子公司深圳梦网近日与联通在线签署《智信技术服务合同》，深圳梦网将为“智信”产品解决方案，提供技术支撑服务。②汇创达：收到中国证监会关于同意公司向段志刚等发行股份购买资产并募集配套资金注册的批复。	08:24_x000D_ 【早间公告】①梦网科技：子公司深圳梦网近日与联通在线签署《智信技术服务合同》，深圳梦网将为“智信”产品解决方案，提供技术支撑服务。_x000D_ _x000D_ ②汇创达：收到中国证监会关于同意公司向段志刚等发行股份购买资产并募集配套资金注册的批复。
20230223	【温州拟发一次性生育补贴 一至三孩家庭分别补一千至三千元】财联社2月23日电，《温州市户籍人口一次性生育补贴发放办法》正在市政府官网公开征求意见，其中提到，对符合条件的家庭生育一孩、二孩、三孩的，分别发放一次性生育补贴1000元、2000元和3000元。根据《办法》，享受一次性生育补贴的对象需满足2022年9月24日（含）起分娩且分娩时夫妻双方或单方为温州市户籍人口，其中单方户籍人口需子女落户温州，补贴经费由县（市、区）财政专项资金安排。	08:15_x000D_ 【温州拟发一次性生育补贴 一至三孩家庭分别补一千至三千元】财联社2月23日电，《温州市户籍人口一次性生育补贴发放办法》正在市政府官网公开征求意见，其中提到，对符合条件的家庭生育一孩、二孩、三孩的，分别发放一次性生育补贴1000元、2000元和3000元。根据《办法》，享受一次性生育补贴的对象需满足2022年9月24日（含）起分娩且分娩时夫妻双方或单方为温州市户籍人口，其中单方户籍人口需子女落户温州，补贴经费由县（市、区）财政专项资金安排。
20230317	【中核钛白：拟5亿元对外投资设立公司】财联社3月17日电，中核钛白公告，为优化资源配置，完善战略布局，促进产业健康发展，中核华原钛白股份有限公司拟出资设立哈密中合钒钛有限公司，注册资本人民币5亿元，公司持有其100%股份。	17:18_x000D_ 【中核钛白：拟5亿元对外投资设立公司】财联社3月17日电，中核钛白公告，为优化资源配置，完善战略布局，促进产业健康发展，中核华原钛白股份有限公司拟出资设立哈密中合钒钛有限公司，注册资本人民币5亿元，公司持有其100%股份。
20230321	【奇安信：股东奇安壹号拟减持不超过2%公司股份】财联社3月21日电，奇安信公告，股东奇安壹号拟减持公司股份不超过1370.2股份，即不超过公司总股本的2%。	16:47_x000D_ 【奇安信：股东奇安壹号拟减持不超过2%公司股份】财联社3月21日电，奇安信公告，股东奇安壹号拟减持公司股份不超过1370.2股份，即不超过公司总股本的2%。
20230327	21:34 _x000D_ [[+_+]]_x000D_ 专享 专享_x000D_ 【狙击龙虎榜】AI赋能万物炒作开启 关注低位补涨个股频出的可能 解锁直达>>	21:34 _x000D_ [[+_+]]_x000D_ 专享 专享_x000D_ 【狙击龙虎榜】AI赋能万物炒作开启 关注低位补涨个股频出的可能 解锁直达>>
20230330	23:23 _x000D_ [[+_+]]_x000D_ 专享 专享_x000D_ 【电报解读】一季度净利同比预增近250%，成功研发6英寸新一代半导体产品并批量生产，产能或将大增9倍，这家企业细分产品未来市场规模预计超100亿美元 解锁直	23:23 _x000D_ [[+_+]]_x000D_ 专享 专享_x000D_ 【电报解读】一季度净利同比预增近250%，成功研发6英寸新一代半导体产品并批量生产，产能或将大增9倍，这家企业细分产品未来市场规模预计超100亿美元 解锁直达>>
20230830	【市场传闻称量化基金将被规范 机构人士称收到过针对本周一行情的电话问询】财联社8月30日电，昨天市场又传出量化基金将被规范的消息。有市场传闻指，相关部门将召集量化基金去青岛开会，相关的制度也将在10月份之前出台。不过，也有量化团队表示，还未收到类似的通知。另外，据机构人士透露，的确收到过针对本周一行情的电话问询。涉及的问题包括本周一的量化策略执行情况、相关的交易情况等。 (证券时报)	11:40:46_x000D_ 【市场传闻称量化基金将被规范 机构人士称收到过针对本周一行情的电话问询】财联社8月30日电，昨天市场又传出量化基金将被规范的消息。有市场传闻指，相关部门将召集量化基金去青岛开会，相关的制度也将在10月份之前出台。不过，也有量化团队表示，还未收到类似的通知。另外，据机构人士透露，的确收到过针对本周一行情的电话问询。涉及的问题包括本周一的量化策略执行情况、相关的交易情况等。 (证券时报)
20230906	【康泰医学：部分监事、高管减持期限届满 未减持股份】财联社9月6日电，康泰医学公告，公司于近日收到监事高瑞斌，高级管理人员付春元、寇国治、刘振红分别出具的《关于减持计划实施完毕告知函》，截至9月5日，上述股东的减持计划期限届满，未通过任何方式减持公司股份。	19:35:38_x000D_ 【康泰医学：部分监事、高管减持期限届满 未减持股份】财联社9月6日电，康泰医学公告，公司于近日收到监事高瑞斌，高级管理人员付春元、寇国治、刘振红分别出具的《关于减持计划实施完毕告知函》，截至9月5日，上述股东的减持计划期限届满，未通过任何方式减持公司股份。
20230711	【捷佳伟创：与晶澳太阳能签订日常40.4亿元经营重大合同】财联社7月11日电，捷佳伟创公告，2022年7月10日至2023年7月10日期间，公司及下属子公司与晶澳太阳能有限公司及其下属子公司在连续十二个月内签订了日常经营合同，合同累计金额为人民币40.4亿元（含税），占公司2022年度经审计主营业务收入的72.86%。	21:35:52_x000D_ 【捷佳伟创：与晶澳太阳能签订日常40.4亿元经营重大合同】财联社7月11日电，捷佳伟创公告，2022年7月10日至2023年7月10日期间，公司及下属子公司与晶澳太阳能有限公司及其下属子公司在连续十二个月内签订了日常经营合同，合同累计金额为人民币40.4亿元（含税），占公司2022年度经审计主营业务收入的72.86%。
20230713	【亨通光电：上半年净利润同比预增35%-55%】财联社7月13日电，亨通光电公告，预计2023年半年度实现净利润为11.61亿元-13.33亿元，同比增加35%-55%。报告期内，国家电网和新能源基础建设稳步推进；同时受惠于国内5G网络、物联网、大数据的继续发展，“东数西算”的部署、人工智能的应用发展等推动了通信网络传输能力的持续建设，带动相关业务保持较快增长。	18:22:03_x000D_ 【亨通光电：上半年净利润同比预增35%-55%】财联社7月13日电，亨通光电公告，预计2023年半年度实现净利润为11.61亿元-13.33亿元，同比增加35%-55%。报告期内，国家电网和新能源基础建设稳步推进；同时受惠于国内5G网络、物联网、大数据的继续发展，“东数西算”的部署、人工智能的应用发展等推动了通信网络传输能力的持续建设，带动相关业务保持较快增长。
20230320	【正式宣布！瑞银集团以30亿瑞士法郎收购瑞士信贷银行】财联社3月20日电，瑞士联邦政府19日宣布，瑞士信贷银行将被瑞银集团收购。瑞银集团当天发布公告说，根据全股份交易的条款，瑞信股东每持有22.48股瑞信股份将获得1股瑞银集团股份，相当于每股0.76瑞士法郎（1美元约合0.9252瑞士法郎），总对价30亿瑞士法郎。这笔交易将创建一个拥有超过5万亿美元投资资产的公司。公告说，此次收购是在瑞士联邦政府、瑞士金融市场监管局和瑞士国家银行的支持下实现的。两家银行都可以通过瑞士国家银行获得流动性支持。	07:14_x000D_ 【正式宣布！瑞银集团以30亿瑞士法郎收购瑞士信贷银行】财联社3月20日电，瑞士联邦政府19日宣布，瑞士信贷银行将被瑞银集团收购。瑞银集团当天发布公告说，根据全股份交易的条款，瑞信股东每持有22.48股瑞信股份将获得1股瑞银集团股份，相当于每股0.76瑞士法郎（1美元约合0.9252瑞士法郎），总对价30亿瑞士法郎。这笔交易将创建一个拥有超过5万亿美元投资资产的公司。公告说，此次收购是在瑞士联邦政府、瑞士金融市场监管局和瑞士国家银行的支持下实现的。两家银行都可以通过瑞士国家银行获得流动性支持。
20230330	14:08 _x000D_ [[+_+]]_x000D_ 专享 专享_x000D_ 【盘中宝】欧盟可再生能源消费占比大幅提升，国内新公开招标量创历史新高，这家公司风电业务占多家巨头供货量60%以上 解锁直达>>	14:08 _x000D_ [[+_+]]_x000D_ 专享 专享_x000D_ 【盘中宝】欧盟可再生能源消费占比大幅提升，国内新公开招标量创历史新高，这家公司风电业务占多家巨头供货量60%以上 解锁直达>>
20230810	【凯莱英：公司所有生产基地均未受台风、洪涝不良影响】财联社8月10日电，凯莱英在互动平台表示，公司所有生产基地均未受台风、洪涝不良影响，生产经营正常进行。	15:05:30_x000D_ 【凯莱英：公司所有生产基地均未受台风、洪涝不良影响】财联社8月10日电，凯莱英在互动平台表示，公司所有生产基地均未受台风、洪涝不良影响，生产经营正常进行。
20230815	【艾德生物：与阿斯利康达成抗体偶联药物（ADC）伴随诊断合作】财联社8月15日电，艾德生物公告，近日，公司与AstraZenecaUKLimited（简称“阿斯利康”）签署了合作协议。公司自主研发的人类10基因突变联合检测试剂盒（可逆末端终止测序法）将基于ENHERTU®药物开发伴随诊断用途，用以筛选HER2（ERBB2）突变阳性的非小细胞肺癌（NSCLC）患者。	16:44:33_x000D_ 【艾德生物：与阿斯利康达成抗体偶联药物（ADC）伴随诊断合作】财联社8月15日电，艾德生物公告，近日，公司与AstraZenecaUKLimited（简称“阿斯利康”）签署了合作协议。公司自主研发的人类10基因突变联合检测试剂盒（可逆末端终止测序法）将基于ENHERTU®药物开发伴随诊断用途，用以筛选HER2（ERBB2）突变阳性的非小细胞肺癌（NSCLC）患者。
20230818	【岱勒新材：公司产线目前基本满产运行 产能随着设备的分批安装调试正在逐步提升】财联社8月18日电，岱勒新材在互动平台表示，公司产线目前基本满产运行，产能随着设备的分批安装调试正在逐步提升。	09:20:59_x000D_ 【岱勒新材：公司产线目前基本满产运行 产能随着设备的分批安装调试正在逐步提升】财联社8月18日电，岱勒新材在互动平台表示，公司产线目前基本满产运行，产能随着设备的分批安装调试正在逐步提升。
20230214	【金龙羽收关注函：说明固态电池试制产品实际进度 是否存在“蹭热点”等情形】财联社2月14日电，金龙羽收深交所关注函，要求说明公司建立固态电池相关研发中心、小试或中试生产线试制产品的实际进度安排，研究开发成果可产业化以及核算盈利的预计时间；固态电池相关技术研究成功和产业化研究成功预计所需投入的资金总额，当前实际投入情况，产业化相关的人财物储备、对公司2022年度及本年度业绩影响等情况。根据相关规定，详细说明近期接待机构和个人投资者调研的情况，是否存在违反信息公平披露的情形，是否存在误导投资者、“蹭热点”炒作股价等情形。核查公司控股股东、实际控制人，董事、监事、高级管理人员及其直系亲属是否存在买卖公司股票的行为，是否存在涉嫌内幕交易的情形。	20:38_x000D_ 【金龙羽收关注函：说明固态电池试制产品实际进度 是否存在“蹭热点”等情形】财联社2月14日电，金龙羽收深交所关注函，要求说明公司建立固态电池相关研发中心、小试或中试生产线试制产品的实际进度安排，研究开发成果可产业化以及核算盈利的预计时间；固态电池相关技术研究成功和产业化研究成功预计所需投入的资金总额，当前实际投入情况，产业化相关的人财物储备、对公司2022年度及本年度业绩影响等情况。根据相关规定，详细说明近期接待机构和个人投资者调研的情况，是否存在违反信息公平披露的情形，是否存在误导投资者、“蹭热点”炒作股价等情形。核查公司控股股东、实际控制人，董事、监事、高级管理人员及其直系亲属是否存在买卖公司股票的行为，是否存在涉嫌内幕交易的情形。
20230323	【新华网：“元卯”可大幅降低数字人制作和日常使用的成本】财联社3月23日电，新华网接受机构调研时表示，新华智云“元卯”主要包括数字人、数字内容和数字场景三块，每一块都有人工智能驱动，能力覆盖文本、图片、甚至部分视频与3D场景的生成。“元卯”可大幅降低数字人制作和日常使用的成本。日常使用数字人的成本更是低至一分钟一元。目前，“元卯”仍处于刚出生阶段，还需与市场更多磨合才能有更明确的预期。	10:21_x000D_ 【新华网：“元卯”可大幅降低数字人制作和日常使用的成本】财联社3月23日电，新华网接受机构调研时表示，新华智云“元卯”主要包括数字人、数字内容和数字场景三块，每一块都有人工智能驱动，能力覆盖文本、图片、甚至部分视频与3D场景的生成。“元卯”可大幅降低数字人制作和日常使用的成本。日常使用数字人的成本更是低至一分钟一元。目前，“元卯”仍处于刚出生阶段，还需与市场更多磨合才能有更明确的预期。
20230327	【恒指转涨 此前一度跌逾2%】财联社3月27日电，恒指转涨，此前一度跌逾2%；恒生科技指数跌幅收窄至0.75%，此前一度跌逾3%。	11:49_x000D_ 【恒指转涨 此前一度跌逾2%】财联社3月27日电，恒指转涨，此前一度跌逾2%；恒生科技指数跌幅收窄至0.75%，此前一度跌逾3%。
20230329	【航民股份：环冠珠宝金饰有限公司拟减持不超过1%股份】财联社3月29日电，航民股份公告，股东环冠珠宝金饰有限公司拟减持公司股份不超过1050.82万股，即不超过公司总股本的1%。	16:13_x000D_ 【航民股份：环冠珠宝金饰有限公司拟减持不超过1%股份】财联社3月29日电，航民股份公告，股东环冠珠宝金饰有限公司拟减持公司股份不超过1050.82万股，即不超过公司总股本的1%。
20230517	【东方电热：锂电池用预镀镍钢基带业务推广进度超预期】财联社5月17日电，东方电热近日接受机构调研时表示，锂电池用预镀镍钢基带业务，目前推广进度超过公司预期。公司去年就完成了大部分国内主要客户的材料验证；下一步的流程验证还在陆续推进当中。目前的主要任务是对新生产线进行持续完善和调试。新产线生产的产品已陆续在一些新开发的客户做验证推广，如丰巢新能源、海金杜门等，反馈结果良好，部分已通过验证。公司希望今年上半年有大额订单能够落地。	13:30:47_x000D_ 【东方电热：锂电池用预镀镍钢基带业务推广进度超预期】财联社5月17日电，东方电热近日接受机构调研时表示，锂电池用预镀镍钢基带业务，目前推广进度超过公司预期。公司去年就完成了大部分国内主要客户的材料验证；下一步的流程验证还在陆续推进当中。目前的主要任务是对新生产线进行持续完善和调试。新产线生产的产品已陆续在一些新开发的客户做验证推广，如丰巢新能源、海金杜门等，反馈结果良好，部分已通过验证。公司希望今年上半年有大额订单能够落地。
20230530	【科威尔：拟定增募资不超过2.05亿元】《科创板日报》30日讯，科威尔公告，拟定增募资不超过2.05亿元，用于小功率测试电源系列产品扩产项目、补充流动资金。	17:05:34_x000D_ 【科威尔：拟定增募资不超过2.05亿元】《科创板日报》30日讯，科威尔公告，拟定增募资不超过2.05亿元，用于小功率测试电源系列产品扩产项目、补充流动资金。
20230705	【中国铁建：近期合计中标536.53亿元项目】财联社7月5日电，中国铁建公告，近期公司中标8个重大项目，项目金额合计536.53亿元，占公司2022年度经审计营业收入比例4.89%。	16:40:20_x000D_ 【中国铁建：近期合计中标536.53亿元项目】财联社7月5日电，中国铁建公告，近期公司中标8个重大项目，项目金额合计536.53亿元，占公司2022年度经审计营业收入比例4.89%。
20230705	21:05 _x000D_ [[+_+]]_x000D_ 专享 专享_x000D_ 【财联社早知道】里程碑！我国首个开源桌面操作系统发布，这家公司的操作系统生态适配数已突破180万款；国际数据空间协会等合作推动全球数据流通，这家公司设立了浙	21:05 _x000D_ [[+_+]]_x000D_ 专享 专享_x000D_ 【财联社早知道】里程碑！我国首个开源桌面操作系统发布，这家公司的操作系统生态适配数已突破180万款；国际数据空间协会等合作推动全球数据流通，这家公司设立了浙江唯一一家持牌数据交易场所 解锁直达>>
20230719	【复星医药：FCN-159片用于成人I型神经纤维瘤治疗于近日启动 III 期临床研究】财联社7月19日电，复星医药公告，控股子公司上海复星医药产业发展有限公司就FCN-159片用于成人I型神经纤维瘤治疗于近日在中国境内(不包括港澳台地区)启动III期临床研究。	17:14:31_x000D_ 【复星医药：FCN-159片用于成人I型神经纤维瘤治疗于近日启动 III 期临床研究】财联社7月19日电，复星医药公告，控股子公司上海复星医药产业发展有限公司就FCN-159片用于成人I型神经纤维瘤治疗于近日在中国境内(不包括港澳台地区)启动III期临床研究。
20230605	【创业板指跌逾1% 宁德时代跌近5%】财联社6月5日电，指数走弱，创业板指下挫跌逾1%，沪指跌0.14%，深成指跌0.50%。电商、贵金属、新能源等方向跌幅居前，两市下跌个股近2400只，创业板指权重股宁德时代跌近5%。	09:32:25_x000D_ 【创业板指跌逾1% 宁德时代跌近5%】财联社6月5日电，指数走弱，创业板指下挫跌逾1%，沪指跌0.14%，深成指跌0.50%。电商、贵金属、新能源等方向跌幅居前，两市下跌个股近2400只，创业板指权重股宁德时代跌近5%。
20230606	09:29 _x000D_ [[+_+]]_x000D_ 专享 专享_x000D_ 【盘中宝】新标准将于7月1日正式实施，多个厂均已明确搭载该产品，行业处于从0到1起步阶段，这家公司已取得行业龙头相关定点订单 解锁直达>>	09:29 _x000D_ [[+_+]]_x000D_ 专享 专享_x000D_ 【盘中宝】新标准将于7月1日正式实施，多个厂均已明确搭载该产品，行业处于从0到1起步阶段，这家公司已取得行业龙头相关定点订单 解锁直达>>
20230126	【2023年度票房破70亿】财联社1月26日电，据猫眼专业版数据显示，2023年1月26日18时，2023年度大盘票房（含预售）破70亿。《满江红》《流浪地球2》《熊出没·伴我“熊芯”》分列春节档票房前三位。	19:00_x000D_ 【2023年度票房破70亿】财联社1月26日电，据猫眼专业版数据显示，2023年1月26日18时，2023年度大盘票房（含预售）破70亿。《满江红》《流浪地球2》《熊出没·伴我“熊芯”》分列春节档票房前三位。
20230723	【乐凯新材：航天模塑已成功进入小米汽车的供应商体系】财联社7月23日电，乐凯新材在互动平台表示，公司收购的航天模塑目前尚无与无人驾驶相关的产品。航天模塑已将高端产品的研发和生产作为产品战略的重点，形成了以中高端汽车塑料零部件为核心，以汽车智慧座舱与自动驾驶的融合研发与智能制造为路径的战略发展规划。目前，航天模塑已成功进入小米汽车的供应商体系并开展内外饰产品的协同设计，部分产品已获得量产订单。	14:12:47_x000D_ 【乐凯新材：航天模塑已成功进入小米汽车的供应商体系】财联社7月23日电，乐凯新材在互动平台表示，公司收购的航天模塑目前尚无与无人驾驶相关的产品。航天模塑已将高端产品的研发和生产作为产品战略的重点，形成了以中高端汽车塑料零部件为核心，以汽车智慧座舱与自动驾驶的融合研发与智能制造为路径的战略发展规划。目前，航天模塑已成功进入小米汽车的供应商体系并开展内外饰产品的协同设计，部分产品已获得量产订单。
20230724	【银禧科技：部分董事减持股份合计不超过0.09%】财联社7月24日电，银禧科技公告，职工代表董事张德清拟减持不超过37.5万股公司股份(占公司总股本比例0.0790%)；职工代表董事谭映儿拟减持不超过5.625万股公司股份(占公司总股本比例0.0119%)。	16:27:12_x000D_ 【银禧科技：部分董事减持股份合计不超过0.09%】财联社7月24日电，银禧科技公告，职工代表董事张德清拟减持不超过37.5万股公司股份(占公司总股本比例0.0790%)；职工代表董事谭映儿拟减持不超过5.625万股公司股份(占公司总股本比例0.0119%)。
20230227	【科兴制药：2022年净亏损9028.19万元】财联社2月27日电，科兴制药公告，2022年公司实现营业收入13.16亿元，同比增长2.38%；净亏损9028.19万元。2022年年底，公司发货较上年同期有较大增长，但受新冠疫情感染、物流配送滞后等因素影响，导致部分货物验收环节出现延迟，部分收入确认滞后，影响毛利额约5500万元。	17:50_x000D_ 【科兴制药：2022年净亏损9028.19万元】财联社2月27日电，科兴制药公告，2022年公司实现营业收入13.16亿元，同比增长2.38%；净亏损9028.19万元。2022年年底，公司发货较上年同期有较大增长，但受新冠疫情感染、物流配送滞后等因素影响，导致部分货物验收环节出现延迟，部分收入确认滞后，影响毛利额约5500万元。
20230205	【润和软件：金融数字化服务终端操作系统通过金融信创生态实验室适配验证】财联社2月5日电，润和软件公告，近日，公司自主研发的HiHopeOS金融发行版软件顺利通过金融信创生态实验室的信创适配验证测试，成为业内首款符合金融信创要求的金融数字化服务终端操作系统。HiHopeOS金融发行版软件成为目前国内首款既获得银联认证又通过金融信创验证的行业“双认证”的金融数字化服务终端操作系统。	16:38_x000D_ 【润和软件：金融数字化服务终端操作系统通过金融信创生态实验室适配验证】财联社2月5日电，润和软件公告，近日，公司自主研发的HiHopeOS金融发行版软件顺利通过金融信创生态实验室的信创适配验证测试，成为业内首款符合金融信创要求的金融数字化服务终端操作系统。HiHopeOS金融发行版软件成为目前国内首款既获得银联认证又通过金融信创验证的行业“双认证”的金融数字化服务终端操作系统。
20230328	【飞龙股份：中标服务器系统、车载系统及充电桩等多个项目】财联社3月28日电，飞龙股份公告，中标某公司服务器系统、车载系统及充电桩等多个项目；目前上述项目均已进行了多轮技术交流、送样、小批量供货，部分项目开始或即将量产。	16:48_x000D_ 【飞龙股份：中标服务器系统、车载系统及充电桩等多个项目】财联社3月28日电，飞龙股份公告，中标某公司服务器系统、车载系统及充电桩等多个项目；目前上述项目均已进行了多轮技术交流、送样、小批量供货，部分项目开始或即将量产。
20230331	【法拉电子：2022年净利同比增21.21% 拟投建南海路厂区项目】财联社3月31日电，法拉电子披露年报，公司2022年实现营业收入38.36亿元，同比增36.49%；净利润10.07亿元，同比增21.21%；基本每股收益4.47元。公司拟每10股派发红利18元（含税）。另外，公司拟在厦门市海沧区南海路投建新型能源用薄膜电容器生产基地，项目固定资产投资约26亿元，预计自开工建设起三年内完成基础设施建设。	17:15:30_x000D_ 【法拉电子：2022年净利同比增21.21% 拟投建南海路厂区项目】财联社3月31日电，法拉电子披露年报，公司2022年实现营业收入38.36亿元，同比增36.49%；净利润10.07亿元，同比增21.21%；基本每股收益4.47元。公司拟每10股派发红利18元（含税）。另外，公司拟在厦门市海沧区南海路投建新型能源用薄膜电容器生产基地，项目固定资产投资约26亿元，预计自开工建设起三年内完成基础设施建设。
20230414	【长虹美菱：一季度净利润同比预增1939%-2522%】财联社4月14日电，长虹美菱公告，预计一季度净利润1.05亿元-1.35亿元，同比增长1939.79%-2522.58%。	19:42:46_x000D_ 【长虹美菱：一季度净利润同比预增1939%-2522%】财联社4月14日电，长虹美菱公告，预计一季度净利润1.05亿元-1.35亿元，同比增长1939.79%-2522.58%。
20230420	14:51 _x000D_ [[+_+]]_x000D_ 专享 专享_x000D_ 【盘中宝】过去11周内增加100万付费用户，AI已为这家公司带来上亿美元收入，这家公司已在人工智能领域与百度展开深度合作 解锁直达>>	14:51 _x000D_ [[+_+]]_x000D_ 专享 专享_x000D_ 【盘中宝】过去11周内增加100万付费用户，AI已为这家公司带来上亿美元收入，这家公司已在人工智能领域与百度展开深度合作 解锁直达>>
20230425	【环旭电子：一季度净利润同比下降36.79%】财联社4月25日电，环旭电子公告，一季度净利润2.77亿元，同比下降36.79%。公告同日，环旭电子拟在墨西哥厂临近的托纳拉地区新建第二座工厂，新工厂总投资额为6749.8万美元，公司本次拟自筹资金6000万美元通过全资子公司环鸿电子股份有限公司对墨西哥厂进行增资。	16:01:58_x000D_ 【环旭电子：一季度净利润同比下降36.79%】财联社4月25日电，环旭电子公告，一季度净利润2.77亿元，同比下降36.79%。公告同日，环旭电子拟在墨西哥厂临近的托纳拉地区新建第二座工厂，新工厂总投资额为6749.8万美元，公司本次拟自筹资金6000万美元通过全资子公司环鸿电子股份有限公司对墨西哥厂进行增资。
20230614	12:40 _x000D_ [[+_+]]_x000D_ 专享 专享_x000D_ 【盘中宝】给AI插上腾飞的翅膀，大模型场景下该产品需求爆发式增长，这家公司已自研相关产品 解锁直达>>	12:40 _x000D_ [[+_+]]_x000D_ 专享 专享_x000D_ 【盘中宝】给AI插上腾飞的翅膀，大模型场景下该产品需求爆发式增长，这家公司已自研相关产品 解锁直达>>
20230619	【朗姿股份：拟3800万元参与设立医美创投基金】财联社6月19日电，朗姿股份公告，公司拟以3800万元，作为有限合伙人出资设立医美创业投资基金—芜湖博恒二号创业投资合伙企业（有限合伙），出资比例46.91%。该基金主要通过股权投资的形式，投资于医疗美容领域及其相关产业的未上市公司股权，基金规模为8100万元。	15:42:15_x000D_ 【朗姿股份：拟3800万元参与设立医美创投基金】财联社6月19日电，朗姿股份公告，公司拟以3800万元，作为有限合伙人出资设立医美创业投资基金—芜湖博恒二号创业投资合伙企业（有限合伙），出资比例46.91%。该基金主要通过股权投资的形式，投资于医疗美容领域及其相关产业的未上市公司股权，基金规模为8100万元。
20230628	【太平鸟：收到2373万元与收益相关的政府补助】财联社6月28日电，太平鸟公告，公司及子公司于6月28日收到政府补助合计2373万元，均为与收益相关的政府补助。	16:16:58_x000D_ 【太平鸟：收到2373万元与收益相关的政府补助】财联社6月28日电，太平鸟公告，公司及子公司于6月28日收到政府补助合计2373万元，均为与收益相关的政府补助。
20230725	财联社7月25日电，俄罗斯莫斯科证券交易所将调低新股上市时的自由流通量要求。	23:29:50_x000D_ 财联社7月25日电，俄罗斯莫斯科证券交易所将调低新股上市时的自由流通量要求。
20230726	【昂利康：子公司签订兽药生产销售合作协议】财联社7月26日电，昂利康公告，为推动公司宠物药品的研发和产业化，解决公司不具备兽用原料药合格生产资格的问题，公司控股子公司动保科技拟与新合新全资子公司湖南成大就“Y-Fe-01”、“Y-Fe-02”、“Y-Fe-03”三个兽药原料药产品的研发、生产、销售达成合作意向，拟签署《兽药生产销售合作协议》。	18:54:46_x000D_ 【昂利康：子公司签订兽药生产销售合作协议】财联社7月26日电，昂利康公告，为推动公司宠物药品的研发和产业化，解决公司不具备兽用原料药合格生产资格的问题，公司控股子公司动保科技拟与新合新全资子公司湖南成大就“Y-Fe-01”、“Y-Fe-02”、“Y-Fe-03”三个兽药原料药产品的研发、生产、销售达成合作意向，拟签署《兽药生产销售合作协议》。
20230807	【声迅股份：股东合畅创投及其一致行动人合计拟减持不超 2.44%股份】财联社8月7日电，声迅股份公告，股东合畅创投及其一致行动人兼原公司董事刘建文合计拟减持不超2.44%公司股份。	20:01:12_x000D_ 【声迅股份：股东合畅创投及其一致行动人合计拟减持不超 2.44%股份】财联社8月7日电，声迅股份公告，股东合畅创投及其一致行动人兼原公司董事刘建文合计拟减持不超2.44%公司股份。
20230829	【钱江水利：拟约1.78亿元投建兰溪市登胜水厂工程项目】财联社8月29日电，钱江水利公告，公司拟投资月1.78亿元建设兰溪市登胜水厂工程项目，工程建设内容为新建规模5万吨/日供水设施。	20:24:28_x000D_ 【钱江水利：拟约1.78亿元投建兰溪市登胜水厂工程项目】财联社8月29日电，钱江水利公告，公司拟投资月1.78亿元建设兰溪市登胜水厂工程项目，工程建设内容为新建规模5万吨/日供水设施。
20230911	【联动科技：欧美国家对中国半导体的限制措施对公司影响较小】财联社9月11日电，联动科技近日接受机构调研时表示，公司测试设备的软件程序均为自主开发。公司境外采购的原材料主要为继电器、集成电路芯片等电子元器件，境外采购的原材料金额占采购总额的50%以上，目前公司采购的芯片等由境外供应商生产的原材料未被相关国家列入限制出口的商品清单，不会影响原材料的稳定供应，整体而言欧美国家对中国半导体的限制措施对公司影响较小。	15:35:54_x000D_ 【联动科技：欧美国家对中国半导体的限制措施对公司影响较小】财联社9月11日电，联动科技近日接受机构调研时表示，公司测试设备的软件程序均为自主开发。公司境外采购的原材料主要为继电器、集成电路芯片等电子元器件，境外采购的原材料金额占采购总额的50%以上，目前公司采购的芯片等由境外供应商生产的原材料未被相关国家列入限制出口的商品清单，不会影响原材料的稳定供应，整体而言欧美国家对中国半导体的限制措施对公司影响较小。
20230410	【彩讯股份：已在5G消息chatbot系统和智能外呼业务中应用AI相关技术】财联社4月10日电，彩讯股份在互动平台表示，已在5G消息chatbot系统和智能外呼业务中应用AI相关技术，并产生了实际收入。同时，公司也在积极研发下一代智能邮箱产品，也将会为公司收入带来进一步的增长。	15:01:37_x000D_ 【彩讯股份：已在5G消息chatbot系统和智能外呼业务中应用AI相关技术】财联社4月10日电，彩讯股份在互动平台表示，已在5G消息chatbot系统和智能外呼业务中应用AI相关技术，并产生了实际收入。同时，公司也在积极研发下一代智能邮箱产品，也将会为公司收入带来进一步的增长。
20230414	【钧达股份：一季度净利润同比预增1425%-1656%】财联社4月14日电，钧达股份公告，一季度净利润预计3.3亿元-3.8亿元，同比增长1425%-1656%。报告期内，受益于光伏市场需求增长以及市场对N型产品需求不断提升，公司坚持技术创新、增强企业竞争力，同时随着公司滁州基地N型TOPCon产能释放，公司实现了销售收入和盈利大幅增长。	17:04:38_x000D_ 【钧达股份：一季度净利润同比预增1425%-1656%】财联社4月14日电，钧达股份公告，一季度净利润预计3.3亿元-3.8亿元，同比增长1425%-1656%。报告期内，受益于光伏市场需求增长以及市场对N型产品需求不断提升，公司坚持技术创新、增强企业竞争力，同时随着公司滁州基地N型TOPCon产能释放，公司实现了销售收入和盈利大幅增长。
20230809	【午间公告：唐人神7月生猪销售收入同比上升35.39%】财联社8月9日电，午间多家上市公司发布公告，具体如下，①唐人神：7月生猪销售收入4.61亿元，同比上升35.39%，环比下降4.37%。1-7月累计生猪销售收入30.68亿元，同比上升93.21%。②英联股份：距离“英联转债”停止转股仅剩最后半个交易日，即8月9日下午交易时段，8月9日收市后，未实施转股的“英联转债”将停止转股。尚未实施转股的“英联转债”，将按照101.36元/张的价格强制赎回，因目前二级市场价格与赎回价格差异较大，投资者如未及时转股，可能面临损失。③永安林业：公司近日通过涿州市民政局救灾捐款专户向涿州市定向捐赠100万元，助力涿州市防汛救灾。	11:56:08_x000D_ 【午间公告：唐人神7月生猪销售收入同比上升35.39%】财联社8月9日电，午间多家上市公司发布公告，具体如下，_x000D_ _x000D_ ①唐人神：7月生猪销售收入4.61亿元，同比上升35.39%，环比下降4.37%。1-7月累计生猪销售收入30.68亿元，同比上升93.21%。_x000D_ _x000D_ ②英联股份：距离“英联转债”停止转股仅剩最后半个交易日，即8月9日下午交易时段，8月9日收市后，未实施转股的“英联转债”将停止转股。尚未实施转股的“英联转债”，将按照101.36元/张的价格强制赎回，因目前二级市场价格与赎回价格差异较大，投资者如未及时转股，可能面临损失。_x000D_ _x000D_ ③永安林业：公司近日通过涿州市民政局救灾捐款专户向涿州市定向捐赠100万元，助力涿州市防汛救灾。
20230901	【深交所：程序化交易最高申报速率在每秒300笔以上或者单日最高申报笔数在20000笔以上 本所予以重点关注】财联社9月1日电，深交所表示，程序化交易投资者报告的最高申报速率在每秒300笔以上或者单日最高申报笔数在20000笔以上的，本所予以重点关注。本所可以视情况采取调整异常交易认定标准、增加程序化交易报告内容等措施。	18:18:12_x000D_ 【深交所：程序化交易最高申报速率在每秒300笔以上或者单日最高申报笔数在20000笔以上 本所予以重点关注】财联社9月1日电，深交所表示，程序化交易投资者报告的最高申报速率在每秒300笔以上或者单日最高申报笔数在20000笔以上的，本所予以重点关注。本所可以视情况采取调整异常交易认定标准、增加程序化交易报告内容等措施。
20230911	【华懋科技：拟2.5亿元向子公司华懋研究院增资】财联社9月11日电，华懋科技公告，为建立公司新的业务增长点，推进公司新材料发展战略的落实，建设新材料孵化园孵化、培育新材料项目，公司拟向全资子公司东阳华懋新材料科技研究院有限公司（简称“华懋研究院”）增资2.5亿元，增资完成后，华懋研究院总注册资本增至5亿元。	19:51:23_x000D_ 【华懋科技：拟2.5亿元向子公司华懋研究院增资】财联社9月11日电，华懋科技公告，为建立公司新的业务增长点，推进公司新材料发展战略的落实，建设新材料孵化园孵化、培育新材料项目，公司拟向全资子公司东阳华懋新材料科技研究院有限公司（简称“华懋研究院”）增资2.5亿元，增资完成后，华懋研究院总注册资本增至5亿元。
20230324	【涪陵榨菜：2022年净利润同比增长21% 拟10转3派3.8元】财联社3月24日电，涪陵榨菜公告，2022年净利润8.99亿元，同比增长21.14%，拟10转3派3.8元。	17:53_x000D_ 【涪陵榨菜：2022年净利润同比增长21% 拟10转3派3.8元】财联社3月24日电，涪陵榨菜公告，2022年净利润8.99亿元，同比增长21.14%，拟10转3派3.8元。
20230327	10:54 _x000D_ [[+_+]]_x000D_ 专享 专享_x000D_ 【风口研报·公司】什么是反生成式AI？分析师认为AI安全的负面风险持续，公司视频图像鉴真工作站已经发布、涵盖40余种鉴定算法 解锁直达>>	10:54 _x000D_ [[+_+]]_x000D_ 专享 专享_x000D_ 【风口研报·公司】什么是反生成式AI？分析师认为AI安全的负面风险持续，公司视频图像鉴真工作站已经发布、涵盖40余种鉴定算法 解锁直达>>
20230410	18:16 _x000D_ [[+_+]]_x000D_ 专享 专享_x000D_ 【机构龙虎榜解读】光热发电+储能，获机构逾1亿元净买入，它是国内唯一光热发电全产业链布局企业，旗下储能电站是国内第一批、也是唯一在运百兆瓦级项目，客户覆盖大	18:16 _x000D_ [[+_+]]_x000D_ 专享 专享_x000D_ 【机构龙虎榜解读】光热发电+储能，获机构逾1亿元净买入，它是国内唯一光热发电全产业链布局企业，旗下储能电站是国内第一批、也是唯一在运百兆瓦级项目，客户覆盖大唐、大唐国际、华电、华能等能源集团 解锁直达>>
20230627	【露笑科技：上半年预盈1.1亿元–1.3亿元 同比扭亏】财联社6月27日电，露笑科技披露半年度业绩预告，公司预计上半年盈利1.1亿元–1.3亿元，上年同期亏损3359.75万元。业绩增长的原因是公司不断优化产品、业务结构，精密制造端业务取得快速发展，收入得到增长，利润得以提升。	17:14:56_x000D_ 【露笑科技：上半年预盈1.1亿元–1.3亿元 同比扭亏】财联社6月27日电，露笑科技披露半年度业绩预告，公司预计上半年盈利1.1亿元–1.3亿元，上年同期亏损3359.75万元。业绩增长的原因是公司不断优化产品、业务结构，精密制造端业务取得快速发展，收入得到增长，利润得以提升。
20230628	【青木股份：竞拍取得土地使用权】财联社6月28日电，青木股份公告，公司以4747万元的价格竞得“义乌国际陆港物流园1-63#地块的土地使用权”，并于6月27日与义乌市自然资源和规划局签署《挂牌成交确认书》，本次竞得土地是公司投资建设新项目的建设用地。	20:59:17_x000D_ 【青木股份：竞拍取得土地使用权】财联社6月28日电，青木股份公告，公司以4747万元的价格竞得“义乌国际陆港物流园1-63#地块的土地使用权”，并于6月27日与义乌市自然资源和规划局签署《挂牌成交确认书》，本次竞得土地是公司投资建设新项目的建设用地。
20230812	【东亚前海证券被曝裁撤整个卖方研究团队？公司回应】财联社8月12日电，在公募基金交易佣金费率或将大幅下滑的背景下，近一周，一些券商要缩编研究所的消息不断流传。日前网络有消息称，东亚前海证券宣布要裁撤整个卖方研究团队。对此，公司方面回应称，公司目前没有做出过要裁撤整个研究团队的决定，网上的传言与事实严重不符。不过，种种迹象显示，近期东亚前海研究所在市场上的活跃度较之以往有明显的降低。某知情人士向记者表示，东亚前海证券此次裁撤研究团队，与公司近期的高层变动有关，而公募基金降费因素也是催化剂。 (每经)	16:13:48_x000D_ 【东亚前海证券被曝裁撤整个卖方研究团队？公司回应】财联社8月12日电，在公募基金交易佣金费率或将大幅下滑的背景下，近一周，一些券商要缩编研究所的消息不断流传。日前网络有消息称，东亚前海证券宣布要裁撤整个卖方研究团队。对此，公司方面回应称，公司目前没有做出过要裁撤整个研究团队的决定，网上的传言与事实严重不符。不过，种种迹象显示，近期东亚前海研究所在市场上的活跃度较之以往有明显的降低。某知情人士向记者表示，东亚前海证券此次裁撤研究团队，与公司近期的高层变动有关，而公募基金降费因素也是催化剂。 (每经)
20230110	22:49 _x000D_ [[+_+]]_x000D_ 专享 专享_x000D_ 【电报解读】光伏设备+锂电+半导体，细分光伏设备全球市占率70%，22年前三季度订单额达21年营收的3倍，这家行业龙头全年净利超25家机构预期均值 解锁直达	22:49 _x000D_ [[+_+]]_x000D_ 专享 专享_x000D_ 【电报解读】光伏设备+锂电+半导体，细分光伏设备全球市占率70%，22年前三季度订单额达21年营收的3倍，这家行业龙头全年净利超25家机构预期均值 解锁直达>>
20230201	【国轩高科动力电池装车易捷特 进入雷诺-日产-三菱联盟供应商体系】财联社2月1日电，国轩高科官微消息，公司作为易捷特战略合作伙伴，为后者最新发布的轻风版小型纯电SUV纳米BOX车型提供磷酸铁锂电池。易捷特系东风汽车与雷诺-日产-三菱联盟合资企业，本次装车标志着国轩高科成功进入雷诺-日产-三菱联盟供应商体系并实现供货。	19:51_x000D_ 【国轩高科动力电池装车易捷特 进入雷诺-日产-三菱联盟供应商体系】财联社2月1日电，国轩高科官微消息，公司作为易捷特战略合作伙伴，为后者最新发布的轻风版小型纯电SUV纳米BOX车型提供磷酸铁锂电池。易捷特系东风汽车与雷诺-日产-三菱联盟合资企业，本次装车标志着国轩高科成功进入雷诺-日产-三菱联盟供应商体系并实现供货。
20230825	09:54 _x000D_ [[+_+]]_x000D_ 专享 专享_x000D_ 【盘中宝】马斯克试驾新产品，该车型即将上市，预订量已超196万辆，机构预计仅北美市场空间就接近300亿美元，这家公司已通过特斯拉一级供应商认证 解锁直达>>	09:54 _x000D_ [[+_+]]_x000D_ 专享 专享_x000D_ 【盘中宝】马斯克试驾新产品，该车型即将上市，预订量已超196万辆，机构预计仅北美市场空间就接近300亿美元，这家公司已通过特斯拉一级供应商认证 解锁直达>>
20230905	【东威科技：第三代光伏镀铜设备预计9月初发货至客户处 公司光伏设备可用于HJT、BC、TopCon等多种技术路径】财联社9月5日电，东威科技在互动平台称，公司第三代光伏镀铜设备已调试完毕，预计9月初发货至客户处。光伏铜电镀技术是采用金属铜代替银浆作为栅线电极，具备低成本、高效率等优势。公司光伏设备可用于HJT、BC、TopCon等多种技术路径。	18:25:25_x000D_ 【东威科技：第三代光伏镀铜设备预计9月初发货至客户处 公司光伏设备可用于HJT、BC、TopCon等多种技术路径】财联社9月5日电，东威科技在互动平台称，公司第三代光伏镀铜设备已调试完毕，预计9月初发货至客户处。光伏铜电镀技术是采用金属铜代替银浆作为栅线电极，具备低成本、高效率等优势。公司光伏设备可用于HJT、BC、TopCon等多种技术路径。
20230718	财联社7月18日电，印度SENSEX指数首次突破67000点，日内涨幅扩大至0.6%。	13:46:54_x000D_ 财联社7月18日电，印度SENSEX指数首次突破67000点，日内涨幅扩大至0.6%。
20230721	【森远股份：控股股东郭松森计划减持不超过6%股份】财联社7月21日电，森远股份公告，控股股东、实际控制人郭松森计划减持不超过6%股份。	18:06:43_x000D_ 【森远股份：控股股东郭松森计划减持不超过6%股份】财联社7月21日电，森远股份公告，控股股东、实际控制人郭松森计划减持不超过6%股份。
20230723	【南山铝业：拟向瑞祥检测转让山东宏山20%股权】财联社7月23日电，南山铝业公告，公司与山东瑞祥检测有限公司（简称“瑞祥检测”）就山东宏山航空锻造有限责任公司（简称“山东宏山”）20%股权转让相关事项达成一致并签署了股权转让协议，且经双方协商一致，具体转让价格将在补充协议中予以明确。截至公告日，山东宏山为公司全资子公司，持股100%。	17:16:28_x000D_ 【南山铝业：拟向瑞祥检测转让山东宏山20%股权】财联社7月23日电，南山铝业公告，公司与山东瑞祥检测有限公司（简称“瑞祥检测”）就山东宏山航空锻造有限责任公司（简称“山东宏山”）20%股权转让相关事项达成一致并签署了股权转让协议，且经双方协商一致，具体转让价格将在补充协议中予以明确。截至公告日，山东宏山为公司全资子公司，持股100%。
20230302	【钧达股份：拟向全资子公司淮安捷泰增资10亿元】财联社3月2日电，钧达股份公告，公司拟以自有资金向全资子公司淮安捷泰进行增资，增资金额为10亿元，增资后淮安捷泰的注册资本从5亿元增至15亿元。	20:12_x000D_ 【钧达股份：拟向全资子公司淮安捷泰增资10亿元】财联社3月2日电，钧达股份公告，公司拟以自有资金向全资子公司淮安捷泰进行增资，增资金额为10亿元，增资后淮安捷泰的注册资本从5亿元增至15亿元。
20230310	【润和软件：正起草AI战略白皮书 确定下一步重点投入方向】财联社3月10日电，润和软件在接受调研时表示，为保持业务的领先性，公司将会持续加大研发投入，并以市场和客户的需求为创新导向，重点在开源欧拉、开源鸿蒙、智慧双碳园区等创新业务领域持续推动技术和产品创新。目前公司正在起草AI战略白皮书，确定人工智能领域的下一步重点投入方向。	21:56_x000D_ 【润和软件：正起草AI战略白皮书 确定下一步重点投入方向】财联社3月10日电，润和软件在接受调研时表示，为保持业务的领先性，公司将会持续加大研发投入，并以市场和客户的需求为创新导向，重点在开源欧拉、开源鸿蒙、智慧双碳园区等创新业务领域持续推动技术和产品创新。目前公司正在起草AI战略白皮书，确定人工智能领域的下一步重点投入方向。
20230802	【8月2日午间涨停分析】今日午盘两市共14股涨停，连板股总数7只，22股封板未遂，封板率为39%（不含ST股、退市股及未开板新股）。个股方面，超导概念股法尔胜6天4板、国缆检测创业板2板、中孚实业2板，算力板块鸿博股份8天4板，地产股云南城投2板，大金融板块财达证券2板。	11:41:51_x000D_ 【8月2日午间涨停分析】今日午盘两市共14股涨停，连板股总数7只，22股封板未遂，封板率为39%（不含ST股、退市股及未开板新股）。个股方面，超导概念股法尔胜6天4板、国缆检测创业板2板、中孚实业2板，算力板块鸿博股份8天4板，地产股云南城投2板，大金融板块财达证券2板。
20230809	11:44 _x000D_ [[+_+]]_x000D_ 专享 专享_x000D_ 【掘金行业龙头】信创+操作系统+数据库，信创OA领域市场份额全国第三，操作系统聚焦通用和车载两大体系，这家公司在信创基础软件层全覆盖 解锁直达>>	11:44 _x000D_ [[+_+]]_x000D_ 专享 专享_x000D_ 【掘金行业龙头】信创+操作系统+数据库，信创OA领域市场份额全国第三，操作系统聚焦通用和车载两大体系，这家公司在信创基础软件层全覆盖 解锁直达>>
20230420	【新华百货：一季度净利润同比增长96%】财联社4月20日电，新华百货披露一季报，一季度实现营业收入18.42亿元，同比增长6.96%；净利润8381.82万元，同比增长96.32%。	18:04:07_x000D_ 【新华百货：一季度净利润同比增长96%】财联社4月20日电，新华百货披露一季报，一季度实现营业收入18.42亿元，同比增长6.96%；净利润8381.82万元，同比增长96.32%。
20230224	【英伟达涨幅扩大至超14%】财联社2月23日电，英伟达（NVDA）涨幅扩大至超14%，现报237.1美元/股。领跑一众芯片股和人工智能（AI）股票。	23:00_x000D_ 【英伟达涨幅扩大至超14%】财联社2月23日电，英伟达（NVDA）涨幅扩大至超14%，现报237.1美元/股。领跑一众芯片股和人工智能（AI）股票。
20230508	【豫能控股：陈召新煤田取得采矿许可证】财联社5月8日电，豫能控股公告，豫煤交易中心的子公司新乡市陈召新煤田开发有限责任公司获得河南省自然资源厅颁发的《中华人民共和国采矿许可证》。	19:06:30_x000D_ 【豫能控股：陈召新煤田取得采矿许可证】财联社5月8日电，豫能控股公告，豫煤交易中心的子公司新乡市陈召新煤田开发有限责任公司获得河南省自然资源厅颁发的《中华人民共和国采矿许可证》。
20230119	【恒瑞医药：公司部分产品纳入国家医保目录 2022年1-3季度合计销售额约为23.04亿元】财联社1月19日电，恒瑞医药公告，通过医保谈判，羟乙磺酸达尔西利片、瑞维鲁胺片、脯氨酸恒格列净片、昂丹司琼口溶膜、普瑞巴林缓释片首次纳入国家医保目录；注射用卡瑞利珠单抗通过简易续约续约成功并新增适应症纳入国家医保目录；盐酸艾司氯胺酮注射液通过简易续约保留在国家医保目录；注射用甲苯磺酸瑞马唑仑新增适应症纳入国家医保目录；培门冬酶注射液调整至常规国家医保目录；碳酸氢钠林格注射液、托伐普坦片通过竞价方式纳入国家医保目录。另外，注射用替莫唑胺直接新纳入国家医保目录。	15:56_x000D_ 【恒瑞医药：公司部分产品纳入国家医保目录 2022年1-3季度合计销售额约为23.04亿元】财联社1月19日电，恒瑞医药公告，通过医保谈判，羟乙磺酸达尔西利片、瑞维鲁胺片、脯氨酸恒格列净片、昂丹司琼口溶膜、普瑞巴林缓释片首次纳入国家医保目录；注射用卡瑞利珠单抗通过简易续约续约成功并新增适应症纳入国家医保目录；盐酸艾司氯胺酮注射液通过简易续约保留在国家医保目录；注射用甲苯磺酸瑞马唑仑新增适应症纳入国家医保目录；培门冬酶注射液调整至常规国家医保目录；碳酸氢钠林格注射液、托伐普坦片通过竞价方式纳入国家医保目录。另外，注射用替莫唑胺直接新纳入国家医保目录。
20230712	【*ST商城：法院决定公司预重整期间延长3个月】财联社7月12日电，*ST商城公告，公司收到辽宁省沈阳市中级法院送达的《决定书》，沈阳中院决定公司预重整期间延长三个月。	17:01:50_x000D_ 【*ST商城：法院决定公司预重整期间延长3个月】财联社7月12日电，*ST商城公告，公司收到辽宁省沈阳市中级法院送达的《决定书》，沈阳中院决定公司预重整期间延长三个月。
20230719	【康斯特：公司压力传感器在全球具有竞争力】财联社7月19日电，康斯特在接受机构调研时表示，公司自制压力传感器量程从几百帕到100MPa，能够覆盖95%以上的量程，虽然德国和英国部分企业的传感器也可以覆盖这个量程段，但精确度不足，公司精确度可达到万分之一。整体而言，在高精度、宽量程覆盖两个维度可以说公司在全球都具有竞争力。	18:30:46_x000D_ 【康斯特：公司压力传感器在全球具有竞争力】财联社7月19日电，康斯特在接受机构调研时表示，公司自制压力传感器量程从几百帕到100MPa，能够覆盖95%以上的量程，虽然德国和英国部分企业的传感器也可以覆盖这个量程段，但精确度不足，公司精确度可达到万分之一。整体而言，在高精度、宽量程覆盖两个维度可以说公司在全球都具有竞争力。
20230508	【天舟文化：目前天舟高考在积极探索包括AI命题等应用】财联社5月8日电，天舟文化在互动平台表示，天舟高考是公司参股公司北京永载文化有限公司开发的基于纸数融合的高考教学解决方案。产品和服务包括测评试卷、考评系统和智能题库，可以为学校的日常教学提供相关数字化支持，提供学生学情诊断和自适应学习改进。题库系统拥有目前国内较前沿的教学标签体系，可以智能测评学生的学情和认知，并为学习改进提供个性化的试题任务，进一步提升学生的问题解决能力。目前天舟高考在积极探索包括AI命题等应用。	09:37:30_x000D_ 【天舟文化：目前天舟高考在积极探索包括AI命题等应用】财联社5月8日电，天舟文化在互动平台表示，天舟高考是公司参股公司北京永载文化有限公司开发的基于纸数融合的高考教学解决方案。产品和服务包括测评试卷、考评系统和智能题库，可以为学校的日常教学提供相关数字化支持，提供学生学情诊断和自适应学习改进。题库系统拥有目前国内较前沿的教学标签体系，可以智能测评学生的学情和认知，并为学习改进提供个性化的试题任务，进一步提升学生的问题解决能力。目前天舟高考在积极探索包括AI命题等应用。
20230416	17:33 _x000D_ [[+_+]]_x000D_ 专享 专享_x000D_ 【风口研报·行业】国常会通过《商用密码管理条例（修订草案）》，行业或迎年均96亿元增量市场、2025年市场规模有望达到1400亿元；政策推动+技术迭代+市占	17:33 _x000D_ [[+_+]]_x000D_ 专享 专享_x000D_ 【风口研报·行业】国常会通过《商用密码管理条例（修订草案）》，行业或迎年均96亿元增量市场、2025年市场规模有望达到1400亿元；政策推动+技术迭代+市占率提升，分析师上看公司60%估值修复空间 解锁直达>>
20230206	【北信源：公司通信聚合平台-信源密信可通过ddio接口与ChatGPT快速接入】财联社2月6日电，北信源在互动平台表示，公司打造的跨终端、全方位、安全可信的通信聚合平台-信源密信可通过ddio接口与ChatGPT快速接入，创建机器人实现人机交互，如聊天机器人、智能客服等。	12:03_x000D_ 【北信源：公司通信聚合平台-信源密信可通过ddio接口与ChatGPT快速接入】财联社2月6日电，北信源在互动平台表示，公司打造的跨终端、全方位、安全可信的通信聚合平台-信源密信可通过ddio接口与ChatGPT快速接入，创建机器人实现人机交互，如聊天机器人、智能客服等。
20230206	【江南奕帆：公司目前暂未涉及钙钛矿技术相关领域】财联社2月6日电，江南奕帆在互动平台表示，公司目前暂未涉及钙钛矿技术相关领域。	09:18_x000D_ 【江南奕帆：公司目前暂未涉及钙钛矿技术相关领域】财联社2月6日电，江南奕帆在互动平台表示，公司目前暂未涉及钙钛矿技术相关领域。
20230312	【双良节能：全资子公司获3.34亿片单晶硅片订单】财联社3月12日电，双良节能公告，全资子公司近日与亿晶光电签订了《单晶硅片购销框架合同》，约定2023年度后者将采购单晶硅片总计3.34亿片。参照最新统计的单晶硅片（210mm/150µm）均价测算，预计2023年度销售金额总计为27.39亿元（含税）。实际采购价格采取月度议价方式，故最终实现的销售金额可能随市场价格产生波动。	17:25_x000D_ 【双良节能：全资子公司获3.34亿片单晶硅片订单】财联社3月12日电，双良节能公告，全资子公司近日与亿晶光电签订了《单晶硅片购销框架合同》，约定2023年度后者将采购单晶硅片总计3.34亿片。参照最新统计的单晶硅片（210mm/150µm）均价测算，预计2023年度销售金额总计为27.39亿元（含税）。实际采购价格采取月度议价方式，故最终实现的销售金额可能随市场价格产生波动。
20230119	【阳光电源：2022年净利同比预增102%-140%】财联社1月19日电，阳光电源公告，预计2022年净利润32亿元-38亿元，同比增长102%-140%；公司光伏逆变器、储能系统、风电变流器等核心业务市场领先地位进一步加强，出货量和收入同比大幅提升。	16:26_x000D_ 【阳光电源：2022年净利同比预增102%-140%】财联社1月19日电，阳光电源公告，预计2022年净利润32亿元-38亿元，同比增长102%-140%；公司光伏逆变器、储能系统、风电变流器等核心业务市场领先地位进一步加强，出货量和收入同比大幅提升。
20230221	【湖南裕能：近期碳酸锂价格持续下行 有利于整个新能源电池行业的持续健康发展】财联社2月21日电，湖南裕能在互动平台表示，近期碳酸锂价格持续下行，有利于整个新能源电池行业的持续健康发展，但公司面临短期的挑战，公司密切关注市场行情，积极采取各种应对措施。	09:45_x000D_ 【湖南裕能：近期碳酸锂价格持续下行 有利于整个新能源电池行业的持续健康发展】财联社2月21日电，湖南裕能在互动平台表示，近期碳酸锂价格持续下行，有利于整个新能源电池行业的持续健康发展，但公司面临短期的挑战，公司密切关注市场行情，积极采取各种应对措施。
20230306	【霍莱沃：RDSim目前已可实现近亿级网格量的大规模计算】财联社3月6日电，霍莱沃接受机构调研时表示，RDSim目前已可实现近亿级网格量的大规模计算，并成功在曙光HPC超算平台上完成部署工作，实现万核以上的大规模仿真计算能力，在航空隐身、汽车雷达、整车布局等应用领域均有突破性进展。	09:14_x000D_ 【霍莱沃：RDSim目前已可实现近亿级网格量的大规模计算】财联社3月6日电，霍莱沃接受机构调研时表示，RDSim目前已可实现近亿级网格量的大规模计算，并成功在曙光HPC超算平台上完成部署工作，实现万核以上的大规模仿真计算能力，在航空隐身、汽车雷达、整车布局等应用领域均有突破性进展。
20230315	【西部超导：公司目前为我国高温超导储能装置的相关研究提供MgB2线材】财联社3月15日电，西部超导在互动平台表示，公司目前为我国高温超导储能装置的相关研究提供MgB2线材，提供的量子计算机用NbTi超导线缆性能指标已满足客户要求。	08:34_x000D_ 【西部超导：公司目前为我国高温超导储能装置的相关研究提供MgB2线材】财联社3月15日电，西部超导在互动平台表示，公司目前为我国高温超导储能装置的相关研究提供MgB2线材，提供的量子计算机用NbTi超导线缆性能指标已满足客户要求。
20230111	【主力资金监控：广发证券遭净卖出近4亿元】财联社1月11日电，财联社星矿数据显示，今日早盘主力资金净流入煤炭、房地产、天然气等板块，净流出汽车、大金融、证券等板块，其中净流出汽车板块超8亿元。个股方面，兆易创新上涨，主力资金净买入3.01亿元，长电科技、中兴通讯、国光电器获主力资金净流入居前；广发证券遭净卖出近4亿元，黑芝麻、久其软件、北汽蓝谷主力资金净流出额居前。	10:56_x000D_ 【主力资金监控：广发证券遭净卖出近4亿元】财联社1月11日电，财联社星矿数据显示，今日早盘主力资金净流入煤炭、房地产、天然气等板块，净流出汽车、大金融、证券等板块，其中净流出汽车板块超8亿元。个股方面，兆易创新上涨，主力资金净买入3.01亿元，长电科技、中兴通讯、国光电器获主力资金净流入居前；广发证券遭净卖出近4亿元，黑芝麻、久其软件、北汽蓝谷主力资金净流出额居前。
20230227	【东方生物业绩快报：2022年净利润同比下降39%】财联社2月27日电，东方生物发布业绩快报，2022年净利润29.8亿元，同比下降39.43%。	16:45_x000D_ 【东方生物业绩快报：2022年净利润同比下降39%】财联社2月27日电，东方生物发布业绩快报，2022年净利润29.8亿元，同比下降39.43%。
20230601	【禾信仪器：昆山国科拟减持不超2%公司股份】财联社6月1日电，禾信仪器公告，股东昆山国科拟减持不超过2%的公司股份。	16:43:19_x000D_ 【禾信仪器：昆山国科拟减持不超2%公司股份】财联社6月1日电，禾信仪器公告，股东昆山国科拟减持不超过2%的公司股份。
20230607	【安利股份：与苹果合作稳定有序 有新项目处于开发合作阶段】财联社6月7日电，安利股份在互动平台表示，公司主营产品生态功能性聚氨酯合成革和复合材料，现部分国内外品牌客户正积极开发应用于电子产品领域。公司与苹果合作稳定有序，有新项目处于开发合作阶段，但基于保密性原则，公司并不能完全获悉产品具体用于客户的何种终端产品，涉及具体客户或项目的问题不便披露。	12:54:39_x000D_ 【安利股份：与苹果合作稳定有序 有新项目处于开发合作阶段】财联社6月7日电，安利股份在互动平台表示，公司主营产品生态功能性聚氨酯合成革和复合材料，现部分国内外品牌客户正积极开发应用于电子产品领域。公司与苹果合作稳定有序，有新项目处于开发合作阶段，但基于保密性原则，公司并不能完全获悉产品具体用于客户的何种终端产品，涉及具体客户或项目的问题不便披露。
20230905	【乐普医疗：司美格鲁肽生物类似药已完成中试生产验证 预计明年一季度申报IND】财联社9月5日电，乐普医疗在互动平台表示，公司司美格鲁肽生物类似药已完成中试生产验证，预计明年一季度申报 IND，用于治疗糖尿病及肥胖患者。公司与上海民为生物技术有限公司达成里程碑条件的控股协议。该公司自主研发的GLP-1/GCGR/GIP-Fc融合蛋白MWN101获得国家药品监督管理局药品审评中心（CDE）临床许可，获批适应症为拟用于II型糖尿病和肥胖治疗，正在进行临床I期研究。	18:53:19_x000D_ 【乐普医疗：司美格鲁肽生物类似药已完成中试生产验证 预计明年一季度申报IND】财联社9月5日电，乐普医疗在互动平台表示，公司司美格鲁肽生物类似药已完成中试生产验证，预计明年一季度申报 IND，用于治疗糖尿病及肥胖患者。公司与上海民为生物技术有限公司达成里程碑条件的控股协议。该公司自主研发的GLP-1/GCGR/GIP-Fc融合蛋白MWN101获得国家药品监督管理局药品审评中心（CDE）临床许可，获批适应症为拟用于II型糖尿病和肥胖治疗，正在进行临床I期研究。
20230911	【隆基绿能：公司对BC类电池技术的三个方向都有研究】财联社9月11日电，隆基绿能在业绩说明会上表示，针对BC类电池技术，目前公司研究的方向有三个，包括HBC技术和类似以TOPCon为基础演变的技术，N型BC以及公司现在投产的HPBC技术。公司对这三个方向都有比较系统和深入的研究，也都有相应的中试线。总体来讲，公司认为BC是相对确定的技术方向，且将会快速在市场获得优势。在这三条BC路线中，具体哪种路线最终具有更大的优势，目前公司认为各有其竞争力。	21:06:06_x000D_ 【隆基绿能：公司对BC类电池技术的三个方向都有研究】财联社9月11日电，隆基绿能在业绩说明会上表示，针对BC类电池技术，目前公司研究的方向有三个，包括HBC技术和类似以TOPCon为基础演变的技术，N型BC以及公司现在投产的HPBC技术。公司对这三个方向都有比较系统和深入的研究，也都有相应的中试线。总体来讲，公司认为BC是相对确定的技术方向，且将会快速在市场获得优势。在这三条BC路线中，具体哪种路线最终具有更大的优势，目前公司认为各有其竞争力。
20230303	【中信证券：稀土永磁长期成长性毋庸置疑 坚定推荐中国稀土产业链战略配置价值】财联社3月3日电，中信证券研报指出，近十年稀土永磁下游应用场景不断打开，传统需求如汽车、风电、变频空调、消费电子等稳健支撑；新兴需求如新能源车、工业节能电机、工业机器人等蓬勃发展；未来人形机器人、比亚迪易四方、永磁磁浮轨道技术等需求潜在增长点或将持续涌现。我们预计在新兴与传统需求双轮驱动下，稀土永磁长期成长性毋庸置疑，当前时点坚定推荐中国稀土产业链战略配置价值。	08:26_x000D_ 【中信证券：稀土永磁长期成长性毋庸置疑 坚定推荐中国稀土产业链战略配置价值】财联社3月3日电，中信证券研报指出，近十年稀土永磁下游应用场景不断打开，传统需求如汽车、风电、变频空调、消费电子等稳健支撑；新兴需求如新能源车、工业节能电机、工业机器人等蓬勃发展；未来人形机器人、比亚迪易四方、永磁磁浮轨道技术等需求潜在增长点或将持续涌现。我们预计在新兴与传统需求双轮驱动下，稀土永磁长期成长性毋庸置疑，当前时点坚定推荐中国稀土产业链战略配置价值。
20230410	【东方材料回应华为深夜声明：会与各方沟通收购TD TECH 51%股权事宜】财联社4月10日电，东方材料昨日晚间公告拟定增募资不超20亿元，用于向诺基亚全资子公司NSN收购TD TECH 51%股权（交易对价21.22亿元）。TD TECH剩余49%股权由华为持有，华为昨日深夜发布声明，没有任何意愿及可能与东方材料合资运营TD TECH。4月10日，记者致电东方材料相关负责人，其表示会与各方沟通，后续事项以公告为准。对于启动收购前是否与华为有过接洽，公司未回复。 (证券时报)	09:10:23_x000D_ 【东方材料回应华为深夜声明：会与各方沟通收购TD TECH 51%股权事宜】财联社4月10日电，东方材料昨日晚间公告拟定增募资不超20亿元，用于向诺基亚全资子公司NSN收购TD TECH 51%股权（交易对价21.22亿元）。TD TECH剩余49%股权由华为持有，华为昨日深夜发布声明，没有任何意愿及可能与东方材料合资运营TD TECH。4月10日，记者致电东方材料相关负责人，其表示会与各方沟通，后续事项以公告为准。对于启动收购前是否与华为有过接洽，公司未回复。 (证券时报)
20230605	07:17 _x000D_ [[+_+]]_x000D_ 专享 专享_x000D_ 【研选】微软正在针对Office365测试AI功能，并向客户多收取至少40%的费用，国产办公应用天花板有望显著抬高；国资云引领云行业高速发展，分析师看好公司	07:17 _x000D_ [[+_+]]_x000D_ 专享 专享_x000D_ 【研选】微软正在针对Office365测试AI功能，并向客户多收取至少40%的费用，国产办公应用天花板有望显著抬高；国资云引领云行业高速发展，分析师看好公司作为供应商持续受益于移动云增长 解锁直达>>
20230627	12:09 _x000D_ [[+_+]]_x000D_ 专享 专享_x000D_ 【大佬持仓跟踪】人工智能+数据要素+时空大数据，已应用人工智能技术开发数据相关应用软件，这家企业掌握多源数据并参股大数据交易公司，另一参股公司参与了近百家企	12:09 _x000D_ [[+_+]]_x000D_ 专享 专享_x000D_ 【大佬持仓跟踪】人工智能+数据要素+时空大数据，已应用人工智能技术开发数据相关应用软件，这家企业掌握多源数据并参股大数据交易公司，另一参股公司参与了近百家企业数字化项目建设 解锁直达>>
20230330	【汤姆猫：开始接入测试OpenAI所提供的Embeddings等技术服务】财联社3月30日电，汤姆猫接受机构调研时表示，在OpenAI的文本预训练通识大模型基础上，公司开始接入测试OpenAI所提供的Embeddings等技术服务。除此之外，在图像模型领域，公司海外美术团队已在局部美术创作中使用AIGC相关技术Stable Diffusion进行美术创作，旨在探索减少部分重复度高且耗时的工作。同时，公司也在持续关注各类自然语言大模型、多态大模型、视觉大模型、音频大模型等发展情况。	08:42_x000D_ 【汤姆猫：开始接入测试OpenAI所提供的Embeddings等技术服务】财联社3月30日电，汤姆猫接受机构调研时表示，在OpenAI的文本预训练通识大模型基础上，公司开始接入测试OpenAI所提供的Embeddings等技术服务。除此之外，在图像模型领域，公司海外美术团队已在局部美术创作中使用AIGC相关技术Stable Diffusion进行美术创作，旨在探索减少部分重复度高且耗时的工作。同时，公司也在持续关注各类自然语言大模型、多态大模型、视觉大模型、音频大模型等发展情况。
20230830	【中航沈飞：上半年净利润同比增长33.46%】财联社8月30日电，中航沈飞披露半年度报告，上半年实现营业收入为231.5亿元，同比增长16.85%；归母净利润14.93亿元，同比增长33.46%；基本每股收益0.54元。	19:30:07_x000D_ 【中航沈飞：上半年净利润同比增长33.46%】财联社8月30日电，中航沈飞披露半年度报告，上半年实现营业收入为231.5亿元，同比增长16.85%；归母净利润14.93亿元，同比增长33.46%；基本每股收益0.54元。
20230906	07:18 _x000D_ [[+_+]]_x000D_ 专享 专享_x000D_ 【研选】华力创通公告芯片类产品订单，分析师上调相关产品销量预期，看好产业链公司有望受益；这家公司积极布局新型电池技术，有望持续享受行业技术变革带来的超额收益	07:18 _x000D_ [[+_+]]_x000D_ 专享 专享_x000D_ 【研选】华力创通公告芯片类产品订单，分析师上调相关产品销量预期，看好产业链公司有望受益；这家公司积极布局新型电池技术，有望持续享受行业技术变革带来的超额收益 解锁直达>>
20230223	【周鸿祎：ChatGPT可能两三年内就会产生自我意识威胁人类】财联社2月23日电，360创始人周鸿祎今日接受采访时，再次提到大热的聊天机器人ChatGPT。“ChatGPT可能在2-3年内就会产生自我意识威胁人类。”在采访现场，周鸿祎“语出惊人”。他提到，任何行业的APP、软件、网站、应用，如果加持上GPT的能力，都值得重塑一遍。“不要把它当成一个媒体工具、搜索引擎、聊天机器人，这都有点把它看的太小儿科了。” (澎湃新闻)	12:33_x000D_ 【周鸿祎：ChatGPT可能两三年内就会产生自我意识威胁人类】财联社2月23日电，360创始人周鸿祎今日接受采访时，再次提到大热的聊天机器人ChatGPT。“ChatGPT可能在2-3年内就会产生自我意识威胁人类。”在采访现场，周鸿祎“语出惊人”。他提到，任何行业的APP、软件、网站、应用，如果加持上GPT的能力，都值得重塑一遍。“不要把它当成一个媒体工具、搜索引擎、聊天机器人，这都有点把它看的太小儿科了。” (澎湃新闻)
20230704	【富瀚微：公司SoC芯片可实现与各种大模型接入】财联社7月4日电，富瀚微在互动平台表示，公司SoC芯片可实现与各种大模型接入，为多种方式与客户合作打下良好基础。	12:57:56_x000D_ 【富瀚微：公司SoC芯片可实现与各种大模型接入】财联社7月4日电，富瀚微在互动平台表示，公司SoC芯片可实现与各种大模型接入，为多种方式与客户合作打下良好基础。
20230717	2023.07.16 星期日 21:33 _x000D_ [[+_+]]_x000D_ 专享 专享_x000D_ 【风口研报·洞察】最高层再度发出高度重视网安与信息化信号，在AI监管+数据要素+网络安全三位一体大趋势下，不同场景安全需求涌现	2023.07.16 星期日 21:33 _x000D_ [[+_+]]_x000D_ 专享 专享_x000D_ 【风口研报·洞察】最高层再度发出高度重视网安与信息化信号，在AI监管+数据要素+网络安全三位一体大趋势下，不同场景安全需求涌现，经分析师梳理行业内部分公司中报预期乐观；北上资金流入 哪些行业最受益 解锁直达>>
20230317	【博汇股份：公司部分生产装置复产】财联社3月17日电，博汇股份公告，3月3日，公司40万吨/年环保芳烃油生产装置已完成法定检验工作，经各项生产准备后，结合有关政府部门要求，该装置于3月15日起全面有序恢复生产。	18:47_x000D_ 【博汇股份：公司部分生产装置复产】财联社3月17日电，博汇股份公告，3月3日，公司40万吨/年环保芳烃油生产装置已完成法定检验工作，经各项生产准备后，结合有关政府部门要求，该装置于3月15日起全面有序恢复生产。
20230317	10:39 _x000D_ [[+_+]]_x000D_ 专享 专享_x000D_ 【盘中宝】半导体设备皇冠明珠，零件单个价值量高，技术难度大，这家公司向上海微电子提供光刻机核心器件 解锁直达>>	10:39 _x000D_ [[+_+]]_x000D_ 专享 专享_x000D_ 【盘中宝】半导体设备皇冠明珠，零件单个价值量高，技术难度大，这家公司向上海微电子提供光刻机核心器件 解锁直达>>
20230827	【财政部、税务总局：自2023年8月28日起 证券交易印花税实施减半征收】财联社8月27日电，财政部、税务总局公告，为活跃资本市场、提振投资者信心，自2023年8月28日起，证券交易印花税实施减半征收。	17:09:05_x000D_ 【财政部、税务总局：自2023年8月28日起 证券交易印花税实施减半征收】财联社8月27日电，财政部、税务总局公告，为活跃资本市场、提振投资者信心，自2023年8月28日起，证券交易印花税实施减半征收。
20230911	【罗博特科：签署1.1亿元日常经营重大合同】财联社9月11日电，罗博特科公告，9月9日公司与弘元绿能的控股子公司弘元光能（包头）有限公司签署的单笔合同金额约为1.1亿元人民币（含税），占公司2022年度经审计营业收入的比例约为12.35%。	16:00:59_x000D_ 【罗博特科：签署1.1亿元日常经营重大合同】财联社9月11日电，罗博特科公告，9月9日公司与弘元绿能的控股子公司弘元光能（包头）有限公司签署的单笔合同金额约为1.1亿元人民币（含税），占公司2022年度经审计营业收入的比例约为12.35%。
20230516	【云从科技计划打造国产游戏行业大模型 将与游族网络达成合作】财联社5月16日电，云从科技5月18日将在广州举办“AI赋能数字中国产业论坛暨2023云从科技人机协同发布会”。据云从科技相关负责人透露，此次大会上，云从科技将官宣与多家公司签约行业大模型合作，尤其是游戏领域，云从科技将与全球化研运一体的游戏公司游族网络达成合作，双方将共同致力于针对游戏行业的人工智能大模型技术研究及应用实践。 (证券时报)	21:00:31_x000D_ 【云从科技计划打造国产游戏行业大模型 将与游族网络达成合作】财联社5月16日电，云从科技5月18日将在广州举办“AI赋能数字中国产业论坛暨2023云从科技人机协同发布会”。据云从科技相关负责人透露，此次大会上，云从科技将官宣与多家公司签约行业大模型合作，尤其是游戏领域，云从科技将与全球化研运一体的游戏公司游族网络达成合作，双方将共同致力于针对游戏行业的人工智能大模型技术研究及应用实践。 (证券时报)
20230503	【2023五一档票房破15亿】财联社5月3日电，据猫眼专业版数据，5月3日19时，2023五一档期总票房破15亿，《人生路不熟》《长空之王》《这么多年》分列前三位。	19:52:19_x000D_ 【2023五一档票房破15亿】财联社5月3日电，据猫眼专业版数据，5月3日19时，2023五一档期总票房破15亿，《人生路不熟》《长空之王》《这么多年》分列前三位。
20230518	【华宇软件：法律大语言模型预计下半年会陆续交付客户运行】财联社5月18日电，华宇软件在互动平台表示，公司即将推出垂直法律专业领域的法律大语言模型，定位是面向行业垂直领域的场景和用户，目前处于小范围客户内测阶段，预计今年下半年会陆续交付客户运行。	17:35:11_x000D_ 【华宇软件：法律大语言模型预计下半年会陆续交付客户运行】财联社5月18日电，华宇软件在互动平台表示，公司即将推出垂直法律专业领域的法律大语言模型，定位是面向行业垂直领域的场景和用户，目前处于小范围客户内测阶段，预计今年下半年会陆续交付客户运行。
20230711	【消息人士：万达商管已汇出足额资金兑付7月10日到期的15.75亿元中票】财联社7月11日电，从消息人士处获悉，大连万达商业管理集团已将用于兑付7月10日到期的“20大连万达MTN003”15.75亿元中票的足额资金汇至上海清算交易所。资料显示，“20大连万达MTN003”发行规模为50亿元，票面利率为5.2%，该笔票据在2022年7月11日行使发行人调整票息及持有人回售权利，票面利率随后调整为6.6%，剩余待偿还本金为15.75亿元。 (澎湃新闻)	07:24:04_x000D_ 【消息人士：万达商管已汇出足额资金兑付7月10日到期的15.75亿元中票】财联社7月11日电，从消息人士处获悉，大连万达商业管理集团已将用于兑付7月10日到期的“20大连万达MTN003”15.75亿元中票的足额资金汇至上海清算交易所。资料显示，“20大连万达MTN003”发行规模为50亿元，票面利率为5.2%，该笔票据在2022年7月11日行使发行人调整票息及持有人回售权利，票面利率随后调整为6.6%，剩余待偿还本金为15.75亿元。 (澎湃新闻)
20230822	【新华保险：董事长李全因年龄原因辞职】财联社8月22日电，新华保险公告，李全先生因年龄原因，辞去本公司董事长、执行董事、首席执行官、董事会战略委员会主任委员、投资委员会委员、风险管理与消费者权益保护委员会委员及其他一切职务。	16:39:15_x000D_ 【新华保险：董事长李全因年龄原因辞职】财联社8月22日电，新华保险公告，李全先生因年龄原因，辞去本公司董事长、执行董事、首席执行官、董事会战略委员会主任委员、投资委员会委员、风险管理与消费者权益保护委员会委员及其他一切职务。
20230906	【银轮股份：浸没式液冷设备目前处在客户验证阶段】财联社9月6日电，银轮股份在互动平台表示，公司已开发成功数据中心服务器浸没式液冷设备，目前处在客户验证阶段。	14:24:24_x000D_ 【银轮股份：浸没式液冷设备目前处在客户验证阶段】财联社9月6日电，银轮股份在互动平台表示，公司已开发成功数据中心服务器浸没式液冷设备，目前处在客户验证阶段。
20230109	【金新农：2022年生猪收入18.19亿元 同比减少10.71%】财联社1月9日电，金新农公告，公司2022年12月生猪销量合计3.91万头，销售收入合计7362.88万元，生猪销售均价21.43元/公斤（剔除仔猪、种猪影响后商品猪均价为19.77元/公斤），生猪销量、销售收入和销售均价环比变动分别为-69.75%、-71.64%和-18.52%，同比变动分别为-81.01%、-71.03%和22.74%。2022年1-12月，公司累计销售生猪125.64万头，累计销售收入18.19亿元，分别比去年同期增长17.55%、-10.71%。	19:07_x000D_ 【金新农：2022年生猪收入18.19亿元 同比减少10.71%】财联社1月9日电，金新农公告，公司2022年12月生猪销量合计3.91万头，销售收入合计7362.88万元，生猪销售均价21.43元/公斤（剔除仔猪、种猪影响后商品猪均价为19.77元/公斤），生猪销量、销售收入和销售均价环比变动分别为-69.75%、-71.64%和-18.52%，同比变动分别为-81.01%、-71.03%和22.74%。2022年1-12月，公司累计销售生猪125.64万头，累计销售收入18.19亿元，分别比去年同期增长17.55%、-10.71%。
20230801	【映翰通：AI智能开门柜产品已形成批量销售】财联社8月1日电，映翰通近期接受投资者调研时称，公司根据市场跟踪，确定了智能零售机器AI方案的方向，公司已经推出了AI智能开门柜产品，目前已经形成批量销售。	19:33:20_x000D_ 【映翰通：AI智能开门柜产品已形成批量销售】财联社8月1日电，映翰通近期接受投资者调研时称，公司根据市场跟踪，确定了智能零售机器AI方案的方向，公司已经推出了AI智能开门柜产品，目前已经形成批量销售。
20230813	18:31 _x000D_ [[+_+]]_x000D_ 专享 专享_x000D_ 【电报解读】数据要素相关政策将加快出台，未来行业市场空间或近2000亿，这家企业已基于AI技术构建了两大数据库 解锁直达>>	18:31 _x000D_ [[+_+]]_x000D_ 专享 专享_x000D_ 【电报解读】数据要素相关政策将加快出台，未来行业市场空间或近2000亿，这家企业已基于AI技术构建了两大数据库 解锁直达>>
20230608	【海德股份：拟与长城股权基金等设立合伙企业开展个贷不良业务】财联社6月8日电，海德股份公告，公司全资子公司海徳资管、长城股权基金、维思德投资及芜湖长城投资中心签署《芜湖长城维海投资中心（有限合伙）有限合伙协议》（简称《合伙协议》），共同成立芜湖长城维海投资中心（有限合伙），开展个人信用类不良债权收购与处置业务。海徳资管作为劣后级有限合伙人出资2400万元，出资比例约30%，其他合伙人合计出资5600.0001万元，出资比例约70%。	17:21:08_x000D_ 【海德股份：拟与长城股权基金等设立合伙企业开展个贷不良业务】财联社6月8日电，海德股份公告，公司全资子公司海徳资管、长城股权基金、维思德投资及芜湖长城投资中心签署《芜湖长城维海投资中心（有限合伙）有限合伙协议》（简称《合伙协议》），共同成立芜湖长城维海投资中心（有限合伙），开展个人信用类不良债权收购与处置业务。海徳资管作为劣后级有限合伙人出资2400万元，出资比例约30%，其他合伙人合计出资5600.0001万元，出资比例约70%。
20230705	【6月财新中国服务业PMI降至53.9 连续六个月扩张】财联社7月5日电，6月财新中国服务业PMI录得53.9，较前月回落3.2个百分点，已经连续六个月位于扩张区间，不过为六个月次低，仅高于2023年1月。6月财新中国综合PMI下降3.1个百分点至52.5。	09:45:35_x000D_ 【6月财新中国服务业PMI降至53.9 连续六个月扩张】财联社7月5日电，6月财新中国服务业PMI录得53.9，较前月回落3.2个百分点，已经连续六个月位于扩张区间，不过为六个月次低，仅高于2023年1月。6月财新中国综合PMI下降3.1个百分点至52.5。
20230723	【银河微电：入选国家级第五批专精特新“小巨人”企业名单】财联社7月23日电，银河微电公告，公司入选国家级“第五批专精特新‘小巨人’企业公示名单”，入选名单的公示期已结束。	15:48:23_x000D_ 【银河微电：入选国家级第五批专精特新“小巨人”企业名单】财联社7月23日电，银河微电公告，公司入选国家级“第五批专精特新‘小巨人’企业公示名单”，入选名单的公示期已结束。
20230901	【深交所：对程序化交易实施报告管理 未经报告的投资者不得进行程序化交易】财联社9月1日电，深交所表示，本所对程序化交易实施报告管理，未经报告的投资者不得进行程序化交易。会员应当加强自身及其客户程序化交易行为的管理，对可能严重影响市场价格和流动性的指令加强监控，及时识别、管理和报告客户涉嫌异常交易的行为。客户程序化交易可能影响交易系统安全或者正常交易秩序的，会员可以采取拒绝其程序化交易委托、撤销相关申报等措施。	18:19:44_x000D_ 【深交所：对程序化交易实施报告管理 未经报告的投资者不得进行程序化交易】财联社9月1日电，深交所表示，本所对程序化交易实施报告管理，未经报告的投资者不得进行程序化交易。会员应当加强自身及其客户程序化交易行为的管理，对可能严重影响市场价格和流动性的指令加强监控，及时识别、管理和报告客户涉嫌异常交易的行为。客户程序化交易可能影响交易系统安全或者正常交易秩序的，会员可以采取拒绝其程序化交易委托、撤销相关申报等措施。
20230627	【午间公告】财联社6月27日电，多家公司发布午间公告，具体如下：①长亮科技：向特定对象发行股票申请获深交所受理。②浙江交科：为进一步增强子公司浙江交工权益资本实力，公司及全资子公司交科建投拟对浙江交工增加注册资本10亿元。其中，公司出资9.999亿元，交科建投出资0.001亿元。③龙源技术：近期收到山东省住房和城乡建设厅颁发的建筑企业资质证书。	12:00:06_x000D_ 【午间公告】财联社6月27日电，多家公司发布午间公告，具体如下：_x000D_ _x000D_ ①长亮科技：向特定对象发行股票申请获深交所受理。_x000D_ _x000D_ ②浙江交科：为进一步增强子公司浙江交工权益资本实力，公司及全资子公司交科建投拟对浙江交工增加注册资本10亿元。其中，公司出资9.999亿元，交科建投出资0.001亿元。_x000D_ _x000D_ ③龙源技术：近期收到山东省住房和城乡建设厅颁发的建筑企业资质证书。
20230219	【瑞纳智能：平台可调取公司研发团队基于人工智能技术形成的AI算法模型】财联社2月19日电，瑞纳智能近日接受机构调研表示，公司数据主要来源于供热现场的各种设备，如超声波热量表、智能模块化换热机组、智能水力平衡装置、智能温控阀等，在运行期间实时地通过智能物联数据终端将运行数据上传到公司智慧供热管理平台。平台可以调取公司研发团队基于人工智能技术和多年行业经验形成的AI算法模型。	21:56_x000D_ 【瑞纳智能：平台可调取公司研发团队基于人工智能技术形成的AI算法模型】财联社2月19日电，瑞纳智能近日接受机构调研表示，公司数据主要来源于供热现场的各种设备，如超声波热量表、智能模块化换热机组、智能水力平衡装置、智能温控阀等，在运行期间实时地通过智能物联数据终端将运行数据上传到公司智慧供热管理平台。平台可以调取公司研发团队基于人工智能技术和多年行业经验形成的AI算法模型。
20230405	财联社4月5日电，瑞银将2024年3月底的黄金目标价从2100美元/盎司上调至2200美元/盎司。	22:56:16_x000D_ 财联社4月5日电，瑞银将2024年3月底的黄金目标价从2100美元/盎司上调至2200美元/盎司。
20230619	【恒勃股份：公司目前业务暂未应用人工智能领域】财联社6月19日电，恒勃股份在互动平台表示，公司在新能源车领域的产品应用正逐步拓宽，公司已量产应用于PHEV车型的进气系统零部件，并获得客户纯电动汽车的冷却系统零部件订单。公司目前业务暂未应用人工智能领域。	09:09:09_x000D_ 【恒勃股份：公司目前业务暂未应用人工智能领域】财联社6月19日电，恒勃股份在互动平台表示，公司在新能源车领域的产品应用正逐步拓宽，公司已量产应用于PHEV车型的进气系统零部件，并获得客户纯电动汽车的冷却系统零部件订单。公司目前业务暂未应用人工智能领域。
20230114	财联社1月14日电，美国能源安全特使Hochstein表示，如果需要，美国可以从储备中出售更多石油。	15:28_x000D_ 财联社1月14日电，美国能源安全特使Hochstein表示，如果需要，美国可以从储备中出售更多石油。
20230427	【福昕软件：公司海外版云产品PDF Editor Cloud已集成AIGC技术】财联社4月27日电，福昕软件披露股票交易异常波动的公告，公司海外版云产品PDF Editor Cloud已集成AIGC技术，可实现PDF文档总结、内容改写、实时问答等智能文档服务功能。前述新增的AIGC功能现未单独定价，且集成后的PDF Editor Cloud产品也并未调整现行价格。目前公司对现有产品集成AIGC技术后的商业模式仍在探索中。	18:12:35_x000D_ 【福昕软件：公司海外版云产品PDF Editor Cloud已集成AIGC技术】财联社4月27日电，福昕软件披露股票交易异常波动的公告，公司海外版云产品PDF Editor Cloud已集成AIGC技术，可实现PDF文档总结、内容改写、实时问答等智能文档服务功能。前述新增的AIGC功能现未单独定价，且集成后的PDF Editor Cloud产品也并未调整现行价格。目前公司对现有产品集成AIGC技术后的商业模式仍在探索中。
20230410	【中兴商业：一季度净利预增15.93%-36.54%】财联社4月10日电，中兴商业公告，预计2023年一季度归母净利2250万元-2650万元，同比增长15.93%-36.54%。2023年以来，随着经济持续复苏，消费市场预期加快好转，客流逐渐回升。2023年第一季度，公司积极拓展营销渠道，持续优化内部管理，扩销增效取得较好效果，使销售收入、净利润同比实现较大幅度增长。	16:10:16_x000D_ 【中兴商业：一季度净利预增15.93%-36.54%】财联社4月10日电，中兴商业公告，预计2023年一季度归母净利2250万元-2650万元，同比增长15.93%-36.54%。2023年以来，随着经济持续复苏，消费市场预期加快好转，客流逐渐回升。2023年第一季度，公司积极拓展营销渠道，持续优化内部管理，扩销增效取得较好效果，使销售收入、净利润同比实现较大幅度增长。
20230224	【韩建河山：收到3.07亿元项目合同】财联社2月24日电，韩建河山公告，此前披露，公司和山西水建管业有限公司联合体（公司为该联合体牵头人）中标“山西省小浪底引黄工程（灌区、工业及城镇生活供水部分）PCCP管材采购001标段”，公司于2023年2月24日收到了山西小浪底引黄水务有限公司与联合体双方签字盖章的管材采购合同，签约合同价为3.07亿元（含税）。	17:20_x000D_ 【韩建河山：收到3.07亿元项目合同】财联社2月24日电，韩建河山公告，此前披露，公司和山西水建管业有限公司联合体（公司为该联合体牵头人）中标“山西省小浪底引黄工程（灌区、工业及城镇生活供水部分）PCCP管材采购001标段”，公司于2023年2月24日收到了山西小浪底引黄水务有限公司与联合体双方签字盖章的管材采购合同，签约合同价为3.07亿元（含税）。
20230202	【金石亚药：目前公司主要产品在个别渠道仍存在供货紧张情况】财联社2月2日电，金石亚药接受机构调研时表示，疫情政策放开初期，为全力保障产品供应，公司相关生产线开启满负荷生产模式。截至目前，公司各项生产运营均正常推进。后期公司将视疫情发展情况及市场需求，制定及实施生产计划。产品市场供应方面，在目前的疫情发展情况及市场需求下，公司主要产品在个别渠道仍存在供货紧张情况。	19:56_x000D_ 【金石亚药：目前公司主要产品在个别渠道仍存在供货紧张情况】财联社2月2日电，金石亚药接受机构调研时表示，疫情政策放开初期，为全力保障产品供应，公司相关生产线开启满负荷生产模式。截至目前，公司各项生产运营均正常推进。后期公司将视疫情发展情况及市场需求，制定及实施生产计划。产品市场供应方面，在目前的疫情发展情况及市场需求下，公司主要产品在个别渠道仍存在供货紧张情况。
20230703	12:54 _x000D_ [[+_+]]_x000D_ 专享 专享_x000D_ 【机构调研】这家本土操作系统龙头服务器产品已上架华为云云商店 解锁直达>>	12:54 _x000D_ [[+_+]]_x000D_ 专享 专享_x000D_ 【机构调研】这家本土操作系统龙头服务器产品已上架华为云云商店 解锁直达>>
20230710	【金发拉比：实控人之一林浩亮拟减持公司不超6%股份】财联社7月10日电，金发拉比公告，持股27.29%的公司大股东之一林浩亮拟减持不超过6%的公司股份。此次减持计划实施完毕后，林浩亮仍是公司的控股股东、实际控制人之一。	16:30:19_x000D_ 【金发拉比：实控人之一林浩亮拟减持公司不超6%股份】财联社7月10日电，金发拉比公告，持股27.29%的公司大股东之一林浩亮拟减持不超过6%的公司股份。此次减持计划实施完毕后，林浩亮仍是公司的控股股东、实际控制人之一。
20230418	【富吉瑞：部分产品运用到无人机等领域 公司产品有使用AI人工智能等技术】财联社4月18日电，富吉瑞在互动平台表示，公司的主要产品为机芯、热像仪和光电系统等。红外产品可以作为无人机的重要成像部件，目前公司的部分产品也运用到了无人机等领域。公司产品有使用AI人工智能(目标分类、图像识别等)等技术，但目前公司的产品未运用于AI人工智能、半导体集成电路的产品上。	17:50:53_x000D_ 【富吉瑞：部分产品运用到无人机等领域 公司产品有使用AI人工智能等技术】财联社4月18日电，富吉瑞在互动平台表示，公司的主要产品为机芯、热像仪和光电系统等。红外产品可以作为无人机的重要成像部件，目前公司的部分产品也运用到了无人机等领域。公司产品有使用AI人工智能(目标分类、图像识别等)等技术，但目前公司的产品未运用于AI人工智能、半导体集成电路的产品上。
20230206	13:48 _x000D_ [[+_+]]_x000D_ 专享 专享_x000D_ 【盘中宝】推动北京数据特区建设，数据要素市场化进程有望提速，产业链这几个领域或迎机遇，这几家公司已在北京开展相关业务 解锁直达>>	13:48 _x000D_ [[+_+]]_x000D_ 专享 专享_x000D_ 【盘中宝】推动北京数据特区建设，数据要素市场化进程有望提速，产业链这几个领域或迎机遇，这几家公司已在北京开展相关业务 解锁直达>>
20230201	财联社2月1日电，据中央纪委国家监委驻中国建设银行纪检监察组、山东省纪委监委消息，中国建设银行深圳市分行原行长王业被“双开”。	18:07_x000D_ 财联社2月1日电，据中央纪委国家监委驻中国建设银行纪检监察组、山东省纪委监委消息，中国建设银行深圳市分行原行长王业被“双开”。
20230227	【佛慈制药：实际控制人将由兰州市国资委变更为甘肃省国资委 股票明起复牌】财联社2月27日电，佛慈制药公告，甘肃国投拟受让佛慈集团100%股权及由此衍生的所有股东权益；佛慈集团为公司的控股股东，持有公司已发行股份的61.63%。如本次交易完成后，甘肃国投成为佛慈集团控股股东，通过佛慈集团间接拥有佛慈制药已发行股份的61.63%。公司实际控制人将由兰州市国资委变更为甘肃省国资委。公司股票2月28日开市起复牌。	16:58_x000D_ 【佛慈制药：实际控制人将由兰州市国资委变更为甘肃省国资委 股票明起复牌】财联社2月27日电，佛慈制药公告，甘肃国投拟受让佛慈集团100%股权及由此衍生的所有股东权益；佛慈集团为公司的控股股东，持有公司已发行股份的61.63%。如本次交易完成后，甘肃国投成为佛慈集团控股股东，通过佛慈集团间接拥有佛慈制药已发行股份的61.63%。公司实际控制人将由兰州市国资委变更为甘肃省国资委。公司股票2月28日开市起复牌。
20230119	财联社1月18日电，中概直播概念股走低，斗鱼跌超5%，微博、虎牙跌近3%。	23:48_x000D_ 财联社1月18日电，中概直播概念股走低，斗鱼跌超5%，微博、虎牙跌近3%。
20230829	【盛屯矿业：上半年净利润同比下降78.32%】财联社8月29日电，盛屯矿业披露半年报，上半年净利润1.64亿元，同比下降78.32%。	18:43:36_x000D_ 【盛屯矿业：上半年净利润同比下降78.32%】财联社8月29日电，盛屯矿业披露半年报，上半年净利润1.64亿元，同比下降78.32%。
20230908	【中电港：公开征集拟转让股权的潜在受让方】财联社9月8日电，中电港公告，拟通过北京产权交易所公开挂牌方式转让所持广东艾矽易信息科技有限公司100%股权事项进行正式挂牌前的信息预披露，公开征集拟转让股权的潜在受让方。	17:20:54_x000D_ 【中电港：公开征集拟转让股权的潜在受让方】财联社9月8日电，中电港公告，拟通过北京产权交易所公开挂牌方式转让所持广东艾矽易信息科技有限公司100%股权事项进行正式挂牌前的信息预披露，公开征集拟转让股权的潜在受让方。
20230317	【伯特利：与北美某著名整车厂新签署关于某一平台项目】财联社3月17日电，伯特利公告，伯特利墨西哥公司与北美某著名整车厂新签署关于某一平台项目，包含铸铝前转向节、铸铝后转向节产品的4份供货合同；伯特利预测本次签署的全部供货车型单年度最高产量约30万辆，项目车型的生命周期内（2025年-2031年）产品销售收入累计预计约31亿元人民币。	18:30_x000D_ 【伯特利：与北美某著名整车厂新签署关于某一平台项目】财联社3月17日电，伯特利公告，伯特利墨西哥公司与北美某著名整车厂新签署关于某一平台项目，包含铸铝前转向节、铸铝后转向节产品的4份供货合同；伯特利预测本次签署的全部供货车型单年度最高产量约30万辆，项目车型的生命周期内（2025年-2031年）产品销售收入累计预计约31亿元人民币。
20230317	【宁德时代：今年公司整体的定价策略没有发生变化】财联社3月17日电，宁德时代接受机构调研时表示，今年公司整体的定价策略没有发生变化。公司希望以差异化的产品和技术帮助客户打造产品竞争力，获取更大的市场份额；例如，推进综合成本更低的钠离子电池产业化；推广巧克力换电推进10-20万元车型产品更具竞争力等。	19:53_x000D_ 【宁德时代：今年公司整体的定价策略没有发生变化】财联社3月17日电，宁德时代接受机构调研时表示，今年公司整体的定价策略没有发生变化。公司希望以差异化的产品和技术帮助客户打造产品竞争力，获取更大的市场份额；例如，推进综合成本更低的钠离子电池产业化；推广巧克力换电推进10-20万元车型产品更具竞争力等。
20230308	【知情人士：“宁王”宜春锂矿选矿厂主体预计4月份完工 配套尾矿库已施工】财联社3月8日电，财联社记者从知情人士处获悉，受天气等原因影响，宁德时代旗下枧下窝矿区选矿厂一期主体建设预期于4月份完工。另据福建水投集团公众号显示，上述选矿厂配套尾矿库工程一期排洪主洞已贯通。（财联社记者 曾楚楚 李子健）	14:11_x000D_ 【知情人士：“宁王”宜春锂矿选矿厂主体预计4月份完工 配套尾矿库已施工】财联社3月8日电，财联社记者从知情人士处获悉，受天气等原因影响，宁德时代旗下枧下窝矿区选矿厂一期主体建设预期于4月份完工。另据福建水投集团公众号显示，上述选矿厂配套尾矿库工程一期排洪主洞已贯通。（财联社记者 曾楚楚 李子健）
20230425	【上海电气：一季度净利同比增2802%】财联社4月25日电，上海电气披露一季报，一季度实现净利润3.67亿元，同比增长2802.32%；基本每股收益0.02元。报告期内，公司通过加强成本管控，部分下属企业毛利率较上年同期有所提升；同时受益于经济回暖，本期投资收益及公允价值变动收益较上年同期有所增加。	18:04:46_x000D_ 【上海电气：一季度净利同比增2802%】财联社4月25日电，上海电气披露一季报，一季度实现净利润3.67亿元，同比增长2802.32%；基本每股收益0.02元。报告期内，公司通过加强成本管控，部分下属企业毛利率较上年同期有所提升；同时受益于经济回暖，本期投资收益及公允价值变动收益较上年同期有所增加。
20230131	【北向资金今日大幅净买入101.44亿元 宁德时代净买入额居首】财联社1月31日电，北向资金今日大幅净买入101.44亿元。宁德时代、招商银行、隆基绿能分别获净买入14.05亿元、7.64亿元、6.97亿元。五粮液净卖出额居首，金额为5.0亿元。	17:30_x000D_ 【北向资金今日大幅净买入101.44亿元 宁德时代净买入额居首】财联社1月31日电，北向资金今日大幅净买入101.44亿元。宁德时代、招商银行、隆基绿能分别获净买入14.05亿元、7.64亿元、6.97亿元。五粮液净卖出额居首，金额为5.0亿元。
20230202	【沧州明珠：隔膜产品实现满产满销】财联社2月2日电，沧州明珠在互动平台表示，目前，隔膜产品实现了满产满销。	09:27_x000D_ 【沧州明珠：隔膜产品实现满产满销】财联社2月2日电，沧州明珠在互动平台表示，目前，隔膜产品实现了满产满销。
20230403	【通源环境：联合体中标3.67亿元户用分布式光伏发电二期项目（100MW）】财联社4月3日电，通源环境公告，联合体中标华能安徽分公司皖西南户用分布式光伏发电二期项目（100MW）发电项目EPC工程预招标标段包1。项目中标金额为3.67亿元。公司目前尚不具备光伏组件研发、生产的核心技术，公司从事光伏业务的延续性存在不确定性。	15:56:29_x000D_ 【通源环境：联合体中标3.67亿元户用分布式光伏发电二期项目（100MW）】财联社4月3日电，通源环境公告，联合体中标华能安徽分公司皖西南户用分布式光伏发电二期项目（100MW）发电项目EPC工程预招标标段包1。项目中标金额为3.67亿元。公司目前尚不具备光伏组件研发、生产的核心技术，公司从事光伏业务的延续性存在不确定性。
20230829	【亿纬锂能：46系大圆柱电池预计9月份开始批量生产交付】财联社8月29日电，亿纬锂能在互动平台表示，公司可转债项目在正常推进中，深交所已于5月25日受理公司可转债的发行申请。公司已完成100万支46系大圆柱电池的下线，目前已进入了量产阶段。预计今年三季度从9月份开始，会实现批量的生产交付。	18:23:59_x000D_ 【亿纬锂能：46系大圆柱电池预计9月份开始批量生产交付】财联社8月29日电，亿纬锂能在互动平台表示，公司可转债项目在正常推进中，深交所已于5月25日受理公司可转债的发行申请。公司已完成100万支46系大圆柱电池的下线，目前已进入了量产阶段。预计今年三季度从9月份开始，会实现批量的生产交付。
20230607	【郑州煤电：控股股东拟向郑州热力转让5.45%股份】财联社6月7日电，郑州煤电公告，控股股东郑煤集团拟将其持有郑州煤电的无限售条件流通股6637.1万股转让给郑州热力，占上市公司总股本的5.45%。本次股份转让的每股价格为4.52元/股，股份转让价款合计约3亿元。本次权益变动后，郑煤集团持有公司46.46%股份。	18:29:49_x000D_ 【郑州煤电：控股股东拟向郑州热力转让5.45%股份】财联社6月7日电，郑州煤电公告，控股股东郑煤集团拟将其持有郑州煤电的无限售条件流通股6637.1万股转让给郑州热力，占上市公司总股本的5.45%。本次股份转让的每股价格为4.52元/股，股份转让价款合计约3亿元。本次权益变动后，郑煤集团持有公司46.46%股份。
20230607	【凯伦股份：控股股东拟协议转让公司8.14%股份】财联社6月7日电，凯伦股份公告，公司控股股东凯伦控股拟向卢礼珺协议转让公司股份3079.2万股，占公司总股本的8.14%，转让价格14.5元/股，总价款4.46亿元。转让后，卢礼珺及其一致行动人合计持有公司股份3173.92万股，占公司总股本的8.4%。此次权益变动不会导致公司控股股东发生变化。	16:13:18_x000D_ 【凯伦股份：控股股东拟协议转让公司8.14%股份】财联社6月7日电，凯伦股份公告，公司控股股东凯伦控股拟向卢礼珺协议转让公司股份3079.2万股，占公司总股本的8.14%，转让价格14.5元/股，总价款4.46亿元。转让后，卢礼珺及其一致行动人合计持有公司股份3173.92万股，占公司总股本的8.4%。此次权益变动不会导致公司控股股东发生变化。
20230116	【铁建重工：2022年新签合同额159.46亿元 同比增长16.24%】财联社1月16日电，铁建重工公告，2022年第四季度，公司重大合同签约/中标金额（包括隧道掘进机业务、特种专业装备业务、轨道交通设备业务）合计18.98亿元，约占公司2021年营业收入的19.95%。2022年全年新签合同/中标金额合计159.46亿元，同比增长16.24%。	17:01_x000D_ 【铁建重工：2022年新签合同额159.46亿元 同比增长16.24%】财联社1月16日电，铁建重工公告，2022年第四季度，公司重大合同签约/中标金额（包括隧道掘进机业务、特种专业装备业务、轨道交通设备业务）合计18.98亿元，约占公司2021年营业收入的19.95%。2022年全年新签合同/中标金额合计159.46亿元，同比增长16.24%。

## Sheet: Report
id	报告标题	报告正文	报告url
748591453718	北新建材(000786)：收购嘉宝莉补强涂料 一体两翼战略持续深化	类别：公司_x000D_ 机构： 德邦证券股份有限公司 研究员：闫广/王逸枫 日期：2023-09-21 事件：2023 年9 月20 日，公司发布公告拟收购嘉宝莉化工集团股份有限公司控制权，并与嘉宝莉第一大股东香港世骏就股权收购事宜达成初步意向，并签署《交易条款备忘录》和《诚意金协议》，公司拟向以公司名义开立并由双方共同监管的银行账户支付1000 万元尽调诚意金，体现公司收购诚意并加快推进尽职调查及审计评估相关工作。_x000D_ _x000D_ 嘉宝莉涂料业务基础较好，收购有利于强化两翼战略。嘉宝莉成立于1993 年，经过三十年发展与沉淀，业务范围涵盖多个涂料应用领域。根据涂界，嘉宝莉目前为中国涂料10 强、全球涂料25 强企业，在全国拥有8 大生产基地。截止2022 年底嘉宝莉集团零售终端覆盖全国3000 多个县镇市场，门店超2 万家，经销商数量超4000 名，2022 年销售收入…	https://stock.finance.sina.com.cn/stock/go.php/vReport_Show/kind/company/rptid/748591453718/index.phtml
748622133733	投资策略研究：以历史为鉴 CPI负增后稳字当头	类别：策略_x000D_ 机构： 长城证券股份有限公司 研究员：汪毅 日期：2023-09-21 从历史中找寻值得借鉴的蛛丝马迹。抛开本次CPI 同比负增，从历史上看，2000 年之后中国共出现过三次CPI 同比负增长的区间，分别为2001 年11月至2002 年12 月、2009 年2 月至2009 年10 月以及2020 年11 月至2021年2 月。从基数效应角度来看，2009 年以及2020 年两次同比负增均存在去年同期同比高企的现象；而从经济基本面出发，2002 年遭遇的经济改革阵痛期可能与现在更加类似。_x000D_ _x000D_ 复盘2002，CPI 同比负增区间始末市场表现明显呈现“稳中求胜”的态势。_x000D_ _x000D_ 从行业口径观察，当时国家的中流砥柱以及政策重点发力的汽车、钢铁、公用事业、石油石化、医药生物以及交通运输在负增始末均能跑出超额收益。_x00…	https://stock.finance.sina.com.cn/stock/go.php/vReport_Show/kind/lastest/rptid/748622133733/index.phtml
748644303693	华勤技术(603296)：全域客户覆盖份额持续提升 2+N+3平台布局动能充足	类别：公司_x000D_ 机构： 中信建投证券股份有限公司 研究员：刘双锋/王天乐 日期：2023-09-21 核心观点_x000D_ _x000D_ 消费电子ODM 全球龙头，传统消费电子领域积累深厚，公司客户矩阵日益完善，包括三星、OPPO、小米、vivo、联想、华硕、宏碁、华为等多家知名品牌商，手机、PC 等传统市场占有率稳步提升；5G 和AI 技术共振带来消费端新增需求，智能穿戴/AIOT/汽车电子等新型终端应用涌现，公司依托平台化优势快速延展新型终端产品布局，打造新一轮成长曲线；公司是业界为数不多的同时有能力实现基于Arm 架构和X86 架构设计研发的企业，可提供全栈式服务器产品组合，2022 年成功导入顶尖中国互联网客户并形成AI 服务器的批量发货供应，未来有望长期受益数字化、AI 发展浪潮。公司构建起“2+N+3”平台化布局，形成多市场规模效应和软硬协同效应，正逐步实现全球…	https://stock.finance.sina.com.cn/stock/go.php/vReport_Show/kind/company/rptid/748644303693/index.phtml
748690646690	中国石化(600028)：实施2023年A股首次回购 增强股东回报	类别：公司_x000D_ 机构： 海通证券股份有限公司 研究员：邓勇/朱军军/胡歆/刘威 日期：2023-09-22 公司实施2023 年度首次回购。8 月28 日，公司发布A 股回购报告书，拟使用不低于人民币8 亿元，不超过人民币15 亿元的自有资金，以集中竞价方式回购公司发行A 股，回购价格上限不超过9.30 元/股。9 月21 日，公司本轮首次回购A 股1000 万股，购买最高价6.16 元/股、最低价6.13 元/股，回购金额6150.59 万元（不含交易费用）。_x000D_ _x000D_ 积极回购，增强股东回报。2022 年以来，公司积极回购A 股及H 股，增强股东回报。2022 年，公司回购A 股及H 股合计11.75 亿股，回购金额41.79亿元人民币；其中，回购A 股4.42 亿股，回购金额18.88 亿元人民币，回购H 股7.33 亿股，回购金额24.99 亿港元。…	https://stock.finance.sina.com.cn/stock/go.php/vReport_Show/kind/company/rptid/748690646690/index.phtml
748901813018	建筑装饰行业周报：城中村改造资金支持政策加码 部分一二线城市限购放开显成效	类别：行业_x000D_ 机构： 兴业证券股份有限公司 研究员：孟杰/童彤/郁晾 日期：2023-09-24 投资要点_x000D_ _x000D_ 城中村改造资金支持政策加码，一二线城市限购政策逐步放开，建议关注在核心城市拥有良好布局及较高市占率的设计、装饰、建筑检测评估类企业。城中村方面，本周国务院政策例行吹风会强调，抓好“金融16 条”落实，加大城中村改造、平急两用基础设施建设、保障性住房建设等金融支持。目前在城中村改造支持资金方面，除符合条件的城中村改造项目预计在明年纳入专项债范围外，银行融资方面也有望设立城中村改造专项借款予以支持，我们判断2024 年起新增专项债中投向城中村改造的比例有望上升，同时银行信贷的进一步倾斜，有助于补充城中村改造资金来源，稳健推动其进展向前。地产方面，截至9 月19 日，已有沈阳、南京、大连等11 个城市全面取消限购，同时9 月20 日广州多区放开限…	https://stock.finance.sina.com.cn/stock/go.php/vReport_Show/kind/lastest/rptid/748901813018/index.phtml
748598842482	交通运输行业周报：出行链暑运数据出炉 需求复苏持续验证	类别：行业_x000D_ 机构： 长城证券股份有限公司 研究员：罗江南 日期：2023-09-21 航空公司公布8 月数据，业绩表现超19 年同期。上市航空公司公布8 月经营数据，受疫情常态化出行管制接触叠加暑运旺季国民出行需求释放影响，8月数据整体实现较大幅度改善。国航、东航、南航、春秋、吉祥ASK 分别同比增长106.20%、99.06%、71.42%、39.90%与47.24%，RPK 分别增长135.30%、130.44%、101.19%、66.96%与83.96%，客座率为76.6%、77.6%、80.9%、92.5%与87.7%，同比增长9.5、10.6、12.0、15.0 与17.5 个百分点。整体上看，8 月环比7 月有所改善，各航司数据已恢复至2019 年的90%以上。主要系7 月已进入传统旺季，受压制的航空需求迅速释放。本月行业国内数据均超过2019 年同期，国际航线…	https://stock.finance.sina.com.cn/stock/go.php/vReport_Show/kind/lastest/rptid/748598842482/index.phtml
748729075342	美丽田园医疗健康(02373.HK)：以双美为基石 打造泛美生态	美丽田园医疗健康聚焦中国美丽与健康管理服务行业，提供传统美容服务（生美）、医疗美容服务（医美）和亚健康评估及干预服务（健康）。按2021 年收入计算，公司是中国最大的传统美容服务提供商和第四大非外科手术类医疗美容服务提供商。截至2023 年6 月底，公司旗下业务网络共有390 家门店（196 家直营店和194 家加盟店），覆盖全国105 个城市，其中约88%的直营店位于一线及新一线城市。我们预计23/24/25 年的经调整 每股基本盈利 分别为1.06 元、1.38 元和1.70 元，分别同比增长35%/30%/23%。_x000D_ 我们的目标价为17.95 港元，对应23 年16 倍PE 和24 年12 倍PE。目标价对应84%的上涨空间，首次覆盖给予买入评级。_x000D_ 泛美业带动美丽与健康管理服务市场可持续增长。根据弗若斯特沙利文分析和《2022 年新氧医美行业白皮书》的数据…	https://finance.sina.cn/stock/relnews/hk/2023-09-22/detail-imznqxqf2105436.d.html
748981593964	传媒行业研究：：MMICL支持多模态混合输入 苹果支持3A主机游戏	9月11日，继各类单一模态输入的多模态语言模型后，新加坡国立大学的华人团队最近开源了全能多模态模型NExT-GPT。该模型支持任意模态的输入和输出，可以实现文本、图像、语音和视频之间的自由转换，是第一个实现从任一模态到任一模态转换的通用多模态系统。 NExT-GPT的优势在于：1）支持任意模态的输入和输出，充分模拟了人类处理信息的能力，是向通用人工智能目标迈进的重要一步；2）通过组合优化利用现有的各类开源模块实现全能目标。 9月19日，北京大学、北京交通大学等单位或机构联合开源发布多模态大模型MMICL，在MMbench和MME榜单目前浮动排名均保持在前三位。MMICL最大的特色在于同时接受文本和图像的交错输入，它可以分析两张图像的关系，也可以从视频中提取时空信息。目前MMICL已开源两个版本，分别基于FlanT5XL和Vicuna模型，可满足商用和科研需求。MMICL拥有理解推理多幅图…	http://stock.hexun.com/2023-09-25/210362071.html
748618651066	铜陵有色(000630)：米拉多铜矿注入 老牌铜企再启航	老牌铜企，覆盖矿铜-铜冶炼-铜加工产业链。截止2021 年末，集团境内保有铜储量291万吨，2022 年公司自产铜精矿含铜5.16 万吨，阴极铜162.87 万吨，铜加工材39.09 万吨，硫酸495.38 万吨。后续拟投资建设高端铜线材产能50 万吨/年，副产硫酸170 万吨/年。_x000D_ 注入米拉多铜矿70%股权，我们预计远景公司矿铜产能由5 万吨增至25 万吨。1）收购对价低，露天铜矿储量600 万吨。公司定增56.7 亿+可转债3.3 亿+现金6.7 亿组合支付方式购买集团持股70%的中铁建铜冠，标的公司2022 年净利润为18.1 亿元，100%股权收购对价为95.3 亿元，对应PE 倍数仅5 倍。2）米拉多铜矿二期扩建后矿铜产能增至20 万吨，对应公司矿铜总产能扩至25 万吨：中铁建铜冠核心资产为米多拉铜矿（铜储量600 万吨，品位0.48%，露天开采），一期铜精矿产能…	http://stockfinance.sina.cn/stock/go.php/paper/reportid/748618651066/index.phtml?vt=4&cid=76524&node_id=76524
748873688003	机械工业行业周报：四部门发文鼓励集成电路和工业母机企业研发创新；CME预测9月挖掘机销量为1.6万台	政策：我国提高集成电路和工业母机企业研发费用加计扣除比例。根据中国政府网援引新华社消息，财政部、税务总局、国家发展改革委、工业和信息化部18 日对外发布公告称，为进一步鼓励企业研发创新，促进集成电路产业和工业母机产业高质量发展，我国将提高集成电路和工业母机企业研发费用加计扣除比例。根据公告，集成电路企业和工业母机企业开展研发活动中实际发生的研发费用，未形成无形资产计入当期损益的，在按规定据实扣除的基础上，在2023年1 月1 日至2027 年12 月31 日期间，再按照实际发生额的120%在税前扣除；形成无形资产的，在上述期间按照无形资产成本的220%在税前摊销。 锂电设备：道森股份复合铜铝箔一体机设备获诺德股份1.84 亿元订单；诺德股份拟25 亿元投建复合集流体产业园。1）根据道森股份子公司洪田科技官方微信公众号，洪田科技研发的复合铜铝箔一体机设备“卷绕磁控溅射镀膜机”（可双面镀金属…	http://stock.hexun.com/2023-09-24/210340460.html
748968215231	机床行业系列专题(三)：丝杠-核心传动部件	丝杠是数控机床核心传动元件。丝杠是将旋转运动转换成线性运动，或将扭矩转换成轴向反复作用力的传动零件，同时兼具高精度、可逆性和高效率的特点。其广泛应用于数控机床、制造设备、机器人、精密仪器等领域的传动控制系统之中。根据摩擦特性不同，可以将丝杠分为滑动丝杠、滚动丝杠（滚珠丝杠和滚柱丝杠）和静压丝杠。滚珠丝杠副主要由丝杠、滚珠和螺母组成。滚珠丝杠的主要性能参数包括精度等级、轴向间距、额定负载、导程、丝杠轴外径和长度等，其中精度等级是最重要的因素。滚珠丝杠产业链上游主要是制造滚珠丝杠副的原材料和零部件产业，下游广泛应用于机床、航空航天、汽车、冶金、工业机械、医疗等领域。滚动丝杠的未来迭代趋势是行星滚柱丝杠，主要变化是负载的传递单元使用螺纹滚柱而不是滚珠，在传动平稳性、负载能力、转速及加速度、寿命等性能方面更具备优势。全球滚柱丝杠市场未来十年预计成长至5.57 亿美元，考虑到行星滚柱丝杠能够在定位…	http://stock.hexun.com/2023-09-25/210362475.html
749031041908	昆药集团(600422)首次覆盖：百日融合顺利完成 借力三九加速拓展院外渠道	类别：公司_x000D_ 机构： 海通国际证券集团有限公司 研究员：孟科含 日期：2023-09-26 事件：公司发布2023 年半年报。23 年上半年公司实现营业收入37.71 亿元（-10.81%），收入下降主要由于商业板块业务结构持续优化及对外援助业务有所减少，归母净利润2.23 亿元（+3.12%），扣非归母净利润1.77 亿元（+22.78%）；23 年单Q2 实现营业收入18.61 亿元（-0.18%），归母净利润0.92亿元（-9.59%），扣非归母净利润0.74 亿元（+93.70%）。_x000D_ _x000D_ 点评：_x000D_ _x000D_ “院内+院外”双轮驱动，三七全产业链优势布局。公司充分利用集采中标及医保解限两大窗口期，稳步推进和开拓市场渠道，不断提升产品市场占有率，努力夯实稳定针剂市场格局。玻璃酸钠注射液、草乌甲素软胶囊等骨风关类产品在院内诊疗需求…	https://stock.finance.sina.com.cn/stock/go.php/vReport_Show/kind/company/rptid/749031041908/index.phtml
749060252732	华润三九(000999)：CHC业务持续增长 昆药整合稳步推进	23 年单Q2 实现营业收入67.94 亿元（+63.68%），归母净利润7.26 亿元（+22.59%），扣非归母净利润6.96 亿元（+30.29%）。上半年公司收入大幅增长主要由于CHC 业务快速增长以及并表昆药集团，剔除昆药并表影响，上半年营收同比增长18.50%。 点评： CHC 业务线：23 年上半年CHC 健康消费品业务实现营收 68.19 亿元（+23.19%），毛利率为56.97%（+1.10pct）。公司感冒品类实现较快增长，消费者品牌认可度和产品市场地位进一步加强。大健康业务2023 年上半年实现快速增长。在康复慢病业务方面，聚焦三七全产业链，与昆药集团协同打造三七发展平台，业务保持稳定。我们认为公司CHC 业务持续提升，“999”品牌系列产品快速增长，品牌优势继续稳固。 处方线：23 年上半年处方药业务实现营业收入 27.80 亿元（+11.31%），毛利率为51…	http://stock.hexun.com/2023-09-26/210380967.html
749152183859	隆基绿能(601012)2023年半年度业绩点评：公司盈利能力改善 押注BC电池技术推新品	类别：公司_x000D_ 机构： 东莞证券股份有限公司 研究员：刘兴文/苏治彬 日期：2023-09-27 事件：公司近期发布2023年半年度报告。2023年上半年公司实现营业总收入646.5亿元，同比增加28.4%；实现归母净利润91.8亿元，同比增加41.6%；实现扣非后归母净利润90.6亿元，同比增加41.5%。_x000D_ _x000D_ 点评：_x000D_ _x000D_ 公司业绩保持增长，盈利能力同比改善。2023Q2 公司实现营收363.34亿元，同比增长14.3%，环比增长28.3%；归母净利润55.4 亿元，同比增长45.2%，环比增长52.3%。上半年，公司的毛利率19.08%，同比增长1.47 个百分点，净利率14.15%，同比增长1.34 个百分点；加权平均净资产收益率13.69%，同比增长1.05 个百分点，公司盈利能力改善。_x000D_ _x000D_ …	https://stock.finance.sina.com.cn/stock/go.php/vReport_Show/kind/company/rptid/749152183859/index.phtml
748976347058	计算机行业周报：金融大模型积极进展 关注金融IT板块	类别：行业_x000D_ 机构： 中信建投证券股份有限公司 研究员：阎贵成/金戈/甘洋科/应瑛 日期：2023-09-25 核心观点：_x000D_ _x000D_ 国内首个金融行业大模型标准发布，华为发布金融大模型解决方案，度小满宣布“轩辕70B”金融大模型开源，恒生LightGPT大模型以及四款基于光子打造的数智产品将面向金融机构客户开启内测，国内金融大模型创新与实践积极推进，生态逐步成熟。_x000D_ _x000D_ 看好金融行业数智化进程加速，推荐关注恒生电子、宇信科技、金证股份、长亮科技等金融大模型落地受益厂商，同时建议关注受益资本市场情绪逐步回暖的指南针、同花顺等。_x000D_ _x000D_ 行情回顾：_x000D_ _x000D_ 上期，计算机（申万）指数上涨1.22%，跑赢沪深300 指数0.41pp。_x000D_ _x000D_ 投资组合：_x000D_ _x0…	https://stock.finance.sina.com.cn/stock/go.php/vReport_Show/kind/lastest/rptid/748976347058/index.phtml
749073149239	8月钻石行业跟踪报告：8月印度钻石进出口情况较7月回暖 培育钻石毛坯进口同比由负转正	类别：行业_x000D_ 机构： 万联证券股份有限公司 研究员：李滢 日期：2023-09-26 8 月培育钻石数据：_x000D_ _x000D_ 印度培育钻石进出口情况相较7 月有所回暖。据GJEPC 数据显示，2023 年8 月印度培育钻石毛坯进口额为1.35 亿美元，同比+19.84%，同比由负转正（2022 年10 月-2023 年7 月的月度同比均为负）；培育钻石裸钻出口额为1.18 亿美元，同比-17.82%，较7 月跌幅缩小。_x000D_ _x000D_ 印度培育钻石出口和进口渗透率均同比提升。2023 年8 月，印度培育钻石出口端渗透率为7.96%，同比+0.88pct；培育钻石进口渗透率为9.31%，同比+1.66pct。_x000D_ _x000D_ 8 月天然钻石数据：_x000D_ _x000D_ 印度天然钻石毛坯进口额同比跌幅大幅缩窄。据GJEPC 数据显示…	https://stock.finance.sina.com.cn/stock/go.php/vReport_Show/kind/lastest/rptid/749073149239/index.phtml
748592256681	嘉实沪深300红利低波动ETF投资价值分析：红利+低波 震荡市中的防御组合	类别：基金_x000D_ 机构： 国信证券股份有限公司 研究员：张欣慰/刘璐 日期：2023-09-21 红利+低波，震荡市中的防御组合_x000D_ _x000D_ Smart Beta 产品在过去十几年间获得了极大的发展，备受全球市场关注。全球Smart Beta ETF 中，红利产品的规模最大，参考海外，低利率时代，红利是竞争力比较强的一种收益形式。当前我国10 年期国债收益率基本处于2.5%附近，近两年整体呈现下行的趋势，沪深300 红利低波动指数股息率常年位于4%以上，从股息率的角度看，红利产品相较债权类产品具有一定的优势。_x000D_ _x000D_ 2021 年之后A 股市场风格切换，成长风格大幅回调，价值风格抗跌性明显，大幅跑赢成长风格。今年以来，截至2023 年8 月31 日沪深300 红利低波动指数仍有正收益，且优于上证红利指数和沪深300 红利指数。长期来看，股息…	https://stock.finance.sina.com.cn/stock/go.php/vReport_Show/kind/lastest/rptid/748592256681/index.phtml
748714074976	能源行业：俄罗斯临时禁止汽柴油出口 油价高位运行支撑增强	类别：行业_x000D_ 机构： 信达证券股份有限公司 研究员：左前明/胡晓艺 日期：2023-09-22 事件：俄罗斯政府周四表示，为了稳定国内市场，俄罗斯已暂时禁止向四个前苏联加盟共和国以外的所有国家出口汽油和柴油，并立即生效。_x000D_ _x000D_ 俄罗斯表示，这项禁令不适用于根据政府间协议向莫斯科领导的欧亚经济联盟成员国供应的燃料。欧亚经济联盟包括白俄罗斯、哈萨克斯坦、亚美尼亚和吉尔吉斯斯坦。声明显示，政府还将每日监测燃料采购情况，以满足农业生产者的需求，并及时调整数量。汽油、柴油出口禁令于9 月21 日开始实施。_x000D_ _x000D_ 点评：_x000D_ _x000D_ 缓解国内燃料短缺导致的成品油价格快速上涨势头，是俄罗斯政府决定临时限制成品油出口的主要原因。据中国化工报报道中提及的贸易商的表态，俄罗斯国内燃料市场受到多种因素的冲击，包括炼油厂的停工检修、铁…	https://stock.finance.sina.com.cn/stock/go.php/vReport_Show/kind/lastest/rptid/748714074976/index.phtml
749030805318	有色金属行业周报：美联储维持利率不变 黄金有望迎来反弹	类别：行业_x000D_ 机构： 海通证券股份有限公司 研究员：陈先龙/陈晓航/甘嘉尧 日期：2023-09-26 贵金属：美联储最新点阵图显示年内或仍有加息。9 月22 日伦敦现货黄金价、银价分别为1927.35 美元/盎司和23.65 美元/盎司，周涨跌幅分别为0.0%和+2.6%。COMEX 黄金价、银价分别为1944.9 美元/盎司和23.82 美元/盎司，周涨跌幅分别为0.0%和+2.2%。上海金交所金价、银价涨跌幅分别为+0.45%和+0.76%。据美联储，9 月议息会议中美联储宣布将联邦基金利率目标区间维持在525-550 BP 之间不变。此外，根据美联储公布的9 月点阵图，19 位官员中有12 位官员认为在23 年内仍需加息25BP，24-25 年利率中枢较6 月点阵图预期有明显上移。由于美联储加息或已近尾声，我们认为，短期来看美联储货币政策对黄金的压制效果或已见顶，黄金…	https://stock.finance.sina.com.cn/stock/go.php/vReport_Show/kind/lastest/rptid/749030805318/index.phtml
749078708258	京沪高铁(601816)：黄金区位核心资产 价值与成长兼备	本线和跨线量、价、周转有望齐升，京福安徽产能爬坡加速公司网、运业务分别对应跨线和本线，受益于疫情修复、需求自然增长，跨线、本线均有望量、价、周转齐升，但跨线、本线增长节奏、看点有所不同。跨线在网络连通、交叉引流的背景下，量方面的弹性大于本线，是短期增长的主要支撑；本线价的弹性大于跨线，且定价市场化程度有望逐步深化，是中长期增长的主要看点。此外，全线受需求时空分布不均对周转形成制约，未来有望随长编组列车增加、缩短列车间隔、平行线路疏解区间瓶颈逐步改善。最后，京福安徽区位、时速均有较强优势，叠加未来干线网络持续连通，产能爬坡加速、有望在中期视角下为母公司增厚业绩。 投资建议：价值与成长兼备，对应约40%上涨空间疫情后需求强势修复，叠加财务费用下行、京福安徽产能爬坡，成长属性将逐渐兑现。我们测算2023 至2025 年，收入为428.3 亿元、473.6 亿元、514.6 亿元，同比增长121…	http://stock.hexun.com/2023-09-26/210382724.html
749231210489	智翔金泰(688443)：自免广阔天地 新星展智飞翔	类别：公司_x000D_ 机构： 西南证券股份有限公司 研究员：杜向阳 日期：2023-09-28 推荐逻辑：1） GR1501为首个提交NDA国产IL-17A单抗，中重度斑块状银屑病患者超110 万，中轴型脊柱关节炎等适应症也处于后期临床，国内潜在销售峰值达30亿元；2）IL-4A 单抗研发进度位于国内第一梯队，2023 年内有望开展Ⅲ期临床，中重度特应性皮炎超1800 万患者，国内潜在销售峰值达36 亿元；3）抗狂犬病毒双抗处于Ⅲ期临床，有望免疫球蛋白用于暴露后预防，国内潜在销售峰值达11 亿元。_x000D_ _x000D_ GR1501 为首个提交NDA的国产IL-17A单抗。公司III 期临床试验随访显示，试验达到主要临床终点。200mg Q4W维持治疗，第24 周达到PASI75 受试者比例为98.6%、达到PGA（0~1）受试者比例为84.4%。达到PASI75 受试者比例…	https://stock.finance.sina.com.cn/stock/go.php/vReport_Show/kind/company/rptid/749231210489/index.phtml
749067893376	中国旅游业运行现状与发展分析：疫情影响减弱叠加出游限制“松绑” 旅游市场显著升温	类别：行业_x000D_ 机构： 远东资信评估有限公司 研究员：简尚波 日期：2023-09-26 旅游业是国民经济的战略性支柱产业，《“十四五”旅游业发展规划》发出建设“旅游强国”的号召。2020 年以来，统筹疫情防控和经济发展，旅游消费政策总体呈现从限制到放开的变化。从产业建设角度，近年文旅部陆续制定政策促进旅游业高质量发展。_x000D_ _x000D_ 行业总体运行方面，疫情前，旅游业受惠于经济增长、政策支持、基建改善等多因素呈现持续较快增长；疫情三年（2020-2022）旅游业受损，国内游缩水严重，国际游基本停滞；2023 年以来受疫情减弱下的消费政策松绑刺激，上半年国内游人次、收入同比分别增长63.9%、95.9%，出境游人次恢复至2019 年同期的49.7%。_x000D_ _x000D_ 行业内部运行方面：（1）旅行社：疫情三年组织国内游人次年均降39.45%，旅行社数量…	https://stock.finance.sina.com.cn/stock/go.php/vReport_Show/kind/lastest/rptid/749067893376/index.phtml
749130966213	今世缘(603369)：特A类高增引领结构提升 全年锚定百亿目标	类别：公司_x000D_ 机构： 浙商证券股份有限公司 研究员：杨骥/张家祯 日期：2023-09-27 投资要点_x000D_ _x000D_ 事件：23H1 公司实现营业总收入59.70 亿元，同比+28.46%；实现归母净利润20.50 亿元，同比+26.70%。23Q2 公司实现营业总收入21.67 亿元，同比+30.61%；实现归母净利润7.95 亿元，同比+29.13%，符合此前业绩预告。公司全年目标营收百亿，业绩确定性强。_x000D_ _x000D_ 受益于100-300 元价格带扩容，特A 类占比显著提升2023Q2 公司特A+类/特A 类/A 类/B 类/C、D 类/其他营业收入13.89/6.47/0.73/0.24/0.15/0.02 亿元（同比+26.53%/+41.79%/+20.62%/+11.61%/+20.11%/-25.03%），其中特A+类收入占比变…	https://stock.finance.sina.com.cn/stock/go.php/vReport_Show/kind/company/rptid/749130966213/index.phtml
748907541634	银行间流动性周报：10月阶段性宽松窗口开启	类别：债券_x000D_ 机构： 国泰君安证券股份有限公司 研究员：王佳雯/胡建文 日期：2023-09-24 本报告导读：随着月末财政支出和央行跨季逆回购投放力度加大，9月末流动性有望保持平稳，10 月阶段性宽松窗口大概率开启。_x000D_ _x000D_ 摘要：_x000D_ _x000D_ 过去一周（9 月18 日—9 月22 日）跨季回购价格依然维持高位，但央行加大跨季逆回购投放力度，跨季融资难度下降，同时月内到期的回购利率开始下行，银行体系净融出开始回升。中秋国庆假日连续，而且10 月7日和8 日为非银机构调休日，过去一周非银跨季的实际融资期限在14 天以上，R021 中位数3.09%处于较高水平，未见明显回落。但隔夜利率在9月20 日后逐步回落，9 月22 日DR001、R001 分别较9 月20 日回落33bp、33bp 到1.69%、1.79%，大行和股份制银行净融出开…	https://stock.finance.sina.com.cn/stock/go.php/vReport_Show/kind/lastest/rptid/748907541634/index.phtml
748941970530	计算机行业：WINDOWSCOPILOT激活海量AI应用市场	类别：行业_x000D_ 机构： 国泰君安证券股份有限公司 研究员：李沐华/伍巍 日期：2023-09-25 本报告导读：_x000D_ _x000D_ 微软作为AI 应用侧的标杆，其推出的基于Windows 11 的Copilot 将成为一个超级庞大的生态入口，整个AI 应用侧市场迎来重要突破，AI 算力需求也将进一步提升。_x000D_ _x000D_ 摘要：_x000D_ _x000D_ 核心观点：随着Windows Copilot 正式推出，Windows Copilot 让用户可以用人类语言与操作系统进行交互，并且Windows Copilot 将会成为一个超级庞大的生态入口，通过插件连接万物，整个AI 应用侧市场迎来重要突破，AI 算力需求也将进一步提升。鉴于微软优先享有商用OpenAI 大模型的权利，从而也能够迅速将大模型能力创新嵌入核心产品与服务中，在全球AI 应用领域具…	https://stock.finance.sina.com.cn/stock/go.php/vReport_Show/kind/lastest/rptid/748941970530/index.phtml
749153645508	电气设备行业动态点评：IEA发布《全球氢能评论2023》 行业加速发展	类别：行业_x000D_ 机构： 东方财富证券股份有限公司 研究员：朱晋潇/周旭辉 日期：2023-09-27 【事项】_x000D_ _x000D_ IEA 发布《全球氢能评论2023》，行业加速发展。近日，IEA 国际能源署发布2023 年版《全球氢能评论2023》（Global Hydrogen Review2023）。_x000D_ _x000D_ 【评论】_x000D_ _x000D_ 本次IEA 发布《全球氢能评论2023》有以下几点值得梳理关注：_x000D_ _x000D_ 1、低碳氢产量：2022 年约67 万吨，占全球氢产量的0.7%，其中绿氢0.1%，灰氢+CCUS 0.6%。2030 年预计达3800 万吨/年，相较于2022年版上调50%，其中绿氢2700 万吨/年，灰氢+CCUS 1000 万吨/年。_x000D_ _x000D_ 2、电解槽装机项目：从小型示…	https://stock.finance.sina.com.cn/stock/go.php/vReport_Show/kind/lastest/rptid/749153645508/index.phtml
748611420778	快递行业8月数据点评：8月单量增速超18% 单价环比有所提升	类别：行业_x000D_ 机构： 招商证券股份有限公司 研究员：苏宝亮/肖欣晨/魏芸 日期：2023-09-21 本篇报告详细分析了快递行业8 月数据，8 月快递业单量增速达18.3%,增速环比提升明显，申通单量增速持续领跑行业，我们看好行业头部企业竞争优势持续扩大，维持对行业的投资评级“推荐”。_x000D_ _x000D_ 业务量：8 月业务量增速超18%，预计9 月份业务量增速达22%。消费复苏下业务量持续修复。伴随电商平台促销，行业日均单量达到小高峰，6/7 月份行业增速分别为11.4%、11.7%。据国家邮政局数据，8 月份快递业务量达到111.6 亿件，行业增速为18.3%。根据交通运输部，近一周（9.11-9.17）快递揽收量为27.5 亿件，环比下降0.2%。据我们测算，9 月1 日-9 月17 日预计行业业务量为66.8 亿件，同比增速约为21.6%。_x000D_ _…	https://stock.finance.sina.com.cn/stock/go.php/vReport_Show/kind/lastest/rptid/748611420778/index.phtml
748714017250	汽车行业月报：政策密集催化 智能网联汽车快速发展	类别：行业_x000D_ 机构： 中原证券股份有限公司 研究员：刘智/余典 日期：2023-09-22 行情概述：截止到9 月20 日收盘，9 月汽车（中信）板块上涨0.66%，同期沪深300 指数下降1.58%，跑赢大盘2.24 个百分点。_x000D_ _x000D_ 从板块排名来看，9 月汽车行业涨跌幅在中信30 个一级行业中位列第9 位。汽车（中信）板块PE（TTM）为23.87 倍，处于近5 年以来66.41%分位，汽车（中信）行业PE（TTM）在30 个中信一级行业中排名第11 位。_x000D_ _x000D_ 市场表现：8 月购车需求“淡季不淡”。8 月，汽车产销分别完成257.5 万辆和258.2 万辆，同比分别增长7.5%和8.4%，环比分别增长7.2%和8.2%。乘用车、商用车产销同环比均双增长。8 月汽车经销商库存系数为1.54，同比上升5.5%，环比下降9.4%…	https://stock.finance.sina.com.cn/stock/go.php/vReport_Show/kind/lastest/rptid/748714017250/index.phtml
748897919388	煤炭行业周报：煤炭开启补库存周期 煤价持续上涨	类别：行业_x000D_ 机构： 上海申银万国证券研究所有限公司 研究员：施佳瑜 日期：2023-09-24 本期投资提示：_x000D_ _x000D_ 截至9 月22 日，动力煤方面，根据中国煤炭市场网，秦皇岛港口动力煤现货价环比上周五上涨80 元/吨，收报995 元/吨。供给端，主产地安监强化，煤炭生产受限，虽然本周日均调入量环比上涨，根据中国煤炭市场网统计的环渤海四港区数据，截至9 月22 日，当周环渤海四港区日均调入量189.89 万吨，环比上周增加12.47 万吨，涨幅7.03%，但同比去年低3.39%，较5 月底最高峰低9.00%；需求端，由于终端库存不高，补库需求增加，本周日均调出量179.21 万吨，环比上周增加8.03 万吨，涨幅4.69%，高于去年同期；港口库存方面，截至本周五，环渤海四港口库存2132.16 万吨，环比上周增加47.74 万吨，涨幅2.29%，但比…	https://stock.finance.sina.com.cn/stock/go.php/vReport_Show/kind/lastest/rptid/748897919388/index.phtml
748901963796	固定收益定期：基本面高频数据跟踪：生产地产走弱 消费出行改善	类别：债券_x000D_ 机构： 国盛证券有限责任公司 研究员：杨业伟/朱帅 日期：2023-09-24 根据我们在2023 年9 月5 日发布的报告《基本面高频数据——债市投资占先手的有效工具》，我们基于统计体系构建了覆盖总体、生产、需求、物价、融资等全方位的高频数据体系，分析了高频和对应统计指标的相关性，并在此基础上构建了国盛固收基本面高频指数及分项。_x000D_ _x000D_ 本期国盛基本面高频指数小幅回升，由119.2 点回升至119.3 点，本周同比增长4.7%（前值为增长4.5%），利率债多空信号仍偏多，信号因子同上周持平于5.6%。_x000D_ _x000D_ 生产高频指数小幅回落至119.8 点。电炉开工率（以下均为周内均值）小幅下降至66.7%，聚酯开工率回落至88.1%，半胎开工率回落至72.1%。_x000D_ _x000D_ 地产销售高频指数回落至54.1 …	https://stock.finance.sina.com.cn/stock/go.php/vReport_Show/kind/lastest/rptid/748901963796/index.phtml
748966917649	大类资产风险定价周度观察：23年9月第4周	9 月第3 周各类资产表现：_x000D_ _x000D_ 9 月第3 周，美股三大指数普遍下跌。Wind 全A 上涨0.31%，日均成交额下降至6510.29 亿元。30 个一级行业中有15 个实现上涨，通信、非银行金融和银行表现相对靠前；电力及公用事业、有色金属和国防军工表现靠后。信用债指数上涨0.03%，国债指数下降0.15%。_x000D_ _x000D_ 风险提示：地缘冲突进一步升级；经济复苏斜率不及预期；货币政策超预期收紧	https://stock.finance.sina.com.cn/stock/go.php/vReport_Show/kind/lastest/rptid/748966917649/index.phtml
748867316299	美容护理行业研究：贝泰妮高端线新品上市 国际巨头加码胶原蛋白	化妆品板块： 贝泰妮：AOXMED 高端线新品上市，主打修红嫩肤。2023 年9 月22日，贝泰妮集团旗下的高端专业护肤品牌AOXMED 瑷科缦推出绿金刚速修次抛，该产品使用多为年轻化科技美雅安缇MLYAAT-1002，达到三层组织层面赋活：表层细胞裂解液促进表皮蛋白合成，信号肽+促进中层胶原合成，类肉毒抑制底层表情纹收缩；同时具备抗氧化、抗糖、抗损伤因子三抗的功效。该产品于AOXMED 天猫官旗上线，预售价格为528 元/12 支。我们认为随着AOXMED 新品的上市，贝泰妮高端护肤线产品矩阵不断丰富，弥补了公司高端产品布局的空缺，丰富并完善贝泰妮产品矩阵，打造第二增长曲线，提升公司整体的品牌附加值。 宜春大海龟：角鲨烯原料市场快速增长，角鲨烯原料第一股拟上市角鲨烯广泛应用于化妆品和食品等领域。角鲨烯又称三十碳六烯，是一种多不饱和烃类，在人体胆固醇合成等代谢过程中产生。它广泛分布于动植…	http://stock.hexun.com/2023-09-24/210340404.html
749037133606	计算机行业快报：365 COPILOT的商业化历程与未来展望	Microsoft Copilot 将于9 月26 日正式上线，通过Windows 11 更新进行免费提供，同时Windows 11 还将新增150 项由生成式AI 驱动的新功能。此次Windows 11 的更新包括Copilot，以及如绘画、照片、截图工具、Clipchamp、记事本等150 项AI 新功能。其中，绘画、照片等编辑、创作的AI 能力将显著增强；截图工具、Clipchamp 等新增生成式AI 功能。此外，Bing 将添加最新的DALL-E3 支持，可提供根据用户的搜索历史记录生成更加个性化的答案、AI 驱动的购物体验等功能，并更新至Bing Chat 企业版。 Microsoft 365 Copilot 将升级Microsoft 365 Chat 功能，可应用于用户所有的程序中，并于11 月1 日面向企业客户进行开放。Microsoft 365 Chat 包含汇总数据和信…	http://stock.hexun.com/2023-09-26/210368055.html
699983478586	化学制品行业：煤化工：油价高企背景下关注优质煤头企业的业绩稳健性	1、油价高企： 受全球供需紧张及地缘政治催化，国际油价持续大涨，截至周末，布伦特原油期货结算价达约118 美元/桶，已进入历史上的超高油价区间。 2、煤炭原料采购成本上限受到限制： 12 月，发改委公布煤炭长协签订履约方案征求意见稿。5500K 动力煤调整区间在550—850 元之间,其中下水煤长协基准价为700元/吨。此后多次发布维持煤炭价格稳定运行等相关表述。目前煤炭尽管供需趋紧，但煤炭原料采购价上限仍然面临一定刚性限制。 简评 煤化工企业主营产品价差扩大，主营业绩稳健性强煤化工（或称煤头化工）为石油化工（或称油头化工）的替代路线，可以生产油头路线能够生产的大部分产品，当油价上涨时通常油头路线成本上升，并且经由产业链向下传导至化工产品。油价高企时，上述传导不一定顺利，油头企业除去库存升值收益，主营业务利润率是因此受损的；但煤头路线情况则有区别，一方面产品端在涨价或至少持稳，一方面原料…	http://stock.hexun.com/2022-03-07/210384596.html
747416918449	全球生成式AI应用全景图：AI应用进入大爆发时代	（报告出品方/作者：华金证券，方闻千）_x000D_ 一、生成式 AI 应用进入大爆发时代_x000D_ 1）驱动因素：大模型、算力与生态的共振_x000D_ 生成式人工智能是自个人 PC 出现和互联网诞生以来最具颠覆性的技术创新，随着大模型以及 ChatGPT 等一系列“杀手级”应用的诞生，生成式 AI 在文本、图像、代码、音频、视频和3D模型等领域展现出了强大的能力。当前生成式 AI 的发展仍处于起步阶段，未来有望为全球经济创造数万亿美元的价值，并对各行各业的工作方式产生重大影响。在生成式AI 产业突变的背后是人工智能技术数十年的积累和酝酿，其演进历程具体可分为四个阶段：_x000D_ 1）专家系统：上世纪 50 年代前后，人工智能开始萌芽，基于规则的专家系统占据主导，这一时期，使用复杂的逻辑规则，能够处理包括字符匹配、词频统计等一些简单的任务，机器翻译以及语言对话的初级产品，196…	https://k.sina.com.cn/article_2166321755_811f725b02001b549.html
748993120867	微电生理(688351)：立足核心技术研发 成就电生理国产领袖	类别：公司_x000D_ 机构： 中信证券股份有限公司 研究员：宋硕/陈竹 日期：2023-09-25 从行业前景、商业模式、竞争格局、发展空间上看，微电生理均有良好前景：_x000D_ _x000D_ 1）行业前景：电生理手术尚待普及，我国百亿蓝海市场正在开启；2）商业模式：三维设备建立渠道，依靠耗材赚永续的钱；3）竞争格局：外资市占率90%，进口替代空间大，公司已进入技术+渠道正循环，先发优势明显；4）发展空间：_x000D_ _x000D_ 深挖行业价值链，内资龙头2030 年市值有望接近500 亿元。我们认为公司2023年合理估值为131 亿元，对应目标价28 元，首次覆盖，给予“买入”评级。_x000D_ _x000D_ 深耕行业十余载，成就国产电生理创新龙头。公司自2010 年成立起就专注于电生理介入诊疗与消融治疗，是首个能够提供三维心脏电生理设备与耗材完整解决方案的国产厂商…	https://stock.finance.sina.com.cn/stock/go.php/vReport_Show/kind/company/rptid/748993120867/index.phtml
748771313513	浪潮信息(000977)：聚焦“云+AI” 算力龙头迎来新发展	类别：公司_x000D_ 机构： 中泰证券股份有限公司 研究员：闻学臣/苏仪 日期：2023-09-23 浪潮信息是全球领先的云计算、大数据以及IT 基础架构产品、方案及服务提供商。_x000D_ _x000D_ 公司引领行业前沿应用，在云计算服务浪潮中与互联网厂商的密切合作，公司市占率不断提升。公司服务器、存储产品市场占有率持续保持全球前列。同时公司从计算到智算的行业发展趋势，各项业务保持快速增长势头。服务器是公司的主要收入来源，近两年IT 终端及散件增速显著。从整体收入来看，公司主营业务收入从2019 年516.53 亿元增长到2022 年695.25 亿元，2019-2022 年复合增速约为10.41%。公司毛利率、净利率稳步提升，净利润维持较高增速。2022 年，公司销售费用率、管理费用率、研发费用率分别为2.17%/1.02%/4.65%，相较于2021 年，销售费用率、管理费…	https://stock.finance.sina.com.cn/stock/go.php/vReport_Show/kind/company/rptid/748771313513/index.phtml
748950459935	电子行业周报：自主可控深水区 半导体零部件亟待突破	近年来，美国对华始终保持尖端技术封锁政策，且当前美日荷已形成联合掣肘国内半导体制造业之势，这使国内厂商关键技术自主可控的意愿愈发强烈，补短板意识显著增加。精密零部件是半导体产业中上承材料下启设备的关键一环，也是半导体设备制造环节中难度较大、技术含量较高的关键一环，零部件直接影响半导体设备的技术演进和交付生产，是半导体产业中当之无愧的“卡脖子”环节。因半导体零部件具有细分市场小且碎片化、原材料性能指标要求高、认证程序复杂且周期长等特征，故其国产化之路荆棘满途。寸辖制轮，在中美科技对抗愈演愈烈的大环境下，半导体产业链的自主可控进入设备零部件国产化深水区。 目前，半导体零部件被美日欧高度垄断。据VLSI数据，全球半导体零部件供应商CR10长期稳定于50%，且其主要产品已基本覆盖各半导体零部件类型，主导零部件整体市场的发展。从细分产品来看，据芯谋研究，中国晶圆厂采购的主要设备零部件中，仅石英件、…	http://stock.hexun.com/2023-09-25/210357884.html
749019866163	建材周专题2023W37：因城施策持续推进 各地限购逐步取消	二线城市逐步取消限购，一线城市非核心区亦有跟进。9 月19 日，武汉、无锡相继通过调整政策全域取消限购；西安市住建局也召开会议就下一步工作进行研究部署，提出将进一步优化调整限购范围，西安二环以外区域取消限购；9 月22 日，长沙全域取消限购，居民家庭（含非本市户籍家庭）在本市购买首套商品住房，不再需要提供购房证明。9 月以来已有12 个二线城市全面取消限购，除本周外，9 月已取消限购的二线城市还包括沈阳、南京、大连、兰州、青岛、济南、福州、郑州、合肥。一线城市非核心区亦有跟进，9 月20 日广州市住房限购政策调整为，“在越秀、海珠、荔湾、天河、白云（不含江高镇、太和镇、人和镇、钟落潭镇）、南沙等区购买住房的，本市户籍居民家庭限购2 套住房”，这意味着广州全面取消番禺、黄埔、花都三区的楼市限购政策。本次政策还下调了非广州户籍人口在限购区域购房缴纳社保及个税年限，即由此前的5 年调整为2 年…	http://stock.hexun.com/2023-09-26/210363814.html
749034715267	2023年保险资管业发展报告点评：资产荒下的腾挪	事项：_x000D_ 近日，中国保险资产管理业协会发布《中国保险资产管理业发展报告（2023）》（以下简称“报告”），报告共计汇总2022年度196家保险公司、32家保险资管公司的综合调研成果，并总结2022年我国保险资金运用和资产配置行为及数据趋势。_x000D_ 国信非银观点：我国保险资管机构资产管理能力稳步提升，险资规模逐年稳增。业内保险资金为险资资金的主要来源，因此作为绝对收益型机构，险资资产配置行为以安全性、稳健性、长期性为主。在利率中枢下行、权益市场波动、优质非标资产减少的背景下，预计未来各险企将进一步加强权益类资产配置，FOF、ETF、REITS等有望成为贡献超额投资收益的新动能。建议关注资产端权益类资产配置占比较高、弹性较大的新华保险和中国人寿等。_x000D_ 评论：_x000D_ 险资规模持续扩张，资金来源多元化_x000D_ 截至2022年年底，我国保险业总资产规模…	https://data.eastmoney.com/report/zw_industry.jshtml?encodeUrl=i01cinYAYKs+F2lGc0xq9vroEPtxOzPK2adHC5oKvCA=
749110990913	清洁电器9月报：整体表现平稳 品牌持续推新	类别：行业_x000D_ 机构： 国泰君安证券股份有限公司 研究员：蔡雯娟/李汉颖/田平川 日期：2023-09-27 本报告导读：_x000D_ _x000D_ 8 月清洁电器整体表现平稳，延续以价换量趋势。品牌持续推新，多价位段布局。_x000D_ _x000D_ 摘要：_x000D_ _x000D_ 清洁电器小幅 波动，洗地机结构占比继续提升。根据奥维云网数据，2023 年8 月清洁电器线上销量/销额/均价同比-8.49%/-6.43%/+2.25%，8 月整体景气度延续6、7 月趋势，量额较之2022 年同期小幅走弱，价格增幅收窄。扫地机、洗地机、除螨仪与擦窗机结构占比提高，吸尘器、拖把结构占比继续下降。_x000D_ _x000D_ 扫地机8 月小幅波动，趋势相对维持。扫地机整体8 月销量/销额/均价分别同比-2%/-4%/-2% 。追觅/ 美的表现亮眼， 销量同比+74%/+…	https://stock.finance.sina.com.cn/stock/go.php/vReport_Show/kind/lastest/rptid/749110990913/index.phtml
749130413675	汽车行业研究：2023-8海外重点市场新能源汽车跟踪月报	类别：行业_x000D_ 机构： 太平洋证券股份有限公司 研究员：文姬 日期：2023-09-27 报告摘要_x000D_ _x000D_ 1）主要新能源汽车市场变化：欧洲：2023 年欧洲各国新能源汽车渗透率复苏但相较于2022 年12 月处低位。美国：IRA 法案及特斯拉降价刺激，整体市场持续景气。中国：新能源汽车补贴退坡影响减弱，2023 年新能源汽车销量复苏。_x000D_ _x000D_ 2）2023 年8 月北美地区新能源汽车销售概况：美国：销量13.5 万辆，同比/ 环比变动+62.92%/+3.04%,渗透率9.73% ，同比/ 环比变动+2.80/+0.06pcts; 加拿大： 销量1.13 万辆， 同比/ 环比变动+52.80%/+3.31%,渗透率7.18%，同比/环比变动+1.71/-0.24pcts。_x000D_ _x000D_ 3）2023 年8 月欧洲地区…	https://stock.finance.sina.com.cn/stock/go.php/vReport_Show/kind/lastest/rptid/749130413675/index.phtml
749119578645	科博达(603786)：Q3业绩环比高增 预计规模效应体现	类别：公司_x000D_ 机构： 华泰证券股份有限公司 研究员：宋亭亭 日期：2023-09-27 公司预计23 年前三季度营收同比+25%~35%，归母净利润同比+22%~27%科博达发布前三季度主要经营数据公告，预计23 年前三季度实现营收同比+25%~35%，归母净利润同比+22%~27%。经测算，预计公司23Q3 实现营收10.64~13.06 亿元， 环比23Q2 +1.5%~24.6% ， 同比22Q3+42.2~74.5%；预计23Q3 实现归母净利润1.66~1.84 亿元，环比23Q2 +15.2%~27.7%，同比22Q3 +53.9~70.7%。我们维持前次预测，公司23-25年EPS 分别为1.87/2.57/3.46 元。可比公司23 年Wind 一致预期PE 均值为40.8 倍，考虑到可比公司中星宇股份和拓普集团近期股价表现持续较好，将科博达对于可比公司平均估…	https://stock.finance.sina.com.cn/stock/go.php/vReport_Show/kind/company/rptid/749119578645/index.phtml
749213294119	2023年建材行业中报总结：行业底部龙头彰显强阿尔法 静待总量需求回升	类别：行业_x000D_ 机构： 中泰证券股份有限公司 研究员：孙颖/聂磊/韩宇/刘毅男/刘铭政 日期：2023-09-28 品牌建材：渠道变革、格局优化与成本改善促龙头业绩复苏。23Q2 涂料龙头三棵树、瓷砖龙头东鹏控股收入同比增速分别为22.39%、14.67%，领跑行业，背后原因主要是：1）涂料与瓷砖皆属竣工端品种，23H1 保交房推动竣工增速较高，需求端环境并不差；2）经历21 年下半年以来的地产下行，行业格局优化明显，龙头企业市占率提升；3）行业底部彰显企业战略和执行力的强α，三棵树小B 端发力推动收入高增，东鹏控股共享仓模式在当前市场环境下彰显竞争力，高值大尺寸产品占比亦有明显提升。23H1 板块企业利润弹性明显大于收入弹性，背后是压制利润端的原材料成本压力、信用减值压力及行业需求下滑压力皆得到一定程度缓解，其中原材料降价带给企业的利润增厚更大，行业需求23H1 虽仍较为低迷…	https://stock.finance.sina.com.cn/stock/go.php/vReport_Show/kind/lastest/rptid/749213294119/index.phtml
749226347741	东鹏饮料(605499)2023年前三季度主要经营情况点评：Q3收入增长强劲 全国化&第二曲线发展顺利	类别：公司_x000D_ 机构： 光大证券股份有限公司 研究员：陈彦彤/汪航宇 日期：2023-09-28 事件：东鹏饮料发布2023 年前三季度主要经营情况。公司预计2023 年前三季度实现营收约84.38 -87.71 亿元，同比增长约27%-32%，其中，2023 年第三季度预计实现营收约30.12-32.47 亿元，同比增长约28%-38%。此外，考虑到公司营收稳步增长以及规模化效应不断提高，公司预计2023 年第三季度及前三季度的归母净利润均将保持增长。_x000D_ _x000D_ Q3 收入增速强劲，全国化开拓&第二曲线产品发展顺利：_x000D_ _x000D_ 单Q3 公司预计实现营业收入约30.12 -32.47 亿元，同比增长约28%-38%。单Q3 公司收入增速中枢为33%，环比Q2 略有提速，预计主要系公司全国化开拓提速、第二曲线产品发展顺利所致：1）渠道方面，…	https://stock.finance.sina.com.cn/stock/go.php/vReport_Show/kind/company/rptid/749226347741/index.phtml
748592206257	机械设备：摩托车行业2023年8月销售数据更新	【全行业】_x000D_ 全行业来：1-8月，150＜排量≤250cc累计销售90.34万辆，yoy+1%；排量＞250cc累计销售35.68万辆，yoy+2%。_x000D_ 8月单月，150＜排量≤250cc销售13.21万辆，yoy+23%；排量＞250cc销售4.76万辆，yoy-32%。_x000D_ 【春风动力】_x000D_ 1-8月，公司110cc+两轮车累计销售10.3万辆，yoy+22%，其中150＜排量≤250cc销售3.3万辆，yoy-4%；排量＞250cc销售5.1万辆，yoy+53%。_x000D_ 8月单月，公司110cc+两轮车销售1.3万辆，yoy-7%，其中150＜排量≤250cc销售4383辆，yoy-17%；排量＞250cc销售5853辆，yoy+8%。_x000D_ 公司四轮车销量持续整体维稳：1-8月，公司累计销售9.6万辆，yoy-11%；8…	http://stockfinance.sina.cn/stock/go.php/paper/reportid/748592206257/index.phtml?vt=4&cid=76524&node_id=76524
748606016734	国博电子(688375)：射频集成电路产能增长 终端领域产品量产交付	类别：公司_x000D_ 机构： 兴业证券股份有限公司 研究员：石康/李博彦 日期：2023-09-21 2023年 上半年，公司实现营收19.21 亿元，同比增长10.67%；归母净利润3.09 亿元，同比增长17.75%；扣非归母净利润2.82 亿元，同比增长10.79%。_x000D_ _x000D_ 公司公告2023 年半年度利润分配方案：公司拟以总股本4.00 亿股为基数，向全体股东每10 股派发现金红利6.25 元（含税），合计拟派发现金红利2.50 亿元，占公司2023年半年度归母净利润的比例为81.00%。_x000D_ _x000D_ 射频集成电路产业化项目部分转固。公司射频集成电路产业化项目（一期）预算9.03亿元，截至上半年末，累计投入占预算比例100.54%，上半年转固金额5.94 亿元。首发募投项目射频芯片及组件产业化项目承诺投资总额14.75 亿元，截至上半年…	https://stock.finance.sina.com.cn/stock/go.php/vReport_Show/kind/company/rptid/748606016734/index.phtml
748968469482	策略观点：已积累足够积极因素 节前有望延续上涨趋势	类别：策略_x000D_ 机构： 中邮证券有限责任公司 研究员：杨柳/曲虹宇/黄子崟/段利强 日期：2023-09-25 投资要点_x000D_ _x000D_ 本周A 股周一至周四加速下跌，周五一阳包三阴，大部分主要股指都实现了周度正收益率。除未回补8 月28 日向上跳空缺口的上证指数外，至周五A 股整体已经做出双底形态。对于本周五的强势反弹，我们认为反弹所需要的基本面积极因素早已具备，更多在反应市场情绪的转好：①中美双方商定，成立经济领域工作组，包括“经济工作组”和“金融工作组”，中美之间竞争短期内出现缓和迹象，有助市场情绪的恢复；②AI 龙头昆仑万维公告称，公司控股股东、实际控制人周亚辉、及一致行动人盈瑞世纪承诺未来三年不以任何形式减持所持有的公司股票，相当程度上打消了投资者对科技类公司后续股东减持的担忧。_x000D_ _x000D_ 目前已积累足够积极因素，节前有望延续上涨趋势…	https://stock.finance.sina.com.cn/stock/go.php/vReport_Show/kind/lastest/rptid/748968469482/index.phtml
749213994274	网宿科技(300017)：AI浪潮迭起 CDN龙头再扬帆	类别：创业板_x000D_ 机构： 民生证券股份有限公司 研究员：马天诣/谢致远 日期：2023-09-28 网宿科技：全球领先的ICT 基础平台服务提供商。公司主营业务为：1）CDN及边缘计算，2）IDC 及液冷。近几年，公司围绕CDN 及边缘计算、云安全两大核心主业，以及私有云/混合云、MSP、液冷等新业务方向，不断完善产品矩阵，形成“2+3”的业务布局。目前公司已进入业绩释放期，1H23 实现营业收入23.26亿元，同比下降8.18%；归母净利润2.58 亿元，同比增长196.88%。公司有超过2800 个全球部署节点，超过20 万台全球部署服务器，业务覆盖全球70 多个国家及地区，服务超过3,000 家中大型客户。公司股权结构稳定，管理团队经验丰富，公司董事长刘成彦毕业于东南大学，曾任中国万网首席运营官，广泛的行业知识和管理经验使他成为了公司管理层的有力领导者。_x000D_ _…	https://stock.finance.sina.com.cn/stock/go.php/vReport_Show/kind/lastest/rptid/749213994274/index.phtml
748933643149	银行业周报：如何看待2023年国内系统重要性银行名单变化？	1、人民银行连续第三年发布D-SIBs 名单，2023 年入围机构首次增至20 家 2021 年以来，人民银行已连续三年发布D-SIBs 名单。2021 年10 月15 日，人民银行网站发布《系统重要性银行附加监管规定（试行）》（简称《附加监管规定》），《附加监管规定》从附加监管要求、恢复与处置计划、审慎监管等维度对国内系统重要性银行（D-SIBs）提出监管要求。同日，人民银行、原银保监会发布了基于2020 年数据评估的首批19 家D-SIBs 名单。 根据《系统重要性银行评估办法》，D-SIBs 的评估每年开展一次。若某银行满足下列任一条件，则应纳入D-SIBs 的评估范围：（1）以杠杆率分母衡量的调整后表内外资产余额在所有银行中排名前30；（2）曾于上一年度被评为系统重要性银行。自2021 年以来，人民银行网站已连续三年发布D-SIBs 名单。 2023 年入围银行较上年增加1 家，…	http://stock.hexun.com/2023-09-25/210357978.html
748976692017	盛天网络(300494)公司简评报告：社交业务驱动增长 关注新游上线节奏	游戏运营及IP 运营业务受产品周期拖累，社交业务驱动增长。2023 年H1，公司无重磅新游上线，同时早年上线的《三国志2017》《三国志·战略版》等核心产品流水有所下滑，导致游戏运营业务收入同比下滑13.09%至0.87 亿元，IP 运营业务收入同比下滑32.74%至1.59 亿元。受到游戏社交产品“带带电竞”在相关垂类应用中表现良好，公司以游戏社交为主的增值业务2023 年H1 创收4.64 亿元，驱动公司网络广告与增值业务收入同比增长43.42%至亿5.61 元。 新游上线贡献增量，社交与广告业务收入弹性较强。当前，公司储备项目有望于2023 年上线的包括：《潮灵王国：起源》（已获版号）、《大航海时代：海上霸主》（已获版号）、《星之翼》《零域幻想》《炁术行者》等。其中，重磅储备《大航海时代：海上霸主》基于光荣特库摩《大航海时代4》IP 改编，腾讯游戏负责国内区域的发行，2023 年4…	http://stock.hexun.com/2023-09-25/210361311.html
749066809585	快可电子(301278)2023年半年度业绩点评：公司产能持续提升 研发创新打造新增长点	类别：创业板_x000D_ 机构： 东莞证券股份有限公司 研究员：刘兴文/苏治彬 日期：2023-09-26 事件：公司近期发布2023年半年度报告。2023年上半年公司实现营业总收入6.49亿元，同比增加20.02%；实现归母净利润0.88亿元，同比增加86.16%；实现扣非后归母净利润0.82亿元，同比增加81.32%。_x000D_ _x000D_ 点评：_x000D_ _x000D_ 公司主营产品盈利能力提升，Q2 业绩保持高增。2023Q2 公司实现营收3.45 亿元，同比增长17.93%；归母净利润0.49 亿元，同比增长87.41%；扣非归母净利润0.46 亿元，同比增长89.08%。上半年，公司光伏接线盒营收达5.44 亿元，同比增长26.57%，毛利率为20.07%，同比提升4.09pct；光伏连接器、配件及其他收入分别为0.93 亿元、0.12 亿元，分别同比-8.9…	https://stock.finance.sina.com.cn/stock/go.php/vReport_Show/kind/lastest/rptid/749066809585/index.phtml
748867360040	医药生物行业研究：集采为创新药腾出支付空间 多项政策为创新药发展保驾护航	类别：行业_x000D_ 机构： 上海证券有限责任公司 研究员：邓周宇/张林晚 日期：2023-09-24 主要观点_x000D_ _x000D_ 行情回顾：过去一周（9.18-9.22 日，下同），A 股SW 医药生物行业指数上涨0.35%，板块整体跑输沪深300 指数0.46pct，跑输创业板综指0.18pct。在SW31 个子行业中，医药生物涨跌幅排名第12 位。港股恒生医疗保健指数过去一周下跌1.67%，跑输恒生指数0.98pct，在12个恒生综合行业指数中，涨跌幅排名第9 位。_x000D_ _x000D_ 本周观点：集采为创新药腾出支付空间，多项政策为创新药发展保驾护航_x000D_ _x000D_ 第八批集采落地，第九批集采已正式展开，进一步为创新药腾出支付空间。_x000D_ _x000D_ 2023年9月22日，国家医保局召开新闻发布会介绍：第八批国家组织药品集采已于7…	https://stock.finance.sina.com.cn/stock/go.php/vReport_Show/kind/lastest/rptid/748867360040/index.phtml
749080652367	债券分析：化债变局下的潍坊城投机会怎么看？	潍坊基本面基础较好，属于省内靠前梯队：潍坊产业、人口在山东省内均属靠前梯队，近三年人口净流入；产值构成以工业为主，规上工业产值、营业收入“双过1.1 万亿”；农业也较为发达，畜牧、蔬菜两大主导产业全产业链产值均过千亿元，系山东“粮食安全”重要阵地。财政数据后续或有改善空间，短期债务风险缓释的核心则在于是否能采取实际有效的化债举措来缓释目前的偿债压力，形成政策面的强力支撑。_x000D_ 上下联动，潍坊化债措施频出：1）省级层面，山东省级政府显示出了较高程度的重视，各级领导多次到潍坊调研，做出表态和指示，切实协调省属国企、金融支持、新增专项债、加强反腐力度等方面助力潍坊化债。2）自身努力上，潍坊化债专班+平台整合，设立专项基金防范流动性风险，自身“节流”也在落实中，政府新增投资项目控制严格。3）金融助力：今年6 月份以来，潍坊市已先后与多家金融机构签署战略合作协议，据不完全统计，未来3 到…	http://stockfinance.sina.cn/stock/go.php/paper/reportid/749080652367/index.phtml?vt=4&cid=76524&node_id=76524
748645981850	华西政策：从历次中美APEC会议看两国关系变迁	类别：策略_x000D_ 机构： 华西证券股份有限公司 研究员：李立峰/顾洋恺 日期：2023-09-21 中美外交窗口期迎来关键节点_x000D_ _x000D_ 中美窗口期需珍惜。中国台湾地区领导人大选将在2024 年1月13 日开启,目前选情正在发酵当中,这对中美关系或形成扰动。当下来看,2023 年11 月12 日在美国旧金山举行的APEC 第三十次领导人非正式会议有望成为中美元首会晤最佳时机。_x000D_ _x000D_ APEC 的定位与发展_x000D_ _x000D_ 亚太经济合作组织,简称“APEC”,是亚太地区层级最高、领域最广、最具影响力的经济合作机制。其成立目的是作为区域经济合作论坛,主要讨论与全球和区域经济有关议题。_x000D_ _x000D_ 1993 年美国西雅图峰会_x000D_ _x000D_ 1993 年11 月20 日在美国西雅图举办领导人非正式…	https://stock.finance.sina.com.cn/stock/go.php/vReport_Show/kind/lastest/rptid/748645981850/index.phtml
748717860526	2023年石化板块中报综述：原油价格高位震荡 关注中下游复苏节奏-国泰君安国际	2023H1 油气价格中枢维持高位，上游板块景气持续，中下游盈利继续承压。预计未来油价仍将保持较高水平，投资首选低估值高分红上游标的，关注中下游需求改善。 摘要： 维持行业增持 评级。预计上游品种盈利确定性好于市场预期，投资首选低估值高分红上游标的，推荐中国海洋石油(600938.SH)、中国石油（601857.SH）、中海油服(601808.SH)；随着疫情的控制，中下游需求逐步改善，且稳增长背景下化工项目落地预期好转，推荐煤化工的宝丰能源（600989.SH）、轻烃板块的卫星化学（002648.SZ）；推荐民营炼化板块的恒力石化（600349.SH）、荣盛石化（002493.SH）、东方盛虹（000301.SZ）以及长丝板块的桐昆股份（601233.SH）、新凤鸣（603225.SH）；新材料方面继续看好芳纶以及POE 方向。 油气价格中枢维持高位，上游板块高景气度持续。俄乌局势紧张…	http://stock.hexun.com/2023-09-22/210334777.html
748942288700	食品饮料行业周报：双节将至 关注动销与需求复苏进程	类别：行业_x000D_ 机构： 东莞证券股份有限公司 研究员：魏红梅/黄冬祎 日期：2023-09-25 本周行情回顾：2023年9月18日-9月22日，SW食品饮料行业指数整体上涨1.19%，板块涨幅位居申万一级行业第七位，跑赢同期沪深300指数约0.38个百分点。细分板块中，多数细分板块跑输沪深300指数。_x000D_ _x000D_ 本周陆股通净流入情况：2023年9月18日-9月22日，陆股通共净流入0.29亿元。其中，传媒、银行与汽车板块净流入居前，电力设备、医药生物与食品饮料板块净流出居前。食品饮料板块净流出14.15亿元，净流出金额位居申万一级行业第三位。_x000D_ _x000D_ 行业周观点：双节将至，关注动销与需求复苏进程。白酒板块：双节即将到来，酒企陆续部署中秋国庆旺季销售。由于今年双节时间较长，预计婚宴等宴席需求或迎来小高峰，经销商备货积极性、白酒动销、白酒…	https://stock.finance.sina.com.cn/stock/go.php/vReport_Show/kind/lastest/rptid/748942288700/index.phtml
749034570344	机械行业周报：8月我国光伏装机继续高增 关注设备环节技术进步机遇	类别：行业_x000D_ 机构： 湘财证券股份有限公司 研究员：轩鹏程 日期：2023-09-26 核心要点：_x000D_ _x000D_ 上周机械设备行业上涨0.6%，跑输大盘0.2 个百分点上周，机械设备行业上涨0.6%，跑输沪深300 指数0.2 个百分点。机械行业中表现较好的板块包括其他自动化设备（4.3%）、机器人（3.2%）、纺织服装设备（2.4%），表现靠后的板块包括半导体设备（-4.5%）、光伏加工设备（-2.3%）、工控设备（-1.1%）。_x000D_ _x000D_ 光伏设备：8 月我国新增光伏装机容量同比增长137.4%8 月份，我国新增光伏装机容量为16.0GW，同比增长137.4%，1-8 月累计新增光伏装机容量113.2GW，同比增长154.5%。8 月份，我国光伏电池产量为48.8GW，同比增长77.8%；1-8 月光伏电池累计产量为333.3GW，同比…	https://stock.finance.sina.com.cn/stock/go.php/vReport_Show/kind/lastest/rptid/749034570344/index.phtml
749079861182	国芯科技(688262)：利润短期承压 RAID、边缘计算新品进展顺利	在手订单充足，利润短期承压：收入端，2023 年H1 公司营收同比增长，主要系公司在边缘计算领域的收入有所增长。截至2023 年6 月30 日，公司汽车电子和工业控制业务的在手订单金额为0.73 亿元，信创和信息安全业务的在手订单金额为0.57 亿元，边缘计算（高性能计算）和人工智能业务的在手订单为4.13 亿元。公司在手订单充足，有望在下半年实现营收增长。利润端，2023 年H1，公司净利润同比转亏，主要系IP 授权收入减少，同时由于市场竞争加剧导致了产品价格下调，晶圆等生产成本增加，导致公司业务收入毛利率下降。公司综合毛利率为25.55%， 同比减少27.85pct； 净利率为-16.93%，同比减少46.10pct；公司净利率下降，导致上半年利润有所承压，主要原因是：1.公司生产成本增长；2.公司期间费用增长。费用端，2023 年H1 公司销售、管理、研发、财务费用率分别为9.24…	http://stock.hexun.com/2023-09-26/210382750.html
749110934172	注射笔行业专题：一支小笔大讲究 卡位星辰大海	类别：行业_x000D_ 机构： 德邦证券股份有限公司 研究员：陈铁林/王艳/刘闯 日期：2023-09-27 注射笔覆盖患者群体数量广阔，下游糖尿病+减重相关药品市场规模超千亿级，GLP-1推动注射笔新机遇：注射笔具备精准定量注射、自主医疗、使用安全便捷核心优势，精准契合糖尿病、减重等长期用药患者人群需求，逐步成为主流注射方案。2021年重复使用注射笔约占糖尿病注射器总市场的81.69%。全球药企抢滩布局GLP-1，以诺和诺德百亿美元级大单品司美格鲁肽为代表的相关产品的拉动，预计全球糖尿病+肥胖两大领域近千亿美元市场加速扩容，催化行业迎全新发展机遇。_x000D_ _x000D_ 诺和诺德、礼来、赛诺菲三家占据全球80%注射笔份额，注射笔专利壁垒高筑，国产加速突破：胰岛素笔核心结构专利超过1500项且大多数被国外企业已抢注，礼来、诺和诺德、赛诺菲三家占据注射笔市场80%份额，随胰岛素专…	https://stock.finance.sina.com.cn/stock/go.php/vReport_Show/kind/lastest/rptid/749110934172/index.phtml
749148630046	资本债月报(2023年9月)：利差有所上行	类别：债券_x000D_ 机构： 中信证券股份有限公司 研究员：明明/丘远航 日期：2023-09-27 9 月（截至26 日，下同）资本债净融资水平小幅波动，转为净偿还，但预计4季度供给将提速。利差方面，近期有所上行，后续在基准利率扰动和供需失衡的背景下，建议提防波动加大的风险。_x000D_ _x000D_ 9 月银行资本债净偿还15 亿元。2023 年9 月，银行资本工具共发行19 只，规模合计1659 亿元，当月净偿还15 亿元。当月发行的19 只资本债中，银行永续债和二级资本债分别有3 只和16 只。_x000D_ _x000D_ 二级债利差上行明显。以加权平均值来看，2023 年9 月，二级资本债相对于同期限国开债的利差上行8bps。分类型来看，国有行、股份行、城商行和农商行二级债的利差分别变动+9bps、+7bps、+9bps 和+17bps。_x000D_ _x000D_…	https://stock.finance.sina.com.cn/stock/go.php/vReport_Show/kind/lastest/rptid/749148630046/index.phtml
749207923124	8月物价数据点评：CPI和PPI底部或已确认	类别：宏观_x000D_ 机构： 首创证券股份有限公司 研究员：韦志超/崔紫涵 日期：2023-09-28 事件：9月9日，国家统计局公布8月份物价数据，数据显示：8月CPI 同比录得0.1%，预期值0.2%，前值-0.3%，环比录得0.3%，前值0.2%。8 月PPI 同比录得-3.0%，预期值-2.9%，前值-4.4%，环比0.2%，前值-0.2%。_x000D_ _x000D_ 8 月CPI 同比录得0.1%，边际有所改善，环比0.3%，基本回归季节性均值，主要系猪肉、燃油和服务拉动。食品分项中，猪肉和蛋类是主要拉动项。蛋类价格环比高增，但基本符合季节性。受部分地区极端天气影响调运、养殖户压栏惜售及中央储备猪肉收储支撑市场信心等影响，猪价环比高增，录得11.40%，明显高于历史同期的5.96%。考虑到能繁母猪存栏同比短期内基本维持震荡，后续猪价跌幅可能相对有限。_x000D_ _x…	https://stock.finance.sina.com.cn/stock/go.php/vReport_Show/kind/lastest/rptid/749207923124/index.phtml
748607072975	轻工造纸行业2023年中报回顾总结：行业格局持续优化 Q2盈利表现更好	类别：行业_x000D_ 机构： 上海申银万国证券研究所有限公司 研究员：屠亦婷/周海晨/黄莎/庞盈盈/张海涛/张文静/魏雨辰 日期：2023-09-21 本期投资分析意见：_x000D_ _x000D_ 投资观点：Q2 收入呈现恢复态势，轻工各细分赛道仍延续整合趋势，行业格局逐步优化，头部企业供应链优势、品牌议价能力凸显，盈利能力修复好于收入。家居：竣工改善形成业绩支撑，地产政策转向提振板块估值，多渠道布局、多品类延伸、多品牌拓展的企业有望持续表现强Alpha 属性，看好索菲亚、顾家家居、志邦家居、欧派家居、好太太、瑞尔特、箭牌家居、慕思股份、喜临门、居然之家等。出口链：企业增长分化，关注顺应海外价值链升级个股，如嘉益股份、乐歌股份、匠心家居等。_x000D_ _x000D_ 造纸：装饰原纸供求关系边际改善，行业竞争有序，纸价较为坚挺，期待盈利弹性释放，关注华旺科技。Q2造纸行业触底拐…	https://stock.finance.sina.com.cn/stock/go.php/vReport_Show/kind/lastest/rptid/748607072975/index.phtml
749204872557	威腾电气(688226)：深耕母线行业 焊带与储能业务打开增长空间	类别：公司_x000D_ 机构： 华鑫证券有限责任公司 研究员：张涵/臧天律 日期：2023-09-28 深耕母线行业，焊带与储能业务打开增长空间_x000D_ _x000D_ 威腾电气集团股份有限公司成立于2004 年，自成立以来，公司深耕母线市场。公司现有配电设备、光伏新材及储能系统三大业务，产品广泛应用于新能源、工业制造、电力电网、数据通讯、轨道交通、商业地产等行业。_x000D_ _x000D_ 公司近年营收规模持续增长，自2019 年9.08 亿上升至2022年16.36 亿，对应CAGR 为21.68%；2023H1 实现营收10.34亿，同比增长40.48%。公司归母净利润连续3 年呈上升态势，自2020 年0.47 亿上升至2022 年0.7 亿，对应CAGR 为21.34%，2023H1 实现归母净利润0.39 亿元，同比增长18.91%。公司业绩稳步向好。_x000D…	https://stock.finance.sina.com.cn/stock/go.php/vReport_Show/kind/company/rptid/749204872557/index.phtml
748905818063	能源金属周报：节前备货需求释放 小金属钒、镓等价格上涨	本周（9.18-9.22）沪深300 指数上涨0.3%，其中有色指数跑输大盘，下跌2.1%。个股层面，本周合金投资、斯瑞新材势头良好，涨幅均超过3%；东方钽业、博迁新材、银河磁体跌幅较大，超过6%。 锂：本周碳酸锂价格17.2 万元/吨，环降7.28%；氢氧化锂价格16.3 万吨/元，环降5.23%；广期所碳酸锂2401 合约价格环降8.2%至15.62 万元/吨。需求端本周三元价格环降4%，铁锂价格环降4.5%，六氟价格环降4.8%。 8 月国内新能源车销售量84.6 万辆，环涨8.44%；国内动力电池装车量34.88GWh，环涨8.2%。根据产业链调研，预计9-10月排产环比持平或略增。供给端本周原料端锂辉石价格环降2.3%至3030 美元/吨；碳酸锂库存3.2 万吨，环降1.87%；氢氧化锂库存1.3 万吨，环降0.7%。近一个月锂价下跌幅度较大，下游采购偏谨慎观望，未见大量补库，…	http://stock.hexun.com/2023-09-25/210348720.html
748951050973	沧州明珠(002108)：隔膜销量保持增长 加码扩产湿法项目	类别：公司_x000D_ 机构： 东方证券股份有限公司 研究员：卢日鑫/李梦强/顾高臣/林煜 日期：2023-09-25 事件：公司近期发布2023 年半年报。上半年实现营业收入13.2 亿元，同比-0.5%；实现归母净利润1.7 亿元，同比+2.8%。单二季度来看，公司实现营业收入6.9 亿元（-15.0%），实现归母净利润0.8 亿元（-19.4%）。盈利水平方面，公司上半年综合毛利率为17.0%，同比-1.0pct，净利率为12.9%，同比+0.3pct。单二季度毛利率为18.0%，同比变动-0.5pct，净利率为12.2%，同比变动-1.2pct。上半年四费率为6.3% ， 同比变动-1.3pct ， 其中管理/ 销售/ 研发/ 财务费用率分别为2.6%/2.5%/1.2%/0.0%，同比变动0.0pct/-0.1pct/+0.1pct/-1.3pct。单二季度四费率为6.1%，…	https://stock.finance.sina.com.cn/stock/go.php/vReport_Show/kind/company/rptid/748951050973/index.phtml
749041614133	数字经济监管与发展双周观察：“首席数据官”有哪些职责	类别：宏观_x000D_ 机构： 东方证券股份有限公司 研究员：陈至奕/孙金霞/陈玮/孙国翔 日期：2023-09-26 研究结论_x000D_ _x000D_ 近期多地“首席数据官”制度正式落地，包括：（1）9 月18 日广州正式印发《广州市全面推行首席数据官制度工作方案》，此外早在2021 年7 月20 日广州市政府办公厅就已经印发《广州市推行首席数据官制度试点实施方案》；（2）作为在数字政府工作方面具有一定特色的地区，南昌（数据共享创新应用获国务院电政办在全国推介）近期出台“首席数据官”制度工作方案，方案明确南昌市直各部门、县(区)政府、有关国企全面推行“首席数据官”制度。在南昌市级层面设立“首席数据官”一名，由分管数字政府改革建设工作的市领导兼任。各县区(开发区、管理局)、市直部门、市属相关国有企业分别设立“首席数据官”一名，由分管数字政府改革建设工作的县(区)领导或本部门领导班…	https://stock.finance.sina.com.cn/stock/go.php/vReport_Show/kind/lastest/rptid/749041614133/index.phtml
728466153359	指南针(300803)：2022年业绩预告超预期;券商业务步入正轨	指南针发布业绩预告：预计2022 年归母净利润同比+87%-110%至3.3-3.7亿元，扣非后净利润同比+100%-125%至3.2-3.6 亿元，预告业绩超过我们及市场预期，其中公司预计麦高证券（原网信证券更名后）自7 月末并表后8-12 月已实现扭亏为盈、并入公司后对合并利润水平将产生正向影响。 关注要点 券商业务逐步步入正轨，麦高证券开始“迈高”。据麦高证券未经审计非合并财报：2022 年营收同比+36%至6,309 万元、其中利息净收入同比+98%至1,621 万元/手续费及佣金净收入3,591 万元，代理买卖证券款同比+96%至12 亿元，业务已有明显改善。并表券商后，指南针加大人员建设和研发投入，并尝试性地进行了一定规模的客户导流、取得初步成效，我们测算指南针并表麦高证券后4Q券商营收较8&9 月大幅增长，且券商营业利润亏损幅度有所收窄，考虑递延所得税资产影响后净利润实现扭…	http://stock.hexun.com/2023-01-31/210385166.html
748613818167	农林牧渔行业月报：8月出栏量环比平稳销售价格反弹明显	类别：行业_x000D_ 机构： 国金证券股份有限公司 研究员：刘宸倩 日期：2023-09-21 行业观点_x000D_ _x000D_ 生猪价格在8 月中旬达到高点后，在行业出栏量持续增加、二次育肥情绪降温、下游消费疲软等因素的影响下，生猪价格开始走弱。根据涌益咨询数据，8 月生猪销售均价为17.15 元/公斤，月环比增长19.40%；9 月18 日生猪价格为16.38 元/公斤，周环比下滑0.73%，月环比下滑5.86%。仔猪价格则持续保持低迷，根据涌益咨询数据，当周（9.8-9.14）15 公斤仔猪销售价格为416 元/头，周环比-20 元/头；市场上7 公斤仔猪成交价则普遍在300 元/头以内，仔猪销售陷入严重亏损状态，多数规模场销售仔猪亏损在100 元/头以上。仔猪价格低迷主要系养殖户对年后价格预期较差，同时冬季为疫病频发期，此时购进仔猪养殖存活率偏低，养殖户外购仔猪积极性不…	https://stock.finance.sina.com.cn/stock/go.php/vReport_Show/kind/lastest/rptid/748613818167/index.phtml
748623936887	常铝股份(002160)：铝加工领军企业 布局新能源有望再突破	类别：公司_x000D_ 机构： 东吴证券股份有限公司 研究员：陈淑娴 日期：2023-09-21 扎根铝加工行业，产业链一体化协同发展：公司是工业热传递材料与设备领域，以及洁净技术与污染控制领域的综合解决方案服务商，产品涵盖空调铝箔、合金铝箔等多个品种，核心客户覆盖空调、传统汽车、新能源汽车、食品及医疗等行业。目前公司铝加工业务布局完善，实现由上游材料到中游深加工再至下游铝制终端部件产品开发与应用的纵向产业链一体化布局。2022 年公司实现营业收入 67.85 亿元，位居铝加工行业前列。_x000D_ _x000D_ 新能源用铝材料产能投放节奏加快，产量释放有望贡献业绩增量。公司现已深度绑定比亚迪、宁德时代等众多下游新能源汽车领域头部企业客户，电池壳体、电池箔业务产品近年来需求表现强劲，有望成为公司未来铝加工业务“量增价涨”的核心驱动力。根据公司公告，3 万吨电池箔项目预计将在2024…	https://stock.finance.sina.com.cn/stock/go.php/vReport_Show/kind/lastest/rptid/748623936887/index.phtml
748880593188	申万新型电力系统(公用环保)周报：现货市场核心文件出台 首批CCER方法学有望近期审核	电力： 电改核心文件出台 相较征求意见稿市场化程度更高 9 月18 日国家发改委网站公开《电力现货市场基本规则（试行）》。自从7 月11 日中央深改委会议通过《关于深化电力体制改革 加快构建新型电力系统的指导意见》后（新华社报道），市场对新一轮电改的讨论空前升温。结合我国近年来的改革实践以及欧美发达国家经验来看，面对能源结构转型与产业结构转型带来的电力供需双向变化，以高频竞价、边际出清为特点的现货市场是被证明行之有效的手段，所谓“无现货、不市场”，建立现货市场将成为我国新一轮电改的核心。 此次公开的试行版本充分体现了该思想，而且相比征求意见稿，试行版本的市场化程度更高。同时，文件提出进一步提高现货市场价格信号的作用，源网荷储运行和电网建设均以现货市场交易结果为参考。有助于提升系统运行效率，节约资本开支。将“成本最小原则”改成“社会福利最大原则”，避免了极端追求低价倾向。试行版本第29 条…	http://stock.hexun.com/2023-09-25/210357997.html
748905046915	固定收益点评报告：情绪温和改善 基金久期拉长――债市情绪指数&欠配指数跟踪	类别：债券_x000D_ 机构： 海通证券股份有限公司 研究员：孙丽萍 日期：2023-09-24 摘要：_x000D_ _x000D_ 1、 债市情绪指数：情绪继续温和改善，基金久期拉长9/18~9/22 当周债市情绪指数继续小幅上行（主要是银行间债市杠杆率上行、中长期纯债基金拉长久期、10Y 国开债隐含税率下降），平滑后的债市情绪指数（4 周-MA）也小幅抬升。_x000D_ _x000D_ 情绪升温的指标有：_x000D_ _x000D_ 10Y 国开债隐含税率。_x000D_ _x000D_ 银行间债市杠杆率，保险和券商债市杠杆率（环比抬升）；交易所债市杠杆率（环比抬升）。_x000D_ _x000D_ 中长期纯债型基金久期继续拉长（带杠杆、中位数）且久期分歧指数继续小幅下降，扣除杠杆后基金久期（中位数）也明显拉长。_x000D_ _x000D_ 情绪降温的指标有：_x000D_…	https://stock.finance.sina.com.cn/stock/go.php/vReport_Show/kind/lastest/rptid/748905046915/index.phtml
749234319871	中贝通信(603220)动态点评：锐意进取 积极布局智算	类别：公司_x000D_ 机构： 东方财富证券股份有限公司 研究员：邹杰 日期：2023-09-28 【事项】_x000D_ _x000D_ 9 月公司与中国联通青海省分公司签订了算力服务框架协议，鉴于中贝拥有AI 算力资产，中国联通青海省分公司拟向中贝批量采购AI 算力服务，用于自用或向第三方提供增值算力服务。合同细节显示，联通青海省分公司负责提供算力服务平台所需的存储设备与基础网络设备、外网通道、机房环境、机柜、日常维护及客户引入，由中贝负责提供H800 算力服务器以及相应的IB 网络交换机和配套光模块、线缆与管理平台，负责在租赁期内的维保。协议双方以H800 设备为基础搭建算力服务平台，提供960P 算力服务，服务费按照含税12 万元/P/年计算，算力平台计划自2023 年11 月1 日起运行，协议服务期限三年，服务费总金额为含税3.456 亿。_x000D_ _x000D_ 同月…	https://stock.finance.sina.com.cn/stock/go.php/vReport_Show/kind/company/rptid/749234319871/index.phtml
749111249555	数据研究·专题：新能源汽车景气度跟踪：M9W3订单同／环比均增长 个别车企新车余热不减	类别：行业_x000D_ 机构： 天风证券股份有限公司 研究员：孙谦/于特/曹雯瑛 日期：2023-09-27 1. 2023 年9 月新能源车订单跟踪_x000D_ _x000D_ 9 月周订单跟踪：9 月第3 周（9.15-9.21）4 家车企新增订单9.0-10.0 万辆，新增订单较M8W3 +8%至+13%，1 家车企新增订单的同比增速高于整体水平。_x000D_ _x000D_ 9 月前3 周订单跟踪：9 月前3 周（9.1-9.21）4 家车企新增订单25.0-26.0 万辆，新增订单较8 月同期 +9%至+14%，2 家车企新增订单的同比增速高于整体水平。_x000D_ _x000D_ 9 月订单预测：9 月（9.1-9.30）9 家车企新增订单43.0-44.0 万辆，新增订单较M8 +7%至+12%，5 家车企新增订单的环比增速高于整体水平。_x000D_ _x000D…	https://stock.finance.sina.com.cn/stock/go.php/vReport_Show/kind/lastest/rptid/749111249555/index.phtml
749150512140	中科星图(688568)2023中报点评：营收与归母净利润创同期新高 第二增长曲线取得737万元营收	类别：公司_x000D_ 机构： 中航证券有限公司 研究员：王宏涛/张超/滕明滔 日期：2023-09-27 各类业务拓展均有成效，营收与归母净利润创同期新高。2023H1，公司营业收入(7.22亿元，+60.78%)、归母净利润(0.35亿元，+55.88%)以及扣非归母净利润（0.11亿元，+442.29%)均实现大幅增长，创同期新高，主要系在公司集团化发展的推动下，实现对各细分市场的渗透，业务规模扩大。毛利率(51.67%6，+3.05pcts)和净利率(9.02%，+2.75pcts)亦创上市以来同期新高。_x000D_ _x000D_ 费用率稳中有降,研发投入持续增长。2023H1公司三费费率(19.66%,-5.00pcts)显著下降，规模效应逐步显现。研发投入总额(1.84亿元,+72.40%）和研发投入占营收的比例(25.42%，+1.71pcts）有所提升,研发人员突破…	https://stock.finance.sina.com.cn/stock/go.php/vReport_Show/kind/company/rptid/749150512140/index.phtml
749230328883	好太太(603848)：股权激励彰显成长信心 智能晾晒赛道扩容驱动增长	类别：公司_x000D_ 机构： 上海申银万国证券研究所有限公司 研究员：屠亦婷/周海晨/庞盈盈 日期：2023-09-28 投资要点：_x000D_ _x000D_ 公司发布2023 年股票激励计划：拟以7.92 元/股价格授予限制性股票321 万股，占公司总股本0.8%，激励对象涵盖董监高、中层业务人员合计40 人，占员工总数3.5%。_x000D_ _x000D_ 发布股权激励计划，提振团队士气，彰显发展信心。激励计划拟授予40 名员工321 万股公司股票，其中授予董事、高级管理人员4 人合计88 万股，授予中层管理人员及核心业务（技术）人员36 人合计233 万股。此次激励计划将分2 期解除限售，自授予登记完成之日起1-2 年内、2-3 年内分别解除限售比例50%，对应业绩考核目标分别为：1）第一个解除限售期：以2022 年收入为基数，2023 年收入同比增速不低于20%；2）第…	https://stock.finance.sina.com.cn/stock/go.php/vReport_Show/kind/company/rptid/749230328883/index.phtml
748628596761	白色家电行业：总销量同比基本持平 出口表现亮眼	2023 年8 月空调内销同比-9.7% 根据产业在线数据，2023 年8 月内销同比增速环比明显回落，增速转负（7月同比+27.6%），但较2019 年8 月仍增长+9.5%；综合2023 年1-8 月数据来看，内销同比+20.4%，较疫情前2019 年1-8 月增长+12.6%。今年上半年高温天气集中及促销力度较大，国内消费者空调购买需求提前释放，下半年需求相对回落。同时，由于去年上半年外部形势影响，下半年消费需求释放明显，去年同期内销基数相对较高。从品牌表现来看，1-8 月CR3 内销份额同比-4.2pct(1-7 月-3.9pct)。 2023 年8 月空调出口同比+27.5% 自5 月出口同比增速实现转正后，外销出货实现恢复性增长（5-7 月外销同比分别为+6.1%/+15.0%+12.9%）。随着上半年海外库存的消耗催生补库需求，加之海运价格下降以及汇率优势，叠加去年同期出口…	http://stock.hexun.com/2023-09-21/210308056.html
749034521009	联泓新科(003022)：业绩短期承压 发力POE赛道强化新材料业务布局	类别：公司_x000D_ 机构： 德邦证券股份有限公司 研究员：李骥/沈颖洁 日期：2023-09-26 事件：8 月30 日，公司发布2023 年中报，2023 年上半年营收32.1 亿元，同比下降18.6%，归母净利润3.3 亿元，同比下降28.6%。此外公司于8 月24 日发布关于设立合资公司投资POE 项目的公告。_x000D_ _x000D_ H1 产品价格下滑影响整体盈利，Q2 盈利能力有所修复。2023 年上半年，宏观经济弱复苏，能源价格高位，终端消费低迷，市场需求恢复缓慢，公司主要产品价格同比下滑，实现营业收入32.1 亿元，同比下降18.6%，产品与原料价差收窄，毛利率有所降低，导致公司上半年实现归母净利3.3 亿元，同比下降28.6%。二季度，产品价格企稳回升，公司盈利能力有所修复，单季度营收实现16.31 亿元，环比增长3.5%，经营业绩环比改善，实现归母净利1.7…	https://stock.finance.sina.com.cn/stock/go.php/vReport_Show/kind/company/rptid/749034521009/index.phtml
748618990601	山河药辅(300452)：业绩符合预期 新产品布局日益丰富	类别：创业板_x000D_ 机构： 首创证券股份有限公司 研究员：王斌 日期：2023-09-21 事件：公司发布2023 年半年报，报告期内实现营业收入4.53 亿元（+25.83%），归属于上市公司股东的净利润8833 万元（+33.51%），扣除非经常性损益的净利润8183 万元（+38.00%）。_x000D_ _x000D_ 现有产品线多点发力，新品种布局日益丰富。分产品来看，2023 年上半年纤维素及衍生物类收入2.05 亿元（+15.00%）,预计主要是受益于微晶纤维素和羟丙甲纤维素（下游为植物胶囊）需求持续增长带动；淀粉及衍生物类收入1.12 亿元（+29.74%），预计主要是受益于疫情放开后普药需求量增长带动。2023 年上半年公司加大新产品布局力度，在CDE新增 2 个新产品登记，其中邻菲罗啉（供注射用）是公司自主开发的第二款注射级药用辅料。8 月23 日公司公告，新…	https://stock.finance.sina.com.cn/stock/go.php/vReport_Show/kind/lastest/rptid/748618990601/index.phtml
749057310415	携程集团-S(09961.HK)：供应链及品牌力筑核心壁垒 国际化布局有望贡献增量	投资要点_x000D_ OTA 行业领军者，国内业务恢复强劲。携程为国内OTA 龙头，聚焦中高端用户群体，布局全球在线旅游。以GMV 计算，2021 年携程旅行占据OTA 领域36.3%的市场份额。2023 年，伴随疫情放开，公司业务实现迅速恢复。2023H1，携程集团实现净收入204.45 亿元，同比增长152%。其中，23Q2 国内酒店预订量同比增长170%。_x000D_ 短期出境游方面供给恢复将释放需求，中国在线旅游市场长期有望扩容。疫情期间旅游市场遭受大幅压制。2023 年以来，国内需求反弹迅速，但出境游仍受限于供给端恢复情况。根据航旅纵横，暑运期间，国内航司出入境实际航班量仅恢复至2019 年同期54%。我们认为出境供给恢复仍将驱动出境需求释放。国内旅游方面，长期来看，随人均收入提升及线上化率提升，在线旅游市场有望扩容。_x000D_ 覆盖出行全链条，供应链及品牌力为核心壁垒…	https://finance.sina.cn/stock/relnews/us/2023-09-26/detail-imznzpkc1178603.d.html?vt=4
749147547191	全球流动性观察系列9月第4期：微观流动性有待提振	类别：策略_x000D_ 机构： 国泰君安证券股份有限公司 研究员：方奕/黄维驰/郭胤含/田开轩 日期：2023-09-27 本报告导读：_x000D_ _x000D_ 本期投资者观望情绪明显，交易热度进一步回落，但交易核心仍在科技成长板块。资金行为上，内外资投资分歧收敛，外资悲观情绪缓和，两融极度乐观情绪有所平复。_x000D_ _x000D_ 摘要：_x000D_ _x000D_ 市场交易热度 进一步回落，交易核心仍在科技成长。1）本期（9.18-9.22）美债利率快速上行、国内政策成效尚待显现叠加节前资金避险情绪，市场整体维持窄幅整理状态，交投意愿低迷，沪深两市日成交额均值由上期的7241 亿元降至本期的6520 亿元，已逼近22 年10 月低点。2）从板块交易热度看，市场整体交易核心仍在科技成长，本期电子、计算机和医药行业成交额占比明显居前，分别为11%、10%和9%。而从行业换…	https://stock.finance.sina.com.cn/stock/go.php/vReport_Show/kind/lastest/rptid/749147547191/index.phtml
748634334623	华润燃气(01193.HK)：价改旧改多重机遇 盈利能力修复可期	全国性城燃国企，燃气主业长期向好。华润燃气背靠华润集团，是全国跨区域综合能源供应及服务企业之一。公司主营业务包括燃气销售、接驳业务、综合服务业务，并积极发展综合能源业务。公司在长三角、珠三角、京津冀及川渝等经济发达区域形成优势经营区域，销气增长可长期持续。 2022 年，公司销气量逆势增长5.3%至达359 亿m?，全国市占率约10%。随着全国疫后经济逐渐复苏，全国天然气消费量重回正增长轨道，公司主营业务有望长期稳定发展。_x000D_ 居民气顺价改善+工商销气复苏，毛差有望持续反弹。2022 年，在国际气价高企，居民气顺价不畅，公司销气结构恶化的背景下，公司天然气销售毛差下降至0.45 元/m?。今年以来，全国范围内天然气上下游价格联动机制的建设与落实不断加强，其中四川、江苏，河北、安徽等业务集中的省份的部分城市终端顺价幅度已超10%。叠加考虑国际气价大幅回落，价格敏感、毛差更高的工商…	https://finance.sina.cn/stock/relnews/hk/2023-09-21/detail-imznnizm3266811.d.html
748867315127	社会服务行业研究：酒店暑期业绩亮眼 长假旅游热度上扬	中国内地酒店暑期业绩亮眼，需求、价格持续回升。中国的旅游消费市场在前8 个月呈现出明显回暖趋势。根据STR 数据，截止2023 年7月，对比2019 年同期，中国内地酒店Occ 指数为98，离2019 年同期仍然有2%的整体差距，尽管上半年出现了几次短期的集中需求释放，但整体仍未完全恢复。ADR 指数为104，超过2019 年同期4%。受到房价提升的影响，RevPAR 指数达到了102，超过了2019 年同期年累计，呈现向好态势。截至202 年9 月9 日，日度数据显示中国内地酒店每房收入在2023 年春节和“五一”假期出现两次集中提升，均大幅超出2019 年同期。上半年的近七天RevPAR 均值最高点出现在5 月2 日，达到人民币509 元。从7 月份开始，中国内地酒店每房收入表现持续超越2019 年同期。随着暑期结束，全国各地纷纷开学，酒店收入表现急速回落。8 月最后一周和9 月第一…	http://stock.hexun.com/2023-09-24/210340407.html
748884187130	纺织服装行业周报：国内服装品牌亮相亚运会 有望点燃运动热潮	类别：行业_x000D_ 机构： 上海申银万国证券研究所有限公司 研究员：王立平/求佳峰/刘佩/李璇 日期：2023-09-23 本期投资提示：_x000D_ _x000D_ 本周纺织服饰板块表现弱于市场。9 月18 日-22 日，SW 纺织服饰指数下跌1.0%，跑输SW 全A 指数1.3pct。其中，SW 服装家纺指数下跌0.6%，跑输SW 全A 指数1.0pct；SW 纺织制造指数下跌0.4%，跑输SW 全A 指数0.7pct。_x000D_ _x000D_ 近期行业数据：1）社零：8 月限额以上服装鞋帽、针织品类零售总额达982 亿元，同比增长4.5%，1-8 月累计额达8760 亿元，同比增长10.6%。2）出口：8 月国内纺织业出口额达279 亿美元，同比下滑10.1%。其中，纺织品出口额同比下滑6.4%至117 亿美元，服装出口额同比下滑12.5 %至162 亿美元。3）棉价…	https://stock.finance.sina.com.cn/stock/go.php/vReport_Show/kind/lastest/rptid/748817828406/index.phtml
749120120023	吉祥航空(603885)：供需修复亮眼 看好暑运旺季盈利弹性	类别：公司_x000D_ 机构： 首创证券股份有限公司 研究员：张功/张莹 日期：2023-09-27 事件：公司发布2023 年半年业绩，2023 上半年收入93.31 亿元，同比增长59.20 亿元（同比+173.56%）；归母净利润0.62 亿元，同比增长19.52亿元。其中，23 年第二季度实现收入48.89 亿元，同比增长39.6 亿元（同比+428.5%），环比增长4.5 亿元（环比+10.1%）；归母净利润-1.03亿元，同比减亏12.4 亿元。_x000D_ _x000D_ 航空客运稳步复苏，客运量提升带动23 上半年收入增长，国内航线超过19 年同期，国际、地区航线复苏情况亮眼。根据民航局2023 年1-6月主要生产指标统计，共完成运输总周转量531.3 亿吨公里、旅客运输量2.84 亿人次、货邮运输量327.6 万吨，为2019 年同期的84.6%、88.2%、93.…	https://stock.finance.sina.com.cn/stock/go.php/vReport_Show/kind/company/rptid/749120120023/index.phtml
748889273665	卓胜微(300782)：业绩改善 持续创新	2023 年8 月29 日，公司发布2023 年半年度报告，2023 年1-6月，公司实现营业收入16.65 亿元，同比下降25.49%；归母净利润3.67 亿元，同比下降51.26%。_x000D_ 投资要点_x000D_ Q2 毛利率环比止跌，终端库存改善。公司公布2023 年半年报，2023 年上半年公司实现营业收入16.65 亿元，同比下降25.49%；归母净利润3.67 亿元，同比下降51.26%。其中，Q2 实现营收9.54 亿元，同比增长5.39%,环比增长34.00%,Q2 归母净利润为2.50 亿元，同比下降14.58%，环比下降114.66%。公司净利润下降主要原因为公司主要下游应用智能手机市场需求疲软，且研发费用、管理费用等较去年同期上升。上半年，公司期间费用合计3.25 亿元，同比增长46.82%，其中研发费用2.54 亿元，同比增长50.79%。随着产品结构及市…	http://stockfinance.sina.cn/stock/go.php/paper/reportid/748889273665/index.phtml?vt=4&cid=76524&node_id=76524
749109857361	皖能电力(000543)：控股参股火电盈利提升 新能源业务促多能发展	类别：公司_x000D_ 机构： 国联证券股份有限公司 研究员：贺朝晖 日期：2023-09-27 成本改善，中报业绩高增_x000D_ _x000D_ 2023 年8 月底，公司发布《2023 年半年度报告》，公司实现营收122.36 亿元,同比-2.42%，实现归母净利润5.85 亿元，同比+74.58%，实现扣非归母净利润5.34 亿元，同比+113.16%。营收下降主要系公司煤炭业务营收降低。_x000D_ _x000D_ 受益煤价逐季下降，公司盈利能力逐季修复，公司Q1 煤价约1100 元/吨，Q2 入炉标煤逐季下降，7 月跌破1000 元/吨，改善盈利能力，23H1 公司发电行业毛利率7.9%，同比+1.7%。_x000D_ _x000D_ 含“火”量高，新机组投产+参股煤电联营收益稳增_x000D_ _x000D_ 截至2023 年9 月，公司控股火电装机14.07GW（在…	https://stock.finance.sina.com.cn/stock/go.php/vReport_Show/kind/company/rptid/749109857361/index.phtml
748598915888	盘江股份(600395)：煤价下跌拖累业绩 西南地区煤炭龙头盈利稳健	点评：_x000D_ 上半年煤价下跌拖累业绩，煤炭毛利率同比下降。根据公司2023 中报，上半年煤炭业务实现营收51.53 亿元（同比-15.80%），营业成本为36.30 亿元（同比+6.76%），毛利率为29.6%（同比-14.6pct）。公司2023 上半年吨煤售价为764 元/吨（同比-227.48 元/吨）。产量方面，公司生产原煤799.85 吨（同比+8.51%），生产商品煤639.96 万吨（同比+14.42%），商品煤销量为674.28 万吨（同比+9.23%）。其中，焦（精）煤销量为238.69 万吨（同比+1.23%），自产精煤销量为224.10 万吨（同比+3.56%）。动力煤销量为435.59 万吨（ 同比+14.18%）， 自产动力煤销量为416.34 万吨（同比+18.69%）。截至2023 年6 月30 日，公司产能合计1,980 万吨/年，较2022年底增…	http://stockfinance.sina.cn/stock/go.php/paper/reportid/748598915888/index.phtml?vt=4&cid=76524&node_id=76524
748611420821	招明理财指数报告：2023年9月期：债市调整下的理财收益率情况	类别：行业_x000D_ 机构： 招商证券股份有限公司 研究员：廖志明/邵春雨/戴甜甜 日期：2023-09-21 理财公司已成为理财业务的发展主体，理财已进入真净值时代。截至9 月15 日，现金管理类理财平均7 天年化收益率2.12%，近一个月收益率略微下降。由于债市调整，9 月上半月定开纯固收、固收+和持有期固收类理财净值回撤，半月年化收益率分别为-2.1%、-0.9%与-2.8%。截至9 月15 日，定开纯固收、固收+和持有期固收类理财平均近3 个月年化收益率分别为2.2%、2.4%和1.3%；近半个月混合类理财净值小幅下降；近1 个月，权益类理财净值明显下跌。_x000D_ _x000D_ 理财进入真净值时代是我们推出招明理财指数的背景。理财公司已逐步成为理财业务的发展主体，银行理财逐步公募基金化，进入真净值时代，理财收益将完全取决于投资收益。我们依托大数据跟踪数千只理财净值走势…	https://stock.finance.sina.com.cn/stock/go.php/vReport_Show/kind/lastest/rptid/748611420821/index.phtml
748678243196	化工：俄罗斯限制油出口 加剧全球油品供需紧张	类别：行业_x000D_ 机构： 中国国际金融股份有限公司 研究员：严蓓娜/傅锴铭/裘孝锋 日期：2023-09-22 行业近况_x000D_ _x000D_ 9 月21 日，俄罗斯政府宣布将临时限制成品油出口，以缓解国内成品油供应紧张。俄罗斯的成品油出口250 万桶/日；当前柴油出口为100 万桶/日，环比8 月已经下降30%；汽油出口为10 万桶/日。减产相当于全球柴油需求的3%。由于全球柴油库存处于较低水平，且10 月之后进入到全球柴油消费旺季，可能进一步提升综合炼油毛利。_x000D_ _x000D_ 评论_x000D_ _x000D_ 全球炼油产能偏紧_x000D_ _x000D_ 全球炼厂的产能利用率持续处于高位。虽然23 年是全球炼厂的投放大年，但墨西哥和尼日利亚的投放进度不及预期。往后看，全球的炼厂产能增长缓慢，印度等新兴市场产能建设接近尾声，中国减油增化减少简单炼油产能…	https://stock.finance.sina.com.cn/stock/go.php/vReport_Show/kind/lastest/rptid/748678243196/index.phtml
[truncated: 910 more rows]
